# Supplementary material for: Exposure to Phthalates in European Children, Adolescents and Adults since 2005: A Harmonized Approach Based on Existing HBM Data in the HBM4EU Initiative
Source: MDPI journal article supplement (doi:10.3390/toxics11030241), 2023-03-04
Supplement: s1 [file s1]

## Exposure to Phthalates in European Children, Adolescents and Adults Since 2005: A Harmonized Approach Based on Existing HBM Data in the HBM4EU Initiative

Nina Vogel <sup>1,\*</sup>, Rosa Lange <sup>1</sup>, Phillipp Schmidt <sup>1</sup>, Laura Rodriguez Martin <sup>2</sup>, Sylvie Remy <sup>2</sup>, Andrea Springer <sup>1</sup>, Vladimíra Puklová <sup>3</sup>, Milena Černá <sup>3</sup>, Péter Rudnai <sup>4</sup>, Szilvia Középesy <sup>4</sup>, Beata Janasik <sup>5</sup>, Danuta Ligocka <sup>5</sup>, Lucia Fábelová <sup>6</sup>, Branislav Kolena <sup>7</sup>, Ida Petrovicova <sup>7</sup>, Michal Jajcaj <sup>8</sup>, Milada Eštoková <sup>8</sup>, Marta Esteban-Lopez <sup>9</sup>, Argelia Castaño <sup>9</sup>, Janja Snoj Tratnik <sup>10</sup>, Anja Stajanko <sup>10</sup>, Lisbeth E. Knudsen <sup>11</sup>, Jorma Toppari <sup>12,13</sup>, Katharina M Main <sup>14,15,16</sup>, Anders Juul <sup>14,15,16</sup>, Anna-Maria Andersson <sup>14,15</sup>, Niels Jørgensen <sup>14,15</sup>, Hanne Frederiksen <sup>14,15</sup>, Cathrine Thomsen <sup>17</sup>, Amrit Kaur Sakhi <sup>17</sup>, Agneta Åkesson <sup>18</sup>, Christina Hartmann <sup>19</sup>, Marie Christine Dewolf <sup>20</sup>, Gudrun Koppen <sup>2</sup>, Pierre Biot <sup>21</sup>, Elly Den Hond <sup>22</sup>, Stefan Voorspoels <sup>2</sup>, Liese Gilles <sup>2</sup>, Eva Govarts <sup>2</sup>, Aline Murawski <sup>1</sup>, Antje Gerofke <sup>1</sup>, Till Weber <sup>1</sup>, Maria Rütther <sup>1</sup>, Arno C Gutleb <sup>23</sup>, Cedric Guignard <sup>23</sup>, Tamar Berman <sup>24</sup>, Holger M Koch <sup>25</sup> and Marike Kolossa-Gehring <sup>1</sup>

- 1 German Environment Agency (UBA), Department of Toxicology, Health-related Environmental Monitoring, 14195 Berlin, Germany; rosa.lange@uba.de (R.L.); phillipp.schmidt@uba.de (P.S.); springeran67@gmail.com (A.S.); aline.murawski@uba.de (A.M.); antje.gerofke@uba.de (A.G.); till.weber@uba.de (T.W.); maria.ruether@googlemail.com (M.R.); marike.kolossa@uba.de (M.K.-G.)
- 2 Flemish Institute for Technological Research (VITO), 2400 Mol, Belgium; laura.rodriguezmartin@vito.be (L.R.M.); sylvie.remy@vito.be (S.R.); gudrun.koppen@vito.be (G.K.); stefan.voorspoels@vito.be (S.V.); liese.gilles@vito.be (L.G.); eva.govarts@vito.be (E.G.)
- 3 National Institute of Public Health, Centre for Health and Environment, 100 00, Prague, Czech Republic; vladimira.puklova@szu.cz (V.P.); milena.cerna@szu.cz (M.Č.); lucia.fabelova@szu.sk (L.F.)
- 4 National Public Health Center, Environmental Health Unit of the Department of Public Health Laboratory, 1097, Budapest, Hungary; prudnai1@gmail.com (P.R.); kozepesy.szilvia@nnk.gov.hu (S.K.)
- 5 Nofer Institute of Occupational Medicine, 91-348 Lodz, Poland; beata.janasik@imp.lodz.pl (B.J.); danuta.ligocka@gmail.com (D.L.)
- 6 Slovak Medical University, Faculty of Public Health, Department of Environmental Medicine, 83303 Bratislava, Slovakia; lucia.fabelova@szu.sk (L.F.)
- 7 Constantine the Philosopher University in Nitra, Faculty of Natural Sciences and Informatics, Department of Zoology and Anthropology, 949 01 Nitra, Slovakia; bkolena@ukf.sk (B.K.); ipetrovicova@ukf.sk (I.P.)
- 8 Public Health Authority, Department of Environment and Health, 83105 Bratislava, Slovakia; michal.jajcaj@uvzsr.sk (M.J.); milada.estokova@uvzsr.sk (M.E.)
- 9 Instituto de Salud Carlos III, 28220 Majadahonda, Spain; m.esteban@isciii.es (M.E.-L.); castano@isciii.es (A.C.)
- 10 Jožef Stefan Institute, Department of Environmental Sciences, Jamova cesta 39, 1000 Ljubljana, Slovenia; janja.tratnik@ijs.si (J.S.T.); anja.stajanko@ijs.si (A.S.)
- 11 University of Copenhagen, Department of Public Health, DK1165 Copenhagen, Denmark; liek@sund.ku.dk
- 12 Research Centre for Integrative Physiology and Pharmacology, Institute of Biomedicine, University of Turku, 20520 Turku, Finland; jorma.toppari@utu.fi
- 13 Department of Pediatrics, Turku University Hospital, Turku, Finland
- 14 Department of Growth and Reproduction, Copenhagen University Hospital—Rigshospitalet, 2100 Copenhagen, Denmark; katharina.main@regionh.dk (K.M.M.); anders.juul@regionh.dk (A.J.); anna-maria.andersson@regionh.dk (A.-M.A.); niels.joergensen@regionh.dk (N.J.); hanne.frederiksen@regionh.dk (H.F.)
- 15 International Centre for Research and Research Training in Endocrine Disruption of Male Reproduction and Child Health (EDMaRC), Copenhagen University Hospital—Rigshospitalet, 2100 Copenhagen, Denmark
- 16 Department of Clinical Medicine, University of Copenhagen, 2200 Copenhagen, Denmark
- 17 Department of Food Safety, Norwegian Institute of Public Health, 0456 Oslo, Norway; cathrine.thomsen@fhi.no (C.T.); amritkaur.sakhi@fhi.no (A.K.S.)
- 18 Institute of Environmental Medicine, Karolinska Institutet, 171 77 Stockholm, Sweden; agneta.akesson@ki.se
- 19 Environment Agency Austria, 1090 Vienna, Austria; christina.hartmann@umweltbundesamt.at
- 20 Hainaut Analyse, 7000 Mons, Belgium; marie\_christine.dewolf@hainaut.be
- 21 Federal Public Service Health, Food Chain Safety and Environment, Brussels, Belgium; pierre.biot@health.fgov.be
- 22 Provincial Institute of Hygiene (PIH), department of Environment and Health, 2000 Antwerp, Belgium; elly.denhond@provincieantwerpen.be
- 23 Luxembourg Institute of Science and Technology, Environmental Research and Innovation (ERIN) Department, L-4422 Belvaux, Luxembourg; arno.gutleb@list.lu (A.C.G.); cedric.guignard@list.lu (C.G.)
- 24 Department of Environmental Health, Ministry of Health, 9446724 Jerusalem, Israel; tamar.berman@moh.health.gov.il
- 25 Institute for Prevention and Occupational Medicine of the German Social Accident Insurance—Institute of the Ruhr University Bochum (IPA), 44789 Bochum, Germany; holger.koch@dguv.de

\* Correspondence: nina.vogel@uba.de

## Table of contents

|                                                                                                                                                    |    |
|----------------------------------------------------------------------------------------------------------------------------------------------------|----|
| Table S1: BBzP metabolite MBzP (Mono-benzyl phthalate) in microg/L .....                                                                           | 6  |
| Table S2: DEHP metabolite MEHP (Mono(2-ethylhexyl) phthalate) in microg/L.....                                                                     | 9  |
| Table S3: DEHP metabolite 5OH-MEHP (Mono(2-ethyl-5-hydroxy- hexyl) phthalate) in microg/L.....                                                     | 12 |
| Table S4: DEHP metabolite 5oxo-MEHP (Mono(2-ethyl-5-oxo-hexyl) phthalate) in microg/L.....                                                         | 15 |
| Table S5: DEHP metabolite 5cx-MEPP (Mono(2-ethyl-5-carboxy- pentyl) phthalate) in microg/L.....                                                    | 19 |
| Table S6: DnBP metabolite MnBP (Mono-n-butyl phthalate) in microg/L.....                                                                           | 21 |
| Table S7: DnBP metabolite OH-MnBP (3-OH-Mono-n-butyl phthalate) in microg/L .....                                                                  | 23 |
| Table S8: DiBP metabolite MiBP (Mono-isobutyl phthalate) in microg/L.....                                                                          | 25 |
| Table S9: DiBP metabolite OH-MiBP (2-OH-Mono-iso- butylphthalate) in microg/L.....                                                                 | 27 |
| Table S10: DEP metabolite MEP (Mono-ethyl phthalate) in microg/L .....                                                                             | 29 |
| Table S11: DMP metabolite MMP (Mono-methyl phthalate) in microg/L .....                                                                            | 31 |
| Table S12: Metabolite 3cx-MPP (3-carboxyl-mono-propyl phthalate) in microg/L .....                                                                 | 33 |
| Table S13: DiNP metabolite cx-MiNP (7-Carboxy-(mono-methyl- heptyl) phthalate) in microg/L .....                                                   | 35 |
| Table S14: DiNP metabolite OH-MiNP (7-OH-(Mono-methyl-octyl) phthalate) in microg/L .....                                                          | 37 |
| Table S15: DiNP metabolite oxo-MiNP (7-Oxo-(Mono-methyl-octyl) phthalate) in microg/L.....                                                         | 39 |
| Table S16: DiNP metabolite MiNP (Mono-methyl-octyl phthalate) in microg/L.....                                                                     | 41 |
| Table S17: DiDP metabolite cx-MiDP (Mono(2,7-methyl-7- carboxy-heptyl) phthalate) in microg/L ...                                                  | 43 |
| Table S18: DiDP metabolite OH-MiDP (6-OH-Mono-propyl-heptyl phthalate) in microg/L .....                                                           | 45 |
| Table S19: DiDP metabolite oxo-MiDP (6-Oxo-Mono-propyl-heptyl phthalate) in microg/L.....                                                          | 47 |
| Table S20: DINCH metabolite cx-MINCH (cyclohexane-1,2- dicarboxylate-mono-(7- carboxylate-4- methyl)heptyl ester) in microg/L .....                | 49 |
| Table S21: DINCH metabolite OH-MINCH (cyclohexane-1,2- dicarboxylate-mono-(7- hydroxy-4- methyl)octyl ester) in microg/L .....                     | 51 |
| Table S22: DINCH metabolite oxo-MINCH (cyclohexane-1,2- dicarboxylate-mono-(7-oxo- 4- methyl)octyl ester) in microg/L .....                        | 53 |
| Table S23: DEHTP metabolite 2cx-MMHTP (1-mono-(2-carboxyl-methyl-hexyl) benzene-1,4- dicarboxylate) in microg/L.....                               | 55 |
| Table S24: DEHTP metabolite 5cx-MEPTP (1-mono-(2-ethyl-5-carboxyl-pentyl) benzene-1,4- dicarboxylate) in microg/L.....                             | 55 |
| Table S25: DEHTP metabolite 5OH-MEHTP (1-mono-(2-ethyl-5-hydroxy-hexyl) benzene-1,4- dicarboxylate) in microg/L.....                               | 56 |
| Table S26: DEHTP metabolite 5oxo-MEHTP (1-mono-(2-ethyl-5-oxo-hexyl) benzene-1,4-dicarboxylate) in microg/L.....                                   | 56 |
| Figure S1. BBzP metabolite MBzP (Mono-benzyl phthalate) concentration in µg/L stratified by sampling year in boxplots.....                         | 57 |
| Figure S2. BBzP metabolite MBzP (Mono-benzyl phthalate) concentration in µg/L stratified by age groups in boxplots. ....                           | 58 |
| Figure S3. DEHP metabolite 5OH-MEHP (Mono(2-ethyl-5-hydroxy- hexyl) phthalate) concentration in µg/L stratified by sampling year in boxplots. .... | 60 |

|                                                                                                                                                     |    |
|-----------------------------------------------------------------------------------------------------------------------------------------------------|----|
| Figure S4. DEHP metabolite 5OH-MEHP (Mono(2-ethyl-5-hydroxy- hexyl) phthalate) concentration in µg/L stratified by age groups in boxplots. ....     | 61 |
| Figure S5. DEHP metabolite 5oxo-MEHP (Mono(2-ethyl-5-oxo-hexyl) phthalate) concentration in µg/L stratified by region in boxplots. ....             | 63 |
| Figure S6. DEHP metabolite 5oxo-MEHP (Mono(2-ethyl-5-oxo-hexyl) phthalate) concentration in µg/L stratified by sampling year in boxplots. ....      | 64 |
| Figure S7. DEHP metabolite 5oxo-MEHP (Mono(2-ethyl-5-oxo-hexyl) phthalate) concentration in µg/L stratified by age groups in boxplots. ....         | 65 |
| Figure S8. DEHP metabolite 5cx-MEPP (Mono(2-ethyl-5-carboxy- pentyl) phthalate) concentration in µg/L stratified by region in boxplots. ....        | 67 |
| Figure S9. DEHP metabolite 5cx-MEPP (Mono(2-ethyl-5-carboxy- pentyl) phthalate) concentration in µg/L stratified by sampling year in boxplots. .... | 68 |
| Figure S10. DEHP metabolite 5cx-MEPP (Mono(2-ethyl-5-carboxy- pentyl) phthalate) concentration in µg/L stratified by age groups in boxplots. ....   | 69 |
| Figure S11. DEHP metabolite MEHP (Mono(2-ethylhexyl) phthalate) concentration in µg/L stratified by region in boxplots. ....                        | 71 |
| Figure S12. DEHP metabolite MEHP (Mono(2-ethylhexyl) phthalate) concentration in µg/L stratified by sampling year in boxplots. ....                 | 72 |
| Figure S13. DEHP metabolite MEHP (Mono(2-ethylhexyl) phthalate) concentration in µg/L stratified by age groups in boxplots. ....                    | 73 |
| Figure S14. DnBP metabolite MnBP (Mono-n-butyl phthalate) concentration in µg/L stratified by region in boxplots. ....                              | 75 |
| Figure S15. DnBP metabolite MnBP (Mono-n-butyl phthalate) concentration in µg/L stratified by sampling year in boxplots. ....                       | 76 |
| Figure S16. DnBP metabolite OH-MnBP (3-OH-Mono-n-butyl phthalate) concentration in µg/L stratified by region in boxplots. ....                      | 77 |
| Figure S17. DnBP metabolite OH-MnBP (3-OH-Mono-n-butyl phthalate) concentration in µg/L stratified by sampling year in boxplots. ....               | 78 |
| Figure S18. DnBP metabolite OH-MnBP (3-OH-Mono-n-butyl phthalate) concentration in µg/L stratified by age groups in boxplots. ....                  | 79 |
| Figure S19. DiBP metabolite MiBP (Mono-isobutyl phthalate) concentration in µg/L stratified by sampling year in boxplots. ....                      | 81 |
| Figure S20. DiBP metabolite MiBP (Mono-isobutyl phthalate) concentration in µg/L stratified by age groups in boxplots. ....                         | 82 |
| Figure S21. DiBP metabolite OH-MiBP (2-OH-Mono-iso- butylphthalate) concentration in µg/L stratified by region in boxplots. ....                    | 84 |
| Figure S22. DiBP metabolite OH-MiBP (2-OH-Mono-iso- butylphthalate) concentration in µg/L stratified by sampling year in boxplots. ....             | 85 |
| Figure S23. DiBP metabolite OH-MiBP (2-OH-Mono-iso- butylphthalate) concentration in µg/L stratified by age groups in boxplots. ....                | 86 |
| Figure S24. DEP metabolite MEP (Mono-ethyl phthalate) concentration in µg/L stratified by region in boxplots. ....                                  | 88 |
| Figure S25. DEP metabolite MEP (Mono-ethyl phthalate) concentration in µg/L stratified by sampling year in boxplots. ....                           | 89 |

|                                                                                                                                                        |     |
|--------------------------------------------------------------------------------------------------------------------------------------------------------|-----|
| Figure S26. DMP metabolite MMP (Mono-methyl phthalate) concentration in µg/L stratified by region in boxplots. ....                                    | 90  |
| Figure S27. DMP metabolite MMP (Mono-methyl phthalate) concentration in µg/L stratified by sampling year in boxplots. ....                             | 91  |
| Figure S28. DMP metabolite MMP (Mono-methyl phthalate) concentration in µg/L stratified by age groups in boxplots. ....                                | 92  |
| Figure S29. Metabolite 3cx-MPP (3-carboxyl-mono-propyl phthalate) concentration in µg/L stratified by region in boxplots. ....                         | 94  |
| Figure S30. Metabolite 3cx-MPP (3-carboxyl-mono-propyl phthalate) concentration in µg/L stratified by sampling year in boxplots. ....                  | 95  |
| Figure S31. Metabolite 3cx-MPP (3-carboxyl-mono-propyl phthalate) concentration in µg/L stratified by age groups in boxplots. ....                     | 96  |
| Figure S32. DiNP metabolite cx-MiNP (7-Carboxy-(mono-methyl- heptyl) phthalate) concentration in µg/L stratified by sampling year in boxplots. ....    | 98  |
| Figure S33. DiNP metabolite cx-MiNP (7-Carboxy-(mono-methyl- heptyl) phthalate) concentration in µg/L stratified by age groups in boxplots. ....       | 99  |
| Figure S34. DiNP metabolite OH-MiNP (7-OH-(Mono-methyl-octyl) phthalate) concentration in µg/L stratified by region in boxplots. ....                  | 101 |
| Figure S35. DiNP metabolite OH-MiNP (7-OH-(Mono-methyl-octyl) phthalate) concentration in µg/L stratified by sampling year in boxplots. ....           | 102 |
| Figure S36. DiNP metabolite OH-MiNP (7-OH-(Mono-methyl-octyl) phthalate) concentration in µg/L stratified by age groups in boxplots. ....              | 103 |
| Figure S37. DiNP metabolite oxo-MiNP (7-Oxo-(Mono-methyl-octyl) phthalate) concentration in µg/L stratified by region in boxplots. ....                | 105 |
| Figure S38. DiNP metabolite oxo-MiNP (7-Oxo-(Mono-methyl-octyl) phthalate) concentration in µg/L stratified by sampling year in boxplots. ....         | 106 |
| Figure S39. DiNP metabolite oxo-MiNP (7-Oxo-(Mono-methyl-octyl) phthalate) concentration in µg/L stratified by age groups in boxplots. ....            | 107 |
| Figure S40. DiDP metabolite cx-MiDP (Mono(2,7-methyl-7- carboxy-heptyl) phthalate) concentration in µg/L stratified by region in boxplots. ....        | 109 |
| Figure S41. DiDP metabolite cx-MiDP (Mono(2,7-methyl-7- carboxy-heptyl) phthalate) concentration in µg/L stratified by sampling year in boxplots. .... | 110 |
| Figure S42. DiDP metabolite OH-MiDP (6-OH-Mono-propyl-heptyl phthalate) concentration in µg/L stratified by region in boxplots. ....                   | 111 |
| Figure S43. DiDP metabolite OH-MiDP (6-OH-Mono-propyl-heptyl phthalate) concentration in µg/L stratified by sampling year in boxplots. ....            | 112 |
| Figure S44. DiDP metabolite OH-MiDP (6-OH-Mono-propyl-heptyl phthalate) concentration in µg/L stratified by age groups in boxplots. ....               | 113 |
| Figure S45. DiDP metabolite oxo-MiDP (6-Oxo-Mono-propyl-heptyl phthalate) concentration in µg/L stratified by region in boxplots. ....                 | 115 |
| Figure S46. DiDP metabolite oxo-MiDP (6-Oxo-Mono-propyl-heptyl phthalate) concentration in µg/L stratified by sampling year in boxplots. ....          | 116 |
| Figure S47. DiDP metabolite oxo-MiDP (6-Oxo-Mono-propyl-heptyl phthalate) concentration in µg/L stratified by age groups in boxplots. ....             | 117 |

|                                                                                                                                                                                        |     |
|----------------------------------------------------------------------------------------------------------------------------------------------------------------------------------------|-----|
| Figure S48. DINCH metabolite cx-MINCH (cyclohexane-1,2- dicarboxylate-mono-(7- carboxylate-4- methyl)heptyl ester) concentration in µg/L stratified by region in boxplots. ....        | 119 |
| Figure S49. DINCH metabolite cx-MINCH (cyclohexane-1,2- dicarboxylate-mono-(7- carboxylate-4- methyl)heptyl ester) concentration in µg/L stratified by sampling year in boxplots. .... | 120 |
| Figure S50. DINCH metabolite cx-MINCH (cyclohexane-1,2- dicarboxylate-mono-(7- carboxylate-4- methyl)heptyl ester) concentration in µg/L stratified by age groups in boxplots. ....    | 121 |
| Figure S51. DINCH metabolite OH-MINCH (cyclohexane-1,2- dicarboxylate-mono-(7- hydroxy-4- methyl)octyl ester) concentration in µg/L stratified by region in boxplots. ....             | 123 |
| Figure S52. DINCH metabolite OH-MINCH (cyclohexane-1,2- dicarboxylate-mono-(7- hydroxy-4- methyl)octyl ester) concentration in µg/L stratified by sampling year in boxplots. ....      | 124 |
| Figure S53. DINCH metabolite OH-MINCH (cyclohexane-1,2- dicarboxylate-mono-(7- hydroxy-4- methyl)octyl ester) concentration in µg/L stratified by age groups in boxplots. ....         | 125 |
| Figure S54. DINCH metabolite oxo-MINCH (cyclohexane-1,2- dicarboxylate-mono-(7-oxo- 4- methyl)octyl ester) concentration in µg/L stratified by region in boxplots. ....                | 127 |
| Figure S55. DINCH metabolite oxo-MINCH (cyclohexane-1,2- dicarboxylate-mono-(7-oxo- 4- methyl)octyl ester) concentration in µg/L stratified by sampling year in boxplots. ....         | 128 |
| Figure S56. DINCH metabolite oxo-MINCH (cyclohexane-1,2- dicarboxylate-mono-(7-oxo- 4- methyl)octyl ester) concentration in µg/L stratified by age groups in boxplots. ....            | 129 |

**Table S1: BBzP metabolite MBzP (Mono-benzyl phthalate) in microg/L**

| Age   | Matrix | Country | Data collection | Sampling year | Sex | N   | LOD  | LOQ  | % below limit | P50  | P50_95% CI  | P75  | P75_95% CI  | P90  | P90_95% CI  | P95  | P95_95% CI  | GM   | GM_95% CI    |
|-------|--------|---------|-----------------|---------------|-----|-----|------|------|---------------|------|-------------|------|-------------|------|-------------|------|-------------|------|--------------|
| 3-5   | mU     | DE      | GerES IV 2005   | 2005          | F,M | 50  |      | 0.25 | 0.00          | 24.8 | 16.7 - 30.8 | 46.6 | 30.5 - 52.5 | 55.0 | 50.2 - 91.7 | 66.0 |             | 21.8 | 17.2 - 27.6  |
| 3-5   | sU     | DK      | CPH-MC          | 2006          | F,M | 189 | 1.26 |      | 9.52          | 18.5 | 14.8 - 23.0 | 42.9 | 35.2 - 57.0 | 82.4 | 71.2 - 111  | 121  | 95.2 - 241  | 15.6 | 12.6 - 19.4  |
| 3-5   | mU     | DE      | GerES V         | 2015 - 2017   | F,M | 388 |      | 0.20 | 0.26          | 3.65 | 3.20 - 4.30 | 7.33 | 6.36 - 8.69 | 15.7 | 12.6 - 20.6 | 30.3 | 20.6 - 44.4 | 3.91 | 3.51 - 4.37  |
| 3-5   | sU     | SK      | Children cohort | 2015 - 2016   | F,M | 67  |      | 0.20 | 0.00          | 2.36 | 1.92 - 3.70 | 5.02 | 3.97 - 8.35 | 9.35 | 6.84 - 15.6 | 13.9 |             | 2.31 | 1.75 - 3.04  |
| 3-5   | mU     | CZ      | CzechHBM-CE     | 2016 - 2017   | F,M | 148 |      | 1.90 | 25.0          | 3.16 | 2.68 - 3.76 | 6.70 | 5.25 - 9.05 | 16.9 | 11.8 - 43.2 | 43.5 | 18.6 - 94.6 | 3.28 | 2.66 - 4.05  |
| 6-11  | mU     | DE      | GerES IV 2005   | 2005          | F,M | 102 |      | 0.25 | 0.00          | 19.8 | 16.9 - 24.5 | 36.7 | 26.7 - 51.6 | 66.3 | 54.4 - 88.6 | 88.2 | 69.8 - 112  | 20.1 | 16.9 - 23.9  |
| 6-11  | sU     | DK      | CPH-MC          | 2006 - 2007   | F,M | 659 | 1.26 |      | 15.5          | 13.7 | 12.0 - 15.7 | 31.2 | 28.1 - 35.9 | 59.7 | 52.9 - 67.1 | 93.3 | 73.7 - 111  | 10.7 | 9.52 - 12.0  |
| 6-11  | mU     | DK      | CPHPUB-Cross    | 2006 - 2008   | F,M | 913 | 1.14 |      | 0.00          | 50.3 | 46.2 - 54.0 | 87.1 | 83.2 - 93.8 | 151  | 132 - 161   | 220  | 187 - 258   | 50.8 | 48.0 - 53.8  |
| 6-11  | sU     | AT      | PBAT            | 2010 - 2012   | F,M | 165 | 0.59 | 1.18 | 23.6          | 2.69 | 2.35 - 3.34 | 7.04 | 5.35 - 9.30 | 14.2 | 11.1 - 23.8 | 28.7 | 16.3 - 40.5 | 2.99 | 2.49 - 3.59  |
| 6-11  | mU     | SE      | DEMOCOPHES-SE   | 2011 - 2012   | F,M | 98  |      | 0.30 | 0.00          | 22.1 | 17.7 - 24.8 | 36.2 | 28.1 - 41.2 | 56.8 | 42.8 - 81.8 | 80.2 | 58.9 - 118  | 19.7 | 16.6 - 23.3  |
| 6-11  | mU     | DK      | DEMOCOPHES-DK   | 2011          | F,M | 143 |      | 1.14 | 2.80          | 7.03 | 6.11 - 8.06 | 12.1 | 9.85 - 16.0 | 24.0 | 17.4 - 30.9 | 31.0 | 26.2 - 51.4 | 7.24 | 6.26 - 8.38  |
| 6-11  | mU     | ES      | DEMOCOPHES-ES   | 2011 - 2012   | F,M | 120 |      | 0.20 | 0.00          | 12.8 | 9.74 - 15.6 | 23.4 | 19.4 - 27.2 | 34.8 | 27.5 - 58.1 | 57.8 | 36.1 - 70.4 | 12.5 | 10.8 - 14.6  |
| 6-11  | mU     | SL      | DEMOCOPHES-SI   | 2011 - 2012   | F,M | 119 |      | 0.50 | 0.00          | 7.60 | 6.44 - 9.72 | 17.0 | 13.3 - 22.0 | 26.4 | 23.0 - 34.0 | 34.0 | 28.0 - 61.9 | 8.40 | 7.11 - 9.92  |
| 6-11  | mU     | LU      | DEMOCOPHES-LU   | 2011 - 2012   | F,M | 60  |      | 0.20 | 1.67          | 4.25 | 3.11 - 5.40 | 8.43 | 5.48 - 10.7 | 13.4 | 9.42 - 35.8 | 24.1 |             | 4.49 | 3.46 - 5.82  |
| 6-11  | mU     | DE      | DEMOCOPHES-DE   | 2011          | F,M | 119 |      | 0.20 | 0.00          | 6.01 | 4.76 - 7.18 | 11.0 | 8.78 - 13.7 | 21.7 | 15.0 - 44.9 | 34.2 | 23.8 - 234  | 6.43 | 5.27 - 7.85  |
| 6-11  | mU     | BE      | DEMOCOPHES-BE   | 2011 - 2012   | F,M | 129 |      | 0.20 | 0.00          | 8.40 | 6.80 - 10.0 | 14.0 | 12.4 - 20.6 | 26.2 | 21.6 - 34.7 | 34.2 | 27.8 - 100  | 8.44 | 7.15 - 9.97  |
| 6-11  | mU     | HU      | DEMOCOPHES-HU   | 2011 - 2012   | F,M | 120 |      | 1.20 | 2.50          | 7.37 | 5.44 - 8.68 | 13.2 | 10.3 - 16.5 | 24.3 | 17.7 - 44.0 | 44.0 | 25.0 - 264  | 7.33 | 6.01 - 8.95  |
| 6-11  | mU     | PL      | DEMOCOPHES-PL   | 2011 - 2012   | F,M | 120 |      | 0.50 | 0.83          | 9.75 | 7.26 - 12.0 | 17.2 | 15.0 - 21.9 | 29.1 | 23.7 - 60.5 | 60.0 | 33.3 - 177  | 8.78 | 7.14 - 10.8  |
| 6-11  | mU     | CZ      | DEMOCOPHES-CZ   | 2011 - 2012   | F,M | 120 |      | 1.20 | 0.00          | 7.55 | 6.14 - 9.69 | 14.2 | 11.2 - 21.6 | 35.5 | 22.4 - 60.9 | 55.7 | 36.8 - 135  | 8.32 | 6.89 - 10.0  |
| 6-11  | mU     | SK      | DEMOCOPHES-SK   | 2011 - 2012   | F,M | 129 |      | 1.20 | 0.78          | 8.18 | 6.24 - 9.50 | 14.8 | 12.8 - 17.1 | 27.9 | 18.3 - 43.0 | 41.8 | 32.5 - 103  | 8.51 | 7.25 - 10.00 |
| 6-11  | mU     | NO      | IES             | 2012          | F,M | 50  | 0.07 | 0.20 | 0.00          | 6.94 | 5.40 - 7.80 | 9.43 | 7.79 - 12.6 | 18.4 | 10.3 - 24.7 | 20.0 |             | 6.41 | 5.27 - 7.80  |
| 6-11  | mU     | DE      | GerES V         | 2015 - 2017   | F,M | 937 |      | 0.20 | 0.32          | 3.10 | 2.90 - 3.20 | 5.70 | 5.20 - 6.10 | 11.3 | 9.98 - 14.5 | 18.7 | 16.8 - 25.6 | 3.32 | 3.11 - 3.54  |
| 6-11  | sU     | SK      | Children cohort | 2015 - 2016   | F,M | 112 |      | 0.20 | 0.00          | 3.00 | 2.19 - 4.04 | 6.18 | 4.88 - 8.19 | 11.0 | 8.32 - 21.5 | 17.8 | 11.3 - 71.1 | 2.94 | 2.34 - 3.68  |
| 6-11  | mU     | CZ      | CzechHBM-CE     | 2016 - 2017   | F,M | 223 |      | 1.90 | 30.0          | 3.22 | 2.69 - 3.90 | 6.87 | 6.26 - 9.91 | 19.9 | 13.1 - 27.1 | 29.1 | 24.5 - 61.8 | 3.33 | 2.82 - 3.94  |
| 12-19 | mU     | DE      | GerES IV 2005   | 2005          | F,M | 51  |      | 0.25 | 0.00          | 13.0 | 9.79 - 18.0 | 31.6 | 17.9 - 41.4 | 47.5 | 33.4 - 84.6 | 63.2 |             | 14.3 | 11.0 - 18.4  |
| 12-19 | mU     | DK      | CPHIPUB-Cross   | 2006 - 2008   | F,M | 389 | 1.14 |      | 0.00          | 46.2 | 41.1 - 49.9 | 83.2 | 73.6 - 93.3 | 138  | 111 - 161   | 182  | 160 - 244   | 45.0 | 41.2 - 49.1  |
| 12-19 | sU     | DK      | DYMS 2007       | 2007          | M   | 239 | 1.14 | 1.14 | 0.84          | 35.1 | 30.6 - 40.6 | 60.6 | 51.4 - 71.7 | 102  | 85.8 - 117  | 128  | 113 - 164   | 31.9 | 28.2 - 36.0  |
| 12-19 | sU     | DK      | DYMS 2008       | 2008          | M   | 261 | 1.14 | 1.14 | 0.38          | 31.5 | 29.5 - 37.8 | 58.8 | 52.1 - 71.2 | 116  | 87.7 - 142  | 163  | 129 - 228   | 32.0 | 28.2 - 36.4  |
| 12-19 | mU     | BE      | FLEHS2RefAdo    | 2008 - 2009   | F,M | 210 | 0.20 |      | 0.00          | 29.5 | 25.0 - 35.0 | 67.0 | 56.5 - 83.0 | 115  | 98.6 - 158  | 163  | 128 - 237   | 31.9 | 27.8 - 36.6  |
| 12-19 | sU     | DK      | DYMS 2009       | 2009          | M   | 210 | 0.03 | 0.03 | 0.48          | 18.7 | 16.9 - 22.5 | 40.8 | 33.9 - 49.2 | 80.4 | 57.8 - 130  | 145  | 89.8 - 352  | 19.7 | 16.8 - 23.2  |
| 12-19 | sU     | AT      | PBAT            | 2010 - 2012   | F,M | 94  | 0.59 | 1.18 | 23.4          | 2.66 | 2.23 - 3.62 | 6.98 | 4.74 - 10.6 | 12.8 | 10.7 - 19.0 | 17.5 | 13.5 - 39.8 | 2.99 | 2.38 - 3.76  |
| 12-19 | sU     | DK      | DYMS 2013       | 2013          | M   | 70  | 0.03 | 0.03 | 2.86          | 4.97 | 3.50 - 5.94 | 8.01 | 6.57 - 10.8 | 12.8 | 9.90 - 23.7 | 17.1 |             | 3.84 | 2.84 - 5.18  |
| 12-19 | sU     | BE      | FLEHS3RefAdo    | 2013          | F,M | 207 |      | 0.20 | 0.00          | 5.25 | 4.59 - 5.93 | 10.2 | 8.93 - 13.8 | 21.7 | 18.1 - 27.1 | 28.4 | 24.4 - 37.1 | 5.40 | 4.69 - 6.23  |
| 12-19 | mU     | DE      | GerES V         | 2015 - 2017   | F,M | 932 |      | 0.20 | 0.32          | 2.60 | 2.40 - 2.70 | 4.70 | 4.40 - 5.10 | 9.39 | 8.30 - 10.6 | 14.1 | 12.5 - 17.5 | 2.69 | 2.53 - 2.86  |

| Age   | Matrix | Country | Data collection | Sampling year | Sex | N   | LOD  | LOQ  | % below limit | P50  | P50_95% CI  | P75  | P75_95% CI  | P90  | P90_95% CI  | P95  | P95_95% CI  | GM   | GM_95% CI   |
|-------|--------|---------|-----------------|---------------|-----|-----|------|------|---------------|------|-------------|------|-------------|------|-------------|------|-------------|------|-------------|
| 12-19 | sU     | DK      | DYMS 2017       | 2017          | M   | 76  | 0.03 | 0.03 | 2.63          | 2.36 | 1.95 - 3.08 | 4.23 | 3.60 - 5.23 | 8.36 | 5.08 - 18.2 | 15.9 | 8.38 - 25.6 | 2.21 | 1.68 - 2.92 |
| 20-39 | 24hU   | DE      | ESB 2007        | 2007          | F,M | 60  |      | 0.20 | 0.00          | 2.85 | 2.40 - 3.70 | 5.50 | 3.78 - 8.47 | 12.7 | 7.17 - 27.1 | 16.9 |             | 3.28 | 2.57 - 4.20 |
| 20-39 | sU     | DK      | DYMS 2008       | 2008          | M   | 54  | 1.14 | 1.14 | 0.00          | 47.5 | 28.5 - 68.3 | 80.7 | 68.3 - 114  | 168  | 89.0 - 271  | 205  |             | 40.3 | 30.6 - 53.2 |
| 20-39 | mU     | BE      | FLEHS2RefAdult  | 2008 - 2009   | F,M | 189 | 0.20 |      | 0.53          | 21.0 | 17.6 - 25.4 | 36.0 | 32.0 - 44.0 | 67.0 | 54.2 - 89.2 | 93.0 | 71.0 - 158  | 18.5 | 15.7 - 21.8 |
| 20-39 | 24hU   | DE      | ESB 2008        | 2008          | F,M | 54  |      | 0.50 | 3.70          | 3.84 | 3.10 - 4.58 | 5.58 | 4.58 - 7.04 | 8.12 | 6.32 - 20.1 | 10.1 |             | 3.64 | 2.98 - 4.45 |
| 20-39 | sU     | DK      | DYMS 2009       | 2009          | M   | 79  | 0.03 | 0.03 | 0.00          | 19.4 | 14.3 - 28.5 | 41.1 | 35.3 - 55.7 | 70.0 | 55.1 - 99.3 | 92.2 | 70.3 - 482  | 19.5 | 15.3 - 24.7 |
| 20-39 | 24hU   | DE      | ESB 2009        | 2009          | F,M | 60  |      | 0.20 | 0.00          | 3.15 | 2.60 - 4.00 | 4.62 | 4.00 - 6.60 | 9.54 | 5.36 - 27.2 | 16.0 |             | 3.11 | 2.44 - 3.97 |
| 20-39 | sU     | AT      | PBAT            | 2010 - 2011   | F,M | 135 | 0.59 | 1.18 | 37.0          | 1.55 | 1.32 - 1.85 | 3.01 | 2.16 - 4.10 | 6.08 | 4.87 - 10.9 | 10.9 | 6.64 - 18.0 | 1.65 | 1.40 - 1.95 |
| 20-39 | mU     | SE      | DEMOCOPHES-SE   | 2011 - 2012   | F   | 50  |      | 0.30 | 0.00          | 18.0 | 10.2 - 21.5 | 33.1 | 21.1 - 67.8 | 85.0 | 55.0 - 209  | 108  |             | 15.9 | 11.1 - 22.6 |
| 20-39 | mU     | DK      | DEMOCOPHES-DK   | 2011          | F   | 51  |      | 1.14 | 5.88          | 4.96 | 3.66 - 6.68 | 11.0 | 6.54 - 17.0 | 19.2 | 14.2 - 24.5 | 22.8 |             | 5.08 | 3.91 - 6.62 |
| 20-39 | mU     | SL      | DEMOCOPHES-SI   | 2011 - 2012   | F   | 63  |      | 0.50 | 0.00          | 6.50 | 4.97 - 7.77 | 10.0 | 7.89 - 11.0 | 13.0 | 11.0 - 30.1 | 22.9 |             | 5.94 | 4.81 - 7.34 |
| 20-39 | mU     | DE      | DEMOCOPHES-DE   | 2011          | F   | 64  |      | 0.20 | 0.00          | 5.55 | 3.51 - 7.05 | 9.59 | 7.12 - 16.6 | 17.7 | 11.7 - 37.5 | 30.9 |             | 5.44 | 4.29 - 6.90 |
| 20-39 | mU     | BE      | DEMOCOPHES-BE   | 2011 - 2012   | F   | 62  |      | 0.20 | 0.00          | 5.95 | 4.38 - 8.02 | 11.5 | 8.25 - 14.0 | 16.7 | 13.3 - 39.6 | 19.9 |             | 5.90 | 4.63 - 7.53 |
| 20-39 | 24hU   | DE      | ESB 2011        | 2011          | F,M | 60  |      | 0.20 | 0.00          | 3.25 | 2.30 - 4.30 | 5.25 | 4.30 - 8.67 | 9.93 | 7.06 - 18.2 | 13.2 |             | 3.36 | 2.68 - 4.21 |
| 20-39 | mU     | HU      | DEMOCOPHES-HU   | 2011 - 2012   | F   | 89  |      | 1.20 | 4.49          | 4.77 | 3.83 - 5.69 | 9.04 | 6.57 - 11.6 | 16.1 | 11.6 - 24.6 | 22.3 | 17.8 - 55.8 | 5.06 | 4.20 - 6.09 |
| 20-39 | mU     | PL      | DEMOCOPHES-PL   | 2011 - 2012   | F   | 88  |      | 0.50 | 1.14          | 3.75 | 2.80 - 5.49 | 7.95 | 6.18 - 17.1 | 19.3 | 16.7 - 34.0 | 26.6 | 19.7 - 48.7 | 4.43 | 3.55 - 5.54 |
| 20-39 | mU     | CZ      | DEMOCOPHES-CZ   | 2011 - 2012   | F   | 88  |      | 1.20 | 10.2          | 3.65 | 2.72 - 5.51 | 8.28 | 6.53 - 11.4 | 17.1 | 11.3 - 124  | 37.8 | 17.9 - 507  | 4.48 | 3.40 - 5.91 |
| 20-39 | mU     | SK      | DEMOCOPHES-SK   | 2011 - 2012   | F   | 91  |      | 1.20 | 7.69          | 5.21 | 3.66 - 5.99 | 8.97 | 7.72 - 9.88 | 11.4 | 9.87 - 17.5 | 16.4 | 12.2 - 39.1 | 4.56 | 3.80 - 5.47 |
| 20-39 | sU     | IL      | IBS             | 2011          | F,M | 144 | 0.50 | 1.00 | 4.86          | 4.71 | 3.86 - 5.55 | 9.35 | 7.30 - 12.5 | 21.2 | 14.0 - 53.3 | 54.9 | 22.1 - 70.7 | 5.01 | 4.18 - 6.02 |
| 20-39 | 24hU   | DE      | ESB 2013        | 2013          | F,M | 60  |      | 0.20 | 0.00          | 2.00 | 1.70 - 2.60 | 3.50 | 2.68 - 4.50 | 5.37 | 4.40 - 20.7 | 12.8 |             | 2.31 | 1.88 - 2.85 |
| 20-39 | 24hU   | DE      | ESB 2015        | 2015          | F,M | 60  |      | 0.20 | 1.67          | 1.20 | 1.00 - 1.80 | 3.23 | 1.88 - 5.97 | 6.82 | 5.15 - 33.8 | 13.7 |             | 1.68 | 1.23 - 2.29 |
| 20-39 | sU     | CZ      | CzechHBM-AE     | 2018 - 2019   | F,M | 194 |      | 2.37 | 76.8          |      |             |      |             | 4.05 | 3.26 - 5.64 | 6.37 | 4.28 - 15.5 |      |             |
| 40-59 | sU     | AT      | PBAT            | 2010 - 2011   | F,M | 112 | 0.59 | 1.18 | 51.8          |      |             | 2.50 | 1.77 - 3.46 | 4.90 | 3.54 - 7.49 | 7.26 | 5.32 - 10.1 |      |             |
| 40-59 | mU     | DK      | DEMOCOPHES-DK   | 2011          | F   | 94  |      | 1.14 | 9.57          | 3.64 | 2.74 - 4.26 | 6.08 | 5.05 - 7.20 | 8.29 | 7.23 - 20.7 | 17.2 | 8.60 - 32.5 | 3.50 | 2.93 - 4.17 |
| 40-59 | mU     | ES      | DEMOCOPHES-ES   | 2011 - 2012   | F   | 75  |      | 0.20 | 0.00          | 9.80 | 7.19 - 11.7 | 17.1 | 13.0 - 22.0 | 27.4 | 19.8 - 46.6 | 41.9 | 27.4 - 82.3 | 8.66 | 6.84 - 11.0 |
| 40-59 | mU     | SL      | DEMOCOPHES-SI   | 2011 - 2012   | F   | 57  |      | 0.50 | 0.00          | 4.00 | 3.35 - 4.85 | 7.40 | 4.94 - 10.2 | 11.0 | 9.20 - 17.0 | 14.6 |             | 4.20 | 3.42 - 5.16 |
| 40-59 | mU     | DE      | DEMOCOPHES-DE   | 2011          | F   | 56  |      | 0.20 | 0.00          | 3.35 | 2.40 - 4.24 | 6.61 | 4.26 - 7.97 | 10.8 | 7.54 - 18.1 | 14.9 |             | 3.45 | 2.70 - 4.42 |
| 40-59 | mU     | BE      | DEMOCOPHES-BE   | 2011 - 2012   | F   | 67  |      | 0.20 | 0.00          | 6.50 | 5.23 - 8.19 | 12.0 | 8.46 - 15.0 | 17.4 | 15.0 - 26.3 | 23.7 |             | 6.77 | 5.60 - 8.17 |
| 40-59 | sU     | IL      | IBS             | 2011          | F,M | 86  | 0.50 | 1.00 | 13.9          | 3.96 | 2.77 - 5.16 | 8.21 | 6.62 - 11.9 | 18.4 | 11.8 - 26.0 | 25.0 | 18.9 - 192  | 4.21 | 3.30 - 5.38 |
| 40-59 | sU     | CZ      | CzechHBM-AE     | 2018 - 2019   | F,M | 192 |      | 2.37 | 77.1          |      |             |      |             | 4.43 | 3.25 - 7.29 | 7.43 | 5.05 - 9.97 |      |             |
| 60+   | sU     | AT      | PBAT            | 2010 - 2012   | F,M | 89  | 0.59 | 1.18 | 44.9          | 1.30 |             | 3.09 | 2.01 - 6.39 | 10.8 | 6.16 - 14.9 | 13.0 | 10.8 - 30.4 | 1.47 | 1.13 - 1.91 |

Notes. Matrix: mU - first morning urine, sU - spot urine, 24hU - 24-hours urine; country: AT - Austria, BE - Belgium, CZ - Czech Republic, DE - Germany, DK - Denmark, ES - Spain, HU - Hungary, IL - Israel, LU - Luxembourg, NO - Norway, PL - Poland, SE - Sweden, SI - Slovenia, SK - Slovakia; sex: F - female, M - male; n - sample size; LOD - limit of detection; LOQ - limit of quantification; % below limit - percentage of values below limit of detection/quantification, whichever was applied in the data collection; P50, P75, P90, P95 - 50th, 75th, 90th, 95th percentile; 95% CI - 95 % confidence interval; GM - geometric mean; NA - Not available.

| Age | Matrix | Country | Data collection | Sampling<br>year | Sex | N | LOD | LOQ | % below<br>limit | P50 | P50_95% CI | P75 | P75_95% CI | P90 | P90_95% CI | P95 | P95_95% CI | GM | GM_95% CI |
|-----|--------|---------|-----------------|------------------|-----|---|-----|-----|------------------|-----|------------|-----|------------|-----|------------|-----|------------|----|-----------|
|-----|--------|---------|-----------------|------------------|-----|---|-----|-----|------------------|-----|------------|-----|------------|-----|------------|-----|------------|----|-----------|

Data only displayed if n was at least 50; percentiles missing when below LOD/LOQ; CIs of the observed percentiles missing when they fall outside the observed range; GM was imputed (fixed imputation) based on a log-normal distribution when at least 50 % of values were above LOD/LOQ.

**Table S2: DEHP metabolite MEHP (Mono(2-ethylhexyl) phthalate) in microg/L**

| Age   | Matrix | Country | Data collection | Sampling year | Sex | N   | LOD  | LOQ  | % below limit | P50  | P50_95% CI  | P75  | P75_95% CI  | P90  | P90_95% CI  | P95  | P95_95% CI  | GM   | GM_95% CI   |
|-------|--------|---------|-----------------|---------------|-----|-----|------|------|---------------|------|-------------|------|-------------|------|-------------|------|-------------|------|-------------|
| 3-5   | mU     | DE      | GerES IV 2005   | 2005          | F,M | 50  |      | 0.25 | 0.00          | 4.87 | 3.80 - 6.61 | 7.67 | 6.49 - 10.7 | 13.4 | 8.13 - 39.3 | 25.9 |             | 4.76 | 3.71 - 6.11 |
| 3-5   | sU     | DK      | CPH-MC          | 2006          | F,M | 189 | 0.31 |      | 0.53          | 4.60 | 3.82 - 5.22 | 8.12 | 6.90 - 10.3 | 15.2 | 11.7 - 22.0 | 25.2 | 17.8 - 38.4 | 4.16 | 3.58 - 4.85 |
| 3-5   | mU     | DE      | GerES V         | 2015 - 2017   | F,M | 388 |      | 0.50 | 13.9          | 1.30 | 1.20 - 1.40 | 2.10 | 1.90 - 2.49 | 4.20 | 3.60 - 4.89 | 5.79 | 4.83 - 7.62 | 1.28 | 1.17 - 1.40 |
| 3-5   | sU     | SK      | Children cohort | 2015 - 2016   | F,M | 67  |      | 0.50 | 0.00          | 1.63 |             | 2.85 |             | 5.09 |             | 9.04 |             |      |             |
| 3-5   | mU     | CZ      | CzechHBM-CE     | 2016 - 2017   | F,M | 148 |      | 2.00 | 43.9          | 2.24 |             | 3.16 | 2.83 - 3.76 | 4.62 | 4.03 - 5.42 | 5.47 | 4.75 - 7.33 | 2.21 | 2.03 - 2.41 |
| 6-11  | mU     | DE      | GerES IV 2005   | 2005          | F,M | 102 |      | 0.25 | 0.00          | 6.72 | 5.72 - 8.01 | 9.77 | 8.66 - 11.4 | 16.1 | 11.9 - 23.5 | 21.6 | 17.0 - 39.8 | 6.16 | 5.24 - 7.23 |
| 6-11  | sU     | DK      | CPH-MC          | 2006 - 2007   | F,M | 659 | 0.31 |      | 1.06          | 4.20 | 3.85 - 4.54 | 7.46 | 6.89 - 8.12 | 12.3 | 11.3 - 13.7 | 18.6 | 15.0 - 22.1 | 4.00 | 3.72 - 4.31 |
| 6-11  | mU     | DK      | CPHPUB-Cross    | 2006 - 2008   | F,M | 913 | 0.14 |      | 0.00          | 5.03 | 4.73 - 5.33 | 8.28 | 7.84 - 9.08 | 13.5 | 12.6 - 14.2 | 16.9 | 15.4 - 20.7 | 4.99 | 4.74 - 5.26 |
| 6-11  | sU     | AT      | PBAT            | 2010 - 2012   | F,M | 165 | 0.69 | 1.38 | 61.2          |      |             | 2.41 | 1.94 - 2.85 | 4.82 | 3.34 - 7.02 | 7.08 | 5.82 - 10.7 |      |             |
| 6-11  | mU     | SE      | DEMOCOPHES-SE   | 2011 - 2012   | F,M | 98  |      | 0.30 | 1.02          | 2.83 | 1.99 - 3.23 | 5.06 | 3.69 - 6.52 | 7.99 | 6.53 - 12.9 | 12.3 | 8.18 - 19.9 | 2.71 | 2.28 - 3.22 |
| 6-11  | mU     | DK      | DEMOCOPHES-DK   | 2011          | F,M | 143 |      | 0.14 | 4.20          | 2.01 | 1.73 - 2.37 | 3.54 | 3.08 - 4.67 | 6.18 | 5.06 - 9.69 | 9.88 | 6.72 - 15.2 | 1.94 | 1.62 - 2.34 |
| 6-11  | mU     | ES      | DEMOCOPHES-ES   | 2011 - 2012   | F,M | 120 |      | 0.50 | 0.00          | 6.60 | 5.47 - 7.60 | 10.1 | 8.81 - 12.9 | 15.1 | 13.6 - 19.8 | 19.5 | 15.3 - 25.6 | 6.22 | 5.45 - 7.11 |
| 6-11  | mU     | SL      | DEMOCOPHES-SI   | 2011 - 2012   | F,M | 119 |      | 0.50 | 4.20          | 2.40 | 2.04 - 2.90 | 4.30 | 3.50 - 5.07 | 7.52 | 5.58 - 9.17 | 9.03 | 7.79 - 26.1 | 2.43 | 2.07 - 2.85 |
| 6-11  | mU     | LU      | DEMOCOPHES-LU   | 2011 - 2012   | F,M | 60  |      | 0.50 | 8.33          | 1.70 | 1.30 - 2.00 | 2.38 | 2.00 - 3.47 | 4.00 | 2.99 - 4.86 | 4.71 |             | 1.55 | 1.29 - 1.86 |
| 6-11  | mU     | DE      | DEMOCOPHES-DE   | 2011          | F,M | 119 |      | 0.50 | 6.72          | 2.32 | 1.92 - 2.90 | 4.59 | 3.61 - 5.84 | 7.17 | 6.00 - 8.97 | 8.58 | 7.30 - 31.6 | 2.41 | 2.04 - 2.85 |
| 6-11  | mU     | BE      | DEMOCOPHES-BE   | 2011 - 2012   | F,M | 129 |      | 0.50 | 6.20          | 2.10 | 1.80 - 2.60 | 3.60 | 3.04 - 4.80 | 8.38 | 5.11 - 13.0 | 13.0 | 8.94 - 21.5 | 2.27 | 1.93 - 2.67 |
| 6-11  | mU     | HU      | DEMOCOPHES-HU   | 2011 - 2012   | F,M | 120 |      | 2.00 | 25.8          | 3.59 | 3.21 - 4.35 | 6.54 | 5.41 - 8.37 | 11.4 | 8.55 - 23.2 | 22.2 | 11.8 - 39.0 | 3.59 | 3.02 - 4.28 |
| 6-11  | mU     | PL      | DEMOCOPHES-PL   | 2011 - 2012   | F,M | 120 |      | 0.50 | 2.50          | 3.65 | 3.10 - 4.50 | 6.00 | 5.20 - 7.94 | 8.50 | 8.10 - 12.5 | 11.2 | 8.70 - 15.7 | 3.45 | 2.98 - 4.00 |
| 6-11  | mU     | CZ      | DEMOCOPHES-CZ   | 2011 - 2012   | F,M | 120 |      | 2.00 | 27.5          | 3.57 | 2.64 - 3.94 | 5.56 | 4.44 - 7.15 | 8.77 | 7.52 - 11.0 | 11.0 | 9.06 - 19.7 | 3.35 | 2.94 - 3.83 |
| 6-11  | mU     | SK      | DEMOCOPHES-SK   | 2011 - 2012   | F,M | 129 |      | 2.00 | 21.7          | 4.20 | 3.59 - 5.15 | 7.85 | 6.50 - 9.51 | 14.0 | 11.2 - 18.8 | 18.6 | 14.4 - 26.6 | 4.17 | 3.58 - 4.86 |
| 6-11  | mU     | SK      | PCBcohort_c     | 2014 - 2016   | F,M | 249 | 0.33 |      | 0.00          | 4.36 | 3.73 - 5.09 | 7.77 | 6.81 - 9.19 | 13.4 | 12.1 - 15.9 | 18.0 | 14.8 - 23.8 | 3.94 | 3.46 - 4.48 |
| 6-11  | mU     | DE      | GerES V         | 2015 - 2017   | F,M | 937 |      | 0.50 | 14.3          | 1.40 | 1.30 - 1.50 | 2.50 | 2.40 - 2.70 | 4.34 | 3.80 - 4.94 | 6.00 | 5.51 - 7.53 | 1.39 | 1.31 - 1.47 |
| 6-11  | sU     | SK      | Children cohort | 2015 - 2016   | F,M | 112 |      | 0.50 | 0.00          | 2.46 | 1.83 - 3.13 | 5.17 | 3.89 - 6.77 | 10.7 | 7.92 - 11.9 | 11.8 | 10.7 - 21.8 | 2.53 | 2.10 - 3.05 |
| 6-11  | mU     | CZ      | CzechHBM-CE     | 2016 - 2017   | F,M | 223 |      | 2.00 | 33.2          | 2.55 | 2.24 - 2.85 | 4.27 | 3.81 - 4.76 | 6.38 | 5.45 - 7.57 | 8.03 | 6.90 - 9.83 | 2.62 | 2.40 - 2.85 |
| 12-19 | mU     | DE      | GerES IV 2005   | 2005          | F,M | 51  |      | 0.25 | 1.96          | 6.75 | 5.44 - 7.06 | 8.21 | 7.05 - 12.0 | 12.8 | 10.0 - 46.7 | 17.6 |             | 6.68 | 5.46 - 8.18 |
| 12-19 | mU     | DK      | CPHPUB-Cross    | 2006 - 2008   | F,M | 389 | 0.14 |      | 0.00          | 4.54 | 4.17 - 4.96 | 7.46 | 6.71 - 8.62 | 13.6 | 11.7 - 15.9 | 17.7 | 15.9 - 26.3 | 4.59 | 4.21 - 5.02 |
| 12-19 | sU     | DK      | DYMS 2007       | 2007          | M   | 239 | 0.14 | 0.14 | 0.84          | 4.48 | 3.84 - 4.99 | 8.25 | 6.90 - 10.1 | 13.7 | 11.6 - 18.1 | 19.4 | 16.8 - 27.7 | 4.22 | 3.71 - 4.80 |
| 12-19 | sU     | DK      | DYMS 2008       | 2008          | M   | 261 | 0.14 | 0.14 | 0.77          | 3.91 | 3.40 - 4.28 | 6.29 | 5.65 - 7.47 | 11.3 | 9.51 - 15.3 | 17.6 | 13.1 - 42.0 | 3.62 | 3.17 - 4.14 |
| 12-19 | mU     | BE      | FLEHS2RefAdo    | 2008 - 2009   | F,M | 210 | 1.00 |      | 9.52          | 3.75 | 3.24 - 4.36 | 5.90 | 5.30 - 7.60 | 10.0 | 9.10 - 14.6 | 17.0 | 12.4 - 27.8 | 3.66 | 3.23 - 4.15 |
| 12-19 | sU     | DK      | DYMS 2009       | 2009          | M   | 210 | 0.07 | 0.07 | 0.48          | 2.71 | 2.34 - 3.25 | 5.60 | 4.57 - 6.28 | 7.90 | 7.23 - 10.5 | 12.0 | 9.43 - 15.9 | 2.63 | 2.29 - 3.02 |
| 12-19 | sU     | AT      | PBAT            | 2010 - 2012   | F,M | 94  | 0.69 | 1.38 | 51.1          |      |             | 3.35 | 2.23 - 4.49 | 4.74 | 4.49 - 10.8 | 8.97 | 4.94 - 14.6 |      |             |
| 12-19 | sU     | DK      | DYMS 2013       | 2013          | M   | 70  | 0.07 | 0.07 | 1.43          | 1.90 | 1.36 - 2.46 | 3.18 | 2.63 - 3.83 | 4.04 | 3.66 - 8.78 | 6.00 |             | 1.67 | 1.31 - 2.12 |
| 12-19 | sU     | BE      | FLEHS3RefAdo    | 2013          | F,M | 207 |      | 0.50 | 3.86          | 2.02 | 1.78 - 2.34 | 3.80 | 3.16 - 4.49 | 6.30 | 5.51 - 8.06 | 8.66 | 7.42 - 11.9 | 2.09 | 1.86 - 2.35 |
| 12-19 | mU     | DE      | GerES V         | 2015 - 2017   | F,M | 932 |      | 0.50 | 13.8          | 1.50 | 1.40 - 1.60 | 2.73 | 2.54 - 2.90 | 4.39 | 4.00 - 4.90 | 6.34 | 5.44 - 7.30 | 1.45 | 1.37 - 1.54 |

| Age   | Matrix | Country | Data collection | Sampling year | Sex | N   | LOD  | LOQ  | % below limit | P50  | P50_95% CI  | P75  | P75_95% CI  | P90  | P90_95% CI  | P95  | P95_95% CI  | GM   | GM_95% CI   |
|-------|--------|---------|-----------------|---------------|-----|-----|------|------|---------------|------|-------------|------|-------------|------|-------------|------|-------------|------|-------------|
| 12-19 | mU     | SK      | PCBcohort_t     | 2015 - 2017   | F,M | 65  | 0.33 |      | 13.8          | 3.57 | 1.87 - 4.85 | 6.16 | 5.06 - 7.90 | 9.12 | 7.37 - 14.8 | 13.0 |             | 2.39 | 1.75 - 3.27 |
| 12-19 | sU     | DK      | DYMS 2017       | 2017          | M   | 76  | 0.07 | 0.07 | 3.95          | 0.94 | 0.79 - 1.21 | 1.71 | 1.28 - 2.24 | 2.99 | 2.19 - 5.71 | 4.74 | 3.01 - 9.79 | 0.90 | 0.70 - 1.14 |
| 20-39 | 24hU   | DE      | ESB 2007        | 2007          | F,M | 60  |      | 0.50 | 0.00          | 3.60 | 3.10 - 5.49 | 8.25 | 5.89 - 10.8 | 13.3 | 8.70 - 28.9 | 23.0 |             | 4.34 | 3.45 - 5.46 |
| 20-39 | sU     | DK      | DYMS 2008       | 2008          | M   | 54  | 0.14 | 0.14 | 0.00          | 4.79 | 3.97 - 6.13 | 8.23 | 6.15 - 12.3 | 14.3 | 10.2 - 17.2 | 15.9 |             | 4.69 | 3.71 - 5.92 |
| 20-39 | mU     | BE      | FLEHS2RefAdult  | 2008 - 2009   | F,M | 189 | 1.00 |      | 14.8          | 2.70 | 2.30 - 3.40 | 5.20 | 4.50 - 6.92 | 9.30 | 7.90 - 13.9 | 14.0 | 10.8 - 23.3 | 2.76 | 2.38 - 3.19 |
| 20-39 | 24hU   | DE      | ESB 2008        | 2008          | F,M | 54  |      | 0.50 | 7.41          | 3.29 | 2.85 - 4.08 | 4.72 | 4.09 - 6.54 | 6.95 | 5.76 - 13.1 | 12.3 |             | 3.13 | 2.51 - 3.90 |
| 20-39 | sU     | DK      | DYMS 2009       | 2009          | M   | 79  | 0.07 | 0.07 | 1.27          | 3.28 | 2.90 - 4.59 | 6.18 | 4.91 - 8.05 | 10.4 | 7.48 - 15.1 | 14.2 | 10.4 - 142  | 3.24 | 2.54 - 4.13 |
| 20-39 | 24hU   | DE      | ESB 2009        | 2009          | F,M | 60  |      | 0.50 | 0.00          | 3.35 | 2.60 - 4.20 | 4.72 | 4.20 - 6.79 | 8.12 | 6.09 - 19.1 | 10.8 |             | 3.58 | 3.02 - 4.23 |
| 20-39 | sU     | AT      | PBAT            | 2010 - 2011   | F,M | 135 | 0.69 | 1.38 | 79.3          |      |             |      |             | 2.54 | 1.72 - 3.49 | 3.48 | 2.65 - 7.94 |      |             |
| 20-39 | mU     | SE      | DEMOCOPHES-SE   | 2011 - 2012   | F   | 50  |      | 0.30 | 4.00          | 3.10 | 2.06 - 4.07 | 5.14 | 4.05 - 6.47 | 7.06 | 6.16 - 38.2 | 18.6 |             | 2.68 | 1.97 - 3.65 |
| 20-39 | mU     | DK      | DEMOCOPHES-DK   | 2011          | F   | 51  |      | 0.14 | 11.8          | 1.79 | 1.27 - 2.43 | 3.00 | 2.37 - 4.44 | 4.83 | 3.44 - 10.5 | 6.62 |             | 1.42 | 1.01 - 1.98 |
| 20-39 | mU     | SL      | DEMOCOPHES-SI   | 2011 - 2012   | F   | 63  |      | 0.50 | 3.17          | 4.80 | 3.20 - 6.57 | 8.15 | 6.60 - 15.1 | 21.8 | 12.2 - 33.3 | 26.0 |             | 4.44 | 3.35 - 5.87 |
| 20-39 | mU     | DE      | DEMOCOPHES-DE   | 2011          | F   | 64  |      | 0.50 | 15.6          | 3.18 | 2.44 - 4.12 | 5.55 | 4.26 - 7.75 | 9.16 | 7.02 - 20.4 | 17.8 |             | 2.69 | 1.99 - 3.62 |
| 20-39 | mU     | BE      | DEMOCOPHES-BE   | 2011 - 2012   | F   | 62  |      | 0.50 | 9.68          | 2.05 | 1.38 - 2.81 | 4.22 | 2.99 - 5.23 | 7.62 | 4.90 - 24.5 | 11.9 |             | 2.05 | 1.54 - 2.72 |
| 20-39 | 24hU   | DE      | ESB 2011        | 2011          | F,M | 60  |      | 0.50 | 3.33          | 1.80 | 1.40 - 2.10 | 2.58 | 2.10 - 3.47 | 3.85 | 3.16 - 5.68 | 4.82 |             | 1.69 | 1.43 - 2.00 |
| 20-39 | mU     | HU      | DEMOCOPHES-HU   | 2011 - 2012   | F   | 89  |      | 2.00 | 22.5          | 4.61 | 3.18 - 5.33 | 7.45 | 5.69 - 10.6 | 13.6 | 10.6 - 19.8 | 18.6 | 13.8 - 56.8 | 4.13 | 3.40 - 5.02 |
| 20-39 | mU     | PL      | DEMOCOPHES-PL   | 2011 - 2012   | F   | 88  |      | 0.50 | 1.14          | 4.85 | 3.44 - 5.98 | 8.22 | 6.91 - 12.1 | 14.0 | 12.0 - 40.5 | 25.8 | 14.0 - 57.1 | 4.54 | 3.68 - 5.61 |
| 20-39 | mU     | CZ      | DEMOCOPHES-CZ   | 2011 - 2012   | F   | 88  |      | 2.00 | 23.9          | 3.48 | 2.96 - 4.19 | 6.03 | 4.33 - 7.18 | 7.83 | 7.10 - 13.2 | 12.4 | 7.86 - 14.2 | 3.41 | 2.95 - 3.95 |
| 20-39 | mU     | SK      | DEMOCOPHES-SK   | 2011 - 2012   | F   | 91  |      | 2.00 | 19.8          | 4.06 | 3.16 - 4.94 | 7.04 | 5.80 - 9.31 | 13.5 | 9.26 - 18.9 | 17.8 | 13.6 - 33.6 | 4.14 | 3.47 - 4.94 |
| 20-39 | sU     | IL      | IBS             | 2011          | F,M | 144 | 0.25 | 0.50 | 0.00          | 12.3 | 10.4 - 15.7 | 25.3 | 19.5 - 37.7 | 51.0 | 44.9 - 60.9 | 61.2 | 52.4 - 239  | 13.7 | 11.4 - 16.4 |
| 20-39 | 24hU   | DE      | ESB 2013        | 2013          | F,M | 60  |      | 0.50 | 5.00          | 1.35 | 1.30 - 1.80 | 2.30 | 1.88 - 3.30 | 3.33 | 2.80 - 4.93 | 4.42 |             | 1.45 | 1.21 - 1.73 |
| 20-39 | 24hU   | DE      | ESB 2015        | 2015          | F,M | 60  |      | 0.50 | 10.0          | 1.10 | 1.00 - 1.20 | 1.92 | 1.36 - 2.81 | 3.21 | 2.36 - 8.16 | 4.42 |             | 1.22 | 1.00 - 1.49 |
| 20-39 | sU     | CZ      | CzechHBM-AE     | 2018 - 2019   | F,M | 194 |      | 0.61 | 3.09          | 1.89 | 1.67 - 2.29 | 3.27 | 2.99 - 4.01 | 5.66 | 4.55 - 9.46 | 11.5 | 7.05 - 24.0 | 2.15 | 1.90 - 2.44 |
| 40-59 | sU     | AT      | PBAT            | 2010 - 2011   | F,M | 112 | 0.69 | 1.38 | 80.4          |      |             |      |             | 2.19 | 1.77 - 3.36 | 3.14 | 2.22 - 5.72 |      |             |
| 40-59 | mU     | DK      | DEMOCOPHES-DK   | 2011          | F   | 94  |      | 0.14 | 7.45          | 1.56 | 1.24 - 2.28 | 3.48 | 2.94 - 4.51 | 5.58 | 4.53 - 7.58 | 6.84 | 5.69 - 153  | 1.59 | 1.23 - 2.06 |
| 40-59 | mU     | ES      | DEMOCOPHES-ES   | 2011 - 2012   | F   | 75  |      | 0.50 | 1.33          | 6.30 | 5.30 - 7.80 | 13.9 | 8.80 - 18.6 | 21.4 | 17.7 - 28.0 | 25.8 | 21.5 - 35.7 | 6.97 | 5.76 - 8.44 |
| 40-59 | mU     | SL      | DEMOCOPHES-SI   | 2011 - 2012   | F   | 57  |      | 0.50 | 3.51          | 2.80 | 2.25 - 3.81 | 5.30 | 3.98 - 8.24 | 9.74 | 6.15 - 13.3 | 10.2 |             | 2.90 | 2.29 - 3.66 |
| 40-59 | mU     | DE      | DEMOCOPHES-DE   | 2011          | F   | 56  |      | 0.50 | 19.6          | 1.45 | 1.01 - 2.25 | 3.53 | 2.28 - 5.05 | 5.62 | 4.38 - 12.1 | 9.32 |             | 1.48 | 1.10 - 2.00 |
| 40-59 | mU     | BE      | DEMOCOPHES-BE   | 2011 - 2012   | F   | 67  |      | 0.50 | 5.97          | 2.40 | 2.01 - 2.70 | 4.20 | 2.93 - 5.13 | 7.04 | 4.93 - 8.33 | 7.88 |             | 2.27 | 1.86 - 2.77 |
| 40-59 | sU     | IL      | IBS             | 2011          | F,M | 86  | 0.25 | 0.50 | 0.00          | 10.6 | 8.24 - 12.5 | 25.1 | 15.2 - 33.2 | 41.5 | 32.6 - 66.8 | 62.1 | 43.5 - 193  | 10.3 | 8.02 - 13.2 |
| 40-59 | sU     | CZ      | CzechHBM-AE     | 2018 - 2019   | F,M | 192 |      | 0.61 | 2.08          | 1.97 | 1.78 - 2.39 | 3.46 | 2.87 - 4.48 | 7.46 | 5.37 - 15.3 | 20.8 | 11.8 - 37.9 | 2.36 | 2.04 - 2.72 |
| 6-59  | mU     | AT      | IC-HBM          | 2009          | F   | 50  | 0.22 | 0.81 | 36.0          | 1.20 | 0.32 - 1.43 | 2.38 | 1.40 - 3.58 | 4.04 | 3.10 - 10.3 | 5.38 |             | 1.15 | 0.86 - 1.55 |
| 60+   | sU     | AT      | PBAT            | 2010 - 2012   | F,M | 89  | 0.69 | 1.38 | 79.8          |      |             |      |             | 3.41 | 1.60 - 6.30 | 5.86 | 3.51 - 10.6 |      |             |

Notes. Matrix: mU - first morning urine, sU - spot urine, 24hU - 24-hours urine; country: AT - Austria, BE - Belgium, CZ - Czech Republic, DE - Germany, DK - Denmark, ES - Spain, HU - Hungary, IL - Israel, LU - Luxemburg, NO - Norway, PL - Poland, SE - Sweden, SI - Slovenia, SK - Slovakia; sex: F - female, M - male; n - sample size; LOD - limit of detection; LOQ - limit of quantification; %

| Age | Matrix | Country | Data collection | Sampling<br>year | Sex | N | LOD | LOQ | % below<br>limit | P50 | P50_95% CI | P75 | P75_95% CI | P90 | P90_95% CI | P95 | P95_95% CI | GM | GM_95% CI |
|-----|--------|---------|-----------------|------------------|-----|---|-----|-----|------------------|-----|------------|-----|------------|-----|------------|-----|------------|----|-----------|
|-----|--------|---------|-----------------|------------------|-----|---|-----|-----|------------------|-----|------------|-----|------------|-----|------------|-----|------------|----|-----------|

below limit - percentage of values below limit of detection/quantification, whichever was applied in the data collection; P50, P75, P90, P95 - 50th, 75th, 90th, 95th percentile; 95% CI - 95 % confidence interval; GM - geometric mean; NA - Not available.

Data only displayed if n was at least 50; percentiles missing when below LOD/LOQ; CIs of the observed percentiles missing when they fall outside the observed range; GM was imputed (fixed imputation) based on a log-normal distribution when at least 50 % of values were above LOD/LOQ.

**Table S3: DEHP metabolite 5OH-MEHP (Mono(2-ethyl-5-hydroxy- hexyl) phthalate) in microg/L**

| Age   | Matrix | Country | Data collection | Sampling year | Sex | N   | LOD  | LOQ  | % below limit | P50  | P50_95% CI  | P75  | P75_95% CI  | P90  | P90_95% CI  | P95  | P95_95% CI  | GM   | GM_95% CI   |
|-------|--------|---------|-----------------|---------------|-----|-----|------|------|---------------|------|-------------|------|-------------|------|-------------|------|-------------|------|-------------|
| 3-5   | mU     | DE      | GerES IV 2005   | 2005          | F,M | 50  |      | 0.25 | 0.00          | 57.6 | 43.8 - 69.1 | 78.3 | 67.4 - 103  | 123  | 86.6 - 273  | 181  |             | 51.0 | 40.9 - 63.6 |
| 3-5   | sU     | DK      | CPH-MC          | 2006          | F,M | 189 | 0.60 |      | 0.00          | 35.8 | 28.2 - 43.1 | 62.8 | 52.6 - 74.6 | 105  | 91.9 - 128  | 134  | 116 - 390   | 31.8 | 27.3 - 37.1 |
| 3-5   | mU     | DE      | GerES V         | 2015 - 2017   | F,M | 388 |      | 0.20 | 0.00          | 13.6 | 12.4 - 15.0 | 22.9 | 21.1 - 25.5 | 40.2 | 34.8 - 48.7 | 55.0 | 48.5 - 62.7 | 14.2 | 13.2 - 15.3 |
| 3-5   | sU     | SK      | Children cohort | 2015 - 2016   | F,M | 67  |      | 0.20 | 0.00          | 18.3 | 14.4 - 21.0 | 27.3 | 21.9 - 34.9 | 41.5 | 33.6 - 79.0 | 63.8 |             | 16.0 | 13.0 - 19.8 |
| 3-5   | mU     | CZ      | CzechHBM-CE     | 2016 - 2017   | F,M | 148 |      | 1.50 | 0.00          | 21.0 | 19.2 - 22.5 | 35.0 | 29.4 - 38.0 | 52.8 | 41.4 - 66.1 | 66.4 | 56.5 - 111  | 21.0 | 18.7 - 23.6 |
| 6-11  | mU     | DE      | GerES IV 2005   | 2005          | F,M | 102 |      | 0.25 | 0.00          | 48.0 | 42.2 - 52.4 | 75.6 | 61.0 - 95.9 | 122  | 99.9 - 143  | 133  | 122 - 250   | 48.2 | 42.1 - 55.1 |
| 6-11  | sU     | DK      | CPH-MC          | 2006 - 2007   | F,M | 659 | 0.60 |      | 0.00          | 33.7 | 30.7 - 37.2 | 58.6 | 54.6 - 65.2 | 97.6 | 88.0 - 112  | 135  | 117 - 154   | 30.8 | 28.5 - 33.3 |
| 6-11  | mU     | DK      | CPHPUB-Cross    | 2006 - 2008   | F,M | 913 | 0.91 |      | 0.00          | 49.7 | 47.3 - 52.0 | 76.9 | 73.7 - 81.2 | 113  | 106 - 124   | 165  | 146 - 194   | 50.2 | 48.0 - 52.6 |
| 6-11  | sU     | AT      | PBAT            | 2010 - 2012   | F,M | 165 | 0.79 | 1.58 | 12.7          | 5.15 | 3.37 - 6.64 | 11.3 | 8.92 - 16.0 | 23.2 | 18.6 - 27.2 | 27.5 | 24.7 - 36.5 | 5.23 | 4.46 - 6.12 |
| 6-11  | mU     | SE      | DEMOCOPHES-SE   | 2011 - 2012   | F,M | 98  |      | 0.30 | 0.00          | 24.2 | 20.5 - 28.0 | 36.2 | 30.6 - 47.0 | 53.9 | 47.7 - 125  | 111  | 54.7 - 145  | 24.1 | 20.9 - 27.9 |
| 6-11  | mU     | DK      | DEMOCOPHES-DK   | 2011          | F,M | 143 |      | 0.91 | 0.00          | 22.8 | 20.5 - 28.6 | 36.6 | 31.5 - 41.3 | 49.8 | 43.7 - 88.5 | 88.6 | 50.5 - 133  | 23.3 | 20.6 - 26.4 |
| 6-11  | mU     | ES      | DEMOCOPHES-ES   | 2011 - 2012   | F,M | 120 |      | 0.20 | 0.00          | 32.9 | 28.3 - 40.5 | 56.5 | 50.2 - 66.8 | 93.3 | 73.7 - 132  | 132  | 94.3 - 162  | 34.8 | 30.6 - 39.6 |
| 6-11  | mU     | SL      | DEMOCOPHES-SI   | 2011 - 2012   | F,M | 119 |      | 0.50 | 0.00          | 29.0 | 23.0 - 35.2 | 46.5 | 41.0 - 53.7 | 64.0 | 57.7 - 80.7 | 79.3 | 65.0 - 178  | 28.4 | 24.9 - 32.4 |
| 6-11  | mU     | LU      | DEMOCOPHES-LU   | 2011 - 2012   | F,M | 60  |      | 0.10 | 0.00          | 14.0 | 12.0 - 17.0 | 20.5 | 17.8 - 25.7 | 26.5 | 24.6 - 40.9 | 36.1 |             | 12.4 | 10.2 - 15.1 |
| 6-11  | mU     | DE      | DEMOCOPHES-DE   | 2011          | F,M | 119 |      | 0.20 | 0.00          | 21.2 | 18.3 - 24.5 | 34.0 | 29.9 - 40.0 | 50.7 | 40.9 - 61.2 | 60.1 | 52.1 - 271  | 21.9 | 19.1 - 25.0 |
| 6-11  | mU     | BE      | DEMOCOPHES-BE   | 2011 - 2012   | F,M | 129 |      | 0.10 | 0.00          | 16.0 | 14.0 - 21.0 | 30.0 | 25.0 - 38.6 | 65.4 | 44.9 - 106  | 103  | 74.9 - 178  | 18.8 | 15.9 - 22.1 |
| 6-11  | mU     | HU      | DEMOCOPHES-HU   | 2011 - 2012   | F,M | 120 |      | 0.61 | 0.00          | 33.3 | 26.5 - 38.7 | 54.2 | 47.6 - 70.7 | 93.3 | 75.3 - 155  | 155  | 98.2 - 286  | 32.9 | 28.3 - 38.3 |
| 6-11  | mU     | PL      | DEMOCOPHES-PL   | 2011 - 2012   | F,M | 120 |      | 0.10 | 0.00          | 39.0 | 36.9 - 44.0 | 54.0 | 48.0 - 66.9 | 106  | 71.4 - 138  | 135  | 110 - 190   | 40.0 | 35.4 - 45.3 |
| 6-11  | mU     | CZ      | DEMOCOPHES-CZ   | 2011 - 2012   | F,M | 120 |      | 0.61 | 0.00          | 33.1 | 29.4 - 38.8 | 60.9 | 46.6 - 75.5 | 91.9 | 78.2 - 121  | 114  | 97.3 - 246  | 37.0 | 32.5 - 42.0 |
| 6-11  | mU     | SK      | DEMOCOPHES-SK   | 2011 - 2012   | F,M | 129 |      | 0.61 | 0.00          | 51.2 | 42.7 - 59.0 | 85.2 | 72.5 - 96.9 | 125  | 103 - 165   | 159  | 129 - 257   | 50.3 | 44.2 - 57.2 |
| 6-11  | mU     | NO      | IES             | 2012          | F,M | 50  | 0.20 | 0.50 | 0.00          | 21.4 | 17.8 - 24.7 | 33.1 | 24.4 - 37.5 | 41.0 | 35.9 - 53.4 | 44.1 |             | 20.9 | 17.9 - 24.3 |
| 6-11  | mU     | SK      | PCBcohort_c     | 2014 - 2016   | F,M | 249 | 0.48 |      | 0.00          | 26.9 | 25.0 - 29.3 | 39.7 | 34.6 - 44.5 | 58.1 | 52.8 - 68.5 | 75.8 | 61.7 - 102  | 26.9 | 24.8 - 29.1 |
| 6-11  | mU     | DE      | GerES V         | 2015 - 2017   | F,M | 937 |      | 0.20 | 0.11          | 12.0 | 11.4 - 12.7 | 18.1 | 17.3 - 19.2 | 28.6 | 26.3 - 31.7 | 39.1 | 35.5 - 44.8 | 12.0 | 11.5 - 12.6 |
| 6-11  | sU     | SK      | Children cohort | 2015 - 2016   | F,M | 112 |      | 0.20 | 0.00          | 20.0 | 15.6 - 22.9 | 35.1 | 29.2 - 40.7 | 51.3 | 42.6 - 82.8 | 78.0 | 51.7 - 123  | 19.4 | 16.5 - 22.8 |
| 6-11  | mU     | CZ      | CzechHBM-CE     | 2016 - 2017   | F,M | 223 |      | 1.50 | 0.00          | 21.9 | 18.8 - 23.9 | 34.7 | 28.1 - 38.5 | 52.1 | 44.0 - 62.8 | 65.6 | 57.1 - 81.7 | 20.5 | 18.6 - 22.5 |
| 12-19 | mU     | DE      | GerES IV 2005   | 2005          | F,M | 51  |      | 0.25 | 0.00          | 37.6 | 33.7 - 44.9 | 54.4 | 43.7 - 86.9 | 91.1 | 64.5 - 264  | 169  |             | 41.1 | 32.8 - 51.6 |
| 12-19 | mU     | DK      | CPHPUB-Cross    | 2006 - 2008   | F,M | 389 | 0.91 |      | 0.00          | 38.8 | 35.5 - 41.8 | 66.1 | 61.2 - 71.5 | 99.4 | 90.1 - 117  | 130  | 117 - 204   | 39.6 | 36.4 - 42.9 |
| 12-19 | sU     | DK      | DYMS 2007       | 2007          | M   | 239 | 0.91 | 0.91 | 0.42          | 25.2 | 22.0 - 28.6 | 38.3 | 35.0 - 44.9 | 59.7 | 53.2 - 85.1 | 90.4 | 70.5 - 163  | 23.1 | 20.5 - 26.0 |
| 12-19 | sU     | DK      | DYMS 2008       | 2008          | M   | 261 | 0.91 | 0.91 | 0.77          | 20.9 | 18.4 - 24.1 | 33.1 | 29.1 - 36.4 | 54.6 | 45.6 - 71.1 | 81.5 | 61.0 - 243  | 20.3 | 17.9 - 23.1 |
| 12-19 | mU     | BE      | FLEHS2RefAdo    | 2008 - 2009   | F,M | 210 | 0.10 |      | 0.00          | 22.0 | 18.0 - 24.0 | 32.8 | 30.5 - 38.0 | 51.1 | 43.6 - 61.6 | 68.8 | 57.8 - 103  | 21.6 | 19.5 - 24.0 |
| 12-19 | sU     | DK      | DYMS 2009       | 2009          | M   | 210 | 0.05 | 0.05 | 0.00          | 17.9 | 16.0 - 20.2 | 30.9 | 25.1 - 35.0 | 55.6 | 40.8 - 59.3 | 64.8 | 57.8 - 72.5 | 16.3 | 14.3 - 18.6 |
| 12-19 | sU     | AT      | PBAT            | 2010 - 2012   | F,M | 94  | 0.79 | 1.58 | 14.9          | 4.38 | 3.10 - 5.67 | 11.6 | 7.24 - 17.8 | 22.7 | 18.0 - 26.9 | 26.4 | 23.4 - 52.6 | 4.88 | 3.94 - 6.05 |
| 12-19 | sU     | DK      | DYMS 2013       | 2013          | M   | 70  | 0.05 | 0.05 | 0.00          | 9.34 | 6.99 - 10.5 | 13.9 | 10.8 - 17.7 | 22.7 | 16.1 - 32.4 | 28.5 |             | 7.82 | 6.15 - 9.92 |
| 12-19 | sU     | BE      | FLEHS3RefAdo    | 2013          | F,M | 207 |      | 0.10 | 0.00          | 8.38 | 7.42 - 9.54 | 13.2 | 11.7 - 15.1 | 20.6 | 17.0 - 25.2 | 28.9 | 21.6 - 35.6 | 8.36 | 7.56 - 9.25 |

| Age   | Matrix | Country | Data collection | Sampling year | Sex | N   | LOD  | LOQ  | % below limit | P50  | P50_95% CI  | P75  | P75_95% CI  | P90  | P90_95% CI  | P95  | P95_95% CI  | GM   | GM_95% CI   |
|-------|--------|---------|-----------------|---------------|-----|-----|------|------|---------------|------|-------------|------|-------------|------|-------------|------|-------------|------|-------------|
| 12-19 | mU     | DE      | GerES V         | 2015 - 2017   | F,M | 932 |      | 0.20 | 0.00          | 8.50 | 8.16 - 9.00 | 13.3 | 12.8 - 14.3 | 22.7 | 20.7 - 24.3 | 28.7 | 26.6 - 35.3 | 8.70 | 8.29 - 9.12 |
| 12-19 | mU     | SK      | PCBcohort_t     | 2015 - 2017   | F,M | 65  | 0.48 |      | 0.00          | 16.7 | 12.5 - 20.0 | 25.7 | 21.3 - 38.7 | 43.6 | 33.7 - 71.3 | 60.7 |             | 15.2 | 12.3 - 18.9 |
| 12-19 | sU     | DK      | DYMS 2017       | 2017          | M   | 76  | 0.05 | 0.05 | 0.00          | 5.67 | 4.79 - 6.76 | 8.60 | 7.36 - 10.1 | 11.7 | 9.50 - 33.1 | 22.9 | 11.8 - 54.5 | 5.04 | 4.09 - 6.21 |
| 20-39 | 24hU   | DE      | ESB 2007        | 2007          | F,M | 60  |      | 0.20 | 0.00          | 10.8 | 8.30 - 12.7 | 19.4 | 14.1 - 26.8 | 30.0 | 26.1 - 121  | 41.5 |             | 11.7 | 9.29 - 14.6 |
| 20-39 | sU     | DK      | DYMS 2008       | 2008          | M   | 54  | 0.91 | 0.91 | 0.00          | 26.8 | 20.3 - 31.3 | 41.7 | 31.3 - 57.5 | 60.4 | 49.5 - 71.9 | 68.2 |             | 23.8 | 19.3 - 29.3 |
| 20-39 | mU     | BE      | FLEHS2RefAdult  | 2008 - 2009   | F,M | 189 | 0.10 |      | 0.00          | 14.0 | 12.0 - 16.0 | 24.0 | 20.0 - 27.0 | 42.0 | 33.2 - 51.0 | 54.0 | 44.0 - 105  | 12.8 | 11.1 - 14.9 |
| 20-39 | 24hU   | DE      | ESB 2008        | 2008          | F,M | 54  |      | 0.50 | 0.00          | 9.30 | 7.76 - 10.7 | 14.3 | 10.7 - 19.0 | 19.9 | 17.3 - 25.0 | 22.3 |             | 9.49 | 8.18 - 11.0 |
| 20-39 | sU     | DK      | DYMS 2009       | 2009          | M   | 79  | 0.05 | 0.05 | 0.00          | 19.9 | 16.8 - 24.5 | 34.4 | 26.5 - 40.4 | 47.2 | 38.9 - 69.5 | 58.3 | 47.6 - 1065 | 19.8 | 16.1 - 24.4 |
| 20-39 | 24hU   | DE      | ESB 2009        | 2009          | F,M | 60  |      | 0.20 | 0.00          | 8.80 | 6.22 - 10.9 | 13.8 | 11.1 - 19.9 | 21.9 | 18.3 - 47.3 | 34.8 |             | 8.52 | 6.76 - 10.8 |
| 20-39 | sU     | AT      | PBAT            | 2010 - 2011   | F,M | 135 | 0.79 | 1.58 | 45.9          | 1.76 |             | 2.94 | 2.52 - 3.82 | 6.40 | 4.67 - 7.55 | 7.54 | 6.85 - 22.1 | 2.02 | 1.76 - 2.32 |
| 20-39 | mU     | SE      | DEMOCOPHES-SE   | 2011 - 2012   | F   | 50  |      | 0.30 | 0.00          | 12.4 | 10.6 - 19.5 | 25.9 | 19.1 - 33.5 | 37.0 | 29.3 - 336  | 66.8 |             | 14.6 | 11.0 - 19.5 |
| 20-39 | mU     | DK      | DEMOCOPHES-DK   | 2011          | F   | 51  |      | 0.91 | 0.00          | 12.8 | 11.1 - 18.5 | 21.6 | 18.5 - 30.1 | 36.4 | 25.5 - 68.7 | 58.7 |             | 13.6 | 10.8 - 17.0 |
| 20-39 | mU     | SL      | DEMOCOPHES-SI   | 2011 - 2012   | F   | 63  |      | 0.50 | 0.00          | 21.0 | 18.0 - 26.3 | 37.0 | 27.0 - 55.3 | 59.8 | 54.0 - 138  | 127  |             | 21.3 | 16.8 - 27.0 |
| 20-39 | mU     | DE      | DEMOCOPHES-DE   | 2011          | F   | 64  |      | 0.20 | 0.00          | 12.4 | 10.7 - 15.4 | 21.6 | 15.7 - 27.0 | 33.0 | 25.0 - 50.4 | 41.6 |             | 13.2 | 11.0 - 15.8 |
| 20-39 | mU     | BE      | DEMOCOPHES-BE   | 2011 - 2012   | F   | 62  |      | 0.10 | 0.00          | 11.0 | 8.33 - 14.2 | 21.0 | 16.0 - 41.0 | 50.9 | 33.0 - 65.9 | 57.9 |             | 11.6 | 9.07 - 14.9 |
| 20-39 | 24hU   | DE      | ESB 2011        | 2011          | F,M | 60  |      | 0.20 | 0.00          | 7.45 | 6.31 - 9.10 | 10.6 | 9.10 - 12.8 | 14.4 | 12.1 - 20.3 | 18.3 |             | 7.56 | 6.62 - 8.64 |
| 20-39 | mU     | HU      | DEMOCOPHES-HU   | 2011 - 2012   | F   | 89  |      | 0.61 | 0.00          | 20.5 | 18.0 - 27.2 | 34.0 | 28.4 - 48.8 | 61.3 | 48.0 - 80.5 | 78.1 | 62.0 - 163  | 20.1 | 16.6 - 24.2 |
| 20-39 | mU     | PL      | DEMOCOPHES-PL   | 2011 - 2012   | F   | 88  |      | 0.10 | 0.00          | 22.5 | 17.4 - 30.0 | 39.2 | 33.0 - 50.0 | 60.4 | 49.4 - 123  | 89.0 | 63.5 - 218  | 22.4 | 18.6 - 27.1 |
| 20-39 | mU     | CZ      | DEMOCOPHES-CZ   | 2011 - 2012   | F   | 88  |      | 0.61 | 0.00          | 17.3 | 14.6 - 19.7 | 26.8 | 21.9 - 42.3 | 55.5 | 41.9 - 66.5 | 62.7 | 55.8 - 80.5 | 17.8 | 15.2 - 20.8 |
| 20-39 | mU     | SK      | DEMOCOPHES-SK   | 2011 - 2012   | F   | 91  |      | 0.61 | 0.00          | 24.0 | 17.2 - 27.7 | 36.9 | 30.0 - 46.8 | 61.3 | 46.7 - 87.7 | 73.7 | 62.2 - 122  | 21.9 | 18.5 - 26.0 |
| 20-39 | sU     | IL      | IBS             | 2011          | F,M | 144 | 0.25 | 0.50 | 0.00          | 29.3 | 25.7 - 36.5 | 52.2 | 44.8 - 61.3 | 86.7 | 65.6 - 102  | 102  | 88.5 - 251  | 29.2 | 25.3 - 33.7 |
| 20-39 | 24hU   | DE      | ESB 2013        | 2013          | F,M | 60  |      | 0.20 | 0.00          | 5.70 | 4.70 - 7.39 | 8.62 | 7.40 - 11.7 | 12.3 | 10.8 - 15.4 | 14.8 |             | 5.97 | 5.20 - 6.86 |
| 20-39 | 24hU   | DE      | ESB 2015        | 2015          | F,M | 60  |      | 0.20 | 0.00          | 4.20 | 3.50 - 5.39 | 6.95 | 5.48 - 8.37 | 11.2 | 7.93 - 18.5 | 17.9 |             | 4.56 | 3.77 - 5.51 |
| 20-39 | sU     | CZ      | CzechHBM-AE     | 2018 - 2019   | F,M | 194 |      | 2.84 | 33.0          | 4.22 | 3.48 - 4.90 | 7.48 | 6.39 - 9.95 | 16.2 | 11.6 - 22.0 | 23.7 | 17.8 - 40.2 | 4.17 | 3.62 - 4.81 |
| 40-59 | sU     | AT      | PBAT            | 2010 - 2011   | F,M | 112 | 0.79 | 1.58 | 50.9          |      |             | 2.79 | 2.42 - 3.97 | 6.82 | 4.10 - 10.6 | 10.5 | 6.89 - 16.5 |      |             |
| 40-59 | mU     | DK      | DEMOCOPHES-DK   | 2011          | F   | 94  |      | 0.91 | 0.00          | 11.5 | 10.1 - 14.9 | 21.6 | 17.1 - 26.0 | 33.4 | 26.2 - 46.7 | 42.0 | 34.9 - 346  | 12.9 | 10.8 - 15.4 |
| 40-59 | mU     | ES      | DEMOCOPHES-ES   | 2011 - 2012   | F   | 75  |      | 0.20 | 0.00          | 19.9 | 16.0 - 27.9 | 40.4 | 30.1 - 52.9 | 68.8 | 51.6 - 79.3 | 74.5 | 69.1 - 94.3 | 20.8 | 16.9 - 25.4 |
| 40-59 | mU     | SL      | DEMOCOPHES-SI   | 2011 - 2012   | F   | 57  |      | 0.50 | 0.00          | 14.0 | 10.7 - 19.0 | 22.0 | 19.0 - 34.3 | 36.4 | 30.1 - 46.5 | 44.2 |             | 14.2 | 11.7 - 17.3 |
| 40-59 | mU     | DE      | DEMOCOPHES-DE   | 2011          | F   | 56  |      | 0.20 | 0.00          | 8.79 | 6.86 - 12.0 | 16.9 | 12.2 - 24.6 | 25.4 | 19.8 - 37.4 | 33.5 |             | 8.99 | 7.29 - 11.1 |
| 40-59 | mU     | BE      | DEMOCOPHES-BE   | 2011 - 2012   | F   | 67  |      | 0.10 | 0.00          | 10.0 | 9.00 - 13.0 | 16.0 | 13.0 - 18.3 | 20.0 | 18.0 - 29.4 | 26.8 |             | 10.2 | 8.88 - 11.8 |
| 40-59 | sU     | IL      | IBS             | 2011          | F,M | 86  | 0.25 | 0.50 | 0.00          | 33.6 | 26.0 - 41.3 | 55.8 | 46.3 - 66.3 | 93.0 | 66.0 - 116  | 109  | 94.6 - 264  | 29.9 | 24.5 - 36.5 |
| 40-59 | sU     | CZ      | CzechHBM-AE     | 2018 - 2019   | F,M | 192 |      | 2.84 | 24.5          | 5.07 | 4.33 - 6.05 | 9.82 | 7.75 - 10.9 | 22.1 | 14.1 - 34.9 | 39.1 | 29.0 - 76.3 | 5.38 | 4.62 - 6.26 |
| 6-59  | mU     | AT      | IC-HBM          | 2009          | F   | 50  | 0.06 | 0.24 | 2.00          | 3.00 | 2.27 - 3.50 | 4.53 | 3.49 - 7.49 | 8.04 | 5.62 - 43.4 | 17.9 |             | 2.89 | 2.14 - 3.90 |
| 6-59  | mU     | AT      | IC-HBM          | 2009          | F,M | 50  | 0.06 | 0.24 | 0.00          | 4.60 | 3.77 - 5.63 | 6.90 | 5.59 - 7.85 | 8.00 | 7.30 - 22.5 | 8.87 |             | 4.60 | 3.90 - 5.42 |
| 60+   | sU     | AT      | PBAT            | 2010 - 2012   | F,M | 89  | 0.79 | 1.58 | 24.7          | 2.80 | 2.39 - 3.40 | 4.84 | 3.90 - 9.33 | 14.8 | 9.28 - 28.9 | 22.0 | 15.1 - 67.3 | 3.26 | 2.64 - 4.04 |

| Age | Matrix | Country | Data collection | Sampling year | Sex | N | LOD | LOQ | % below limit | P50 | P50_95% CI | P75 | P75_95% CI | P90 | P90_95% CI | P95 | P95_95% CI | GM | GM_95% CI |
|-----|--------|---------|-----------------|---------------|-----|---|-----|-----|---------------|-----|------------|-----|------------|-----|------------|-----|------------|----|-----------|
|-----|--------|---------|-----------------|---------------|-----|---|-----|-----|---------------|-----|------------|-----|------------|-----|------------|-----|------------|----|-----------|

Notes. Matrix: mU - first morning urine, sU - spot urine, 24hU - 24-hours urine; country: AT - Austria, BE - Belgium, CZ - Czech Republic, DE - Germany, DK - Denmark, ES - Spain, HU - Hungary, IL - Israel, LU - Luxemburg, NO - Norway, PL - Poland, SE - Sweden, SI - Slovenia, SK - Slovakia; sex: F - female, M - male; n - sample size; LOD - limit of detection; LOQ - limit of quantification; % below limit - percentage of values below limit of detection/quantification, whichever was applied in the data collection; P50, P75, P90, P95 - 50th, 75th, 90th, 95th percentile; 95% CI - 95 % confidence interval; GM - geometric mean; NA - Not available.

Data only displayed if n was at least 50; percentiles missing when below LOD/LOQ; CIs of the observed percentiles missing when they fall outside the observed range; GM was imputed (fixed imputation) based on a log-normal distribution when at least 50 % of values were above LOD/LOQ.

**Table S4: DEHP metabolite 5oxo-MEHP (Mono(2-ethyl-5-oxo-hexyl) phthalate) in microg/L**

| Age   | Matrix | Country | Data collection | Sampling year | Sex | N   | LOD  | LOQ  | % below limit | P50  | P50_95% CI  | P75  | P75_95% CI  | P90  | P90_95% CI  | P95  | P95_95% CI  | GM   | GM_95% CI   |
|-------|--------|---------|-----------------|---------------|-----|-----|------|------|---------------|------|-------------|------|-------------|------|-------------|------|-------------|------|-------------|
| 3-5   | mU     | DE      | GerES IV 2005   | 2005          | F,M | 50  |      | 0.25 | 0.00          | 43.8 | 32.4 - 55.5 | 58.6 | 55.0 - 82.9 | 104  | 67.2 - 210  | 149  |             | 39.6 | 31.7 - 49.4 |
| 3-5   | sU     | DK      | CPH-MC          | 2006          | F,M | 189 | 0.14 |      | 0.00          | 20.9 | 17.3 - 24.5 | 35.0 | 31.7 - 43.9 | 57.7 | 49.1 - 69.9 | 76.6 | 64.1 - 181  | 18.3 | 15.8 - 21.2 |
| 3-5   | mU     | DE      | GerES V         | 2015 - 2017   | F,M | 388 |      | 0.20 | 0.00          | 9.70 | 8.80 - 10.8 | 17.1 | 15.3 - 19.3 | 29.0 | 26.2 - 33.1 | 35.9 | 33.0 - 48.5 | 10.2 | 9.44 - 11.0 |
| 3-5   | sU     | SK      | Children cohort | 2015 - 2016   | F,M | 67  |      | 0.20 | 0.00          | 12.2 | 9.53 - 14.5 | 19.1 | 15.0 - 23.6 | 29.9 | 22.7 - 49.3 | 43.3 |             | 11.1 | 8.97 - 13.6 |
| 3-5   | mU     | CZ      | CzechHBM-CE     | 2016 - 2017   | F,M | 148 |      | 2.00 | 1.35          | 13.7 | 12.5 - 16.1 | 19.2 | 17.8 - 23.3 | 34.8 | 27.4 - 40.0 | 40.6 | 35.6 - 63.8 | 13.2 | 11.8 - 14.9 |
| 6-11  | mU     | DE      | GerES IV 2005   | 2005          | F,M | 102 |      | 0.25 | 0.00          | 39.8 | 34.7 - 43.8 | 61.1 | 49.7 - 78.0 | 94.9 | 78.1 - 116  | 109  | 95.6 - 193  | 38.8 | 33.9 - 44.6 |
| 6-11  | sU     | DK      | CPH-MC          | 2006 - 2007   | F,M | 659 | 0.14 |      | 0.00          | 16.6 | 15.4 - 18.7 | 28.6 | 26.1 - 30.4 | 43.5 | 39.7 - 49.1 | 59.7 | 53.6 - 76.9 | 15.4 | 14.3 - 16.5 |
| 6-11  | mU     | DK      | CPHPUB-Cross    | 2006 - 2008   | F,M | 913 | 0.67 |      | 0.00          | 26.0 | 24.9 - 27.6 | 40.2 | 38.4 - 43.7 | 66.7 | 61.1 - 73.9 | 83.3 | 78.6 - 96.8 | 26.7 | 25.4 - 28.0 |
| 6-11  | sU     | AT      | PBAT            | 2010 - 2012   | F,M | 165 | 0.56 | 1.12 | 10.9          | 3.71 | 2.71 - 4.86 | 9.14 | 7.17 - 12.0 | 17.2 | 13.6 - 19.3 | 19.7 | 17.9 - 25.3 | 4.03 | 3.46 - 4.70 |
| 6-11  | mU     | SE      | DEMOCOPHES-SE   | 2011 - 2012   | F,M | 98  |      | 0.30 | 0.00          | 16.0 | 13.6 - 18.0 | 24.1 | 19.8 - 29.7 | 34.2 | 30.0 - 73.1 | 59.2 | 35.4 - 101  | 15.4 | 13.3 - 17.8 |
| 6-11  | mU     | DK      | DEMOCOPHES-DK   | 2011          | F,M | 143 |      | 0.67 | 0.00          | 11.6 | 10.2 - 13.1 | 17.7 | 15.7 - 19.9 | 25.1 | 21.6 - 38.6 | 39.2 | 26.2 - 57.6 | 11.4 | 10.1 - 12.9 |
| 6-11  | mU     | ES      | DEMOCOPHES-ES   | 2011 - 2012   | F,M | 120 |      | 0.20 | 0.00          | 20.6 | 18.3 - 26.0 | 35.8 | 28.6 - 41.4 | 48.3 | 43.9 - 76.8 | 70.1 | 49.3 - 121  | 22.0 | 19.5 - 24.9 |
| 6-11  | mU     | SL      | DEMOCOPHES-SI   | 2011 - 2012   | F,M | 119 |      | 0.50 | 0.00          | 17.0 | 13.4 - 20.0 | 27.5 | 23.3 - 32.7 | 41.0 | 34.8 - 47.6 | 47.1 | 41.0 - 163  | 17.4 | 15.3 - 19.8 |
| 6-11  | mU     | LU      | DEMOCOPHES-LU   | 2011 - 2012   | F,M | 60  |      | 0.10 | 0.00          | 10.0 | 8.51 - 12.0 | 13.0 | 12.0 - 17.4 | 20.1 | 16.0 - 31.6 | 22.4 |             | 8.79 | 7.29 - 10.6 |
| 6-11  | mU     | DE      | DEMOCOPHES-DE   | 2011          | F,M | 119 |      | 0.20 | 0.00          | 14.0 | 11.8 - 16.2 | 21.7 | 18.8 - 25.8 | 33.4 | 27.5 - 42.3 | 41.9 | 36.0 - 186  | 14.4 | 12.6 - 16.5 |
| 6-11  | mU     | BE      | DEMOCOPHES-BE   | 2011 - 2012   | F,M | 129 |      | 0.10 | 0.00          | 12.0 | 10.0 - 15.0 | 21.0 | 17.4 - 30.0 | 43.0 | 32.6 - 74.1 | 73.0 | 46.1 - 125  | 13.5 | 11.5 - 15.8 |
| 6-11  | mU     | HU      | DEMOCOPHES-HU   | 2011 - 2012   | F,M | 120 |      | 0.24 | 0.00          | 22.7 | 17.4 - 28.2 | 38.7 | 33.9 - 46.5 | 62.7 | 50.5 - 102  | 101  | 72.7 - 154  | 22.3 | 19.2 - 26.0 |
| 6-11  | mU     | PL      | DEMOCOPHES-PL   | 2011 - 2012   | F,M | 120 |      | 0.10 | 0.00          | 26.0 | 23.0 - 29.0 | 32.5 | 31.0 - 39.5 | 62.3 | 43.7 - 82.5 | 82.0 | 65.8 - 140  | 25.7 | 22.8 - 28.9 |
| 6-11  | mU     | CZ      | DEMOCOPHES-CZ   | 2011 - 2012   | F,M | 120 |      | 0.24 | 0.00          | 21.9 | 19.3 - 27.7 | 42.0 | 33.1 - 48.9 | 62.1 | 53.3 - 83.7 | 81.4 | 66.1 - 180  | 24.8 | 21.7 - 28.2 |
| 6-11  | mU     | SK      | DEMOCOPHES-SK   | 2011 - 2012   | F,M | 129 |      | 0.24 | 0.00          | 35.1 | 28.0 - 41.9 | 55.9 | 48.3 - 70.8 | 87.7 | 73.7 - 103  | 102  | 88.4 - 177  | 33.9 | 29.8 - 38.6 |
| 6-11  | mU     | NO      | IES             | 2012          | F,M | 50  | 0.20 | 0.50 | 0.00          | 15.2 | 12.2 - 17.7 | 22.0 | 17.2 - 27.1 | 29.1 | 24.5 - 38.8 | 35.7 |             | 14.6 | 12.5 - 17.1 |
| 6-11  | mU     | SK      | PCBcohort_c     | 2014 - 2016   | F,M | 249 | 1.08 |      | 0.00          | 21.8 | 20.4 - 23.3 | 32.6 | 29.3 - 36.4 | 46.4 | 42.5 - 56.2 | 61.7 | 51.1 - 85.8 | 21.8 | 20.1 - 23.7 |
| 6-11  | mU     | DE      | GerES V         | 2015 - 2017   | F,M | 933 |      | 0.20 | 0.11          | 8.50 | 8.10 - 8.90 | 13.2 | 12.5 - 14.2 | 21.7 | 19.7 - 23.3 | 29.3 | 26.4 - 33.6 | 8.51 | 8.11 - 8.93 |
| 6-11  | sU     | SK      | Children cohort | 2015 - 2016   | F,M | 112 |      | 0.20 | 0.00          | 14.1 | 11.1 - 16.7 | 25.9 | 21.5 - 30.5 | 39.8 | 32.6 - 58.0 | 56.4 | 41.3 - 87.8 | 13.9 | 11.8 - 16.3 |
| 6-11  | mU     | CZ      | CzechHBM-CE     | 2016 - 2017   | F,M | 223 |      | 2.00 | 1.35          | 13.5 | 12.2 - 14.7 | 20.4 | 18.5 - 23.9 | 30.7 | 28.8 - 39.4 | 41.2 | 36.2 - 45.4 | 12.8 | 11.6 - 14.1 |
| 12-19 | mU     | DE      | GerES IV 2005   | 2005          | F,M | 51  |      | 0.25 | 0.00          | 27.2 | 25.5 - 32.9 | 44.6 | 32.3 - 68.7 | 72.0 | 47.1 - 199  | 106  |             | 31.0 | 24.8 - 38.7 |
| 12-19 | mU     | DK      | CPHPUB-Cross    | 2006 - 2008   | F,M | 389 | 0.67 |      | 0.26          | 19.2 | 17.7 - 21.0 | 32.2 | 29.3 - 34.4 | 49.6 | 44.0 - 52.2 | 62.8 | 51.8 - 81.8 | 19.4 | 17.9 - 21.1 |
| 12-19 | sU     | DK      | DYMS 2007       | 2007          | M   | 239 | 0.67 | 0.67 | 0.42          | 18.1 | 16.0 - 19.6 | 27.9 | 25.4 - 32.5 | 45.6 | 38.7 - 60.0 | 66.9 | 50.7 - 103  | 16.7 | 14.9 - 18.8 |
| 12-19 | sU     | DK      | DYMS 2008       | 2008          | M   | 261 | 0.67 | 0.67 | 0.77          | 15.6 | 14.6 - 17.4 | 24.4 | 21.5 - 26.9 | 38.7 | 33.2 - 50.2 | 56.6 | 45.5 - 176  | 15.0 | 13.2 - 17.0 |
| 12-19 | mU     | BE      | FLEHS2RefAdo    | 2008 - 2009   | F,M | 210 | 0.10 |      | 0.00          | 27.5 | 24.4 - 31.0 | 48.0 | 40.0 - 54.0 | 85.3 | 62.2 - 118  | 126  | 96.3 - 206  | 29.0 | 25.9 - 32.5 |
| 12-19 | sU     | DK      | DYMS 2009       | 2009          | M   | 210 | 0.06 | 0.06 | 0.48          | 8.54 | 7.71 - 9.70 | 14.0 | 12.5 - 17.1 | 23.2 | 20.6 - 27.3 | 28.0 | 24.1 - 38.2 | 7.86 | 6.93 - 8.93 |
| 12-19 | sU     | AT      | PBAT            | 2010 - 2012   | F,M | 94  | 0.56 | 1.12 | 11.7          | 3.08 | 2.45 - 3.93 | 8.90 | 5.28 - 11.1 | 16.3 | 11.1 - 18.6 | 18.0 | 16.7 - 39.4 | 3.58 | 2.91 - 4.42 |
| 12-19 | sU     | DK      | DYMS 2013       | 2013          | M   | 70  | 0.06 | 0.06 | 0.00          | 5.73 | 4.76 - 7.22 | 9.26 | 7.77 - 12.6 | 14.9 | 12.2 - 21.1 | 19.6 |             | 5.45 | 4.34 - 6.85 |
| 12-19 | sU     | BE      | FLEHS3RefAdo    | 2013          | F,M | 207 |      | 0.10 | 0.00          | 6.84 | 6.12 - 7.78 | 10.4 | 9.32 - 11.8 | 16.0 | 13.2 - 20.4 | 22.0 | 18.8 - 31.7 | 6.62 | 5.98 - 7.34 |

| Age   | Matrix | Country | Data collection | Sampling year | Sex | N   | LOD  | LOQ  | % below limit | P50  | P50_95% CI  | P75  | P75_95% CI  | P90  | P90_95% CI  | P95  | P95_95% CI  | GM   | GM_95% CI   |
|-------|--------|---------|-----------------|---------------|-----|-----|------|------|---------------|------|-------------|------|-------------|------|-------------|------|-------------|------|-------------|
| 12-19 | mU     | DE      | GerES V         | 2015 - 2017   | F,M | 931 |      | 0.20 | 0.00          | 5.80 | 5.50 - 6.20 | 9.40 | 8.96 - 10.0 | 15.3 | 14.2 - 17.3 | 20.1 | 18.4 - 24.1 | 5.76 | 5.47 - 6.06 |
| 12-19 | mU     | SK      | PCBcohort_t     | 2015 - 2017   | F,M | 65  | 1.08 |      | 1.54          | 18.1 | 15.4 - 24.0 | 32.4 | 24.8 - 42.3 | 50.9 | 37.6 - 86.0 | 63.0 |             | 18.6 | 15.1 - 23.0 |
| 12-19 | sU     | DK      | DYMS 2017       | 2017          | M   | 76  | 0.06 | 0.06 | 0.00          | 3.97 | 3.46 - 5.09 | 5.60 | 5.23 - 7.00 | 8.03 | 6.81 - 20.2 | 15.4 | 8.05 - 32.5 | 3.55 | 2.90 - 4.35 |
| 20-39 | 24hU   | DE      | ESB 2007        | 2007          | F,M | 60  |      | 0.20 | 0.00          | 6.25 | 5.10 - 8.20 | 10.2 | 8.36 - 15.9 | 17.4 | 14.4 - 64.7 | 22.0 |             | 6.93 | 5.59 - 8.59 |
| 20-39 | sU     | DK      | DYMS 2008       | 2008          | M   | 54  | 0.67 | 0.67 | 0.00          | 18.6 | 13.9 - 23.2 | 28.3 | 23.3 - 35.5 | 38.6 | 33.7 - 49.4 | 45.8 |             | 17.2 | 14.1 - 20.8 |
| 20-39 | mU     | BE      | FLEHS2RefAdult  | 2008 - 2009   | F,M | 189 | 0.10 |      | 0.00          | 15.0 | 13.0 - 19.4 | 31.0 | 26.0 - 36.6 | 68.2 | 43.1 - 99.5 | 119  | 81.1 - 224  | 15.9 | 13.5 - 18.8 |
| 20-39 | 24hU   | DE      | ESB 2008        | 2008          | F,M | 54  |      | 0.50 | 0.00          | 5.91 | 5.10 - 6.83 | 9.71 | 6.83 - 12.2 | 13.0 | 11.5 - 14.7 | 14.1 |             | 6.27 | 5.43 - 7.23 |
| 20-39 | sU     | DK      | DYMS 2009       | 2009          | M   | 79  | 0.06 | 0.06 | 0.00          | 10.0 | 8.15 - 13.3 | 16.6 | 14.0 - 18.8 | 22.4 | 18.3 - 28.9 | 26.7 | 22.7 - 492  | 9.48 | 7.71 - 11.7 |
| 20-39 | 24hU   | DE      | ESB 2009        | 2009          | F,M | 60  |      | 0.20 | 0.00          | 5.05 | 3.91 - 6.29 | 7.12 | 6.46 - 9.33 | 12.6 | 8.52 - 22.9 | 17.5 |             | 4.74 | 3.80 - 5.91 |
| 20-39 | sU     | AT      | PBAT            | 2010 - 2011   | F,M | 135 | 0.56 | 1.12 | 43.0          | 1.23 |             | 1.99 | 1.75 - 2.75 | 4.49 | 3.43 - 6.87 | 6.74 | 4.66 - 15.9 | 1.43 | 1.24 - 1.65 |
| 20-39 | mU     | SE      | DEMOCOPHES-SE   | 2011 - 2012   | F   | 50  |      | 0.30 | 0.00          | 7.96 | 6.83 - 10.6 | 14.0 | 10.4 - 19.4 | 22.9 | 17.1 - 154  | 45.1 |             | 8.55 | 6.38 - 11.5 |
| 20-39 | mU     | DK      | DEMOCOPHES-DK   | 2011          | F   | 51  |      | 0.67 | 1.96          | 6.85 | 5.29 - 8.41 | 9.82 | 8.31 - 15.1 | 16.2 | 14.0 - 33.6 | 27.5 |             | 6.47 | 5.12 - 8.17 |
| 20-39 | mU     | SL      | DEMOCOPHES-SI   | 2011 - 2012   | F   | 63  |      | 0.50 | 0.00          | 11.0 | 8.77 - 15.0 | 21.0 | 15.0 - 33.1 | 35.6 | 30.2 - 65.3 | 57.4 |             | 11.2 | 8.74 - 14.2 |
| 20-39 | mU     | DE      | DEMOCOPHES-DE   | 2011          | F   | 64  |      | 0.20 | 0.00          | 7.91 | 6.42 - 10.4 | 13.4 | 10.6 - 18.2 | 20.0 | 17.6 - 32.2 | 27.1 |             | 8.60 | 7.19 - 10.3 |
| 20-39 | mU     | BE      | DEMOCOPHES-BE   | 2011 - 2012   | F   | 62  |      | 0.10 | 0.00          | 7.75 | 5.48 - 9.82 | 13.0 | 10.2 - 24.3 | 34.9 | 22.0 - 44.8 | 42.0 |             | 7.98 | 6.25 - 10.2 |
| 20-39 | 24hU   | DE      | ESB 2011        | 2011          | F,M | 60  |      | 0.20 | 0.00          | 5.60 | 4.80 - 6.59 | 7.35 | 6.60 - 9.71 | 11.0 | 9.36 - 18.1 | 13.9 |             | 5.52 | 4.77 - 6.39 |
| 20-39 | mU     | HU      | DEMOCOPHES-HU   | 2011 - 2012   | F   | 89  |      | 0.24 | 0.00          | 14.3 | 11.3 - 17.0 | 24.0 | 19.3 - 31.9 | 35.9 | 31.7 - 60.4 | 53.1 | 37.9 - 96.8 | 13.6 | 11.3 - 16.4 |
| 20-39 | mU     | PL      | DEMOCOPHES-PL   | 2011 - 2012   | F   | 88  |      | 0.10 | 0.00          | 15.0 | 10.4 - 18.6 | 26.0 | 21.0 - 30.1 | 34.8 | 29.8 - 76.3 | 56.9 | 37.1 - 128  | 14.1 | 11.7 - 16.9 |
| 20-39 | mU     | CZ      | DEMOCOPHES-CZ   | 2011 - 2012   | F   | 88  |      | 0.24 | 0.00          | 11.1 | 9.32 - 12.9 | 17.4 | 14.5 - 25.4 | 32.9 | 25.3 - 44.2 | 42.3 | 32.9 - 54.1 | 11.5 | 9.81 - 13.4 |
| 20-39 | mU     | SK      | DEMOCOPHES-SK   | 2011 - 2012   | F   | 91  |      | 0.24 | 0.00          | 14.1 | 12.4 - 17.2 | 22.1 | 18.5 - 31.8 | 38.8 | 31.8 - 53.6 | 52.0 | 39.3 - 83.3 | 13.9 | 11.8 - 16.5 |
| 20-39 | sU     | IL      | IBS             | 2011          | F,M | 144 | 0.25 | 0.50 | 0.00          | 16.2 | 14.5 - 19.8 | 32.4 | 24.1 - 39.8 | 52.6 | 42.2 - 61.0 | 61.0 | 56.4 - 143  | 16.6 | 14.3 - 19.2 |
| 20-39 | 24hU   | DE      | ESB 2013        | 2013          | F,M | 60  |      | 0.20 | 0.00          | 3.90 | 3.40 - 5.30 | 6.40 | 5.38 - 8.84 | 9.49 | 7.95 - 12.8 | 11.4 |             | 4.22 | 3.59 - 4.96 |
| 20-39 | 24hU   | DE      | ESB 2015        | 2015          | F,M | 60  |      | 0.20 | 0.00          | 3.15 | 2.30 - 3.70 | 4.88 | 3.78 - 5.90 | 6.63 | 5.86 - 14.1 | 10.6 |             | 3.13 | 2.59 - 3.78 |
| 20-39 | sU     | CZ      | CzechHBM-AE     | 2018 - 2019   | F,M | 194 |      | 2.71 | 54.1          |      |             | 4.67 | 3.53 - 6.10 | 9.43 | 6.94 - 12.9 | 13.7 | 10.4 - 24.0 |      |             |
| 40-59 | sU     | AT      | PBAT            | 2010 - 2011   | F,M | 112 | 0.56 | 1.12 | 56.2          |      |             | 1.96 | 1.56 - 2.71 | 4.11 | 2.77 - 7.00 | 6.81 | 4.42 - 8.92 |      |             |
| 40-59 | mU     | DK      | DEMOCOPHES-DK   | 2011          | F   | 94  |      | 0.67 | 0.00          | 5.90 | 4.85 - 6.70 | 9.19 | 7.67 - 11.7 | 15.5 | 11.8 - 20.3 | 18.5 | 15.6 - 202  | 5.87 | 4.89 - 7.05 |
| 40-59 | mU     | ES      | DEMOCOPHES-ES   | 2011 - 2012   | F   | 75  |      | 0.20 | 0.00          | 13.5 | 11.0 - 16.5 | 23.7 | 17.4 - 31.8 | 39.8 | 30.1 - 56.0 | 50.7 | 40.1 - 76.3 | 13.2 | 10.9 - 16.1 |
| 40-59 | mU     | SL      | DEMOCOPHES-SI   | 2011 - 2012   | F   | 57  |      | 0.50 | 0.00          | 7.60 | 5.74 - 9.20 | 15.0 | 9.20 - 17.3 | 18.0 | 17.0 - 20.8 | 19.2 |             | 7.47 | 6.18 - 9.03 |
| 40-59 | mU     | DE      | DEMOCOPHES-DE   | 2011          | F   | 56  |      | 0.20 | 0.00          | 5.82 | 4.57 - 7.58 | 10.3 | 7.62 - 15.0 | 17.5 | 11.6 - 22.3 | 21.2 |             | 5.90 | 4.78 - 7.28 |
| 40-59 | mU     | BE      | DEMOCOPHES-BE   | 2011 - 2012   | F   | 67  |      | 0.10 | 0.00          | 7.50 | 6.30 - 9.80 | 11.0 | 10.0 - 15.0 | 16.4 | 13.7 - 21.1 | 19.4 |             | 7.19 | 6.13 - 8.43 |
| 40-59 | sU     | IL      | IBS             | 2011          | F,M | 86  | 0.25 | 0.50 | 0.00          | 17.8 | 15.8 - 23.5 | 32.6 | 28.7 - 41.1 | 54.4 | 39.6 - 70.5 | 62.7 | 54.9 - 162  | 17.8 | 14.6 - 21.7 |
| 40-59 | sU     | CZ      | CzechHBM-AE     | 2018 - 2019   | F,M | 192 |      | 2.71 | 45.3          | 2.99 |             | 5.79 | 5.07 - 6.66 | 13.7 | 8.55 - 19.5 | 24.0 | 16.0 - 46.5 | 2.85 | 2.43 - 3.35 |
| 60+   | sU     | AT      | PBAT            | 2010 - 2012   | F,M | 89  | 0.56 | 1.12 | 34.8          | 1.60 | 1.24 - 1.90 | 2.60 | 2.10 - 6.79 | 8.10 | 6.62 - 18.0 | 14.0 | 8.36 - 51.6 | 1.79 | 1.41 - 2.27 |

Notes. Matrix: mU - first morning urine, sU - spot urine, 24hU - 24-hours urine; country: AT - Austria, BE - Belgium, CZ - Czech Republic, DE - Germany, DK - Denmark, ES - Spain, HU - Hungary, IL - Israel, LU - Luxemburg, NO - Norway, PL - Poland, SE - Sweden, SI - Slovenia, SK - Slovakia; sex: F - female, M - male; n - sample size; LOD - limit of detection; LOQ - limit of quantification; %

| Age | Matrix | Country | Data collection | Sampling year | Sex | N | LOD | LOQ | % below limit | P50 | P50_95% CI | P75 | P75_95% CI | P90 | P90_95% CI | P95 | P95_95% CI | GM | GM_95% CI |
|-----|--------|---------|-----------------|---------------|-----|---|-----|-----|---------------|-----|------------|-----|------------|-----|------------|-----|------------|----|-----------|
|-----|--------|---------|-----------------|---------------|-----|---|-----|-----|---------------|-----|------------|-----|------------|-----|------------|-----|------------|----|-----------|

below limit - percentage of values below limit of detection/quantification, whichever was applied in the data collection; P50, P75, P90, P95 - 50th, 75th, 90th, 95th percentile; 95% CI - 95 % confidence interval; GM - geometric mean; NA - Not available.

Data only displayed if n was at least 50; percentiles missing when below LOD/LOQ; CIs of the observed percentiles missing when they fall outside the observed range; GM was imputed (fixed imputation) based on a log-normal distribution when at least 50 % of values were above LOD/LOQ.



**Table S5: DEHP metabolite 5cx-MEPP (Mono(2-ethyl-5-carboxy- pentyl) phthalate) in microg/L**

| Age   | Matrix | Country | Data collection | Sampling year | Sex | N   | LOD  | LOQ  | % below limit | P50  | P50_95% CI  | P75  | P75_95% CI  | P90  | P90_95% CI  | P95  | P95_95% CI  | GM   | GM_95% CI   |
|-------|--------|---------|-----------------|---------------|-----|-----|------|------|---------------|------|-------------|------|-------------|------|-------------|------|-------------|------|-------------|
| 3-5   | mU     | DE      | GerES IV 2005   | 2005          | F,M | 50  |      | 0.25 | 0.00          | 74.6 | 62.6 - 94.5 | 105  | 93.2 - 158  | 174  | 126 - 444   | 290  |             | 73.0 | 58.6 - 91.0 |
| 3-5   | sU     | DK      | CPH-MC          | 2006          | F,M | 189 | 0.43 |      | 0.00          | 29.3 | 25.1 - 36.0 | 55.0 | 48.9 - 66.8 | 104  | 78.8 - 134  | 137  | 120 - 272   | 30.6 | 26.7 - 35.1 |
| 3-5   | mU     | DE      | GerES V         | 2015 - 2017   | F,M | 388 |      | 0.20 | 0.00          | 15.7 | 14.2 - 17.6 | 27.6 | 25.0 - 31.2 | 48.8 | 39.5 - 57.6 | 65.3 | 57.1 - 76.2 | 16.5 | 15.2 - 17.8 |
| 3-5   | sU     | SK      | Children cohort | 2015 - 2016   | F,M | 67  |      | 0.20 | 0.00          | 23.8 | 21.3 - 29.1 | 39.5 | 29.6 - 51.1 | 61.9 | 48.7 - 81.2 | 80.5 |             | 22.2 | 18.1 - 27.3 |
| 6-11  | mU     | DE      | GerES IV 2005   | 2005          | F,M | 102 |      | 0.25 | 0.00          | 63.4 | 53.9 - 70.4 | 98.7 | 83.7 - 126  | 153  | 128 - 207   | 201  | 155 - 332   | 65.6 | 57.7 - 74.6 |
| 6-11  | sU     | DK      | CPH-MC          | 2006 - 2007   | F,M | 659 | 0.43 |      | 0.00          | 28.3 | 25.9 - 30.9 | 48.1 | 44.4 - 52.8 | 75.9 | 70.5 - 86.8 | 108  | 91.5 - 130  | 26.8 | 25.0 - 28.8 |
| 6-11  | mU     | DK      | CPHPUB-Cross    | 2006 - 2008   | F,M | 913 | 0.55 |      | 0.00          | 29.3 | 27.7 - 31.0 | 44.9 | 41.9 - 48.3 | 68.3 | 61.9 - 75.0 | 89.4 | 80.9 - 103  | 29.7 | 28.4 - 31.1 |
| 6-11  | sU     | AT      | PBAT            | 2010 - 2012   | F,M | 165 | 0.46 | 0.92 | 0.00          | 15.8 | 13.7 - 17.7 | 27.5 | 23.4 - 33.8 | 42.8 | 39.5 - 55.5 | 56.3 | 45.0 - 80.1 | 16.1 | 14.4 - 18.1 |
| 6-11  | mU     | SE      | DEMOCOPHES-SE   | 2011 - 2012   | F,M | 98  |      | 0.30 | 0.00          | 22.6 | 17.7 - 25.0 | 31.8 | 27.3 - 38.4 | 46.3 | 39.1 - 79.5 | 75.0 | 49.8 - 125  | 21.3 | 18.6 - 24.4 |
| 6-11  | mU     | DK      | DEMOCOPHES-DK   | 2011          | F,M | 143 |      | 0.55 | 0.00          | 14.6 | 13.3 - 17.2 | 25.9 | 21.5 - 29.5 | 33.9 | 31.3 - 52.9 | 53.4 | 35.1 - 83.3 | 15.8 | 14.0 - 17.8 |
| 6-11  | mU     | LU      | DEMOCOPHES-LU   | 2011 - 2012   | F,M | 59  |      | 0.20 | 0.00          | 19.5 | 17.1 - 23.2 | 28.6 | 23.3 - 37.6 | 41.3 | 30.2 - 62.2 | 53.2 |             | 18.4 | 15.4 - 21.9 |
| 6-11  | mU     | DE      | DEMOCOPHES-DE   | 2011          | F,M | 119 |      | 0.20 | 0.00          | 26.3 | 23.6 - 33.5 | 44.3 | 36.8 - 51.8 | 65.3 | 53.3 - 83.9 | 80.4 | 65.9 - 381  | 28.4 | 24.7 - 32.5 |
| 6-11  | mU     | PL      | DEMOCOPHES-PL   | 2011 - 2012   | F,M | 94  | 0.12 | 0.37 | 0.00          | 23.6 | 19.6 - 28.6 | 37.3 | 31.8 - 49.5 | 54.1 | 49.6 - 70.6 | 63.7 | 54.6 - 109  | 22.1 | 18.9 - 25.7 |
| 6-11  | mU     | CZ      | DEMOCOPHES-CZ   | 2011 - 2012   | F,M | 118 | 0.07 | 0.20 | 0.00          | 17.9 | 15.4 - 21.2 | 29.7 | 24.7 - 38.0 | 44.7 | 39.7 - 71.6 | 70.5 | 46.6 - 169  | 19.0 | 16.5 - 21.9 |
| 6-11  | mU     | NO      | IES             | 2012          | F,M | 50  | 0.70 | 2.00 | 0.00          | 29.1 | 23.0 - 35.8 | 42.7 | 35.4 - 50.8 | 58.4 | 45.1 - 101  | 78.1 |             | 28.5 | 24.1 - 33.7 |
| 6-11  | mU     | SK      | PCBcohort_c     | 2014 - 2016   | F,M | 249 | 0.23 |      | 0.00          | 37.2 | 32.8 - 41.0 | 54.4 | 48.9 - 62.7 | 77.3 | 72.4 - 91.5 | 103  | 87.6 - 147  | 35.7 | 32.8 - 38.9 |
| 6-11  | mU     | DE      | GerES V         | 2015 - 2017   | F,M | 937 |      | 0.20 | 0.11          | 13.1 | 12.5 - 14.1 | 21.7 | 20.6 - 23.0 | 32.8 | 30.2 - 35.7 | 45.7 | 39.0 - 54.3 | 13.4 | 12.8 - 14.1 |
| 6-11  | sU     | SK      | Children cohort | 2015 - 2016   | F,M | 112 |      | 0.20 | 0.00          | 27.8 | 22.5 - 32.1 | 48.0 | 42.9 - 60.2 | 73.1 | 64.2 - 113  | 106  | 78.5 - 171  | 26.7 | 22.6 - 31.4 |
| 12-19 | mU     | DE      | GerES IV 2005   | 2005          | F,M | 51  |      | 0.25 | 0.00          | 53.1 | 40.3 - 68.1 | 80.7 | 67.5 - 107  | 114  | 90.9 - 283  | 156  |             | 52.8 | 42.2 - 66.0 |
| 12-19 | mU     | DK      | CPHPUB-Cross    | 2006 - 2008   | F,M | 389 | 0.55 |      | 0.00          | 22.3 | 21.1 - 24.6 | 37.7 | 35.0 - 42.5 | 57.0 | 50.7 - 66.0 | 72.5 | 65.9 - 81.3 | 22.9 | 21.1 - 24.8 |
| 12-19 | sU     | DK      | DYMS 2007       | 2007          | M   | 239 | 0.55 | 0.55 | 0.00          | 18.2 | 16.2 - 19.7 | 29.1 | 25.4 - 33.3 | 45.0 | 40.7 - 62.0 | 69.4 | 50.1 - 96.7 | 17.5 | 15.7 - 19.6 |
| 12-19 | sU     | DK      | DYMS 2008       | 2008          | M   | 261 | 0.55 | 0.55 | 0.38          | 14.9 | 13.3 - 16.9 | 25.0 | 22.4 - 27.5 | 36.2 | 32.0 - 47.1 | 61.2 | 39.7 - 149  | 15.1 | 13.4 - 17.1 |
| 12-19 | sU     | DK      | DYMS 2009       | 2009          | M   | 210 | 0.07 | 0.07 | 0.00          | 13.4 | 12.0 - 14.8 | 19.9 | 18.4 - 22.2 | 30.4 | 26.5 - 34.9 | 39.3 | 32.0 - 51.1 | 11.9 | 10.6 - 13.3 |
| 12-19 | sU     | AT      | PBAT            | 2010 - 2012   | F,M | 94  | 0.46 | 0.92 | 0.00          | 16.5 | 13.3 - 18.7 | 27.5 | 21.1 - 36.1 | 38.6 | 36.3 - 43.8 | 42.7 | 38.8 - 73.6 | 15.7 | 13.6 - 18.2 |
| 12-19 | sU     | DK      | DYMS 2013       | 2013          | M   | 70  | 0.07 | 0.07 | 0.00          | 9.69 | 8.13 - 11.3 | 14.7 | 11.7 - 16.3 | 19.3 | 16.0 - 32.5 | 24.9 |             | 9.54 | 7.93 - 11.5 |
| 12-19 | mU     | DE      | GerES V         | 2015 - 2017   | F,M | 932 |      | 0.20 | 0.00          | 8.90 | 8.30 - 9.54 | 15.1 | 14.2 - 15.9 | 23.7 | 21.6 - 25.8 | 33.0 | 30.2 - 40.3 | 9.08 | 8.63 - 9.55 |
| 12-19 | mU     | SK      | PCBcohort_t     | 2015 - 2017   | F,M | 65  | 0.23 |      | 0.00          | 28.7 | 21.8 - 37.1 | 42.2 | 38.6 - 69.4 | 79.3 | 64.9 - 149  | 104  |             | 26.6 | 21.5 - 33.1 |
| 12-19 | sU     | DK      | DYMS 2017       | 2017          | M   | 76  | 0.07 | 0.07 | 0.00          | 6.85 | 5.63 - 8.44 | 10.3 | 8.92 - 11.4 | 13.4 | 11.2 - 24.4 | 19.0 | 13.5 - 43.4 | 6.89 | 5.96 - 7.96 |
| 20-39 | 24hU   | DE      | ESB 2007        | 2007          | F,M | 60  |      | 0.20 | 0.00          | 12.7 | 9.12 - 14.5 | 19.9 | 14.5 - 28.6 | 31.1 | 27.2 - 165  | 46.6 |             | 13.3 | 10.6 - 16.6 |
| 20-39 | sU     | DK      | DYMS 2008       | 2008          | M   | 54  | 0.55 | 0.55 | 0.00          | 16.2 | 14.0 - 21.9 | 25.4 | 22.0 - 41.3 | 44.9 | 33.4 - 50.3 | 48.9 |             | 17.1 | 14.1 - 20.7 |
| 20-39 | 24hU   | DE      | ESB 2008        | 2008          | F,M | 54  |      | 0.50 | 0.00          | 9.66 | 7.63 - 11.5 | 13.5 | 11.5 - 19.0 | 21.2 | 18.3 - 25.1 | 23.6 |             | 9.31 | 7.91 - 10.9 |
| 20-39 | sU     | DK      | DYMS 2009       | 2009          | M   | 79  | 0.07 | 0.07 | 0.00          | 15.9 | 12.4 - 19.2 | 23.9 | 20.1 - 27.5 | 32.4 | 27.2 - 39.1 | 36.3 | 32.5 - 740  | 15.0 | 12.5 - 18.1 |
| 20-39 | 24hU   | DE      | ESB 2009        | 2009          | F,M | 60  |      | 0.20 | 0.00          | 8.85 | 6.20 - 11.4 | 14.1 | 11.5 - 21.2 | 27.3 | 19.5 - 40.4 | 38.8 |             | 9.13 | 7.44 - 11.2 |
| 20-39 | sU     | AT      | PBAT            | 2010 - 2011   | F,M | 135 | 0.46 | 0.92 | 1.48          | 8.89 | 7.41 - 9.89 | 14.0 | 11.7 - 17.2 | 21.3 | 18.2 - 33.1 | 33.0 | 24.6 - 74.9 | 8.07 | 6.88 - 9.46 |
| 20-39 | mU     | SE      | DEMOCOPHES-SE   | 2011 - 2012   | F   | 50  |      | 0.30 | 0.00          | 11.1 | 7.89 - 13.7 | 19.2 | 13.4 - 30.0 | 33.9 | 28.1 - 133  | 72.9 |             | 11.7 | 8.97 - 15.3 |

| Age   | Matrix | Country | Data collection | Sampling year | Sex | N   | LOD  | LOQ  | % below limit | P50  | P50_95% CI  | P75  | P75_95% CI  | P90  | P90_95% CI  | P95  | P95_95% CI  | GM   | GM_95% CI   |
|-------|--------|---------|-----------------|---------------|-----|-----|------|------|---------------|------|-------------|------|-------------|------|-------------|------|-------------|------|-------------|
| 20-39 | mU     | DK      | DEMOCOPHES-DK   | 2011          | F   | 51  |      | 0.55 | 0.00          | 10.4 | 7.71 - 11.5 | 14.5 | 11.5 - 20.0 | 20.6 | 16.6 - 39.2 | 33.9 |             | 9.23 | 7.50 - 11.4 |
| 20-39 | mU     | DE      | DEMOCOPHES-DE   | 2011          | F   | 64  |      | 0.20 | 0.00          | 15.6 | 12.7 - 19.5 | 30.0 | 22.3 - 40.4 | 41.8 | 34.1 - 63.1 | 52.9 |             | 16.6 | 13.9 - 19.9 |
| 20-39 | 24hU   | DE      | ESB 2011        | 2011          | F,M | 60  |      | 0.20 | 0.00          | 7.30 | 6.70 - 9.30 | 11.6 | 9.46 - 15.9 | 16.9 | 14.5 - 24.7 | 20.1 |             | 8.09 | 6.97 - 9.39 |
| 20-39 | sU     | IL      | IBS             | 2011          | F,M | 144 | 0.25 | 0.50 | 0.00          | 34.4 | 29.7 - 37.7 | 57.1 | 47.2 - 71.3 | 106  | 80.3 - 141  | 142  | 119 - 246   | 32.7 | 28.2 - 38.0 |
| 20-39 | 24hU   | DE      | ESB 2013        | 2013          | F,M | 60  |      | 0.20 | 0.00          | 5.90 | 4.81 - 7.00 | 9.32 | 7.08 - 11.8 | 12.2 | 10.3 - 19.3 | 14.8 |             | 5.88 | 5.03 - 6.86 |
| 20-39 | 24hU   | DE      | ESB 2015        | 2015          | F,M | 60  |      | 0.20 | 0.00          | 3.80 | 3.30 - 5.09 | 6.53 | 5.10 - 8.54 | 10.6 | 7.73 - 20.9 | 14.0 |             | 4.37 | 3.66 - 5.23 |
| 40-59 | sU     | AT      | PBAT            | 2010 - 2011   | F,M | 112 | 0.46 | 0.92 | 4.46          | 7.26 | 5.74 - 8.21 | 12.1 | 10.3 - 13.7 | 16.3 | 14.2 - 23.1 | 21.9 | 17.6 - 31.5 | 6.15 | 5.19 - 7.30 |
| 40-59 | mU     | DK      | DEMOCOPHES-DK   | 2011          | F   | 94  |      | 0.55 | 0.00          | 8.05 | 7.17 - 9.93 | 11.9 | 10.7 - 14.0 | 18.6 | 14.1 - 28.5 | 24.9 | 18.8 - 302  | 8.45 | 7.14 - 10.0 |
| 40-59 | mU     | DE      | DEMOCOPHES-DE   | 2011          | F   | 56  |      | 0.20 | 0.00          | 9.83 | 8.03 - 14.2 | 19.6 | 14.4 - 24.7 | 28.9 | 24.0 - 52.3 | 39.0 |             | 11.3 | 9.27 - 13.8 |
| 40-59 | sU     | IL      | IBS             | 2011          | F,M | 86  | 0.25 | 0.50 | 0.00          | 33.5 | 26.1 - 41.6 | 61.6 | 46.4 - 78.6 | 103  | 74.3 - 140  | 122  | 104 - 265   | 33.0 | 27.3 - 39.8 |
| 6-59  | mU     | AT      | IC-HBM          | 2009          | F   | 50  | 0.35 | 1.30 | 0.00          | 14.0 | 11.0 - 22.3 | 26.0 | 21.9 - 41.8 | 76.9 | 30.2 - 306  | 146  |             | 18.6 | 13.9 - 24.8 |
| 6-59  | mU     | AT      | IC-HBM          | 2009          | F,M | 50  | 0.35 | 1.30 | 0.00          | 32.5 | 28.1 - 40.6 | 51.5 | 39.9 - 70.8 | 96.0 | 66.0 - 112  | 105  |             | 33.0 | 27.3 - 40.0 |
| 60+   | sU     | AT      | PBAT            | 2010 - 2012   | F,M | 89  | 0.46 | 0.92 | 1.12          | 9.70 | 7.87 - 13.9 | 20.5 | 16.8 - 25.8 | 31.5 | 25.8 - 63.0 | 51.9 | 32.9 - 134  | 10.1 | 8.11 - 12.6 |

Notes. Matrix: mU - first morning urine, sU - spot urine, 24hU - 24-hours urine; country: AT - Austria, BE - Belgium, CZ - Czech Republic, DE - Germany, DK - Denmark, ES - Spain, HU - Hungary, IL - Israel, LU - Luxemburg, NO - Norway, PL - Poland, SE - Sweden, SI - Slovenia, SK - Slovakia; sex: F - female, M - male; n - sample size; LOD - limit of detection; LOQ - limit of quantification; % below limit - percentage of values below limit of detection/quantification, whichever was applied in the data collection; P50, P75, P90, P95 - 50th, 75th, 90th, 95th percentile; 95% CI - 95 % confidence interval; GM - geometric mean; NA - Not available.

Data only displayed if n was at least 50; percentiles missing when below LOD/LOQ; CIs of the observed percentiles missing when they fall outside the observed range; GM was imputed (fixed imputation) based on a log-normal distribution when at least 50 % of values were above LOD/LOQ.

**Table S6: DnBP metabolite MnBP (Mono-n-butyl phthalate) in microg/L**

| Age   | Matrix | Country | Data collection | Sampling year | Sex | N   | LOD  | LOQ  | % below limit | P50  | P50_95% CI  | P75  | P75_95% CI  | P90  | P90_95% CI  | P95  | P95_95% CI  | GM   | GM_95% CI   |
|-------|--------|---------|-----------------|---------------|-----|-----|------|------|---------------|------|-------------|------|-------------|------|-------------|------|-------------|------|-------------|
| 3-5   | mU     | DE      | GerES IV 2005   | 2005          | F,M | 50  |      | 0.10 | 0.00          | 113  | 88.8 - 165  | 197  | 163 - 264   | 280  | 222 - 360   | 326  |             | 119  | 99.6 - 143  |
| 3-5   | mU     | DE      | GerES V         | 2015 - 2017   | F,M | 388 |      | 1.00 | 0.26          | 25.4 | 23.1 - 27.4 | 39.8 | 37.5 - 41.5 | 64.2 | 54.4 - 70.9 | 85.9 | 70.5 - 118  | 25.1 | 23.3 - 27.1 |
| 3-5   | sU     | SK      | Children cohort | 2015 - 2016   | F,M | 67  |      | 1.00 | 0.00          | 49.0 | 36.5 - 66.8 | 95.6 | 68.3 - 155  | 171  | 132 - 258   | 209  |             | 50.0 | 40.1 - 62.3 |
| 3-5   | mU     | CZ      | CzechHBM-CE     | 2016 - 2017   | F,M | 148 |      | 1.60 | 0.00          | 61.6 | 58.2 - 68.0 | 105  | 89.5 - 137  | 192  | 148 - 231   | 233  | 207 - 337   | 65.5 | 57.8 - 74.1 |
| 6-11  | mU     | DE      | GerES IV 2005   | 2005          | F,M | 102 |      | 0.10 | 0.00          | 104  | 93.8 - 134  | 177  | 140 - 200   | 237  | 202 - 318   | 314  | 242 - 450   | 108  | 94.7 - 122  |
| 6-11  | mU     | DK      | CPHPUB-Cross    | 2006 - 2008   | F,M | 913 | 1.43 |      | 0.00          | 52.0 | 49.1 - 54.5 | 81.5 | 77.5 - 86.0 | 113  | 108 - 130   | 156  | 144 - 173   | 52.3 | 50.1 - 54.6 |
| 6-11  | sU     | AT      | PBAT            | 2010 - 2012   | F,M | 165 | 0.53 | 1.06 | 0.61          | 12.8 | 11.0 - 15.2 | 25.0 | 21.0 - 29.5 | 32.9 | 30.7 - 43.9 | 44.0 | 36.8 - 50.6 | 13.0 | 11.6 - 14.7 |
| 6-11  | mU     | DK      | DEMOCOPHES-DK   | 2011          | F,M | 143 |      | 1.43 | 0.00          | 31.8 | 26.7 - 36.1 | 49.8 | 43.2 - 60.0 | 78.4 | 64.3 - 97.9 | 98.3 | 85.5 - 107  | 30.8 | 27.5 - 34.5 |
| 6-11  | mU     | ES      | DEMOCOPHES-ES   | 2011 - 2012   | F,M | 120 |      | 1.00 | 0.00          | 47.4 | 41.6 - 56.1 | 74.2 | 62.6 - 91.2 | 116  | 96.1 - 167  | 163  | 126 - 197   | 46.1 | 40.4 - 52.7 |
| 6-11  | mU     | SL      | DEMOCOPHES-SI   | 2011 - 2012   | F,M | 119 |      | 0.50 | 0.00          | 38.0 | 31.4 - 48.2 | 67.5 | 54.3 - 78.0 | 106  | 80.8 - 141  | 139  | 109 - 192   | 40.0 | 35.0 - 45.7 |
| 6-11  | mU     | LU      | DEMOCOPHES-LU   | 2011 - 2012   | F,M | 60  |      | 0.50 | 0.00          | 31.0 | 21.0 - 35.0 | 42.2 | 35.8 - 49.7 | 54.7 | 45.6 - 80.6 | 67.7 |             | 25.7 | 21.6 - 30.7 |
| 6-11  | mU     | DE      | DEMOCOPHES-DE   | 2011          | F,M | 119 |      | 1.00 | 0.00          | 45.9 | 38.0 - 54.1 | 72.5 | 59.1 - 88.6 | 149  | 92.7 - 178  | 173  | 156 - 267   | 45.9 | 39.9 - 52.9 |
| 6-11  | mU     | BE      | DEMOCOPHES-BE   | 2011 - 2012   | F,M | 129 |      | 0.50 | 0.00          | 39.0 | 33.0 - 43.0 | 57.0 | 51.4 - 68.0 | 96.4 | 75.1 - 121  | 121  | 99.6 - 212  | 37.0 | 32.5 - 42.1 |
| 6-11  | mU     | PL      | DEMOCOPHES-PL   | 2011 - 2012   | F,M | 120 |      | 0.50 | 0.00          | 82.5 | 74.0 - 90.1 | 122  | 101 - 160   | 260  | 181 - 271   | 271  | 262 - 396   | 83.2 | 72.7 - 95.1 |
| 6-11  | mU     | CZ      | DEMOCOPHES-CZ   | 2011 - 2012   | F,M | 118 | 0.18 | 0.40 | 2.54          | 82.0 | 67.2 - 91.6 | 131  | 118 - 159   | 206  | 172 - 286   | 259  | 220 - 569   | 81.0 | 70.1 - 93.5 |
| 6-11  | mU     | NO      | IES             | 2012          | F,M | 50  | 0.20 | 0.50 | 0.00          | 38.8 | 31.2 - 46.9 | 60.8 | 46.3 - 82.9 | 88.7 | 66.6 - 133  | 119  |             | 40.8 | 34.5 - 48.3 |
| 6-11  | mU     | SK      | PCBcohort_c     | 2014 - 2016   | F,M | 249 | 0.67 |      | 0.00          | 74.5 | 66.2 - 83.4 | 127  | 110 - 139   | 222  | 175 - 253   | 287  | 241 - 351   | 74.7 | 67.7 - 82.4 |
| 6-11  | mU     | DE      | GerES V         | 2015 - 2017   | F,M | 937 |      | 1.00 | 0.11          | 22.7 | 21.9 - 23.7 | 37.1 | 34.4 - 39.0 | 55.9 | 53.4 - 58.9 | 69.5 | 64.7 - 79.5 | 22.6 | 21.6 - 23.7 |
| 6-11  | sU     | SK      | Children cohort | 2015 - 2016   | F,M | 112 |      | 1.00 | 0.00          | 51.8 | 40.5 - 69.4 | 86.0 | 74.7 - 105  | 148  | 108 - 203   | 203  | 155 - 236   | 47.4 | 40.0 - 56.1 |
| 6-11  | mU     | CZ      | CzechHBM-CE     | 2016 - 2017   | F,M | 223 |      | 1.60 | 0.00          | 63.2 | 53.3 - 68.4 | 103  | 88.0 - 120  | 172  | 135 - 210   | 230  | 191 - 275   | 61.4 | 55.6 - 67.8 |
| 12-19 | mU     | DE      | GerES IV 2005   | 2005          | F,M | 51  |      | 0.10 | 0.00          | 81.4 | 61.6 - 95.5 | 131  | 95.4 - 165  | 187  | 136 - 285   | 242  |             | 81.4 | 67.0 - 98.9 |
| 12-19 | mU     | DK      | CPHPUB-Cross    | 2006 - 2008   | F,M | 389 | 1.43 |      | 0.00          | 40.0 | 37.4 - 43.8 | 60.1 | 55.5 - 64.4 | 86.3 | 82.4 - 100  | 113  | 98.3 - 133  | 38.7 | 36.2 - 41.5 |
| 12-19 | sU     | DK      | DYMS 2007       | 2007          | M   | 239 | 1.10 | 1.10 | 1.26          | 33.7 | 29.2 - 38.6 | 52.6 | 47.4 - 58.3 | 82.2 | 67.3 - 93.0 | 99.4 | 86.4 - 118  | 29.6 | 26.3 - 33.2 |
| 12-19 | sU     | DK      | DYMS 2008       | 2008          | M   | 261 | 1.10 | 1.10 | 0.38          | 26.8 | 23.1 - 30.5 | 40.3 | 37.6 - 47.4 | 60.9 | 55.5 - 71.6 | 76.8 | 66.1 - 90.2 | 23.9 | 21.6 - 26.4 |
| 12-19 | mU     | BE      | FLEHS2RefAdo    | 2008 - 2009   | F,M | 210 | 10.0 |      | 2.38          | 38.5 | 36.0 - 45.6 | 61.8 | 55.5 - 67.0 | 87.3 | 74.6 - 109  | 117  | 94.8 - 251  | 39.7 | 35.8 - 43.9 |
| 12-19 | sU     | DK      | DYMS 2009       | 2009          | M   | 210 | 0.17 | 0.17 | 0.00          | 28.4 | 23.8 - 33.9 | 51.4 | 44.0 - 58.4 | 78.1 | 65.8 - 97.5 | 102  | 86.9 - 130  | 25.7 | 22.5 - 29.3 |
| 12-19 | sU     | AT      | PBAT            | 2010 - 2012   | F,M | 94  | 0.53 | 1.06 | 1.06          | 14.4 | 11.7 - 16.6 | 26.9 | 19.4 - 29.6 | 39.2 | 29.6 - 61.0 | 57.2 | 39.7 - 82.5 | 14.4 | 12.2 - 17.0 |
| 12-19 | sU     | DK      | DYMS 2013       | 2013          | M   | 70  | 0.17 | 0.17 | 0.00          | 29.5 | 21.6 - 31.9 | 37.4 | 32.6 - 49.1 | 59.4 | 45.4 - 86.9 | 69.6 |             | 21.4 | 17.1 - 26.7 |
| 12-19 | sU     | BE      | FLEHS3RefAdo    | 2013          | F,M | 207 |      | 0.50 | 0.00          | 24.3 | 21.3 - 27.2 | 37.1 | 31.5 - 43.2 | 61.0 | 50.0 - 69.6 | 77.6 | 64.6 - 108  | 22.8 | 20.6 - 25.4 |
| 12-19 | mU     | DE      | GerES V         | 2015 - 2017   | F,M | 932 |      | 1.00 | 0.00          | 19.8 | 18.7 - 20.7 | 33.0 | 31.1 - 34.7 | 49.5 | 45.1 - 56.6 | 67.3 | 60.7 - 74.8 | 19.8 | 18.8 - 20.7 |
| 12-19 | mU     | SK      | PCBcohort_t     | 2015 - 2017   | F,M | 65  | 0.67 |      | 0.00          | 83.1 | 62.9 - 106  | 138  | 115 - 178   | 200  | 167 - 360   | 232  |             | 82.2 | 68.0 - 99.3 |
| 12-19 | sU     | DK      | DYMS 2017       | 2017          | M   | 76  | 0.17 | 0.17 | 0.00          | 19.9 | 16.5 - 23.1 | 35.3 | 26.2 - 44.1 | 62.0 | 41.2 - 87.4 | 80.9 | 62.4 - 109  | 19.2 | 15.9 - 23.2 |
| 20-39 | 24hU   | DE      | ESB 2007        | 2007          | F,M | 60  |      | 1.00 | 0.00          | 16.4 | 11.0 - 20.9 | 23.9 | 21.0 - 29.6 | 34.0 | 27.2 - 47.8 | 37.3 |             | 15.0 | 12.5 - 17.9 |
| 20-39 | sU     | DK      | DYMS 2008       | 2008          | M   | 54  | 1.10 | 1.10 | 0.00          | 27.2 | 20.1 - 31.8 | 40.2 | 31.8 - 55.5 | 58.8 | 44.9 - 72.2 | 62.4 |             | 23.9 | 19.7 - 28.9 |

| Age   | Matrix | Country | Data collection | Sampling year | Sex | N   | LOD  | LOQ  | % below limit | P50  | P50_95% CI  | P75  | P75_95% CI   | P90  | P90_95% CI  | P95  | P95_95% CI  | GM   | GM_95% CI   |
|-------|--------|---------|-----------------|---------------|-----|-----|------|------|---------------|------|-------------|------|--------------|------|-------------|------|-------------|------|-------------|
| 20-39 | mU     | BE      | FLEHS2RefAdult  | 2008 - 2009   | F,M | 189 | 10.0 |      | 10.6          | 30.0 | 26.0 - 36.4 | 54.0 | 47.0 - 68.6  | 103  | 86.0 - 122  | 134  | 105 - 192   | 31.1 | 27.4 - 35.2 |
| 20-39 | 24hU   | DE      | ESB 2008        | 2008          | F,M | 54  |      | 2.00 | 0.00          | 19.4 | 16.9 - 23.7 | 26.1 | 23.7 - 32.4  | 37.4 | 27.7 - 69.2 | 63.8 |             | 18.8 | 15.9 - 22.1 |
| 20-39 | sU     | DK      | DYMS 2009       | 2009          | M   | 79  | 0.17 | 0.17 | 0.00          | 26.9 | 22.3 - 34.8 | 45.7 | 38.2 - 60.5  | 72.4 | 55.5 - 126  | 96.0 | 74.8 - 216  | 27.0 | 22.4 - 32.6 |
| 20-39 | 24hU   | DE      | ESB 2009        | 2009          | F,M | 60  |      | 1.00 | 0.00          | 16.3 | 11.9 - 20.3 | 23.9 | 20.9 - 37.0  | 42.5 | 31.4 - 54.1 | 48.9 |             | 15.3 | 12.5 - 18.6 |
| 20-39 | sU     | AT      | PBAT            | 2010 - 2011   | F,M | 135 | 0.53 | 1.06 | 0.74          | 8.31 | 7.33 - 10.3 | 15.0 | 12.6 - 18.5  | 27.6 | 21.7 - 43.7 | 43.5 | 29.9 - 54.8 | 8.92 | 7.72 - 10.3 |
| 20-39 | mU     | DK      | DEMOCOPHES-DK   | 2011          | F   | 51  |      | 1.43 | 0.00          | 24.3 | 17.8 - 30.9 | 38.7 | 30.7 - 57.6  | 66.2 | 48.5 - 105  | 73.0 |             | 23.2 | 18.5 - 29.0 |
| 20-39 | mU     | SL      | DEMOCOPHES-SI   | 2011 - 2012   | F   | 63  |      | 0.50 | 0.00          | 23.0 | 18.0 - 29.7 | 40.0 | 30.9 - 56.8  | 63.0 | 53.0 - 258  | 112  |             | 25.9 | 20.1 - 33.6 |
| 20-39 | mU     | DE      | DEMOCOPHES-DE   | 2011          | F   | 64  |      | 1.00 | 0.00          | 31.0 | 25.8 - 38.9 | 55.4 | 41.5 - 66.7  | 77.0 | 64.1 - 111  | 85.4 |             | 31.1 | 25.8 - 37.4 |
| 20-39 | mU     | BE      | DEMOCOPHES-BE   | 2011 - 2012   | F   | 62  |      | 0.50 | 0.00          | 26.5 | 22.9 - 31.0 | 38.2 | 31.2 - 62.6  | 73.3 | 53.4 - 124  | 119  |             | 26.7 | 21.6 - 33.0 |
| 20-39 | 24hU   | DE      | ESB 2011        | 2011          | F,M | 60  |      | 1.00 | 0.00          | 14.8 | 11.1 - 17.2 | 22.4 | 18.4 - 25.3  | 25.6 | 24.4 - 28.2 | 27.3 |             | 14.0 | 12.3 - 16.0 |
| 20-39 | mU     | PL      | DEMOCOPHES-PL   | 2011 - 2012   | F   | 88  |      | 0.50 | 0.00          | 43.5 | 38.4 - 54.6 | 76.0 | 60.8 - 93.7  | 126  | 92.0 - 174  | 169  | 138 - 565   | 45.1 | 37.7 - 53.8 |
| 20-39 | sU     | IL      | IBS             | 2011          | F,M | 144 | 1.00 | 2.00 | 0.00          | 27.1 | 23.5 - 31.8 | 50.5 | 44.0 - 69.9  | 91.1 | 75.0 - 99.9 | 100  | 92.0 - 170  | 28.5 | 24.5 - 33.0 |
| 20-39 | 24hU   | DE      | ESB 2013        | 2013          | F,M | 60  |      | 1.00 | 0.00          | 11.2 | 8.64 - 13.2 | 15.8 | 13.7 - 22.5  | 24.3 | 18.7 - 36.9 | 29.9 |             | 11.4 | 9.79 - 13.4 |
| 20-39 | 24hU   | DE      | ESB 2015        | 2015          | F,M | 60  |      | 1.00 | 0.00          | 8.00 | 6.90 - 8.89 | 10.7 | 9.21 - 16.3  | 20.3 | 12.9 - 33.5 | 21.3 |             | 8.21 | 6.99 - 9.66 |
| 20-39 | sU     | CZ      | CzechHBM-AE     | 2018 - 2019   | F,M | 194 |      | 3.04 | 0.00          | 20.3 | 18.6 - 22.4 | 34.3 | 30.2 - 46.6  | 65.2 | 52.5 - 81.6 | 86.5 | 77.0 - 112  | 22.8 | 20.6 - 25.3 |
| 40-59 | sU     | AT      | PBAT            | 2010 - 2011   | F,M | 112 | 0.53 | 1.06 | 4.46          | 6.43 | 5.60 - 8.58 | 12.3 | 10.00 - 16.1 | 20.1 | 17.6 - 33.2 | 31.0 | 20.2 - 54.3 | 6.58 | 5.51 - 7.86 |
| 40-59 | mU     | DK      | DEMOCOPHES-DK   | 2011          | F   | 94  |      | 1.43 | 0.00          | 18.7 | 15.8 - 22.6 | 30.3 | 25.3 - 33.3  | 38.9 | 33.4 - 54.4 | 50.1 | 40.1 - 102  | 18.7 | 16.3 - 21.4 |
| 40-59 | mU     | ES      | DEMOCOPHES-ES   | 2011 - 2012   | F   | 75  |      | 1.00 | 0.00          | 31.4 | 25.5 - 39.7 | 60.5 | 43.2 - 71.3  | 91.2 | 68.5 - 187  | 127  | 91.5 - 247  | 31.7 | 25.9 - 38.8 |
| 40-59 | mU     | SL      | DEMOCOPHES-SI   | 2011 - 2012   | F   | 57  |      | 0.50 | 0.00          | 29.0 | 22.0 - 32.0 | 48.0 | 32.0 - 61.5  | 78.0 | 54.2 - 177  | 102  |             | 28.3 | 23.1 - 34.7 |
| 40-59 | mU     | DE      | DEMOCOPHES-DE   | 2011          | F   | 56  |      | 1.00 | 0.00          | 24.7 | 21.3 - 37.2 | 49.1 | 38.4 - 79.1  | 98.0 | 60.4 - 169  | 128  |             | 29.6 | 23.9 - 36.7 |
| 40-59 | mU     | BE      | DEMOCOPHES-BE   | 2011 - 2012   | F   | 67  |      | 0.50 | 0.00          | 35.0 | 30.1 - 39.9 | 47.0 | 41.7 - 58.0  | 83.6 | 56.0 - 154  | 108  |             | 33.8 | 28.5 - 40.1 |
| 40-59 | sU     | IL      | IBS             | 2011          | F,M | 86  | 1.00 | 2.00 | 0.00          | 27.1 | 22.5 - 35.2 | 50.5 | 40.1 - 74.3  | 85.7 | 74.1 - 101  | 99.4 | 86.2 - 773  | 28.5 | 23.2 - 35.0 |
| 40-59 | sU     | CZ      | CzechHBM-AE     | 2018 - 2019   | F,M | 192 |      | 3.04 | 0.00          | 22.5 | 18.9 - 26.8 | 38.5 | 33.7 - 49.3  | 63.0 | 54.5 - 79.0 | 80.4 | 68.4 - 116  | 23.8 | 21.4 - 26.4 |
| 60+   | sU     | AT      | PBAT            | 2010 - 2012   | F,M | 89  | 0.53 | 1.06 | 2.25          | 10.2 | 8.39 - 12.2 | 16.5 | 13.4 - 25.7  | 42.3 | 25.4 - 58.3 | 55.3 | 43.2 - 81.7 | 10.7 | 8.78 - 13.1 |

Notes. Matrix: mU - first morning urine, sU - spot urine, 24hU - 24-hours urine; country: AT - Austria, BE - Belgium, CZ - Czech Republic, DE - Germany, DK - Denmark, ES - Spain, HU - Hungary, IL - Israel, LU - Luxembourg, NO - Norway, PL - Poland, SE - Sweden, SI - Slovenia, SK - Slovakia; sex: F - female, M - male; n - sample size; LOD - limit of detection; LOQ - limit of quantification; % below limit - percentage of values below limit of detection/quantification, whichever was applied in the data collection; P50, P75, P90, P95 - 50th, 75th, 90th, 95th percentile; 95% CI - 95 % confidence interval; GM - geometric mean; NA - Not available.

Data only displayed if n was at least 50; percentiles missing when below LOD/LOQ; CIs of the observed percentiles missing when they fall outside the observed range; GM was imputed (fixed imputation) based on a log-normal distribution when at least 50 % of values were above LOD/LOQ.

**Table S7: DnBP metabolite OH-MnBP (3-OH-Mono-n-butyl phthalate) in microg/L**

| Age   | Matrix | Country | Data collection | Sampling year | Sex | N   | LOD  | LOQ  | % below limit | P50  | P50_95% CI  | P75  | P75_95% CI  | P90  | P90_95% CI  | P95  | P95_95% CI  | GM   | GM_95% CI   |
|-------|--------|---------|-----------------|---------------|-----|-----|------|------|---------------|------|-------------|------|-------------|------|-------------|------|-------------|------|-------------|
| 3-5   | mU     | DE      | GerES V         | 2015 - 2017   | F,M | 388 |      | 0.25 | 0.00          | 3.30 | 3.10 - 3.70 | 5.50 | 5.06 - 5.90 | 8.90 | 7.55 - 10.5 | 11.6 | 10.1 - 13.4 | 3.30 | 3.05 - 3.56 |
| 3-5   | sU     | SK      | Children cohort | 2015 - 2016   | F,M | 67  |      | 0.25 | 0.00          | 8.31 | 5.36 - 9.20 | 13.2 | 9.34 - 21.1 | 21.5 | 20.2 - 38.5 | 34.2 |             | 7.35 | 5.90 - 9.16 |
| 6-11  | mU     | DE      | DEMOCOPHES-DE   | 2011          | F,M | 119 |      | 0.25 | 0.84          | 3.30 | 2.90 - 4.06 | 5.85 | 4.90 - 9.77 | 12.9 | 10.1 - 19.6 | 19.3 | 13.1 - 34.4 | 3.51 | 2.95 - 4.19 |
| 6-11  | mU     | DE      | GerES V         | 2015 - 2017   | F,M | 937 |      | 0.25 | 0.53          | 2.70 | 2.60 - 2.80 | 4.50 | 4.20 - 4.80 | 6.70 | 6.30 - 7.34 | 9.20 | 8.11 - 9.90 | 2.67 | 2.54 - 2.81 |
| 6-11  | sU     | SK      | Children cohort | 2015 - 2016   | F,M | 112 |      | 0.25 | 0.00          | 6.54 | 4.96 - 7.60 | 11.3 | 9.37 - 15.1 | 21.0 | 16.6 - 25.8 | 25.6 | 22.2 - 38.1 | 5.92 | 4.95 - 7.08 |
| 12-19 | sU     | DK      | DYMS 2009       | 2009          | M   | 69  | 0.25 | 0.25 | 13.0          | 2.88 | 2.09 - 3.65 | 5.16 | 4.05 - 6.75 | 8.12 | 6.29 - 12.3 | 9.52 |             | 2.19 | 1.65 - 2.91 |
| 12-19 | sU     | DK      | DYMS 2013       | 2013          | M   | 70  | 0.25 | 0.25 | 17.1          | 1.82 | 1.37 - 2.30 | 3.19 | 2.42 - 4.20 | 4.97 | 3.61 - 5.96 | 5.42 |             | 1.39 | 1.08 - 1.81 |
| 12-19 | mU     | DE      | GerES V         | 2015 - 2017   | F,M | 932 |      | 0.25 | 0.75          | 2.00 | 1.90 - 2.20 | 3.50 | 3.20 - 3.70 | 5.59 | 5.00 - 6.18 | 7.64 | 6.84 - 8.35 | 2.04 | 1.94 - 2.15 |
| 12-19 | sU     | DK      | DYMS 2017       | 2017          | M   | 76  | 0.25 | 0.25 | 17.1          | 1.37 | 1.02 - 1.90 | 2.37 | 2.06 - 3.37 | 4.77 | 2.90 - 7.26 | 6.67 | 4.91 - 10.6 | 1.13 | 0.87 - 1.47 |
| 20-39 | 24hU   | DE      | ESB 2007        | 2007          | F,M | 60  |      | 0.25 | 1.67          | 1.40 | 1.20 - 1.80 | 2.33 | 1.80 - 3.37 | 3.52 | 3.22 - 5.02 | 4.12 |             | 1.46 | 1.22 - 1.74 |
| 20-39 | 24hU   | DE      | ESB 2009        | 2009          | F,M | 60  |      | 0.25 | 0.00          | 1.40 | 1.10 - 1.80 | 2.42 | 1.80 - 3.14 | 3.41 | 2.96 - 5.45 | 3.67 |             | 1.34 | 1.10 - 1.63 |
| 20-39 | mU     | DE      | DEMOCOPHES-DE   | 2011          | F   | 64  |      | 0.25 | 3.12          | 1.85 | 1.58 - 2.74 | 3.67 | 2.90 - 4.89 | 5.80 | 4.71 - 12.4 | 9.54 |             | 2.03 | 1.62 - 2.54 |
| 20-39 | 24hU   | DE      | ESB 2011        | 2011          | F,M | 60  |      | 0.25 | 0.00          | 1.45 | 1.10 - 1.80 | 2.10 | 1.80 - 2.97 | 3.20 | 2.70 - 5.07 | 4.04 |             | 1.42 | 1.21 - 1.67 |
| 20-39 | 24hU   | DE      | ESB 2013        | 2013          | F,M | 60  |      | 0.25 | 0.00          | 1.10 | 0.80 - 1.40 | 1.65 | 1.40 - 2.20 | 2.41 | 2.06 - 4.57 | 3.04 |             | 1.08 | 0.91 - 1.28 |
| 20-39 | 24hU   | DE      | ESB 2015        | 2015          | F,M | 60  |      | 0.25 | 8.33          | 0.80 | 0.70 - 0.90 | 1.20 | 0.90 - 1.60 | 1.62 | 1.46 - 3.40 | 2.92 |             | 0.79 | 0.66 - 0.95 |
| 40-59 | mU     | DE      | DEMOCOPHES-DE   | 2011          | F   | 56  |      | 0.25 | 3.57          | 1.85 | 1.26 - 2.27 | 2.90 | 2.30 - 4.29 | 5.25 | 3.51 - 11.8 | 10.1 |             | 1.83 | 1.44 - 2.32 |

Notes. Matrix: mU - first morning urine, sU - spot urine, 24hU - 24-hours urine; country: AT - Austria, BE - Belgium, CZ - Czech Republic, DE - Germany, DK - Denmark, ES - Spain, HU - Hungary, IL - Israel, LU - Luxembourg, NO - Norway, PL - Poland, SE - Sweden, SI - Slovenia, SK - Slovakia; sex: F - female, M - male; n - sample size; LOD - limit of detection; LOQ - limit of quantification; % below limit - percentage of values below limit of detection/quantification, whichever was applied in the data collection; P50, P75, P90, P95 - 50th, 75th, 90th, 95th percentile; 95% CI - 95 % confidence interval; GM - geometric mean; NA - Not available.

Data only displayed if n was at least 50; percentiles missing when below LOD/LOQ; CIs of the observed percentiles missing when they fall outside the observed range; GM was imputed (fixed imputation) based on a log-normal distribution when at least 50 % of values were above LOD/LOQ.



**Table S8: DiBP metabolite MiBP (Mono-isobutyl phthalate) in microg/L**

| Age   | Matrix | Country | Data collection | Sampling year | Sex | N   | LOD  | LOQ  | % below limit | P50  | P50_95% CI  | P75  | P75_95% CI  | P90  | P90_95% CI  | P95  | P95_95% CI | GM   | GM_95% CI   |
|-------|--------|---------|-----------------|---------------|-----|-----|------|------|---------------|------|-------------|------|-------------|------|-------------|------|------------|------|-------------|
| 3-5   | mU     | DE      | GerES IV 2005   | 2005          | F,M | 50  |      | 0.10 | 0.00          | 97.2 | 76.3 - 120  | 146  | 118 - 255   | 277  | 175 - 511   | 322  |            | 103  | 84.1 - 127  |
| 3-5   | mU     | DE      | GerES V         | 2015 - 2017   | F,M | 388 |      | 1.00 | 0.00          | 29.7 | 27.7 - 31.6 | 53.7 | 48.8 - 59.4 | 85.1 | 74.7 - 101  | 114  | 100 - 151  | 30.2 | 27.8 - 32.9 |
| 3-5   | sU     | SK      | Children cohort | 2015 - 2016   | F,M | 67  |      | 1.00 | 0.00          | 40.3 | 29.2 - 54.4 | 76.3 | 61.0 - 97.6 | 109  | 93.7 - 130  | 121  |            | 37.2 | 29.7 - 46.5 |
| 3-5   | mU     | CZ      | CzechHBM-CE     | 2016 - 2017   | F,M | 148 |      | 2.70 | 0.00          | 41.1 | 36.7 - 48.3 | 72.4 | 60.4 - 97.0 | 165  | 112 - 238   | 238  | 174 - 395  | 45.0 | 38.8 - 52.2 |
| 6-11  | mU     | DE      | GerES IV 2005   | 2005          | F,M | 102 |      | 0.10 | 0.00          | 93.0 | 81.9 - 113  | 154  | 136 - 180   | 214  | 181 - 301   | 284  | 221 - 436  | 97.1 | 85.5 - 110  |
| 6-11  | mU     | DK      | CPHPUB-Cross    | 2006 - 2008   | F,M | 913 | 1.10 |      | 0.00          | 79.3 | 76.4 - 83.0 | 126  | 118 - 137   | 180  | 171 - 200   | 241  | 220 - 276  | 81.4 | 77.9 - 85.1 |
| 6-11  | sU     | AT      | PBAT            | 2010 - 2012   | F,M | 165 | 0.59 | 1.18 | 1.21          | 35.2 | 28.9 - 39.1 | 57.3 | 51.7 - 67.9 | 91.3 | 78.1 - 122  | 125  | 104 - 145  | 32.4 | 28.4 - 37.1 |
| 6-11  | mU     | DK      | DEMOCOPHES-DK   | 2011          | F,M | 143 |      | 1.10 | 0.00          | 53.8 | 48.2 - 63.7 | 89.8 | 79.5 - 106  | 140  | 112 - 192   | 192  | 152 - 217  | 56.7 | 50.4 - 63.7 |
| 6-11  | mU     | ES      | DEMOCOPHES-ES   | 2011 - 2012   | F,M | 120 |      | 1.00 | 0.00          | 55.6 | 47.8 - 64.9 | 91.0 | 77.7 - 107  | 133  | 114 - 180   | 178  | 140 - 229  | 55.7 | 49.1 - 63.2 |
| 6-11  | mU     | SL      | DEMOCOPHES-SI   | 2011 - 2012   | F,M | 119 |      | 1.00 | 0.00          | 55.0 | 50.0 - 66.6 | 93.5 | 78.6 - 125  | 149  | 128 - 227   | 225  | 164 - 237  | 57.8 | 50.6 - 66.0 |
| 6-11  | mU     | LU      | DEMOCOPHES-LU   | 2011 - 2012   | F,M | 60  |      | 0.50 | 0.00          | 34.5 | 27.0 - 45.0 | 54.8 | 45.0 - 65.7 | 79.7 | 59.6 - 232  | 115  |            | 32.6 | 25.7 - 41.4 |
| 6-11  | mU     | DE      | DEMOCOPHES-DE   | 2011          | F,M | 119 |      | 1.00 | 0.00          | 37.7 | 33.8 - 46.0 | 64.1 | 55.3 - 79.5 | 109  | 96.1 - 164  | 154  | 116 - 238  | 40.9 | 35.6 - 47.0 |
| 6-11  | mU     | BE      | DEMOCOPHES-BE   | 2011 - 2012   | F,M | 129 |      | 0.50 | 0.00          | 48.0 | 41.0 - 63.1 | 96.0 | 81.4 - 116  | 178  | 125 - 359   | 356  | 196 - 777  | 55.7 | 47.1 - 65.8 |
| 6-11  | mU     | PL      | DEMOCOPHES-PL   | 2011 - 2012   | F,M | 120 |      | 0.50 | 0.00          | 104  | 89.0 - 111  | 180  | 131 - 206   | 261  | 212 - 302   | 273  | 265 - 572  | 101  | 88.0 - 116  |
| 6-11  | mU     | CZ      | DEMOCOPHES-CZ   | 2011 - 2012   | F,M | 118 | 0.07 | 0.20 | 0.00          | 52.0 | 41.1 - 65.2 | 84.3 | 71.8 - 105  | 135  | 110 - 184   | 182  | 147 - 250  | 47.2 | 39.5 - 56.4 |
| 6-11  | mU     | NO      | IES             | 2012          | F,M | 50  | 0.20 | 0.50 | 0.00          | 48.5 | 33.3 - 56.8 | 75.5 | 54.4 - 128  | 143  | 91.0 - 227  | 160  |            | 48.3 | 39.5 - 59.0 |
| 6-11  | mU     | SK      | PCBcohort_c     | 2014 - 2016   | F,M | 249 | 0.67 |      | 0.40          | 61.5 | 51.7 - 70.8 | 108  | 94.3 - 129  | 176  | 143 - 215   | 246  | 202 - 487  | 59.8 | 53.1 - 67.3 |
| 6-11  | mU     | DE      | GerES V         | 2015 - 2017   | F,M | 937 |      | 1.00 | 0.11          | 27.6 | 26.3 - 28.8 | 43.1 | 40.3 - 46.6 | 75.2 | 68.2 - 86.4 | 113  | 101 - 140  | 27.8 | 26.4 - 29.3 |
| 6-11  | sU     | SK      | Children cohort | 2015 - 2016   | F,M | 112 |      | 1.00 | 0.00          | 45.9 | 40.6 - 63.4 | 104  | 74.5 - 146  | 172  | 153 - 329   | 322  | 212 - 460  | 52.9 | 43.6 - 64.2 |
| 6-11  | mU     | CZ      | CzechHBM-CE     | 2016 - 2017   | F,M | 223 |      | 2.70 | 0.00          | 37.4 | 34.4 - 45.7 | 72.5 | 57.6 - 85.7 | 138  | 104 - 180   | 214  | 148 - 407  | 43.4 | 38.8 - 48.6 |
| 12-19 | mU     | DE      | GerES IV 2005   | 2005          | F,M | 51  |      | 0.10 | 0.00          | 81.5 | 55.9 - 99.8 | 127  | 99.5 - 200  | 327  | 159 - 1338  | 457  |            | 90.4 | 70.3 - 116  |
| 12-19 | mU     | DK      | CPHPUB-Cross    | 2006 - 2008   | F,M | 389 | 1.10 |      | 0.00          | 74.0 | 67.0 - 79.6 | 111  | 102 - 128   | 154  | 148 - 177   | 201  | 177 - 241  | 70.1 | 65.5 - 75.1 |
| 12-19 | sU     | DK      | DYMS 2007       | 2007          | M   | 239 | 1.43 | 1.43 | 0.00          | 48.3 | 43.7 - 53.6 | 79.1 | 70.5 - 90.4 | 125  | 106 - 145   | 167  | 135 - 229  | 47.3 | 42.2 - 53.1 |
| 12-19 | sU     | DK      | DYMS 2008       | 2008          | M   | 261 | 1.43 | 1.43 | 0.00          | 63.0 | 55.0 - 67.3 | 90.8 | 84.0 - 99.8 | 140  | 116 - 165   | 172  | 155 - 202  | 55.5 | 50.3 - 61.1 |
| 12-19 | sU     | DK      | DYMS 2009       | 2009          | M   | 210 | 0.16 | 0.16 | 0.00          | 47.4 | 39.1 - 54.8 | 73.2 | 64.2 - 89.8 | 121  | 104 - 156   | 174  | 139 - 344  | 43.8 | 38.8 - 49.6 |
| 12-19 | sU     | AT      | PBAT            | 2010 - 2012   | F,M | 94  | 0.59 | 1.18 | 0.00          | 39.6 | 33.7 - 48.1 | 71.7 | 55.9 - 104  | 125  | 105 - 148   | 137  | 127 - 203  | 41.1 | 34.9 - 48.3 |
| 12-19 | sU     | DK      | DYMS 2013       | 2013          | M   | 70  | 0.16 | 0.16 | 0.00          | 29.5 | 21.0 - 35.5 | 43.0 | 36.1 - 54.1 | 59.2 | 52.5 - 104  | 87.2 |            | 24.7 | 20.2 - 30.2 |
| 12-19 | sU     | BE      | FLEHS3RefAdo    | 2013          | F,M | 207 |      | 0.50 | 0.00          | 24.8 | 21.3 - 27.8 | 40.8 | 36.7 - 49.5 | 66.6 | 56.9 - 93.1 | 99.5 | 81.7 - 170 | 24.3 | 21.6 - 27.4 |
| 12-19 | mU     | DE      | GerES V         | 2015 - 2017   | F,M | 932 |      | 1.00 | 0.00          | 22.0 | 20.4 - 23.5 | 39.0 | 36.2 - 42.7 | 67.2 | 60.2 - 80.6 | 104  | 89.9 - 117 | 23.6 | 22.4 - 25.0 |
| 12-19 | mU     | SK      | PCBcohort_t     | 2015 - 2017   | F,M | 65  | 0.67 |      | 0.00          | 56.9 | 41.2 - 74.2 | 124  | 80.8 - 161  | 207  | 135 - 323   | 258  |            | 59.2 | 46.8 - 74.8 |
| 12-19 | sU     | DK      | DYMS 2017       | 2017          | M   | 76  | 0.16 | 0.16 | 0.00          | 20.9 | 16.4 - 23.7 | 32.9 | 27.3 - 41.0 | 45.3 | 40.4 - 75.8 | 61.5 | 45.3 - 129 | 19.8 | 16.6 - 23.5 |
| 20-39 | 24hU   | DE      | ESB 2007        | 2007          | F,M | 60  |      | 1.00 | 0.00          | 19.3 | 16.3 - 25.3 | 34.5 | 25.7 - 44.2 | 47.5 | 41.4 - 97.2 | 79.3 |            | 21.8 | 18.3 - 25.9 |
| 20-39 | sU     | DK      | DYMS 2008       | 2008          | M   | 54  | 1.43 | 1.43 | 0.00          | 64.0 | 55.2 - 91.8 | 106  | 91.8 - 135  | 147  | 122 - 181   | 158  |            | 62.6 | 52.1 - 75.3 |
| 20-39 | 24hU   | DE      | ESB 2008        | 2008          | F,M | 54  |      | 2.00 | 0.00          | 24.5 | 19.7 - 31.5 | 36.7 | 31.6 - 49.8 | 58.2 | 40.0 - 194  | 98.1 |            | 26.8 | 22.2 - 32.2 |

| Age   | Matrix | Country | Data collection | Sampling year | Sex | N   | LOD  | LOQ  | % below limit | P50  | P50_95% CI  | P75  | P75_95% CI  | P90  | P90_95% CI  | P95  | P95_95% CI  | GM   | GM_95% CI   |
|-------|--------|---------|-----------------|---------------|-----|-----|------|------|---------------|------|-------------|------|-------------|------|-------------|------|-------------|------|-------------|
| 20-39 | sU     | DK      | DYMS 2009       | 2009          | M   | 79  | 0.16 | 0.16 | 0.00          | 55.6 | 45.3 - 68.3 | 96.9 | 74.2 - 110  | 151  | 108 - 281   | 202  | 151 - 522   | 53.3 | 43.8 - 64.9 |
| 20-39 | 24hU   | DE      | ESB 2009        | 2009          | F,M | 60  |      | 1.00 | 0.00          | 19.6 | 15.8 - 24.4 | 28.1 | 24.6 - 38.7 | 58.1 | 36.9 - 105  | 79.4 |             | 20.4 | 17.0 - 24.5 |
| 20-39 | sU     | AT      | PBAT            | 2010 - 2011   | F,M | 135 | 0.59 | 1.18 | 2.22          | 24.7 | 21.5 - 27.7 | 42.1 | 33.4 - 57.5 | 79.2 | 66.9 - 108  | 108  | 81.7 - 118  | 23.4 | 19.7 - 27.7 |
| 20-39 | mU     | DK      | DEMOCOPHES-DK   | 2011          | F   | 51  |      | 1.10 | 0.00          | 41.0 | 33.0 - 56.5 | 77.8 | 55.8 - 103  | 114  | 84.2 - 190  | 151  |             | 43.7 | 35.0 - 54.6 |
| 20-39 | mU     | SL      | DEMOCOPHES-SI   | 2011 - 2012   | F   | 63  |      | 1.00 | 0.00          | 39.0 | 35.0 - 50.0 | 62.0 | 51.7 - 80.1 | 86.6 | 69.4 - 142  | 112  |             | 38.9 | 32.4 - 46.6 |
| 20-39 | mU     | DE      | DEMOCOPHES-DE   | 2011          | F   | 64  |      | 1.00 | 0.00          | 29.0 | 22.2 - 36.9 | 41.6 | 37.3 - 45.3 | 53.6 | 44.1 - 97.5 | 86.4 |             | 27.3 | 23.2 - 32.1 |
| 20-39 | mU     | BE      | DEMOCOPHES-BE   | 2011 - 2012   | F   | 62  |      | 0.50 | 0.00          | 32.5 | 27.0 - 47.2 | 61.0 | 49.5 - 87.8 | 112  | 71.1 - 209  | 126  |             | 35.4 | 28.3 - 44.4 |
| 20-39 | 24hU   | DE      | ESB 2011        | 2011          | F,M | 60  |      | 1.00 | 0.00          | 20.2 | 16.9 - 23.9 | 30.9 | 25.3 - 37.5 | 40.3 | 32.1 - 54.5 | 50.8 |             | 19.6 | 16.8 - 22.9 |
| 20-39 | mU     | PL      | DEMOCOPHES-PL   | 2011 - 2012   | F   | 88  |      | 0.50 | 0.00          | 50.0 | 44.4 - 58.8 | 84.2 | 68.8 - 106  | 147  | 105 - 234   | 190  | 153 - 538   | 51.4 | 43.0 - 61.4 |
| 20-39 | sU     | IL      | IBS             | 2011          | F,M | 144 | 1.00 | 2.00 | 0.00          | 38.1 | 34.0 - 46.2 | 67.7 | 61.2 - 78.7 | 89.8 | 82.2 - 97.8 | 97.9 | 92.9 - 211  | 36.3 | 31.7 - 41.6 |
| 20-39 | 24hU   | DE      | ESB 2013        | 2013          | F,M | 60  |      | 1.00 | 0.00          | 16.4 | 13.3 - 17.9 | 24.2 | 19.0 - 33.0 | 43.5 | 27.2 - 52.7 | 52.5 |             | 16.3 | 13.9 - 19.1 |
| 20-39 | 24hU   | DE      | ESB 2015        | 2015          | F,M | 60  |      | 1.00 | 0.00          | 9.80 | 8.61 - 11.6 | 13.3 | 11.7 - 19.2 | 23.7 | 17.2 - 71.7 | 33.4 |             | 10.9 | 8.82 - 13.5 |
| 20-39 | sU     | CZ      | CzechHBM-AE     | 2018 - 2019   | F,M | 194 |      | 2.17 | 0.00          | 11.8 | 10.8 - 13.7 | 21.6 | 17.4 - 25.8 | 41.2 | 30.2 - 51.3 | 52.9 | 42.9 - 76.4 | 13.4 | 12.1 - 15.0 |
| 40-59 | sU     | AT      | PBAT            | 2010 - 2011   | F,M | 112 | 0.59 | 1.18 | 6.25          | 22.9 | 19.8 - 27.2 | 34.9 | 29.6 - 41.4 | 50.5 | 43.5 - 101  | 94.4 | 53.1 - 130  | 18.2 | 14.5 - 22.7 |
| 40-59 | mU     | DK      | DEMOCOPHES-DK   | 2011          | F   | 94  |      | 1.10 | 0.00          | 35.9 | 30.1 - 42.0 | 49.4 | 45.0 - 61.7 | 73.7 | 61.9 - 98.7 | 85.9 | 74.5 - 166  | 33.8 | 29.6 - 38.5 |
| 40-59 | mU     | ES      | DEMOCOPHES-ES   | 2011 - 2012   | F   | 75  |      | 1.00 | 0.00          | 39.5 | 28.0 - 49.5 | 61.5 | 50.8 - 70.3 | 86.8 | 67.8 - 135  | 106  | 86.9 - 199  | 35.5 | 29.9 - 42.2 |
| 40-59 | mU     | SL      | DEMOCOPHES-SI   | 2011 - 2012   | F   | 57  |      | 1.00 | 0.00          | 39.0 | 27.7 - 48.5 | 63.0 | 49.4 - 74.3 | 84.0 | 68.1 - 156  | 144  |             | 37.8 | 31.4 - 45.6 |
| 40-59 | mU     | DE      | DEMOCOPHES-DE   | 2011          | F   | 56  |      | 1.00 | 0.00          | 17.5 | 14.8 - 26.8 | 38.0 | 28.3 - 51.0 | 57.4 | 44.9 - 92.8 | 89.3 |             | 21.2 | 17.4 - 25.9 |
| 40-59 | mU     | BE      | DEMOCOPHES-BE   | 2011 - 2012   | F   | 67  |      | 0.50 | 0.00          | 31.0 | 27.1 - 46.9 | 64.0 | 50.7 - 102  | 116  | 96.3 - 260  | 176  |             | 38.6 | 30.9 - 48.3 |
| 40-59 | sU     | IL      | IBS             | 2011          | F,M | 86  | 1.00 | 2.00 | 1.16          | 37.2 | 29.4 - 44.9 | 60.5 | 49.4 - 75.6 | 81.9 | 75.5 - 116  | 94.5 | 82.7 - 308  | 31.7 | 25.9 - 39.0 |
| 40-59 | sU     | CZ      | CzechHBM-AE     | 2018 - 2019   | F,M | 192 |      | 2.17 | 0.00          | 11.9 | 10.5 - 13.9 | 20.7 | 16.8 - 24.7 | 31.5 | 26.6 - 49.9 | 55.7 | 36.9 - 117  | 13.1 | 11.7 - 14.5 |
| 60+   | sU     | AT      | PBAT            | 2010 - 2012   | F,M | 89  | 0.59 | 1.18 | 1.12          | 24.8 | 22.0 - 30.0 | 45.1 | 35.1 - 63.2 | 87.5 | 63.2 - 119  | 113  | 87.9 - 208  | 26.2 | 21.5 - 31.8 |

Notes. Matrix: mU - first morning urine, sU - spot urine, 24hU - 24-hours urine; country: AT - Austria, BE - Belgium, CZ - Czech Republic, DE - Germany, DK - Denmark, ES - Spain, HU - Hungary, IL - Israel, LU - Luxemburg, NO - Norway, PL - Poland, SE - Sweden, SI - Slovenia, SK - Slovakia; sex: F - female, M - male; n - sample size; LOD - limit of detection; LOQ - limit of quantification; % below limit - percentage of values below limit of detection/quantification, whichever was applied in the data collection; P50, P75, P90, P95 - 50th, 75th, 90th, 95th percentile; 95% CI - 95 % confidence interval; GM - geometric mean; NA - Not available.

Data only displayed if n was at least 50; percentiles missing when below LOD/LOQ; CIs of the observed percentiles missing when they fall outside the observed range; GM was imputed (fixed imputation) based on a log-normal distribution when at least 50 % of values were above LOD/LOQ.

**Table S9: DiBP metabolite OH-MiBP (2-OH-Mono-iso- butylphthalate) in microg/L**

| Age   | Matrix | Country | Data collection | Sampling year | Sex | N   | LOD  | LOQ  | % below limit | P50  | P50_95% CI  | P75  | P75_95% CI  | P90  | P90_95% CI  | P95  | P95_95% CI  | GM   | GM_95% CI   |
|-------|--------|---------|-----------------|---------------|-----|-----|------|------|---------------|------|-------------|------|-------------|------|-------------|------|-------------|------|-------------|
| 3-5   | mU     | DE      | GerES V         | 2015 - 2017   | F,M | 388 |      | 0.25 | 0.00          | 11.1 | 9.92 - 12.3 | 19.4 | 18.0 - 21.5 | 32.9 | 28.8 - 36.9 | 42.4 | 36.8 - 60.4 | 11.3 | 10.4 - 12.3 |
| 3-5   | sU     | SK      | Children cohort | 2015 - 2016   | F,M | 67  |      | 0.25 | 0.00          | 14.8 | 9.41 - 19.1 | 26.6 | 21.3 - 33.0 | 37.1 | 31.6 - 52.4 | 47.3 |             | 12.6 | 9.98 - 15.9 |
| 6-11  | mU     | DE      | DEMOCOPHES-DE   | 2011          | F,M | 119 |      | 0.25 | 0.00          | 16.1 | 13.5 - 19.7 | 25.8 | 22.2 - 34.1 | 45.2 | 37.4 - 75.9 | 75.9 | 57.6 - 86.3 | 16.2 | 14.0 - 18.8 |
| 6-11  | mU     | DE      | GerES V         | 2015 - 2017   | F,M | 937 |      | 0.25 | 0.11          | 9.50 | 9.00 - 10.0 | 15.3 | 14.5 - 16.4 | 26.9 | 23.7 - 30.1 | 36.8 | 32.6 - 46.7 | 9.68 | 9.19 - 10.2 |
| 6-11  | sU     | SK      | Children cohort | 2015 - 2016   | F,M | 112 |      | 0.25 | 0.00          | 16.8 | 13.5 - 20.2 | 35.8 | 24.4 - 40.7 | 56.1 | 45.4 - 81.7 | 80.3 | 63.4 - 136  | 16.8 | 14.0 - 20.2 |
| 12-19 | sU     | DK      | DYMS 2009       | 2009          | M   | 69  | 0.25 | 0.25 | 0.00          | 7.21 | 6.34 - 8.99 | 12.2 | 9.95 - 16.2 | 17.6 | 15.6 - 30.9 | 22.8 |             | 6.84 | 5.51 - 8.49 |
| 12-19 | sU     | DK      | DYMS 2013       | 2013          | M   | 70  | 0.25 | 0.25 | 2.86          | 4.97 | 3.88 - 6.46 | 8.21 | 6.66 - 11.5 | 13.5 | 10.1 - 18.6 | 16.9 |             | 4.41 | 3.51 - 5.55 |
| 12-19 | mU     | DE      | GerES V         | 2015 - 2017   | F,M | 932 |      | 0.25 | 0.00          | 7.25 | 6.90 - 7.80 | 12.9 | 12.0 - 13.8 | 23.6 | 21.0 - 25.6 | 33.1 | 29.0 - 39.8 | 7.69 | 7.27 - 8.12 |
| 12-19 | sU     | DK      | DYMS 2017       | 2017          | M   | 76  | 0.25 | 0.25 | 1.32          | 3.46 | 2.70 - 4.10 | 5.68 | 4.48 - 7.92 | 9.12 | 7.04 - 15.8 | 11.9 | 9.15 - 34.2 | 3.32 | 2.73 - 4.04 |
| 20-39 | 24hU   | DE      | ESB 2007        | 2007          | F,M | 60  |      | 0.25 | 0.00          | 8.15 | 5.72 - 9.10 | 11.2 | 9.34 - 14.0 | 17.4 | 12.8 - 27.5 | 24.0 |             | 7.66 | 6.51 - 9.00 |
| 20-39 | 24hU   | DE      | ESB 2009        | 2009          | F,M | 60  |      | 0.25 | 0.00          | 5.90 | 4.70 - 7.69 | 10.7 | 7.70 - 14.9 | 20.5 | 12.8 - 36.5 | 27.3 |             | 6.58 | 5.38 - 8.05 |
| 20-39 | mU     | DE      | DEMOCOPHES-DE   | 2011          | F   | 64  |      | 0.25 | 0.00          | 10.4 | 7.56 - 13.0 | 16.2 | 14.3 - 18.2 | 19.1 | 17.4 - 29.6 | 27.7 |             | 9.68 | 8.21 - 11.4 |
| 20-39 | 24hU   | DE      | ESB 2011        | 2011          | F,M | 60  |      | 0.25 | 0.00          | 5.75 | 4.50 - 7.50 | 9.07 | 7.66 - 12.3 | 13.2 | 11.2 - 26.2 | 22.0 |             | 6.01 | 5.04 - 7.16 |
| 20-39 | 24hU   | DE      | ESB 2013        | 2013          | F,M | 60  |      | 0.25 | 0.00          | 4.60 | 3.90 - 5.79 | 7.25 | 5.80 - 9.14 | 10.5 | 8.46 - 13.2 | 12.2 |             | 4.64 | 3.95 - 5.46 |
| 20-39 | 24hU   | DE      | ESB 2015        | 2015          | F,M | 60  |      | 0.25 | 0.00          | 2.80 | 2.50 - 3.00 | 3.80 | 3.08 - 5.07 | 5.96 | 4.92 - 18.4 | 11.9 |             | 2.90 | 2.29 - 3.67 |
| 40-59 | mU     | DE      | DEMOCOPHES-DE   | 2011          | F   | 54  |      | 0.25 | 0.00          | 6.30 | 5.34 - 8.16 | 11.9 | 8.16 - 25.6 | 26.3 | 19.8 - 58.3 | 30.9 |             | 7.70 | 6.09 - 9.74 |

Notes. Matrix: mU - first morning urine, sU - spot urine, 24hU - 24-hours urine; country: AT - Austria, BE - Belgium, CZ - Czech Republic, DE - Germany, DK - Denmark, ES - Spain, HU - Hungary, IL - Israel, LU - Luxembourg, NO - Norway, PL - Poland, SE - Sweden, SI - Slovenia, SK - Slovakia; sex: F - female, M - male; n - sample size; LOD - limit of detection; LOQ - limit of quantification; % below limit - percentage of values below limit of detection/quantification, whichever was applied in the data collection; P50, P75, P90, P95 - 50th, 75th, 90th, 95th percentile; 95% CI - 95 % confidence interval; GM - geometric mean; NA - Not available.

Data only displayed if n was at least 50; percentiles missing when below LOD/LOQ; CIs of the observed percentiles missing when they fall outside the observed range; GM was imputed (fixed imputation) based on a log-normal distribution when at least 50 % of values were above LOD/LOQ.



**Table S10: DEP metabolite MEP (Mono-ethyl phthalate) in microg/L**

| Age   | Matrix | Country | Data collection | Sampling year | Sex | N   | LOD  | LOQ  | % below limit | P50  | P50_95% CI  | P75  | P75_95% CI  | P90  | P90_95% CI  | P95  | P95_95% CI  | GM   | GM_95% CI   |
|-------|--------|---------|-----------------|---------------|-----|-----|------|------|---------------|------|-------------|------|-------------|------|-------------|------|-------------|------|-------------|
| 3-5   | sU     | DK      | CPH-MC          | 2006          | F,M | 189 | 0.24 |      | 0.00          | 24.7 | 20.8 - 28.8 | 50.1 | 39.6 - 61.6 | 98.5 | 75.7 - 120  | 128  | 107 - 235   | 24.9 | 21.4 - 28.9 |
| 3-5   | mU     | DE      | GerES V         | 2015 - 2017   | F,M | 388 |      | 0.50 | 0.00          | 18.6 | 16.6 - 20.8 | 35.7 | 32.2 - 40.8 | 64.7 | 57.4 - 84.4 | 97.2 | 82.5 - 175  | 19.3 | 17.4 - 21.3 |
| 3-5   | sU     | SK      | Children cohort | 2015 - 2016   | F,M | 67  |      | 0.50 | 0.00          | 20.5 | 12.2 - 25.3 | 34.8 | 28.6 - 50.0 | 84.8 | 45.0 - 113  | 91.9 |             | 17.8 | 13.8 - 23.0 |
| 6-11  | sU     | DK      | CPH-MC          | 2006 - 2007   | F,M | 659 | 0.24 |      | 0.00          | 19.6 | 17.9 - 21.5 | 38.3 | 34.4 - 44.0 | 74.1 | 66.0 - 91.4 | 134  | 102 - 154   | 19.8 | 18.3 - 21.6 |
| 6-11  | mU     | DK      | CPHPUB-Cross    | 2006 - 2008   | F,M | 913 | 0.53 |      | 0.00          | 35.9 | 33.0 - 38.6 | 67.6 | 60.7 - 72.3 | 114  | 105 - 135   | 197  | 167 - 222   | 39.3 | 37.1 - 41.7 |
| 6-11  | sU     | AT      | PBAT            | 2010 - 2012   | F,M | 165 | 2.50 | 5.00 | 12.7          | 16.9 | 13.5 - 20.1 | 30.6 | 25.6 - 39.2 | 53.7 | 46.2 - 98.3 | 102  | 59.5 - 177  | 16.9 | 14.4 - 19.7 |
| 6-11  | mU     | SE      | DEMOCOPHES-SE   | 2011 - 2012   | F,M | 98  |      | 0.30 | 0.00          | 24.4 | 20.8 - 32.5 | 45.6 | 36.0 - 57.2 | 100  | 57.6 - 207  | 149  | 114 - 687   | 28.7 | 23.6 - 34.8 |
| 6-11  | mU     | DK      | DEMOCOPHES-DK   | 2011          | F,M | 143 |      | 0.53 | 0.00          | 19.6 | 16.1 - 21.9 | 33.8 | 27.6 - 40.9 | 60.6 | 47.8 - 67.8 | 67.8 | 62.1 - 125  | 20.1 | 17.6 - 22.8 |
| 6-11  | mU     | ES      | DEMOCOPHES-ES   | 2011 - 2012   | F,M | 120 |      | 0.50 | 0.00          | 169  | 136 - 203   | 347  | 275 - 489   | 708  | 522 - 1062  | 1027 | 751 - 2628  | 180  | 149 - 219   |
| 6-11  | mU     | SL      | DEMOCOPHES-SI   | 2011 - 2012   | F,M | 119 |      | 0.50 | 0.00          | 38.0 | 33.0 - 45.8 | 91.0 | 67.0 - 122  | 159  | 125 - 240   | 239  | 165 - 342   | 42.5 | 35.1 - 51.5 |
| 6-11  | mU     | LU      | DEMOCOPHES-LU   | 2011 - 2012   | F,M | 60  |      | 0.50 | 0.00          | 20.5 | 17.0 - 31.9 | 43.2 | 32.8 - 54.1 | 74.0 | 51.6 - 174  | 120  |             | 23.6 | 18.7 - 29.9 |
| 6-11  | mU     | DE      | DEMOCOPHES-DE   | 2011          | F,M | 119 |      | 0.50 | 0.00          | 20.2 | 17.1 - 24.8 | 35.8 | 30.3 - 43.0 | 54.7 | 45.5 - 87.1 | 86.6 | 59.4 - 441  | 22.8 | 19.6 - 26.6 |
| 6-11  | mU     | BE      | DEMOCOPHES-BE   | 2011 - 2012   | F,M | 129 |      | 0.50 | 0.00          | 23.0 | 19.0 - 29.0 | 41.0 | 33.4 - 63.0 | 101  | 70.6 - 168  | 167  | 105 - 638   | 25.7 | 21.2 - 31.2 |
| 6-11  | mU     | HU      | DEMOCOPHES-HU   | 2011 - 2012   | F,M | 120 |      | 0.64 | 0.00          | 48.5 | 34.5 - 56.3 | 104  | 82.4 - 139  | 195  | 149 - 312   | 288  | 207 - 459   | 45.4 | 36.6 - 56.1 |
| 6-11  | mU     | PL      | DEMOCOPHES-PL   | 2011 - 2012   | F,M | 120 |      | 0.50 | 0.00          | 42.0 | 29.9 - 48.3 | 70.5 | 57.0 - 109  | 213  | 145 - 252   | 252  | 224 - 429   | 42.2 | 35.0 - 50.9 |
| 6-11  | mU     | CZ      | DEMOCOPHES-CZ   | 2011 - 2012   | F,M | 120 |      | 0.64 | 0.00          | 31.0 | 21.0 - 40.4 | 53.5 | 44.8 - 79.5 | 103  | 84.0 - 178  | 168  | 118 - 420   | 31.6 | 26.3 - 38.0 |
| 6-11  | mU     | SK      | DEMOCOPHES-SK   | 2011 - 2012   | F,M | 129 |      | 0.64 | 0.00          | 42.2 | 35.5 - 51.0 | 73.7 | 60.6 - 94.1 | 122  | 97.9 - 183  | 183  | 147 - 290   | 39.8 | 33.6 - 47.1 |
| 6-11  | mU     | SK      | PCBcohort_c     | 2014 - 2016   | F,M | 249 | 3.23 |      | 0.00          | 30.8 | 27.0 - 34.6 | 69.1 | 58.8 - 92.8 | 171  | 138 - 269   | 294  | 210 - 547   | 37.4 | 32.4 - 43.1 |
| 6-11  | mU     | DE      | GerES V         | 2015 - 2017   | F,M | 937 |      | 0.50 | 0.11          | 20.3 | 18.5 - 21.7 | 38.5 | 36.0 - 43.6 | 89.4 | 77.6 - 105  | 161  | 120 - 185   | 22.4 | 20.9 - 24.0 |
| 6-11  | sU     | SK      | Children cohort | 2015 - 2016   | F,M | 112 |      | 0.50 | 0.00          | 19.3 | 17.5 - 27.2 | 46.4 | 34.5 - 76.3 | 113  | 80.1 - 186  | 175  | 125 - 408   | 23.3 | 18.6 - 29.1 |
| 12-19 | mU     | DK      | CPHPUB-Cross    | 2006 - 2008   | F,M | 389 | 0.53 |      | 0.00          | 46.3 | 40.2 - 52.4 | 110  | 93.4 - 128  | 290  | 239 - 422   | 713  | 420 - 1151  | 58.3 | 51.4 - 66.1 |
| 12-19 | sU     | DK      | DYMS 2007       | 2007          | M   | 239 | 0.53 | 0.53 | 0.00          | 95.6 | 74.7 - 109  | 248  | 192 - 404   | 1119 | 729 - 1771  | 2480 | 1582 - 2801 | 114  | 93.7 - 139  |
| 12-19 | sU     | DK      | DYMS 2008       | 2008          | M   | 261 | 0.53 | 0.53 | 0.00          | 92.9 | 69.5 - 123  | 321  | 251 - 488   | 1214 | 778 - 1643  | 1872 | 1593 - 2836 | 114  | 93.3 - 138  |
| 12-19 | sU     | DK      | DYMS 2009       | 2009          | M   | 210 | 0.43 | 0.43 | 0.00          | 55.3 | 43.2 - 69.3 | 198  | 133 - 300   | 767  | 490 - 1022  | 1352 | 892 - 2965  | 75.7 | 61.4 - 93.2 |
| 12-19 | sU     | AT      | PBAT            | 2010 - 2012   | F,M | 94  | 2.50 | 5.00 | 5.32          | 24.3 | 19.5 - 31.6 | 57.9 | 38.6 - 75.0 | 90.7 | 75.5 - 258  | 209  | 97.2 - 460  | 27.3 | 22.0 - 33.9 |
| 12-19 | sU     | DK      | DYMS 2013       | 2013          | M   | 70  | 0.43 | 0.43 | 0.00          | 27.8 | 19.9 - 37.4 | 64.5 | 39.7 - 81.4 | 152  | 80.9 - 534  | 309  |             | 30.8 | 23.1 - 41.1 |
| 12-19 | sU     | BE      | FLEHS3RefAdo    | 2013          | F,M | 207 |      | 0.50 | 0.00          | 32.3 | 25.7 - 40.2 | 80.8 | 61.3 - 102  | 371  | 147 - 562   | 589  | 441 - 958   | 39.3 | 32.6 - 47.4 |
| 12-19 | mU     | DE      | GerES V         | 2015 - 2017   | F,M | 932 |      | 0.50 | 0.00          | 26.2 | 23.7 - 28.4 | 64.8 | 55.9 - 71.1 | 148  | 129 - 193   | 299  | 227 - 410   | 31.2 | 28.9 - 33.6 |
| 12-19 | mU     | SK      | PCBcohort_t     | 2015 - 2017   | F,M | 65  | 3.23 |      | 3.08          | 18.9 | 14.1 - 27.4 | 44.4 | 31.6 - 67.0 | 90.8 | 63.3 - 211  | 149  |             | 21.6 | 16.4 - 28.5 |
| 12-19 | sU     | DK      | DYMS 2017       | 2017          | M   | 76  | 0.43 | 0.43 | 0.00          | 21.1 | 16.4 - 29.7 | 48.0 | 30.0 - 62.7 | 122  | 62.3 - 336  | 212  | 123 - 727   | 25.1 | 19.6 - 32.2 |
| 20-39 | 24hU   | DE      | ESB 2007        | 2007          | F,M | 60  |      | 0.50 | 0.00          | 53.5 | 30.7 - 91.5 | 134  | 91.5 - 256  | 294  | 187 - 851   | 400  |             | 54.3 | 38.5 - 76.7 |
| 20-39 | sU     | DK      | DYMS 2008       | 2008          | M   | 54  | 0.53 | 0.53 | 0.00          | 71.1 | 46.6 - 121  | 205  | 121 - 394   | 470  | 245 - 1596  | 589  |             | 80.4 | 56.2 - 115  |
| 20-39 | sU     | DK      | DYMS 2009       | 2009          | M   | 79  | 0.43 | 0.43 | 0.00          | 68.6 | 55.1 - 116  | 250  | 137 - 511   | 1049 | 432 - 3676  | 2172 | 1074 - 7458 | 99.1 | 69.0 - 142  |
| 20-39 | 24hU   | DE      | ESB 2009        | 2009          | F,M | 60  |      | 0.50 | 0.00          | 37.5 | 26.7 - 52.5 | 75.3 | 54.2 - 125  | 150  | 107 - 542   | 318  |             | 38.6 | 28.6 - 52.1 |

| Age   | Matrix | Country | Data collection | Sampling year | Sex | N   | LOD  | LOQ  | % below limit | P50  | P50_95% CI  | P75  | P75_95% CI  | P90  | P90_95% CI  | P95  | P95_95% CI | GM   | GM_95% CI   |
|-------|--------|---------|-----------------|---------------|-----|-----|------|------|---------------|------|-------------|------|-------------|------|-------------|------|------------|------|-------------|
| 20-39 | sU     | AT      | PBAT            | 2010 - 2011   | F,M | 135 | 2.50 | 5.00 | 5.19          | 28.3 | 21.8 - 38.9 | 80.8 | 59.5 - 104  | 171  | 125 - 358   | 357  | 202 - 472  | 32.2 | 26.0 - 39.9 |
| 20-39 | mU     | SE      | DEMOCOPHES-SE   | 2011 - 2012   | F   | 50  |      | 0.30 | 0.00          | 40.9 | 24.7 - 60.0 | 91.8 | 56.6 - 170  | 188  | 127 - 303   | 203  |            | 41.3 | 30.7 - 55.6 |
| 20-39 | mU     | DK      | DEMOCOPHES-DK   | 2011          | F   | 51  |      | 0.53 | 0.00          | 34.7 | 16.8 - 63.6 | 93.8 | 61.4 - 192  | 207  | 128 - 539   | 424  |            | 38.0 | 26.5 - 54.4 |
| 20-39 | mU     | SL      | DEMOCOPHES-SI   | 2011 - 2012   | F   | 63  |      | 0.50 | 0.00          | 45.0 | 38.0 - 83.2 | 139  | 95.7 - 241  | 255  | 213 - 627   | 353  |            | 56.8 | 41.6 - 77.6 |
| 20-39 | mU     | DE      | DEMOCOPHES-DE   | 2011          | F   | 64  |      | 0.50 | 0.00          | 27.8 | 22.9 - 41.7 | 58.9 | 44.6 - 102  | 133  | 83.5 - 249  | 190  |            | 31.8 | 24.6 - 41.1 |
| 20-39 | mU     | BE      | DEMOCOPHES-BE   | 2011 - 2012   | F   | 62  |      | 0.50 | 0.00          | 33.5 | 19.9 - 51.1 | 73.2 | 52.4 - 98.9 | 166  | 91.1 - 200  | 197  |            | 30.4 | 22.7 - 40.8 |
| 20-39 | 24hU   | DE      | ESB 2011        | 2011          | F,M | 60  |      | 0.50 | 0.00          | 17.9 | 13.7 - 38.4 | 64.2 | 38.8 - 115  | 149  | 85.4 - 599  | 190  |            | 26.7 | 18.7 - 38.3 |
| 20-39 | mU     | HU      | DEMOCOPHES-HU   | 2011 - 2012   | F   | 89  |      | 0.64 | 0.00          | 51.3 | 39.1 - 71.6 | 133  | 91.6 - 206  | 326  | 200 - 603   | 537  | 349 - 3941 | 62.7 | 47.9 - 82.0 |
| 20-39 | mU     | PL      | DEMOCOPHES-PL   | 2011 - 2012   | F   | 88  |      | 0.50 | 0.00          | 31.5 | 18.0 - 42.0 | 76.0 | 47.4 - 186  | 227  | 184 - 508   | 392  | 228 - 1813 | 37.0 | 27.8 - 49.1 |
| 20-39 | mU     | CZ      | DEMOCOPHES-CZ   | 2011 - 2012   | F   | 88  |      | 0.64 | 0.00          | 38.0 | 29.8 - 64.7 | 108  | 80.4 - 154  | 196  | 153 - 539   | 432  | 221 - 2433 | 44.7 | 33.7 - 59.3 |
| 20-39 | mU     | SK      | DEMOCOPHES-SK   | 2011 - 2012   | F   | 91  |      | 0.64 | 0.00          | 51.0 | 40.8 - 83.5 | 131  | 99.4 - 190  | 219  | 189 - 733   | 438  | 221 - 1291 | 55.9 | 43.0 - 72.6 |
| 20-39 | 24hU   | DE      | ESB 2013        | 2013          | F,M | 60  |      | 0.50 | 0.00          | 20.9 | 13.6 - 25.2 | 52.3 | 26.8 - 69.3 | 75.2 | 60.2 - 114  | 93.3 |            | 20.3 | 15.4 - 26.7 |
| 20-39 | 24hU   | DE      | ESB 2015        | 2015          | F,M | 60  |      | 0.50 | 0.00          | 13.5 | 8.32 - 21.2 | 31.7 | 21.3 - 52.0 | 55.5 | 43.8 - 91.5 | 71.2 |            | 14.1 | 10.6 - 18.8 |
| 40-59 | sU     | AT      | PBAT            | 2010 - 2011   | F,M | 112 | 2.50 | 5.00 | 8.04          | 39.4 | 22.0 - 54.3 | 109  | 73.0 - 174  | 239  | 179 - 422   | 419  | 248 - 626  | 36.9 | 28.1 - 48.3 |
| 40-59 | mU     | DK      | DEMOCOPHES-DK   | 2011          | F   | 94  |      | 0.53 | 0.00          | 26.7 | 21.8 - 39.5 | 55.9 | 46.3 - 88.1 | 143  | 89.3 - 371  | 319  | 147 - 538  | 31.0 | 24.6 - 39.1 |
| 40-59 | mU     | ES      | DEMOCOPHES-ES   | 2011 - 2012   | F   | 75  |      | 0.50 | 0.00          | 141  | 102 - 207   | 267  | 218 - 437   | 638  | 423 - 1385  | 1233 | 639 - 1665 | 136  | 103 - 180   |
| 40-59 | mU     | SL      | DEMOCOPHES-SI   | 2011 - 2012   | F   | 57  |      | 0.50 | 0.00          | 46.0 | 33.7 - 67.8 | 82.0 | 69.1 - 176  | 186  | 131 - 360   | 245  |            | 47.8 | 36.5 - 62.5 |
| 40-59 | mU     | DE      | DEMOCOPHES-DE   | 2011          | F   | 56  |      | 0.50 | 0.00          | 42.0 | 26.0 - 65.9 | 96.3 | 66.3 - 166  | 181  | 137 - 726   | 445  |            | 46.8 | 34.3 - 63.9 |
| 40-59 | mU     | BE      | DEMOCOPHES-BE   | 2011 - 2012   | F   | 67  |      | 0.50 | 0.00          | 44.0 | 29.0 - 67.0 | 94.0 | 70.0 - 136  | 190  | 123 - 535   | 441  |            | 43.9 | 32.7 - 58.9 |
| 60+   | sU     | AT      | PBAT            | 2010 - 2012   | F,M | 89  | 2.50 | 5.00 | 6.74          | 38.6 | 29.2 - 52.1 | 92.4 | 71.5 - 170  | 343  | 169 - 1014  | 994  | 443 - 1879 | 45.4 | 33.0 - 62.6 |

Notes. Matrix: mU - first morning urine, sU - spot urine, 24hU - 24-hours urine; country: AT - Austria, BE - Belgium, CZ - Czech Republic, DE - Germany, DK - Denmark, ES - Spain, HU - Hungary, IL - Israel, LU - Luxemburg, NO - Norway, PL - Poland, SE - Sweden, SI - Slovenia, SK - Slovakia; sex: F - female, M - male; n - sample size; LOD - limit of detection; LOQ - limit of quantification; % below limit - percentage of values below limit of detection/quantification, whichever was applied in the data collection; P50, P75, P90, P95 - 50th, 75th, 90th, 95th percentile; 95% CI - 95 % confidence interval; GM - geometric mean; NA - Not available.

Data only displayed if n was at least 50; percentiles missing when below LOD/LOQ; CIs of the observed percentiles missing when they fall outside the observed range; GM was imputed (fixed imputation) based on a log-normal distribution when at least 50 % of values were above LOD/LOQ.

**Table S11: DMP metabolite MMP (Mono-methyl phthalate) in microg/L**

| Age   | Matrix | Country | Data collection | Sampling year | Sex | N   | LOD  | LOQ  | % below limit | P50  | P50_95% CI  | P75  | P75_95% CI  | P90  | P90_95% CI  | P95  | P95_95% CI  | GM   | GM_95% CI   |
|-------|--------|---------|-----------------|---------------|-----|-----|------|------|---------------|------|-------------|------|-------------|------|-------------|------|-------------|------|-------------|
| 3-5   | mU     | DE      | GerES V         | 2015 - 2017   | F,M | 388 |      | 1.00 | 2.32          | 6.70 | 5.60 - 7.30 | 12.2 | 10.6 - 14.7 | 30.8 | 23.2 - 43.7 | 66.0 | 39.7 - 115  | 7.04 | 6.28 - 7.89 |
| 3-5   | sU     | SK      | Children cohort | 2015 - 2016   | F,M | 67  |      | 1.00 | 0.00          | 1.88 |             | 3.71 |             | 6.62 |             | 8.92 |             |      |             |
| 6-11  | mU     | DE      | DEMOCOPHES-DE   | 2011          | F,M | 119 |      | 1.00 | 15.1          | 5.89 | 4.29 - 7.34 | 12.1 | 9.14 - 17.2 | 29.6 | 19.5 - 45.5 | 43.8 | 31.8 - 149  | 5.01 | 3.86 - 6.49 |
| 6-11  | mU     | HU      | DEMOCOPHES-HU   | 2011 - 2012   | F,M | 120 |      | 4.73 | 53.3          |      |             | 11.6 | 8.56 - 17.4 | 27.7 | 19.4 - 63.3 | 56.2 | 38.1 - 307  |      |             |
| 6-11  | mU     | CZ      | DEMOCOPHES-CZ   | 2011 - 2012   | F,M | 120 |      | 4.73 | 58.3          |      |             | 8.55 | 6.31 - 10.6 | 18.6 | 11.0 - 30.3 | 28.6 | 19.3 - 237  |      |             |
| 6-11  | mU     | SK      | DEMOCOPHES-SK   | 2011 - 2012   | F,M | 129 |      | 4.73 | 69.8          |      |             | 6.47 |             | 13.1 | 9.83 - 38.6 | 38.3 | 15.8 - 97.2 |      |             |
| 6-11  | mU     | SK      | PCBcohort_c     | 2014 - 2016   | F,M | 249 | 3.40 |      | 37.4          | 3.60 | 3.60 - 3.82 | 3.82 | 3.82 - 3.82 | 11.4 | 8.78 - 15.2 | 18.1 | 14.1 - 30.5 | 3.34 | 2.98 - 3.74 |
| 6-11  | mU     | DE      | GerES V         | 2015 - 2017   | F,M | 937 |      | 1.00 | 1.39          | 6.80 | 6.20 - 7.40 | 13.7 | 12.5 - 15.4 | 28.0 | 24.7 - 34.4 | 47.0 | 38.9 - 60.9 | 7.39 | 6.91 - 7.90 |
| 6-11  | sU     | SK      | Children cohort | 2015 - 2016   | F,M | 112 |      | 1.00 | 0.00          | 3.27 |             | 6.75 |             | 10.7 |             | 19.7 |             |      |             |
| 12-19 | sU     | DK      | DYMS 2009       | 2009          | M   | 69  | 0.27 | 0.27 | 7.25          | 2.52 | 2.05 - 3.03 | 3.61 | 3.21 - 5.06 | 6.46 | 4.99 - 17.6 | 9.24 |             | 2.33 | 1.80 - 3.03 |
| 12-19 | sU     | DK      | DYMS 2013       | 2013          | M   | 70  | 0.27 | 0.27 | 8.57          | 2.32 | 1.96 - 3.06 | 3.82 | 3.18 - 4.91 | 5.28 | 4.50 - 7.97 | 6.64 |             | 2.08 | 1.68 - 2.59 |
| 12-19 | mU     | DE      | GerES V         | 2015 - 2017   | F,M | 932 |      | 1.00 | 2.68          | 5.80 | 5.40 - 6.18 | 11.0 | 10.1 - 12.2 | 19.8 | 18.6 - 21.9 | 30.7 | 25.3 - 37.2 | 6.13 | 5.77 - 6.52 |
| 12-19 | mU     | SK      | PCBcohort_t     | 2015 - 2017   | F,M | 65  | 3.40 |      | 70.8          |      |             | 3.81 |             | 9.78 | 5.10 - 21.0 | 13.4 |             |      |             |
| 12-19 | sU     | DK      | DYMS 2017       | 2017          | M   | 76  | 0.27 | 0.27 | 17.1          | 1.84 | 1.68 - 2.30 | 2.74 | 2.39 - 3.74 | 4.24 | 3.52 - 5.94 | 5.34 | 4.26 - 8.69 | 1.49 | 1.19 - 1.87 |
| 20-39 | 24hU   | DE      | ESB 2007        | 2007          | F,M | 59  |      | 1.00 | 5.08          | 8.00 | 4.70 - 10.3 | 22.8 | 10.8 - 43.0 | 62.5 | 35.7 - 122  | 102  |             | 7.98 | 5.52 - 11.6 |
| 20-39 | 24hU   | DE      | ESB 2009        | 2009          | F,M | 59  |      | 1.00 | 11.9          | 7.10 | 4.10 - 12.2 | 15.2 | 12.4 - 26.1 | 29.6 | 16.4 - 114  | 54.6 |             | 6.12 | 4.27 - 8.78 |
| 20-39 | mU     | DE      | DEMOCOPHES-DE   | 2011          | F   | 64  |      | 1.00 | 34.4          | 1.76 | 1.26 - 3.24 | 8.24 | 3.52 - 10.7 | 11.3 | 9.24 - 15.4 | 12.6 |             | 2.15 | 1.56 - 2.96 |
| 20-39 | 24hU   | DE      | ESB 2011        | 2011          | F,M | 60  |      | 1.00 | 1.67          | 4.35 | 3.70 - 6.99 | 8.22 | 7.08 - 11.6 | 13.3 | 9.83 - 40.1 | 35.1 |             | 5.16 | 4.14 - 6.44 |
| 20-39 | mU     | HU      | DEMOCOPHES-HU   | 2011 - 2012   | F   | 89  |      | 4.73 | 69.7          |      |             | 8.26 |             | 45.7 | 15.2 - 144  | 124  | 46.4 - 619  |      |             |
| 20-39 | mU     | CZ      | DEMOCOPHES-CZ   | 2011 - 2012   | F   | 88  |      | 4.73 | 80.7          |      |             |      |             | 6.70 | 5.41 - 15.4 | 13.5 | 7.25 - 273  |      |             |
| 20-39 | mU     | SK      | DEMOCOPHES-SK   | 2011 - 2012   | F   | 91  |      | 4.73 | 89.0          |      |             |      |             |      |             | 9.10 | 5.93 - 44.2 |      |             |
| 20-39 | 24hU   | DE      | ESB 2013        | 2013          | F,M | 60  |      | 1.00 | 1.67          | 3.50 | 2.70 - 4.49 | 6.12 | 4.50 - 10.9 | 16.8 | 9.10 - 31.1 | 29.2 |             | 4.19 | 3.32 - 5.30 |
| 20-39 | 24hU   | DE      | ESB 2015        | 2015          | F,M | 60  |      | 1.00 | 5.00          | 2.75 | 2.20 - 3.99 | 5.12 | 4.00 - 7.04 | 9.11 | 6.65 - 17.9 | 14.3 |             | 3.16 | 2.58 - 3.86 |
| 40-59 | mU     | DE      | DEMOCOPHES-DE   | 2011          | F   | 56  |      | 1.00 | 32.1          | 2.49 | 1.11 - 5.64 | 8.57 | 5.66 - 22.1 | 36.2 | 13.0 - 71.3 | 59.2 |             | 2.44 | 1.50 - 3.98 |

Notes. Matrix: mU - first morning urine, sU - spot urine, 24hU - 24-hours urine; country: AT - Austria, BE - Belgium, CZ - Czech Republic, DE - Germany, DK - Denmark, ES - Spain, HU - Hungary, IL - Israel, LU - Luxembourg, NO - Norway, PL - Poland, SE - Sweden, SI - Slovenia, SK - Slovakia; sex: F - female, M - male; n - sample size; LOD - limit of detection; LOQ - limit of quantification; % below limit - percentage of values below limit of detection/quantification, whichever was applied in the data collection; P50, P75, P90, P95 - 50th, 75th, 90th, 95th percentile; 95% CI - 95 % confidence interval; GM - geometric mean; NA - Not available.

Data only displayed if n was at least 50; percentiles missing when below LOD/LOQ; CIs of the observed percentiles missing when they fall outside the observed range; GM was imputed (fixed imputation) based on a log-normal distribution when at least 50 % of values were above LOD/LOQ.



**Table S12: Metabolite 3cx-MPP (3-carboxyl-mono-propyl phthalate) in microg/L**

| Age   | Matrix | Country | Data collection | Sampling year | Sex | N   | LOD  | LOQ  | % below limit | P50  | P50_95% CI  | P75  | P75_95% CI  | P90  | P90_95% CI  | P95  | P95_95% CI  | GM   | GM_95% CI   |
|-------|--------|---------|-----------------|---------------|-----|-----|------|------|---------------|------|-------------|------|-------------|------|-------------|------|-------------|------|-------------|
| 3-5   | mU     | DE      | GerES V         | 2015 - 2017   | F,M | 388 |      | 0.50 | 2.06          | 2.10 | 2.00 - 2.30 | 3.50 | 3.30 - 3.90 | 5.20 | 4.60 - 6.40 | 7.10 | 6.40 - 9.45 | 2.14 | 1.98 - 2.31 |
| 6-11  | mU     | DK      | CPHPUB-Cross    | 2006 - 2008   | F,M | 779 | 0.36 |      | 0.00          | 9.97 | 9.29 - 10.5 | 15.6 | 14.4 - 16.5 | 23.0 | 21.5 - 26.0 | 31.3 | 27.8 - 38.1 | 9.89 | 9.40 - 10.4 |
| 6-11  | mU     | DK      | DEMOCOPHES-DK   | 2011          | F,M | 143 |      | 0.36 | 0.00          | 7.44 | 6.51 - 8.63 | 12.8 | 10.8 - 15.5 | 29.2 | 18.5 - 62.1 | 64.7 | 36.0 - 120  | 8.67 | 7.46 - 10.1 |
| 6-11  | mU     | DE      | DEMOCOPHES-DE   | 2011          | F,M | 119 |      | 0.50 | 4.20          | 1.50 | 1.38 - 1.67 | 2.38 | 2.15 - 3.00 | 3.81 | 3.32 - 6.25 | 6.21 | 4.07 - 11.9 | 1.64 | 1.43 - 1.88 |
| 6-11  | mU     | DE      | GerES V         | 2015 - 2017   | F,M | 937 |      | 0.50 | 4.80          | 1.70 | 1.60 - 1.80 | 2.60 | 2.50 - 2.80 | 4.30 | 3.94 - 4.90 | 6.42 | 5.90 - 7.40 | 1.71 | 1.63 - 1.79 |
| 12-19 | mU     | DK      | CPHPUB-Cross    | 2006 - 2008   | F,M | 389 | 0.36 |      | 0.26          | 6.90 | 6.41 - 7.58 | 11.1 | 9.89 - 12.3 | 16.8 | 15.0 - 19.2 | 22.0 | 18.8 - 32.3 | 6.86 | 6.31 - 7.46 |
| 12-19 | mU     | DE      | GerES V         | 2015 - 2017   | F,M | 932 |      | 0.50 | 13.4          | 1.10 | 1.00 - 1.10 | 1.80 | 1.70 - 2.00 | 3.00 | 2.80 - 3.40 | 4.20 | 3.70 - 4.90 | 1.14 | 1.09 - 1.20 |
| 20-39 | mU     | DK      | DEMOCOPHES-DK   | 2011          | F   | 51  |      | 0.36 | 1.96          | 5.82 | 4.34 - 6.63 | 7.71 | 6.60 - 9.01 | 12.2 | 8.03 - 25.9 | 15.6 |             | 4.68 | 3.65 - 6.01 |
| 20-39 | mU     | DE      | DEMOCOPHES-DE   | 2011          | F   | 64  |      | 0.50 | 17.2          | 0.83 | 0.73 - 1.09 | 1.39 | 1.15 - 1.95 | 2.66 | 1.86 - 4.02 | 3.35 |             | 0.94 | 0.78 - 1.12 |
| 40-59 | mU     | DK      | DEMOCOPHES-DK   | 2011          | F   | 94  |      | 0.36 | 0.00          | 3.12 | 2.61 - 4.27 | 5.76 | 4.68 - 6.96 | 8.52 | 7.03 - 11.4 | 10.6 | 8.54 - 24.7 | 3.26 | 2.78 - 3.82 |
| 40-59 | mU     | DE      | DEMOCOPHES-DE   | 2011          | F   | 56  |      | 0.50 | 32.1          | 0.64 | 0.51 - 0.76 | 1.23 | 0.77 - 1.64 | 1.95 | 1.42 - 4.00 | 2.83 |             | 0.67 | 0.54 - 0.83 |

Notes. Matrix: mU - first morning urine, sU - spot urine, 24hU - 24-hours urine; country: AT - Austria, BE - Belgium, CZ - Czech Republic, DE - Germany, DK - Denmark, ES - Spain, HU - Hungary, IL - Israel, LU - Luxemburg, NO - Norway, PL - Poland, SE - Sweden, SI - Slovenia, SK - Slovakia; sex: F - female, M - male; n - sample size; LOD - limit of detection; LOQ - limit of quantification; % below limit - percentage of values below limit of detection/quantification, whichever was applied in the data collection; P50, P75, P90, P95 - 50th, 75th, 90th, 95th percentile; 95% CI - 95 % confidence interval; GM - geometric mean; NA - Not available.

Data only displayed if n was at least 50; percentiles missing when below LOD/LOQ; CIs of the observed percentiles missing when they fall outside the observed range; GM was imputed (fixed imputation) based on a log-normal distribution when at least 50 % of values were above LOD/LOQ.



**Table S13: DiNP metabolite cx-MiNP (7-Carboxy-(mono-methyl- heptyl) phthalate) in microg/L**

| Age   | Matrix | Country | Data collection | Sampling year | Sex | N   | LOD  | LOQ  | % below limit | P50  | P50_95% CI  | P75  | P75_95% CI  | P90  | P90_95% CI  | P95  | P95_95% CI  | GM   | GM_95% CI   |
|-------|--------|---------|-----------------|---------------|-----|-----|------|------|---------------|------|-------------|------|-------------|------|-------------|------|-------------|------|-------------|
| 3-5   | mU     | DE      | GerES IV 2005   | 2005          | F,M | 50  |      | 0.25 | 0.00          | 21.5 | 18.1 - 32.8 | 39.5 | 32.1 - 49.3 | 53.1 | 45.6 - 139  | 57.5 |             | 21.4 | 16.9 - 27.2 |
| 3-5   | sU     | DK      | CPH-MC          | 2006          | F,M | 189 | 0.08 |      | 0.00          | 6.75 | 5.97 - 8.66 | 12.8 | 11.9 - 14.6 | 21.6 | 16.9 - 28.9 | 30.3 | 22.8 - 60.5 | 7.22 | 6.33 - 8.24 |
| 3-5   | mU     | DE      | GerES V         | 2015 - 2017   | F,M | 388 |      | 0.20 | 0.00          | 6.70 | 6.12 - 7.38 | 12.4 | 10.9 - 13.6 | 19.4 | 17.9 - 23.3 | 29.3 | 22.7 - 43.6 | 7.01 | 6.44 - 7.62 |
| 3-5   | sU     | SK      | Children cohort | 2015 - 2016   | F,M | 67  |      | 0.20 | 0.00          | 6.35 | 4.57 - 8.67 | 12.2 | 10.6 - 15.2 | 21.5 | 14.3 - 64.1 | 45.0 |             | 6.05 | 4.55 - 8.04 |
| 6-11  | mU     | DE      | GerES IV 2005   | 2005          | F,M | 102 |      | 0.25 | 0.00          | 18.3 | 14.6 - 22.1 | 31.3 | 28.0 - 37.3 | 46.4 | 39.1 - 81.4 | 78.7 | 51.2 - 165  | 18.0 | 15.3 - 21.3 |
| 6-11  | sU     | DK      | CPH-MC          | 2006 - 2007   | F,M | 659 | 0.08 |      | 0.00          | 6.94 | 6.51 - 7.56 | 11.7 | 10.9 - 12.5 | 19.1 | 16.8 - 22.1 | 27.0 | 24.1 - 36.0 | 6.74 | 6.24 - 7.29 |
| 6-11  | mU     | DK      | CPHPUB-Cross    | 2006 - 2008   | F,M | 913 | 0.11 |      | 0.00          | 8.91 | 8.30 - 9.42 | 14.0 | 13.4 - 15.2 | 24.2 | 21.9 - 26.2 | 34.4 | 30.6 - 41.6 | 9.08 | 8.62 - 9.56 |
| 6-11  | mU     | SE      | DEMOCOPHES-SE   | 2011 - 2012   | F,M | 98  |      | 0.30 | 0.00          | 19.9 | 16.1 - 23.4 | 35.0 | 26.7 - 54.6 | 70.7 | 55.8 - 219  | 183  | 82.8 - 819  | 22.0 | 17.8 - 27.1 |
| 6-11  | mU     | DK      | DEMOCOPHES-DK   | 2011          | F,M | 143 |      | 0.11 | 0.00          | 7.84 | 6.80 - 8.98 | 12.7 | 10.5 - 16.2 | 22.8 | 20.2 - 44.8 | 45.4 | 28.0 - 107  | 8.59 | 7.36 - 10.0 |
| 6-11  | mU     | ES      | DEMOCOPHES-ES   | 2011 - 2012   | F,M | 120 |      | 0.20 | 0.00          | 13.2 | 11.2 - 15.6 | 21.7 | 17.9 - 27.0 | 41.4 | 30.0 - 53.0 | 46.8 | 43.7 - 91.9 | 13.7 | 12.0 - 15.8 |
| 6-11  | mU     | LU      | DEMOCOPHES-LU   | 2011 - 2012   | F,M | 59  |      | 0.20 | 0.00          | 8.52 | 7.37 - 10.2 | 14.1 | 10.5 - 20.5 | 22.1 | 18.0 - 48.9 | 29.0 |             | 8.74 | 6.99 - 10.9 |
| 6-11  | mU     | DE      | DEMOCOPHES-DE   | 2011          | F,M | 119 |      | 0.20 | 0.00          | 7.90 | 6.55 - 8.84 | 14.2 | 11.0 - 19.5 | 23.2 | 21.4 - 39.9 | 38.1 | 24.2 - 425  | 8.83 | 7.31 - 10.7 |
| 6-11  | mU     | BE      | DEMOCOPHES-BE   | 2011 - 2012   | F,M | 117 |      | 0.10 | 0.85          | 1.21 | 1.07 - 1.43 | 2.22 | 1.69 - 2.61 | 4.47 | 2.73 - 8.17 | 8.00 | 5.11 - 30.5 | 1.34 | 1.12 - 1.60 |
| 6-11  | mU     | PL      | DEMOCOPHES-PL   | 2011 - 2012   | F,M | 94  | 0.05 | 0.15 | 0.00          | 3.48 | 3.11 - 4.44 | 5.35 | 4.81 - 7.78 | 11.1 | 7.86 - 23.8 | 20.4 | 11.9 - 143  | 3.90 | 3.23 - 4.71 |
| 6-11  | mU     | CZ      | DEMOCOPHES-CZ   | 2011 - 2012   | F,M | 118 | 0.20 | 0.40 | 0.00          | 7.57 | 6.53 - 9.04 | 13.8 | 10.3 - 17.8 | 27.3 | 18.2 - 45.9 | 45.8 | 31.0 - 75.9 | 8.17 | 6.99 - 9.56 |
| 6-11  | mU     | NO      | IES             | 2012          | F,M | 50  | 0.40 | 1.00 | 0.00          | 4.34 | 3.48 - 5.32 | 6.62 | 5.20 - 8.68 | 10.6 | 7.06 - 22.0 | 14.1 |             | 4.80 | 4.06 - 5.68 |
| 6-11  | mU     | DE      | GerES V         | 2015 - 2017   | F,M | 935 |      | 0.20 | 0.11          | 5.70 | 5.40 - 6.10 | 9.75 | 9.00 - 10.7 | 17.4 | 16.3 - 20.8 | 28.3 | 23.6 - 33.0 | 6.18 | 5.85 - 6.54 |
| 6-11  | sU     | SK      | Children cohort | 2015 - 2016   | F,M | 112 |      | 0.20 | 0.00          | 8.34 | 7.05 - 9.75 | 12.5 | 11.6 - 17.3 | 22.3 | 18.4 - 35.4 | 31.6 | 22.5 - 76.9 | 7.80 | 6.54 - 9.31 |
| 12-19 | mU     | DE      | GerES IV 2005   | 2005          | F,M | 51  |      | 0.25 | 0.00          | 10.7 | 8.91 - 16.3 | 21.9 | 16.1 - 27.7 | 30.3 | 24.7 - 63.9 | 42.5 |             | 12.4 | 10.0 - 15.3 |
| 12-19 | mU     | DK      | CPHPUB-Cross    | 2006 - 2008   | F,M | 389 | 0.11 |      | 0.00          | 6.01 | 5.60 - 7.04 | 10.9 | 9.59 - 12.3 | 19.2 | 16.5 - 22.1 | 26.6 | 21.9 - 38.3 | 6.34 | 5.81 - 6.92 |
| 12-19 | sU     | DK      | DYMS 2007       | 2007          | M   | 239 | 0.11 | 0.11 | 0.84          | 6.69 | 5.78 - 7.63 | 11.5 | 10.3 - 13.0 | 19.5 | 17.6 - 26.3 | 28.8 | 22.6 - 65.0 | 6.77 | 5.97 - 7.68 |
| 12-19 | sU     | DK      | DYMS 2008       | 2008          | M   | 261 | 0.11 | 0.11 | 1.53          | 8.08 | 7.35 - 9.35 | 14.0 | 11.9 - 15.5 | 24.7 | 19.6 - 29.9 | 35.4 | 28.4 - 61.9 | 7.84 | 6.93 - 8.87 |
| 12-19 | sU     | DK      | DYMS 2009       | 2009          | M   | 210 | 0.04 | 0.04 | 1.43          | 7.61 | 6.76 - 8.69 | 12.6 | 11.5 - 14.6 | 21.9 | 17.9 - 29.2 | 33.0 | 24.0 - 44.0 | 6.64 | 5.70 - 7.73 |
| 12-19 | sU     | DK      | DYMS 2013       | 2013          | M   | 70  | 0.04 | 0.04 | 0.00          | 5.63 | 4.69 - 7.01 | 11.8 | 7.47 - 17.0 | 24.6 | 16.8 - 71.0 | 55.6 |             | 6.10 | 4.63 - 8.04 |
| 12-19 | mU     | DE      | GerES V         | 2015 - 2017   | F,M | 931 |      | 0.20 | 0.11          | 4.60 | 4.31 - 4.90 | 7.50 | 7.10 - 8.00 | 12.9 | 11.3 - 14.7 | 20.1 | 18.0 - 24.8 | 4.73 | 4.46 - 5.01 |
| 12-19 | sU     | DK      | DYMS 2017       | 2017          | M   | 76  | 0.04 | 0.04 | 0.00          | 3.75 | 3.35 - 4.38 | 6.41 | 4.63 - 7.87 | 12.2 | 7.63 - 59.9 | 49.7 | 12.4 - 335  | 4.48 | 3.49 - 5.76 |
| 20-39 | 24hU   | DE      | ESB 2007        | 2007          | F,M | 60  |      | 0.20 | 0.00          | 2.00 | 1.50 - 2.88 | 3.95 | 2.90 - 5.30 | 6.41 | 4.92 - 9.60 | 8.01 |             | 2.23 | 1.83 - 2.72 |
| 20-39 | sU     | DK      | DYMS 2008       | 2008          | M   | 54  | 0.11 | 0.11 | 0.00          | 9.48 | 8.22 - 10.9 | 13.7 | 10.9 - 18.5 | 21.9 | 16.0 - 53.6 | 31.5 |             | 9.54 | 7.67 - 11.9 |
| 20-39 | 24hU   | DE      | ESB 2008        | 2008          | F,M | 54  |      | 0.50 | 7.41          | 3.49 | 3.28 - 4.55 | 6.66 | 4.55 - 10.7 | 13.3 | 8.57 - 30.8 | 25.1 |             | 3.93 | 2.99 - 5.17 |
| 20-39 | sU     | DK      | DYMS 2009       | 2009          | M   | 79  | 0.04 | 0.04 | 1.27          | 8.04 | 7.03 - 10.9 | 14.5 | 12.1 - 21.0 | 41.2 | 21.0 - 77.6 | 54.3 | 41.2 - 216  | 8.95 | 7.02 - 11.4 |
| 20-39 | 24hU   | DE      | ESB 2009        | 2009          | F,M | 60  |      | 0.20 | 0.00          | 2.80 | 2.00 - 3.90 | 5.05 | 3.98 - 8.29 | 9.70 | 7.13 - 12.7 | 11.9 |             | 2.92 | 2.28 - 3.74 |
| 20-39 | mU     | SE      | DEMOCOPHES-SE   | 2011 - 2012   | F   | 50  |      | 0.30 | 0.00          | 17.2 | 12.9 - 32.7 | 73.3 | 30.9 - 164  | 187  | 122 - 790   | 326  |             | 26.6 | 17.8 - 39.9 |
| 20-39 | mU     | DK      | DEMOCOPHES-DK   | 2011          | F   | 51  |      | 0.11 | 0.00          | 7.33 | 5.26 - 11.7 | 14.0 | 11.6 - 21.1 | 22.0 | 16.3 - 72.7 | 48.1 |             | 7.25 | 5.40 - 9.75 |
| 20-39 | mU     | DE      | DEMOCOPHES-DE   | 2011          | F   | 64  |      | 0.20 | 0.00          | 6.05 | 4.84 - 7.46 | 9.34 | 7.61 - 14.2 | 20.9 | 12.6 - 39.2 | 32.7 |             | 6.59 | 5.16 - 8.42 |

| Age   | Matrix | Country | Data collection | Sampling year | Sex | N   | LOD  | LOQ  | % below limit | P50  | P50_95% CI  | P75  | P75_95% CI  | P90  | P90_95% CI  | P95  | P95_95% CI  | GM   | GM_95% CI   |
|-------|--------|---------|-----------------|---------------|-----|-----|------|------|---------------|------|-------------|------|-------------|------|-------------|------|-------------|------|-------------|
| 20-39 | 24hU   | DE      | ESB 2011        | 2011          | F,M | 60  |      | 0.20 | 0.00          | 3.70 | 3.00 - 4.30 | 5.20 | 4.30 - 9.36 | 11.3 | 6.77 - 80.1 | 20.4 |             | 3.95 | 3.04 - 5.13 |
| 20-39 | sU     | IL      | IBS             | 2011          | F,M | 144 | 0.25 | 0.50 | 0.69          | 9.64 | 8.50 - 13.1 | 18.6 | 16.9 - 22.5 | 29.7 | 24.5 - 58.4 | 58.6 | 31.3 - 69.5 | 10.1 | 8.65 - 11.9 |
| 20-39 | 24hU   | DE      | ESB 2013        | 2013          | F,M | 60  |      | 0.20 | 0.00          | 2.30 | 1.80 - 2.70 | 3.73 | 2.78 - 5.17 | 5.64 | 4.76 - 12.0 | 9.62 |             | 2.41 | 1.97 - 2.95 |
| 20-39 | 24hU   | DE      | ESB 2015        | 2015          | F,M | 60  |      | 0.20 | 0.00          | 2.00 | 1.80 - 2.50 | 3.90 | 2.58 - 7.59 | 8.02 | 6.57 - 14.1 | 12.5 |             | 2.50 | 2.00 - 3.13 |
| 40-59 | mU     | DK      | DEMOCOPHES-DK   | 2011          | F   | 94  |      | 0.11 | 0.00          | 5.13 | 3.67 - 6.60 | 8.54 | 7.15 - 11.4 | 17.6 | 11.5 - 35.5 | 30.2 | 18.2 - 49.1 | 5.12 | 4.23 - 6.18 |
| 40-59 | mU     | ES      | DEMOCOPHES-ES   | 2011 - 2012   | F   | 75  |      | 0.20 | 0.00          | 10.0 | 8.13 - 11.0 | 15.6 | 11.5 - 20.7 | 28.2 | 19.3 - 43.5 | 42.4 | 28.2 - 46.5 | 9.55 | 8.01 - 11.4 |
| 40-59 | mU     | DE      | DEMOCOPHES-DE   | 2011          | F   | 56  |      | 0.20 | 0.00          | 4.00 | 3.20 - 5.18 | 7.41 | 5.20 - 15.3 | 18.4 | 9.50 - 35.6 | 27.0 |             | 4.53 | 3.55 - 5.78 |
| 40-59 | sU     | IL      | IBS             | 2011          | F,M | 86  | 0.25 | 0.50 | 1.16          | 9.51 | 7.47 - 10.9 | 15.7 | 12.4 - 20.3 | 29.6 | 20.0 - 55.2 | 44.6 | 30.1 - 69.8 | 9.03 | 7.36 - 11.1 |

Notes. Matrix: mU - first morning urine, sU - spot urine, 24hU - 24-hours urine; country: AT - Austria, BE - Belgium, CZ - Czech Republic, DE - Germany, DK - Denmark, ES - Spain, HU - Hungary, IL - Israel, LU - Luxembourg, NO - Norway, PL - Poland, SE - Sweden, SI - Slovenia, SK - Slovakia; sex: F - female, M - male; n - sample size; LOD - limit of detection; LOQ - limit of quantification; % below limit - percentage of values below limit of detection/quantification, whichever was applied in the data collection; P50, P75, P90, P95 - 50th, 75th, 90th, 95th percentile; 95% CI - 95 % confidence interval; GM - geometric mean; NA - Not available.

Data only displayed if n was at least 50; percentiles missing when below LOD/LOQ; CIs of the observed percentiles missing when they fall outside the observed range; GM was imputed (fixed imputation) based on a log-normal distribution when at least 50 % of values were above LOD/LOQ.

**Table S14: DiNP metabolite OH-MiNP (7-OH-(Mono-methyl-octyl) phthalate) in microg/L**

| Age   | Matrix | Country | Data collection | Sampling year | Sex | N   | LOD  | LOQ  | % below limit | P50  | P50_95% CI  | P75  | P75_95% CI  | P90  | P90_95% CI  | P95  | P95_95% CI  | GM   | GM_95% CI   |
|-------|--------|---------|-----------------|---------------|-----|-----|------|------|---------------|------|-------------|------|-------------|------|-------------|------|-------------|------|-------------|
| 3-5   | mU     | DE      | GerES IV 2005   | 2005          | F,M | 50  |      | 0.25 | 0.00          | 15.9 | 11.4 - 23.6 | 28.1 | 23.5 - 42.3 | 44.9 | 34.5 - 83.4 | 51.3 |             | 15.2 | 11.6 - 19.8 |
| 3-5   | mU     | DE      | GerES V         | 2015 - 2017   | F,M | 384 |      | 0.20 | 0.00          | 8.55 | 7.63 - 9.20 | 15.5 | 13.4 - 17.3 | 24.5 | 21.9 - 27.2 | 33.1 | 27.2 - 40.0 | 8.44 | 7.75 - 9.20 |
| 3-5   | sU     | SK      | Children cohort | 2015 - 2016   | F,M | 67  |      | 0.20 | 0.00          | 7.76 | 4.65 - 11.6 | 13.7 | 12.3 - 15.1 | 17.1 | 14.7 - 35.9 | 24.8 |             | 6.29 | 4.93 - 8.03 |
| 6-11  | mU     | DE      | GerES IV 2005   | 2005          | F,M | 102 |      | 0.25 | 0.00          | 14.4 | 12.2 - 16.9 | 26.1 | 19.3 - 30.3 | 44.2 | 31.5 - 62.0 | 61.1 | 46.4 - 128  | 14.1 | 11.8 - 16.7 |
| 6-11  | sU     | DK      | CPH-MC          | 2006 - 2007   | F,M | 201 | 0.31 |      | 2.49          | 6.22 | 5.00 - 6.97 | 9.89 | 8.15 - 11.0 | 16.0 | 12.4 - 19.1 | 21.1 | 17.2 - 39.4 | 5.02 | 4.31 - 5.86 |
| 6-11  | mU     | DK      | CPHPUB-Cross    | 2006 - 2008   | F,M | 913 | 0.26 |      | 0.11          | 6.58 | 6.17 - 6.99 | 11.0 | 10.2 - 11.7 | 18.4 | 16.6 - 20.2 | 26.2 | 22.8 - 32.9 | 6.46 | 6.11 - 6.83 |
| 6-11  | mU     | SE      | DEMOCOPHES-SE   | 2011 - 2012   | F,M | 98  |      | 0.30 | 0.00          | 8.98 | 7.94 - 11.4 | 14.8 | 12.7 - 20.0 | 32.4 | 20.1 - 59.9 | 52.1 | 35.4 - 493  | 9.87 | 8.01 - 12.2 |
| 6-11  | mU     | DK      | DEMOCOPHES-DK   | 2011          | F,M | 143 |      | 0.26 | 0.00          | 4.99 | 4.19 - 5.60 | 9.55 | 7.48 - 12.6 | 19.3 | 15.7 - 36.3 | 37.0 | 21.7 - 94.3 | 5.49 | 4.61 - 6.55 |
| 6-11  | mU     | LU      | DEMOCOPHES-LU   | 2011 - 2012   | F,M | 59  |      | 0.20 | 0.00          | 7.48 | 5.57 - 9.01 | 12.4 | 9.07 - 17.9 | 22.6 | 16.3 - 54.0 | 26.4 |             | 7.18 | 5.56 - 9.27 |
| 6-11  | mU     | DE      | DEMOCOPHES-DE   | 2011          | F,M | 116 |      | 0.20 | 0.00          | 12.5 | 10.8 - 14.6 | 20.9 | 16.1 - 29.5 | 35.2 | 30.4 - 52.8 | 52.4 | 40.6 - 594  | 13.9 | 11.6 - 16.5 |
| 6-11  | mU     | BE      | DEMOCOPHES-BE   | 2011 - 2012   | F,M | 117 |      | 0.10 | 0.00          | 6.69 | 5.82 - 8.31 | 12.2 | 10.4 - 17.5 | 25.7 | 18.3 - 29.6 | 29.3 | 27.0 - 53.9 | 7.35 | 6.27 - 8.62 |
| 6-11  | mU     | PL      | DEMOCOPHES-PL   | 2011 - 2012   | F,M | 94  | 0.05 | 0.15 | 61.7          |      |             | 0.50 | 0.34 - 0.93 | 1.47 | 0.94 - 3.85 | 2.14 | 1.49 - 18.5 |      |             |
| 6-11  | mU     | CZ      | DEMOCOPHES-CZ   | 2011 - 2012   | F,M | 118 | 0.30 | 0.70 | 0.00          | 12.3 | 9.70 - 14.8 | 22.8 | 18.8 - 27.5 | 42.6 | 28.8 - 57.6 | 53.5 | 45.5 - 98.0 | 13.3 | 11.5 - 15.4 |
| 6-11  | mU     | NO      | IES             | 2012          | F,M | 50  | 0.10 | 0.25 | 0.00          | 4.25 | 3.86 - 6.82 | 7.97 | 6.77 - 12.4 | 13.5 | 9.88 - 27.0 | 17.3 |             | 5.21 | 4.23 - 6.42 |
| 6-11  | mU     | DE      | GerES V         | 2015 - 2017   | F,M | 936 |      | 0.20 | 0.11          | 7.50 | 7.16 - 8.00 | 12.0 | 11.3 - 12.7 | 19.4 | 18.3 - 21.9 | 27.1 | 23.8 - 32.6 | 7.55 | 7.18 - 7.95 |
| 6-11  | sU     | SK      | Children cohort | 2015 - 2016   | F,M | 112 |      | 0.20 | 0.00          | 7.49 | 6.53 - 9.02 | 12.6 | 10.6 - 15.5 | 21.4 | 15.8 - 27.1 | 26.6 | 21.7 - 65.8 | 6.94 | 5.84 - 8.26 |
| 12-19 | mU     | DE      | GerES IV 2005   | 2005          | F,M | 51  |      | 0.25 | 0.00          | 9.53 | 7.10 - 12.5 | 16.6 | 12.4 - 26.2 | 33.7 | 22.0 - 46.4 | 45.1 |             | 9.88 | 7.73 - 12.6 |
| 12-19 | mU     | DK      | CPHPUB-Cross    | 2006 - 2008   | F,M | 389 | 0.26 |      | 0.51          | 4.58 | 4.16 - 5.06 | 7.92 | 7.20 - 9.05 | 14.7 | 12.4 - 18.1 | 20.4 | 17.9 - 30.6 | 4.53 | 4.12 - 4.98 |
| 12-19 | sU     | DK      | DYMS 2007       | 2007          | M   | 239 | 0.26 | 0.26 | 2.51          | 4.12 | 3.62 - 4.61 | 7.37 | 6.52 - 8.53 | 13.0 | 10.2 - 17.7 | 18.9 | 15.3 - 32.1 | 3.81 | 3.30 - 4.39 |
| 12-19 | sU     | DK      | DYMS 2008       | 2008          | M   | 261 | 0.26 | 0.26 | 2.30          | 4.46 | 3.90 - 5.39 | 8.70 | 7.64 - 10.1 | 15.2 | 12.7 - 18.0 | 21.7 | 17.5 - 37.7 | 4.23 | 3.69 - 4.85 |
| 12-19 | sU     | DK      | DYMS 2009       | 2009          | M   | 210 | 0.03 | 0.03 | 2.38          | 4.48 | 3.81 - 5.37 | 8.12 | 7.19 - 10.3 | 14.6 | 12.6 - 19.0 | 20.8 | 15.9 - 29.6 | 3.82 | 3.23 - 4.52 |
| 12-19 | sU     | DK      | DYMS 2013       | 2013          | M   | 70  | 0.03 | 0.03 | 0.00          | 3.02 | 2.56 - 4.10 | 6.12 | 4.54 - 10.0 | 14.8 | 9.42 - 33.5 | 27.4 |             | 3.14 | 2.33 - 4.23 |
| 12-19 | mU     | DE      | GerES V         | 2015 - 2017   | F,M | 931 |      | 0.20 | 0.11          | 5.60 | 5.30 - 5.90 | 8.65 | 8.00 - 9.04 | 13.7 | 12.6 - 15.0 | 19.6 | 16.9 - 24.1 | 5.56 | 5.27 - 5.87 |
| 12-19 | sU     | DK      | DYMS 2017       | 2017          | M   | 76  | 0.03 | 0.03 | 0.00          | 2.42 | 1.87 - 3.02 | 4.25 | 3.08 - 5.91 | 6.57 | 5.61 - 24.2 | 12.3 | 6.58 - 180  | 2.63 | 2.06 - 3.36 |
| 20-39 | 24hU   | DE      | ESB 2007        | 2007          | F,M | 60  |      | 0.20 | 0.00          | 2.15 | 1.50 - 2.90 | 4.25 | 3.14 - 6.31 | 7.21 | 4.96 - 15.5 | 10.4 |             | 2.22 | 1.73 - 2.84 |
| 20-39 | sU     | DK      | DYMS 2008       | 2008          | M   | 54  | 0.26 | 0.26 | 0.00          | 5.75 | 4.73 - 7.37 | 9.19 | 7.37 - 11.7 | 13.2 | 10.3 - 20.9 | 14.5 |             | 5.18 | 3.99 - 6.73 |
| 20-39 | 24hU   | DE      | ESB 2008        | 2008          | F,M | 54  |      | 0.50 | 1.85          | 3.63 | 2.76 - 4.05 | 5.27 | 4.07 - 10.7 | 12.2 | 7.57 - 28.1 | 17.6 |             | 3.63 | 2.84 - 4.62 |
| 20-39 | sU     | DK      | DYMS 2009       | 2009          | M   | 79  | 0.03 | 0.03 | 0.00          | 5.08 | 4.29 - 6.47 | 9.56 | 7.08 - 12.2 | 13.8 | 10.8 - 38.5 | 23.6 | 14.1 - 229  | 5.08 | 3.99 - 6.45 |
| 20-39 | 24hU   | DE      | ESB 2009        | 2009          | F,M | 60  |      | 0.20 | 1.67          | 2.40 | 1.71 - 4.28 | 5.85 | 4.30 - 8.94 | 11.4 | 7.90 - 18.6 | 12.2 |             | 2.81 | 2.16 - 3.65 |
| 20-39 | mU     | SE      | DEMOCOPHES-SE   | 2011 - 2012   | F   | 50  |      | 0.30 | 0.00          | 7.88 | 5.85 - 12.1 | 25.0 | 11.6 - 36.5 | 75.5 | 30.5 - 701  | 154  |             | 10.4 | 6.78 - 16.0 |
| 20-39 | mU     | DK      | DEMOCOPHES-DK   | 2011          | F   | 51  |      | 0.26 | 1.96          | 3.48 | 2.08 - 5.57 | 8.76 | 5.31 - 17.1 | 19.1 | 13.4 - 37.4 | 31.1 |             | 3.47 | 2.42 - 4.97 |
| 20-39 | mU     | DE      | DEMOCOPHES-DE   | 2011          | F   | 64  |      | 0.20 | 0.00          | 8.63 | 6.97 - 12.0 | 17.5 | 12.4 - 23.9 | 26.3 | 22.1 - 67.7 | 58.2 |             | 9.86 | 7.79 - 12.5 |
| 20-39 | 24hU   | DE      | ESB 2011        | 2011          | F,M | 60  |      | 0.20 | 0.00          | 2.85 | 2.30 - 3.40 | 4.05 | 3.48 - 7.30 | 10.1 | 6.29 - 70.8 | 23.2 |             | 3.32 | 2.54 - 4.33 |
| 20-39 | sU     | IL      | IBS             | 2011          | F,M | 144 | 0.25 | 0.50 | 0.69          | 15.1 | 12.2 - 17.4 | 29.5 | 22.7 - 40.2 | 55.1 | 48.4 - 71.8 | 72.1 | 59.7 - 186  | 14.5 | 12.0 - 17.4 |

| Age   | Matrix | Country | Data collection | Sampling year | Sex | N  | LOD  | LOQ  | % below limit | P50  | P50_95% CI  | P75  | P75_95% CI  | P90  | P90_95% CI  | P95  | P95_95% CI  | GM   | GM_95% CI   |
|-------|--------|---------|-----------------|---------------|-----|----|------|------|---------------|------|-------------|------|-------------|------|-------------|------|-------------|------|-------------|
| 20-39 | 24hU   | DE      | ESB 2013        | 2013          | F,M | 60 |      | 0.20 | 0.00          | 2.45 | 1.90 - 2.90 | 3.73 | 2.98 - 5.87 | 6.85 | 4.75 - 8.81 | 8.21 |             | 2.52 | 2.08 - 3.05 |
| 20-39 | 24hU   | DE      | ESB 2015        | 2015          | F,M | 60 |      | 0.20 | 0.00          | 2.40 | 1.90 - 2.70 | 4.03 | 2.86 - 6.49 | 8.19 | 5.25 - 17.7 | 15.3 |             | 2.71 | 2.21 - 3.32 |
| 40-59 | mU     | DK      | DEMOCOPHES-DK   | 2011          | F   | 94 |      | 0.26 | 3.19          | 2.35 | 1.81 - 3.03 | 5.40 | 3.34 - 6.77 | 8.28 | 6.79 - 16.7 | 14.5 | 8.93 - 25.4 | 2.33 | 1.86 - 2.92 |
| 40-59 | mU     | DE      | DEMOCOPHES-DE   | 2011          | F   | 53 |      | 0.20 | 0.00          | 5.69 | 4.65 - 7.63 | 10.6 | 7.62 - 17.8 | 21.4 | 14.1 - 39.6 | 32.6 |             | 6.31 | 4.99 - 7.96 |
| 40-59 | sU     | IL      | IBS             | 2011          | F,M | 86 | 0.25 | 0.50 | 3.49          | 13.7 | 9.61 - 15.4 | 20.1 | 16.1 - 25.9 | 35.2 | 24.6 - 67.8 | 62.3 | 36.4 - 294  | 11.6 | 9.14 - 14.7 |

Notes. Matrix: mU - first morning urine, sU - spot urine, 24hU - 24-hours urine; country: AT - Austria, BE - Belgium, CZ - Czech Republic, DE - Germany, DK - Denmark, ES - Spain, HU - Hungary, IL - Israel, LU - Luxembourg, NO - Norway, PL - Poland, SE - Sweden, SI - Slovenia, SK - Slovakia; sex: F - female, M - male; n - sample size; LOD - limit of detection; LOQ - limit of quantification; % below limit - percentage of values below limit of detection/quantification, whichever was applied in the data collection; P50, P75, P90, P95 - 50th, 75th, 90th, 95th percentile; 95% CI - 95 % confidence interval; GM - geometric mean; NA - Not available.

Data only displayed if n was at least 50; percentiles missing when below LOD/LOQ; CIs of the observed percentiles missing when they fall outside the observed range; GM was imputed (fixed imputation) based on a log-normal distribution when at least 50 % of values were above LOD/LOQ.

**Table S15: DiNP metabolite oxo-MiNP (7-Oxo-(Mono-methyl-octyl) phthalate) in microg/L**

| Age   | Matrix | Country | Data collection | Sampling year | Sex | N   | LOD  | LOQ  | % below limit | P50  | P50_95% CI  | P75  | P75_95% CI  | P90  | P90_95% CI  | P95  | P95_95% CI  | GM   | GM_95% CI   |
|-------|--------|---------|-----------------|---------------|-----|-----|------|------|---------------|------|-------------|------|-------------|------|-------------|------|-------------|------|-------------|
| 3-5   | mU     | DE      | GerES IV 2005   | 2005          | F,M | 50  |      | 0.25 | 0.00          | 7.85 | 5.56 - 10.5 | 14.8 | 10.2 - 19.3 | 29.4 | 16.0 - 36.7 | 31.2 |             | 7.33 | 5.58 - 9.64 |
| 3-5   | mU     | DE      | GerES V         | 2015 - 2017   | F,M | 388 |      | 0.20 | 0.00          | 3.10 | 2.90 - 3.40 | 5.90 | 5.26 - 6.49 | 10.2 | 8.50 - 11.9 | 13.4 | 11.8 - 19.9 | 3.26 | 2.98 - 3.57 |
| 3-5   | sU     | SK      | Children cohort | 2015 - 2016   | F,M | 67  |      | 0.20 | 0.00          | 2.45 | 1.69 - 2.77 | 4.55 | 3.22 - 6.29 | 7.49 | 5.83 - 11.5 | 10.5 |             | 2.13 | 1.66 - 2.71 |
| 6-11  | mU     | DE      | GerES IV 2005   | 2005          | F,M | 102 |      | 0.25 | 0.00          | 6.96 | 5.79 - 8.78 | 13.2 | 10.6 - 16.3 | 24.4 | 17.3 - 37.7 | 35.2 | 24.6 - 56.2 | 7.18 | 6.02 - 8.55 |
| 6-11  | sU     | DK      | CPH-MC          | 2006 - 2007   | F,M | 201 | 0.16 |      | 1.49          | 3.13 | 2.60 - 3.51 | 4.78 | 4.10 - 5.46 | 7.41 | 6.24 - 8.72 | 8.95 | 8.29 - 20.3 | 2.62 | 2.27 - 3.02 |
| 6-11  | mU     | DK      | CPHPUB-Cross    | 2006 - 2008   | F,M | 913 | 0.25 |      | 0.33          | 3.83 | 3.55 - 4.17 | 6.42 | 5.98 - 6.92 | 11.2 | 10.4 - 12.8 | 15.8 | 14.0 - 19.7 | 3.76 | 3.55 - 3.98 |
| 6-11  | mU     | SE      | DEMOCOPHES-SE   | 2011 - 2012   | F,M | 98  |      | 0.30 | 0.00          | 5.25 | 4.32 - 6.66 | 9.82 | 8.04 - 12.1 | 17.1 | 12.2 - 41.8 | 40.8 | 17.3 - 192  | 5.71 | 4.68 - 6.98 |
| 6-11  | mU     | DK      | DEMOCOPHES-DK   | 2011          | F,M | 143 |      | 0.25 | 1.40          | 2.58 | 1.97 - 3.16 | 5.08 | 4.00 - 5.95 | 12.3 | 8.09 - 16.6 | 16.7 | 13.8 - 39.0 | 2.64 | 2.18 - 3.20 |
| 6-11  | mU     | DE      | DEMOCOPHES-DE   | 2011          | F,M | 119 |      | 0.20 | 0.00          | 4.44 | 3.70 - 5.13 | 8.65 | 6.50 - 11.2 | 15.8 | 12.4 - 22.4 | 20.9 | 16.5 - 416  | 4.91 | 4.02 - 6.02 |
| 6-11  | mU     | NO      | IES             | 2012          | F,M | 50  | 0.10 | 0.25 | 0.00          | 2.44 | 1.91 - 3.16 | 4.64 | 3.09 - 6.10 | 7.36 | 5.64 - 12.6 | 10.4 |             | 2.64 | 2.13 - 3.26 |
| 6-11  | mU     | DE      | GerES V         | 2015 - 2017   | F,M | 937 |      | 0.20 | 0.21          | 2.90 | 2.70 - 3.00 | 4.80 | 4.40 - 5.10 | 8.50 | 7.74 - 9.54 | 12.3 | 10.5 - 14.5 | 2.94 | 2.78 - 3.11 |
| 6-11  | sU     | SK      | Children cohort | 2015 - 2016   | F,M | 112 |      | 0.20 | 0.00          | 2.77 | 2.43 - 3.70 | 4.42 | 3.97 - 5.88 | 7.42 | 6.11 - 11.9 | 10.9 | 8.55 - 53.1 | 2.60 | 2.15 - 3.15 |
| 12-19 | mU     | DE      | GerES IV 2005   | 2005          | F,M | 51  |      | 0.25 | 0.00          | 4.86 | 3.53 - 6.67 | 8.11 | 6.66 - 13.3 | 17.3 | 9.95 - 25.7 | 20.9 |             | 4.93 | 3.87 - 6.28 |
| 12-19 | mU     | DK      | CPHPUB-Cross    | 2006 - 2008   | F,M | 389 | 0.25 |      | 1.29          | 2.62 | 2.34 - 2.93 | 4.46 | 4.00 - 5.27 | 7.87 | 6.97 - 10.2 | 12.9 | 10.0 - 17.4 | 2.55 | 2.32 - 2.81 |
| 12-19 | sU     | DK      | DYMS 2007       | 2007          | M   | 239 | 0.25 | 0.25 | 4.60          | 1.94 | 1.71 - 2.31 | 3.70 | 3.19 - 4.02 | 6.37 | 5.29 - 9.87 | 11.1 | 8.81 - 14.5 | 1.86 | 1.61 - 2.14 |
| 12-19 | sU     | DK      | DYMS 2008       | 2008          | M   | 261 | 0.25 | 0.25 | 4.21          | 2.39 | 2.02 - 2.73 | 5.15 | 4.06 - 5.95 | 8.15 | 6.86 - 10.4 | 13.0 | 9.16 - 18.7 | 2.23 | 1.95 - 2.56 |
| 12-19 | sU     | DK      | DYMS 2009       | 2009          | M   | 210 | 0.02 | 0.02 | 6.67          | 2.28 | 1.99 - 2.65 | 4.40 | 3.78 - 5.47 | 7.44 | 6.59 - 9.30 | 9.67 | 8.66 - 16.4 | 1.93 | 1.62 - 2.29 |
| 12-19 | sU     | DK      | DYMS 2013       | 2013          | M   | 70  | 0.02 | 0.02 | 1.43          | 1.56 | 1.19 - 2.32 | 3.16 | 2.47 - 5.31 | 9.92 | 4.98 - 21.2 | 17.9 |             | 1.53 | 1.09 - 2.15 |
| 12-19 | mU     | DE      | GerES V         | 2015 - 2017   | F,M | 932 |      | 0.20 | 0.54          | 2.20 | 2.10 - 2.40 | 3.83 | 3.60 - 4.10 | 6.40 | 5.80 - 7.17 | 9.04 | 8.10 - 12.3 | 2.31 | 2.18 - 2.45 |
| 12-19 | sU     | DK      | DYMS 2017       | 2017          | M   | 76  | 0.02 | 0.02 | 0.00          | 1.16 | 0.93 - 1.44 | 2.45 | 1.71 - 3.05 | 3.90 | 3.02 - 14.9 | 7.37 | 3.92 - 87.3 | 1.27 | 0.97 - 1.66 |
| 20-39 | 24hU   | DE      | ESB 2007        | 2007          | F,M | 60  |      | 0.20 | 5.00          | 0.95 | 0.80 - 1.30 | 1.80 | 1.46 - 2.67 | 3.10 | 2.16 - 8.16 | 4.43 |             | 1.07 | 0.85 - 1.34 |
| 20-39 | sU     | DK      | DYMS 2008       | 2008          | M   | 54  | 0.25 | 0.25 | 3.70          | 3.31 | 2.33 - 3.67 | 4.27 | 3.68 - 6.90 | 7.17 | 5.73 - 9.72 | 8.91 |             | 2.66 | 2.06 - 3.45 |
| 20-39 | 24hU   | DE      | ESB 2008        | 2008          | F,M | 54  |      | 0.50 | 9.26          | 2.20 | 1.98 - 2.84 | 3.39 | 2.84 - 5.89 | 8.27 | 5.17 - 21.4 | 12.6 |             | 2.44 | 1.89 - 3.15 |
| 20-39 | sU     | DK      | DYMS 2009       | 2009          | M   | 79  | 0.02 | 0.02 | 1.27          | 2.47 | 1.80 - 2.99 | 4.71 | 3.44 - 6.10 | 8.30 | 6.03 - 15.9 | 12.4 | 8.36 - 148  | 2.38 | 1.85 - 3.06 |
| 20-39 | 24hU   | DE      | ESB 2009        | 2009          | F,M | 60  |      | 0.20 | 5.00          | 1.15 | 0.71 - 1.90 | 3.33 | 2.14 - 4.60 | 5.44 | 4.36 - 8.56 | 7.91 |             | 1.22 | 0.90 - 1.65 |
| 20-39 | mU     | SE      | DEMOCOPHES-SE   | 2011 - 2012   | F   | 50  |      | 0.30 | 0.00          | 4.51 | 3.35 - 6.67 | 9.83 | 6.45 - 24.1 | 55.4 | 16.2 - 510  | 63.8 |             | 5.84 | 3.85 - 8.88 |
| 20-39 | mU     | DK      | DEMOCOPHES-DK   | 2011          | F   | 51  |      | 0.25 | 5.88          | 2.06 | 1.45 - 2.49 | 5.61 | 2.45 - 12.1 | 13.7 | 8.07 - 21.7 | 18.4 |             | 1.91 | 1.30 - 2.79 |
| 20-39 | mU     | DE      | DEMOCOPHES-DE   | 2011          | F   | 64  |      | 0.20 | 0.00          | 2.90 | 2.01 - 3.68 | 5.42 | 3.95 - 8.09 | 11.6 | 7.78 - 36.1 | 27.6 |             | 3.25 | 2.46 - 4.29 |
| 20-39 | 24hU   | DE      | ESB 2011        | 2011          | F,M | 60  |      | 0.20 | 0.00          | 1.65 | 1.20 - 2.00 | 2.62 | 2.08 - 4.64 | 5.50 | 3.95 - 39.0 | 14.3 |             | 1.85 | 1.39 - 2.46 |
| 20-39 | sU     | IL      | IBS             | 2011          | F,M | 144 | 0.25 | 0.50 | 1.39          | 7.75 | 6.51 - 9.66 | 16.9 | 13.7 - 21.7 | 30.1 | 23.0 - 36.5 | 36.5 | 31.7 - 109  | 7.83 | 6.52 - 9.40 |
| 20-39 | 24hU   | DE      | ESB 2013        | 2013          | F,M | 60  |      | 0.20 | 5.00          | 1.10 | 0.90 - 1.40 | 1.62 | 1.40 - 2.49 | 2.71 | 2.06 - 7.76 | 3.96 |             | 1.09 | 0.87 - 1.38 |
| 20-39 | 24hU   | DE      | ESB 2015        | 2015          | F,M | 60  |      | 0.20 | 0.00          | 0.85 | 0.70 - 1.50 | 1.90 | 1.50 - 2.97 | 3.48 | 2.29 - 6.42 | 4.71 |             | 1.08 | 0.86 - 1.36 |
| 40-59 | mU     | DK      | DEMOCOPHES-DK   | 2011          | F   | 94  |      | 0.25 | 13.8          | 1.12 | 0.86 - 1.57 | 2.33 | 2.03 - 3.50 | 5.23 | 3.54 - 8.10 | 7.66 | 5.46 - 14.3 | 1.10 | 0.86 - 1.40 |
| 40-59 | mU     | DE      | DEMOCOPHES-DE   | 2011          | F   | 56  |      | 0.20 | 0.00          | 1.96 | 1.40 - 2.90 | 3.97 | 2.90 - 7.63 | 8.19 | 5.61 - 16.0 | 10.4 |             | 2.10 | 1.61 - 2.74 |

| Age   | Matrix | Country | Data collection | Sampling year | Sex | N  | LOD  | LOQ  | % below limit | P50  | P50_95% CI  | P75  | P75_95% CI  | P90  | P90_95% CI  | P95  | P95_95% CI | GM   | GM_95% CI   |
|-------|--------|---------|-----------------|---------------|-----|----|------|------|---------------|------|-------------|------|-------------|------|-------------|------|------------|------|-------------|
| 40-59 | sU     | IL      | IBS             | 2011          | F,M | 86 | 0.25 | 0.50 | 3.49          | 6.14 | 4.46 - 8.56 | 11.7 | 9.82 - 15.6 | 23.5 | 15.6 - 39.7 | 31.2 | 23.6 - 114 | 6.19 | 4.93 - 7.77 |

Notes. Matrix: mU - first morning urine, sU - spot urine, 24hU - 24-hours urine; country: AT - Austria, BE - Belgium, CZ - Czech Republic, DE - Germany, DK - Denmark, ES - Spain, HU - Hungary, IL - Israel, LU - Luxemburg, NO - Norway, PL - Poland, SE - Sweden, SI - Slovenia, SK - Slovakia; sex: F - female, M - male; n - sample size; LOD - limit of detection; LOQ - limit of quantification; % below limit - percentage of values below limit of detection/quantification, whichever was applied in the data collection; P50, P75, P90, P95 - 50th, 75th, 90th, 95th percentile; 95% CI - 95 % confidence interval; GM - geometric mean; NA - Not available.

Data only displayed if n was at least 50; percentiles missing when below LOD/LOQ; CIs of the observed percentiles missing when they fall outside the observed range; GM was imputed (fixed imputation) based on a log-normal distribution when at least 50 % of values were above LOD/LOQ.

**Table S16: DiNP metabolite MiNP (Mono-methyl-octyl phthalate) in microg/L**

| Age   | Matrix | Country | Data collection | Sampling year | Sex | N   | LOD  | LOQ | % below limit | P50  | P50_95% CI  | P75  | P75_95% CI  | P90  | P90_95% CI  | P95  | P95_95% CI  | GM   | GM_95% CI   |
|-------|--------|---------|-----------------|---------------|-----|-----|------|-----|---------------|------|-------------|------|-------------|------|-------------|------|-------------|------|-------------|
| 3-5   | sU     | DK      | CPH-MC          | 2006          | F,M | 189 | 0.62 |     | 49.7          |      |             | 2.13 | 1.57 - 2.87 | 4.33 | 3.51 - 5.81 | 6.26 | 5.34 - 8.41 |      |             |
| 6-11  | sU     | DK      | CPH-MC          | 2006 - 2007   | F,M | 659 | 0.62 |     | 51.4          |      |             | 1.67 | 1.44 - 1.84 | 3.06 | 2.77 - 3.54 | 4.41 | 3.99 - 5.03 |      |             |
| 6-11  | mU     | DK      | CPHPUB-Cross    | 2006 - 2008   | F,M | 913 | 0.61 |     | 44.6          | 0.71 | 0.66 - 0.78 | 1.53 | 1.33 - 1.71 | 2.96 | 2.63 - 3.36 | 4.41 | 3.90 - 5.27 | 0.72 | 0.67 - 0.77 |
| 6-11  | mU     | DK      | DEMOCOPHES-DK   | 2011          | F,M | 143 | 0.61 |     | 83.9          |      |             |      |             | 1.21 | 0.67 - 3.14 | 3.17 | 2.01 - 9.24 |      |             |
| 12-19 | mU     | DK      | CPHPUB-Cross    | 2006 - 2008   | F,M | 389 | 0.61 |     | 56.0          |      |             | 1.03 | 0.90 - 1.28 | 2.26 | 1.85 - 2.77 | 3.46 | 2.73 - 6.04 |      |             |
| 20-39 | mU     | DK      | DEMOCOPHES-DK   | 2011          | F   | 51  | 0.61 |     | 76.5          |      |             |      |             | 1.93 | 1.07 - 5.41 | 3.27 |             |      |             |
| 40-59 | mU     | DK      | DEMOCOPHES-DK   | 2011          | F   | 94  | 0.61 |     | 89.4          |      |             |      |             |      |             | 1.12 | 0.81 - 2.93 |      |             |

Notes. Matrix: mU - first morning urine, sU - spot urine, 24hU - 24-hours urine; country: AT - Austria, BE - Belgium, CZ - Czech Republic, DE - Germany, DK - Denmark, ES - Spain, HU - Hungary, IL - Israel, LU - Luxemburg, NO - Norway, PL - Poland, SE - Sweden, SI - Slovenia, SK - Slovakia; sex: F - female, M - male; n - sample size; LOD - limit of detection; LOQ - limit of quantification; % below limit - percentage of values below limit of detection/quantification, whichever was applied in the data collection; P50, P75, P90, P95 - 50th, 75th, 90th, 95th percentile; 95% CI - 95 % confidence interval; GM - geometric mean; NA - Not available.

Data only displayed if n was at least 50; percentiles missing when below LOD/LOQ; CIs of the observed percentiles missing when they fall outside the observed range; GM was imputed (fixed imputation) based on a log-normal distribution when at least 50 % of values were above LOD/LOQ.



**Table S17: DiDP metabolite cx-MiDP (Mono(2,7-methyl-7- carboxy-heptyl) phthalate) in microg/L**

| Age   | Matrix | Country | Data collection | Sampling year | Sex | N   | LOD  | LOQ  | % below limit | P50  | P50_95% CI  | P75  | P75_95% CI  | P90  | P90_95% CI  | P95  | P95_95% CI  | GM   | GM_95% CI   |
|-------|--------|---------|-----------------|---------------|-----|-----|------|------|---------------|------|-------------|------|-------------|------|-------------|------|-------------|------|-------------|
| 3-5   | mU     | DE      | GerES V         | 2015 - 2017   | F,M | 387 |      | 0.20 | 0.78          | 1.10 | 1.00 - 1.20 | 1.90 | 1.78 - 2.20 | 2.90 | 2.60 - 3.50 | 3.80 | 3.50 - 4.80 | 1.12 | 1.03 - 1.21 |
| 6-11  | mU     | LU      | DEMOCOPHES-LU   | 2011 - 2012   | F,M | 59  |      | 0.20 | 0.00          | 1.40 | 1.20 - 1.78 | 2.54 | 1.83 - 3.67 | 4.49 | 2.93 - 7.16 | 6.53 |             | 1.48 | 1.20 - 1.83 |
| 6-11  | mU     | DE      | DEMOCOPHES-DE   | 2011          | F,M | 119 |      | 0.20 | 2.52          | 1.09 | 0.86 - 1.24 | 1.77 | 1.43 - 2.19 | 2.68 | 2.28 - 4.02 | 3.51 | 2.85 - 12.5 | 1.06 | 0.91 - 1.23 |
| 6-11  | mU     | BE      | DEMOCOPHES-BE   | 2011 - 2012   | F,M | 117 |      | 0.10 | 0.00          | 1.38 | 1.17 - 1.59 | 2.15 | 1.83 - 2.58 | 3.15 | 2.75 - 5.11 | 5.02 | 3.98 - 10.8 | 1.43 | 1.24 - 1.64 |
| 6-11  | mU     | DE      | GerES V         | 2015 - 2017   | F,M | 937 |      | 0.20 | 1.60          | 0.90 | 0.90 - 1.00 | 1.50 | 1.40 - 1.60 | 2.60 | 2.30 - 3.10 | 4.30 | 3.80 - 5.43 | 0.97 | 0.92 - 1.02 |
| 12-19 | sU     | DK      | DYMS 2009       | 2009          | M   | 69  | 0.02 | 0.02 | 10.1          | 0.80 | 0.66 - 1.01 | 1.33 | 1.12 - 1.76 | 2.54 | 1.60 - 4.24 | 3.12 |             | 0.54 | 0.38 - 0.77 |
| 12-19 | sU     | DK      | DYMS 2013       | 2013          | M   | 70  | 0.02 | 0.02 | 5.71          | 0.71 | 0.55 - 0.88 | 1.05 | 0.89 - 1.57 | 2.19 | 1.39 - 3.52 | 3.10 |             | 0.59 | 0.41 - 0.84 |
| 12-19 | mU     | DE      | GerES V         | 2015 - 2017   | F,M | 932 |      | 0.20 | 3.97          | 0.70 | 0.70 - 0.70 | 1.20 | 1.10 - 1.20 | 1.80 | 1.70 - 2.10 | 2.70 | 2.40 - 3.15 | 0.73 | 0.70 - 0.77 |
| 12-19 | sU     | DK      | DYMS 2017       | 2017          | M   | 76  | 0.02 | 0.02 | 6.58          | 0.35 | 0.23 - 0.44 | 0.61 | 0.48 - 0.79 | 1.24 | 0.72 - 2.28 | 2.21 | 1.26 - 4.57 | 0.28 | 0.21 - 0.38 |
| 20-39 | 24hU   | DE      | ESB 2007        | 2007          | F,M | 60  |      | 0.20 | 0.00          | 0.50 | 0.40 - 0.60 | 0.90 | 0.60 - 1.40 | 1.83 | 1.20 - 3.92 | 3.21 |             | 0.63 | 0.51 - 0.77 |
| 20-39 | 24hU   | DE      | ESB 2009        | 2009          | F,M | 60  |      | 0.20 | 5.00          | 0.50 | 0.40 - 0.60 | 0.82 | 0.60 - 0.97 | 1.21 | 0.90 - 4.13 | 1.52 |             | 0.52 | 0.42 - 0.64 |
| 20-39 | mU     | DE      | DEMOCOPHES-DE   | 2011          | F   | 64  |      | 0.20 | 6.25          | 0.71 | 0.53 - 0.93 | 1.18 | 0.95 - 1.59 | 1.99 | 1.46 - 2.69 | 2.48 |             | 0.69 | 0.57 - 0.83 |
| 20-39 | 24hU   | DE      | ESB 2011        | 2011          | F,M | 60  |      | 0.20 | 13.3          | 0.60 | 0.50 - 0.60 | 0.80 | 0.60 - 1.00 | 1.61 | 1.00 - 3.06 | 2.71 |             | 0.56 | 0.44 - 0.70 |
| 20-39 | 24hU   | DE      | ESB 2013        | 2013          | F,M | 60  |      | 0.20 | 23.3          | 0.40 | 0.30 - 0.50 | 0.60 | 0.50 - 0.87 | 1.00 | 0.80 - 2.05 | 1.11 |             | 0.37 | 0.30 - 0.46 |
| 20-39 | 24hU   | DE      | ESB 2015        | 2015          | F,M | 60  |      | 0.20 | 18.3          | 0.40 | 0.30 - 0.40 | 0.52 | 0.40 - 0.80 | 1.01 | 0.76 - 2.05 | 1.51 |             | 0.37 | 0.30 - 0.46 |
| 40-59 | mU     | DE      | DEMOCOPHES-DE   | 2011          | F   | 56  |      | 0.20 | 19.6          | 0.50 | 0.39 - 0.78 | 1.23 | 0.80 - 1.53 | 1.75 | 1.48 - 2.93 | 2.45 |             | 0.52 | 0.40 - 0.68 |

Notes. Matrix: mU - first morning urine, sU - spot urine, 24hU - 24-hours urine; country: AT - Austria, BE - Belgium, CZ - Czech Republic, DE - Germany, DK - Denmark, ES - Spain, HU - Hungary, IL - Israel, LU - Luxemburg, NO - Norway, PL - Poland, SE - Sweden, SI - Slovenia, SK - Slovakia; sex: F - female, M - male; n - sample size; LOD - limit of detection; LOQ - limit of quantification; % below limit - percentage of values below limit of detection/quantification, whichever was applied in the data collection; P50, P75, P90, P95 - 50th, 75th, 90th, 95th percentile; 95% CI - 95 % confidence interval; GM - geometric mean; NA - Not available.

Data only displayed if n was at least 50; percentiles missing when below LOD/LOQ; CIs of the observed percentiles missing when they fall outside the observed range; GM was imputed (fixed imputation) based on a log-normal distribution when at least 50 % of values were above LOD/LOQ.



**Table S18: DiDP metabolite OH-MiDP (6-OH-Mono-propyl-heptyl phthalate) in microg/L**

| Age   | Matrix | Country | Data collection | Sampling year | Sex | N   | LOD  | LOQ  | % below limit | P50  | P50_95% CI  | P75  | P75_95% CI  | P90  | P90_95% CI  | P95  | P95_95% CI  | GM   | GM_95% CI   |
|-------|--------|---------|-----------------|---------------|-----|-----|------|------|---------------|------|-------------|------|-------------|------|-------------|------|-------------|------|-------------|
| 3-5   | mU     | DE      | GerES V         | 2015 - 2017   | F,M | 388 |      | 0.20 | 0.77          | 1.70 | 1.60 - 2.00 | 3.42 | 3.00 - 3.80 | 5.43 | 4.80 - 6.89 | 8.43 | 6.83 - 11.1 | 1.81 | 1.65 - 1.98 |
| 3-5   | sU     | SK      | Children cohort | 2015 - 2016   | F,M | 67  |      | 0.20 | 0.00          | 1.42 |             | 2.97 |             | 4.40 |             | 6.14 |             |      |             |
| 6-11  | mU     | LU      | DEMOCOPHES-LU   | 2011 - 2012   | F,M | 59  |      | 0.20 | 1.69          | 2.02 | 1.61 - 2.87 | 4.09 | 3.18 - 5.38 | 6.84 | 5.05 - 19.1 | 9.89 |             | 2.14 | 1.64 - 2.79 |
| 6-11  | mU     | DE      | DEMOCOPHES-DE   | 2011          | F,M | 119 |      | 0.20 | 0.00          | 2.30 | 2.00 - 2.69 | 3.79 | 3.15 - 5.05 | 5.70 | 5.13 - 11.3 | 10.6 | 5.95 - 17.7 | 2.34 | 2.00 - 2.73 |
| 6-11  | mU     | BE      | DEMOCOPHES-BE   | 2011 - 2012   | F,M | 117 |      | 0.10 | 19.7          | 0.61 | 0.52 - 0.77 | 1.54 | 1.27 - 2.22 | 3.67 | 2.47 - 5.57 | 5.44 | 3.80 - 11.7 | 0.60 | 0.46 - 0.78 |
| 6-11  | mU     | CZ      | DEMOCOPHES-CZ   | 2011 - 2012   | F,M | 118 | 0.20 | 0.60 | 91.5          |      |             |      |             |      |             | 0.71 |             |      |             |
| 6-11  | mU     | DE      | GerES V         | 2015 - 2017   | F,M | 937 |      | 0.20 | 0.85          | 1.60 | 1.50 - 1.70 | 2.80 | 2.60 - 3.00 | 4.90 | 4.34 - 5.80 | 8.06 | 6.71 - 10.1 | 1.65 | 1.56 - 1.75 |
| 6-11  | sU     | SK      | Children cohort | 2015 - 2016   | F,M | 112 |      | 0.20 | 0.00          | 1.54 | 1.25 - 2.01 | 2.84 | 2.29 - 3.26 | 4.13 | 3.33 - 6.64 | 6.39 | 4.15 - 7.36 | 1.46 | 1.23 - 1.73 |
| 12-19 | sU     | DK      | DYMS 2009       | 2009          | M   | 69  | 0.02 | 0.02 | 11.6          | 0.45 | 0.32 - 0.97 | 1.43 | 1.03 - 1.84 | 2.07 | 1.73 - 2.66 | 2.61 |             | 0.35 | 0.23 - 0.52 |
| 12-19 | sU     | DK      | DYMS 2013       | 2013          | M   | 70  | 0.02 | 0.02 | 7.14          | 0.50 | 0.44 - 0.83 | 1.03 | 0.89 - 1.60 | 2.25 | 1.41 - 8.23 | 3.57 |             | 0.51 | 0.35 - 0.76 |
| 12-19 | mU     | DE      | GerES V         | 2015 - 2017   | F,M | 932 |      | 0.20 | 2.90          | 1.30 | 1.20 - 1.34 | 2.20 | 2.00 - 2.30 | 3.60 | 3.30 - 4.00 | 5.30 | 4.80 - 6.40 | 1.27 | 1.20 - 1.35 |
| 12-19 | sU     | DK      | DYMS 2017       | 2017          | M   | 76  | 0.02 | 0.02 | 2.63          | 0.40 | 0.31 - 0.55 | 0.74 | 0.56 - 1.15 | 1.44 | 0.92 - 6.86 | 4.24 | 1.45 - 17.8 | 0.41 | 0.30 - 0.55 |
| 20-39 | 24hU   | DE      | ESB 2007        | 2007          | F,M | 60  |      | 0.20 | 3.33          | 0.70 | 0.50 - 1.00 | 1.23 | 1.00 - 1.77 | 2.37 | 1.66 - 5.39 | 3.94 |             | 0.80 | 0.63 - 1.01 |
| 20-39 | 24hU   | DE      | ESB 2009        | 2009          | F,M | 60  |      | 0.20 | 10.0          | 0.70 | 0.50 - 0.90 | 1.20 | 0.90 - 1.77 | 1.92 | 1.56 - 4.83 | 2.42 |             | 0.69 | 0.54 - 0.88 |
| 20-39 | mU     | DE      | DEMOCOPHES-DE   | 2011          | F   | 64  |      | 0.20 | 0.00          | 1.66 | 1.31 - 1.92 | 2.62 | 1.96 - 3.35 | 4.55 | 3.01 - 7.14 | 5.44 |             | 1.69 | 1.41 - 2.02 |
| 20-39 | 24hU   | DE      | ESB 2011        | 2011          | F,M | 60  |      | 0.20 | 5.00          | 0.95 | 0.70 - 1.10 | 1.20 | 1.10 - 1.80 | 3.71 | 1.70 - 13.0 | 5.88 |             | 0.93 | 0.70 - 1.22 |
| 20-39 | 24hU   | DE      | ESB 2013        | 2013          | F,M | 60  |      | 0.20 | 10.0          | 0.80 | 0.60 - 1.00 | 1.30 | 1.00 - 1.70 | 1.92 | 1.46 - 5.65 | 3.00 |             | 0.76 | 0.61 - 0.96 |
| 20-39 | 24hU   | DE      | ESB 2015        | 2015          | F,M | 60  |      | 0.20 | 3.33          | 0.80 | 0.50 - 0.90 | 1.20 | 0.90 - 1.47 | 1.60 | 1.40 - 3.95 | 3.41 |             | 0.70 | 0.57 - 0.86 |
| 40-59 | mU     | DE      | DEMOCOPHES-DE   | 2011          | F   | 56  |      | 0.20 | 0.00          | 1.08 | 0.75 - 1.71 | 2.13 | 1.71 - 3.35 | 3.66 | 2.63 - 4.88 | 4.28 |             | 1.10 | 0.87 - 1.39 |

Notes. Matrix: mU - first morning urine, sU - spot urine, 24hU - 24-hours urine; country: AT - Austria, BE - Belgium, CZ - Czech Republic, DE - Germany, DK - Denmark, ES - Spain, HU - Hungary, IL - Israel, LU - Luxembourg, NO - Norway, PL - Poland, SE - Sweden, SI - Slovenia, SK - Slovakia; sex: F - female, M - male; n - sample size; LOD - limit of detection; LOQ - limit of quantification; % below limit - percentage of values below limit of detection/quantification, whichever was applied in the data collection; P50, P75, P90, P95 - 50th, 75th, 90th, 95th percentile; 95% CI - 95 % confidence interval; GM - geometric mean; NA - Not available.

Data only displayed if n was at least 50; percentiles missing when below LOD/LOQ; CIs of the observed percentiles missing when they fall outside the observed range; GM was imputed (fixed imputation) based on a log-normal distribution when at least 50 % of values were above LOD/LOQ.



**Table S19: DiDP metabolite oxo-MiDP (6-Oxo-Mono-propyl-heptyl phthalate) in microg/L**

| Age   | Matrix | Country | Data collection | Sampling year | Sex | N   | LOD  | LOQ  | % below limit | P50  | P50_95% CI  | P75  | P75_95% CI  | P90  | P90_95% CI  | P95  | P95_95% CI  | GM   | GM_95% CI   |
|-------|--------|---------|-----------------|---------------|-----|-----|------|------|---------------|------|-------------|------|-------------|------|-------------|------|-------------|------|-------------|
| 3-5   | mU     | DE      | GerES V         | 2015 - 2017   | F,M | 388 |      | 0.20 | 10.1          | 0.70 | 0.60 - 0.80 | 1.32 | 1.16 - 1.60 | 2.23 | 2.00 - 2.89 | 3.63 | 2.83 - 6.12 | 0.71 | 0.64 - 0.78 |
| 3-5   | sU     | SK      | Children cohort | 2015 - 2016   | F,M | 67  |      | 0.20 | 0.00          | 0.60 |             | 0.93 |             | 1.62 |             | 2.54 |             |      |             |
| 6-11  | mU     | DE      | DEMOCOPHES-DE   | 2011          | F,M | 119 |      | 0.20 | 19.3          | 0.45 | 0.40 - 0.61 | 1.01 | 0.79 - 1.29 | 1.79 | 1.36 - 3.18 | 2.98 | 1.95 - 5.87 | 0.51 | 0.42 - 0.61 |
| 6-11  | mU     | DE      | GerES V         | 2015 - 2017   | F,M | 937 |      | 0.20 | 9.39          | 0.60 | 0.60 - 0.70 | 1.20 | 1.10 - 1.30 | 2.20 | 2.00 - 2.50 | 3.40 | 2.91 - 4.15 | 0.68 | 0.64 - 0.72 |
| 6-11  | sU     | SK      | Children cohort | 2015 - 2016   | F,M | 112 |      | 0.20 | 0.00          | 0.48 |             | 0.85 |             | 1.31 |             | 2.05 |             |      |             |
| 12-19 | sU     | DK      | DYMS 2009       | 2009          | M   | 69  | 0.02 | 0.02 | 4.35          | 0.58 | 0.48 - 0.72 | 1.02 | 0.83 - 1.32 | 1.55 | 1.26 - 2.15 | 2.08 |             | 0.44 | 0.32 - 0.59 |
| 12-19 | sU     | DK      | DYMS 2013       | 2013          | M   | 70  | 0.02 | 0.02 | 5.71          | 0.75 | 0.55 - 0.96 | 1.13 | 1.03 - 1.33 | 1.51 | 1.27 - 3.37 | 2.79 |             | 0.62 | 0.45 - 0.87 |
| 12-19 | mU     | DE      | GerES V         | 2015 - 2017   | F,M | 932 |      | 0.20 | 14.9          | 0.50 | 0.50 - 0.60 | 1.00 | 0.90 - 1.10 | 1.79 | 1.60 - 1.90 | 2.60 | 2.20 - 3.05 | 0.54 | 0.51 - 0.57 |
| 12-19 | sU     | DK      | DYMS 2017       | 2017          | M   | 76  | 0.02 | 0.02 | 0.00          | 0.95 | 0.68 - 1.10 | 1.54 | 1.15 - 2.01 | 2.62 | 1.88 - 8.09 | 4.47 | 2.62 - 33.5 | 0.93 | 0.75 - 1.17 |
| 20-39 | 24hU   | DE      | ESB 2007        | 2007          | F,M | 60  |      | 0.20 | 33.3          | 0.30 | 0.20 - 0.40 | 0.50 | 0.40 - 0.87 | 1.04 | 0.76 - 2.43 | 1.73 |             | 0.30 | 0.23 - 0.39 |
| 20-39 | 24hU   | DE      | ESB 2009        | 2009          | F,M | 60  |      | 0.20 | 35.0          | 0.30 | 0.20 - 0.40 | 0.40 | 0.40 - 0.60 | 0.60 | 0.50 - 1.46 | 1.11 |             | 0.28 | 0.23 - 0.34 |
| 20-39 | mU     | DE      | DEMOCOPHES-DE   | 2011          | F   | 64  |      | 0.20 | 28.1          | 0.36 | 0.24 - 0.53 | 0.72 | 0.55 - 0.88 | 1.08 | 0.83 - 4.88 | 1.56 |             | 0.38 | 0.30 - 0.49 |
| 20-39 | 24hU   | DE      | ESB 2011        | 2011          | F,M | 60  |      | 0.20 | 46.7          | 0.20 |             | 0.50 | 0.40 - 0.60 | 0.81 | 0.60 - 3.61 | 1.49 |             | 0.22 | 0.17 - 0.30 |
| 20-39 | 24hU   | DE      | ESB 2013        | 2013          | F,M | 60  |      | 0.20 | 43.3          | 0.20 |             | 0.42 | 0.30 - 0.70 | 0.80 | 0.60 - 2.30 | 1.64 |             | 0.21 | 0.16 - 0.28 |
| 20-39 | 24hU   | DE      | ESB 2015        | 2015          | F,M | 60  |      | 0.20 | 43.3          | 0.30 |             | 0.50 | 0.40 - 0.60 | 0.70 | 0.60 - 0.92 | 0.80 |             | 0.28 | 0.24 - 0.34 |
| 40-59 | mU     | DE      | DEMOCOPHES-DE   | 2011          | F   | 56  |      | 0.20 | 48.2          | 0.20 |             | 0.63 | 0.44 - 0.91 | 0.97 | 0.77 - 2.10 | 1.66 |             | 0.23 | 0.17 - 0.31 |

Notes. Matrix: mU - first morning urine, sU - spot urine, 24hU - 24-hours urine; country: AT - Austria, BE - Belgium, CZ - Czech Republic, DE - Germany, DK - Denmark, ES - Spain, HU - Hungary, IL - Israel, LU - Luxembourg, NO - Norway, PL - Poland, SE - Sweden, SI - Slovenia, SK - Slovakia; sex: F - female, M - male; n - sample size; LOD - limit of detection; LOQ - limit of quantification; % below limit - percentage of values below limit of detection/quantification, whichever was applied in the data collection; P50, P75, P90, P95 - 50th, 75th, 90th, 95th percentile; 95% CI - 95 % confidence interval; GM - geometric mean; NA - Not available.

Data only displayed if n was at least 50; percentiles missing when below LOD/LOQ; CIs of the observed percentiles missing when they fall outside the observed range; GM was imputed (fixed imputation) based on a log-normal distribution when at least 50 % of values were above LOD/LOQ.



**Table S20: DINCH metabolite cx-MINCH (cyclohexane-1,2- dicarboxylate-mono-(7- carboxylate-4- methyl)heptyl ester) in microg/L**

| Age   | Matrix | Country | Data collection | Sampling year | Sex | N   | LOD  | LOQ  | % below limit | P50  | P50_95% CI  | P75  | P75_95% CI  | P90  | P90_95% CI  | P95  | P95_95% CI  | GM   | GM_95% CI   |
|-------|--------|---------|-----------------|---------------|-----|-----|------|------|---------------|------|-------------|------|-------------|------|-------------|------|-------------|------|-------------|
| 3-5   | mU     | DE      | GerES V         | 2015 - 2017   | F,M | 378 |      | 0.05 | 0.53          | 2.06 | 1.82 - 2.25 | 4.05 | 3.41 - 4.49 | 7.54 | 6.78 - 9.24 | 11.1 | 9.11 - 14.9 | 2.16 | 1.95 - 2.40 |
| 6-11  | mU     | DE      | GerES V         | 2015 - 2017   | F,M | 927 |      | 0.05 | 0.76          | 1.14 | 1.07 - 1.23 | 2.23 | 2.10 - 2.38 | 4.37 | 3.80 - 5.04 | 7.50 | 5.99 - 9.24 | 1.23 | 1.15 - 1.31 |
| 12-19 | sU     | DK      | DYMS 2009       | 2009          | M   | 69  | 0.02 | 0.02 | 23.2          | 0.36 | 0.13 - 0.80 | 2.31 | 1.20 - 4.55 | 8.28 | 4.22 - 29.4 | 13.6 |             | 0.28 | 0.15 - 0.55 |
| 12-19 | sU     | DK      | DYMS 2013       | 2013          | M   | 70  | 0.02 | 0.02 | 5.71          | 0.54 | 0.35 - 0.81 | 1.38 | 0.91 - 3.28 | 5.80 | 2.40 - 13.5 | 8.44 |             | 0.51 | 0.33 - 0.77 |
| 12-19 | mU     | DE      | GerES V         | 2015 - 2017   | F,M | 919 |      | 0.05 | 1.20          | 0.81 | 0.75 - 0.87 | 1.59 | 1.45 - 1.80 | 3.19 | 2.84 - 3.72 | 4.64 | 4.26 - 5.89 | 0.83 | 0.77 - 0.89 |
| 12-19 | sU     | DK      | DYMS 2017       | 2017          | M   | 76  | 0.02 | 0.02 | 3.95          | 0.49 | 0.31 - 0.80 | 1.80 | 0.91 - 5.62 | 8.26 | 3.90 - 14.1 | 13.4 | 8.27 - 70.8 | 0.63 | 0.42 - 0.94 |
| 20-39 | 24hU   | DE      | ESB 2009        | 2009          | F,M | 60  |      | 0.05 | 71.7          |      |             | 0.06 |             | 0.15 | 0.11 - 1.45 | 0.88 |             |      |             |
| 20-39 | 24hU   | DE      | ESB 2010        | 2010          | F,M | 60  |      | 0.05 | 71.7          |      |             | 0.11 |             | 0.38 | 0.22 - 1.47 | 1.11 |             |      |             |
| 20-39 | 24hU   | DE      | ESB 2011        | 2011          | F,M | 60  |      | 0.05 | 41.7          | 0.09 |             | 0.34 | 0.19 - 0.60 | 1.16 | 0.45 - 8.62 | 3.36 |             | 0.08 | 0.05 - 0.14 |
| 20-39 | 24hU   | DE      | ESB 2012        | 2012          | F,M | 56  |      | 0.05 | 12.5          | 0.17 | 0.12 - 0.26 | 0.34 | 0.27 - 0.58 | 0.64 | 0.48 - 2.00 | 0.85 |             | 0.19 | 0.13 - 0.26 |
| 20-39 | 24hU   | DE      | ESB 2013        | 2013          | F,M | 60  |      | 0.05 | 21.7          | 0.13 | 0.10 - 0.19 | 0.29 | 0.19 - 0.36 | 0.54 | 0.34 - 0.92 | 0.87 |             | 0.13 | 0.10 - 0.18 |
| 20-39 | 24hU   | DE      | ESB 2015        | 2015          | F,M | 60  |      | 0.05 | 20.0          | 0.21 | 0.17 - 0.26 | 0.35 | 0.26 - 0.42 | 0.60 | 0.41 - 3.60 | 1.33 |             | 0.18 | 0.13 - 0.25 |
| 20-39 | 24hU   | DE      | ESB 2017        | 2017          | F,M | 60  |      | 0.05 | 13.3          | 0.20 | 0.16 - 0.27 | 0.38 | 0.29 - 0.61 | 0.86 | 0.47 - 2.82 | 1.02 |             | 0.21 | 0.16 - 0.28 |

Notes. Matrix: mU - first morning urine, sU - spot urine, 24hU - 24-hours urine; country: AT - Austria, BE - Belgium, CZ - Czech Republic, DE - Germany, DK - Denmark, ES - Spain, HU - Hungary, IL - Israel, LU - Luxembourg, NO - Norway, PL - Poland, SE - Sweden, SI - Slovenia, SK - Slovakia; sex: F - female, M - male; n - sample size; LOD - limit of detection; LOQ - limit of quantification; % below limit - percentage of values below limit of detection/quantification, whichever was applied in the data collection; P50, P75, P90, P95 - 50th, 75th, 90th, 95th percentile; 95% CI - 95 % confidence interval; GM - geometric mean; NA - Not available.

Data only displayed if n was at least 50; percentiles missing when below LOD/LOQ; CIs of the observed percentiles missing when they fall outside the observed range; GM was imputed (fixed imputation) based on a log-normal distribution when at least 50 % of values were above LOD/LOQ.



**Table S21: DINCH metabolite OH-MINCH (cyclohexane-1,2- dicarboxylate-mono-(7- hydroxy-4-methyl)octyl ester) in microg/L**

| Age   | Matrix | Country | Data collection | Sampling year | Sex | N   | LOD  | LOQ  | % below limit | P50  | P50_95% CI  | P75  | P75_95% CI  | P90  | P90_95% CI  | P95  | P95_95% CI  | GM   | GM_95% CI   |
|-------|--------|---------|-----------------|---------------|-----|-----|------|------|---------------|------|-------------|------|-------------|------|-------------|------|-------------|------|-------------|
| 3-5   | mU     | DE      | GerES V         | 2015 - 2017   | F,M | 378 |      | 0.05 | 0.00          | 4.14 | 3.60 - 4.53 | 7.86 | 7.09 - 9.85 | 16.2 | 12.4 - 19.5 | 22.6 | 19.4 - 31.0 | 4.39 | 3.97 - 4.86 |
| 6-11  | mU     | DE      | GerES V         | 2015 - 2017   | F,M | 929 |      | 0.05 | 0.22          | 2.27 | 2.08 - 2.46 | 4.50 | 4.08 - 4.91 | 9.42 | 8.45 - 10.6 | 15.6 | 12.6 - 22.5 | 2.48 | 2.31 - 2.65 |
| 12-19 | sU     | DK      | DYMS 2009       | 2009          | M   | 69  | 0.02 | 0.02 | 21.7          | 0.74 | 0.45 - 1.49 | 2.76 | 1.92 - 6.81 | 13.8 | 4.20 - 31.7 | 24.4 |             | 0.50 | 0.26 - 0.95 |
| 12-19 | sU     | DK      | DYMS 2013       | 2013          | M   | 70  | 0.02 | 0.02 | 8.57          | 1.01 | 0.70 - 1.70 | 3.43 | 1.92 - 7.19 | 13.3 | 6.29 - 25.8 | 23.2 |             | 0.93 | 0.57 - 1.51 |
| 12-19 | mU     | DE      | GerES V         | 2015 - 2017   | F,M | 921 |      | 0.05 | 0.33          | 1.51 | 1.39 - 1.61 | 3.15 | 2.76 - 3.53 | 7.05 | 6.21 - 8.11 | 10.7 | 9.45 - 14.3 | 1.62 | 1.50 - 1.74 |
| 12-19 | sU     | DK      | DYMS 2017       | 2017          | M   | 76  | 0.02 | 0.02 | 2.63          | 1.18 | 0.91 - 1.85 | 3.75 | 1.99 - 6.64 | 15.2 | 5.93 - 34.1 | 28.5 | 15.4 - 142  | 1.61 | 1.12 - 2.31 |
| 20-39 | 24hU   | DE      | ESB 2009        | 2009          | F,M | 60  |      | 0.05 | 56.7          |      |             | 0.13 | 0.07 - 0.22 | 0.37 | 0.18 - 3.44 | 1.01 |             |      |             |
| 20-39 | 24hU   | DE      | ESB 2010        | 2010          | F,M | 60  |      | 0.05 | 20.0          | 0.14 | 0.10 - 0.24 | 0.52 | 0.26 - 1.02 | 1.11 | 0.90 - 4.62 | 3.23 |             | 0.17 | 0.12 - 0.26 |
| 20-39 | 24hU   | DE      | ESB 2011        | 2011          | F,M | 60  |      | 0.05 | 1.67          | 0.31 | 0.20 - 0.53 | 0.93 | 0.55 - 2.19 | 4.20 | 1.20 - 39.4 | 8.23 |             | 0.43 | 0.28 - 0.64 |
| 20-39 | 24hU   | DE      | ESB 2012        | 2012          | F,M | 56  |      | 0.05 | 1.79          | 0.39 | 0.25 - 0.50 | 0.70 | 0.52 - 1.32 | 1.55 | 1.08 - 4.28 | 2.04 |             | 0.41 | 0.28 - 0.58 |
| 20-39 | 24hU   | DE      | ESB 2013        | 2013          | F,M | 60  |      | 0.05 | 0.00          | 0.37 | 0.31 - 0.43 | 0.67 | 0.43 - 1.20 | 1.38 | 1.05 - 4.06 | 2.81 |             | 0.45 | 0.35 - 0.58 |
| 20-39 | 24hU   | DE      | ESB 2015        | 2015          | F,M | 60  |      | 0.05 | 0.00          | 0.58 | 0.54 - 0.77 | 1.10 | 0.80 - 1.45 | 1.74 | 1.25 - 11.1 | 3.53 |             | 0.64 | 0.48 - 0.84 |
| 20-39 | 24hU   | DE      | ESB 2017        | 2017          | F,M | 60  |      | 0.05 | 0.00          | 0.70 | 0.48 - 0.89 | 1.24 | 0.91 - 1.85 | 2.42 | 1.52 - 8.01 | 3.96 |             | 0.70 | 0.54 - 0.90 |

Notes. Matrix: mU - first morning urine, sU - spot urine, 24hU - 24-hours urine; country: AT - Austria, BE - Belgium, CZ - Czech Republic, DE - Germany, DK - Denmark, ES - Spain, HU - Hungary, IL - Israel, LU - Luxembourg, NO - Norway, PL - Poland, SE - Sweden, SI - Slovenia, SK - Slovakia; sex: F - female, M - male; n - sample size; LOD - limit of detection; LOQ - limit of quantification; % below limit - percentage of values below limit of detection/quantification, whichever was applied in the data collection; P50, P75, P90, P95 - 50th, 75th, 90th, 95th percentile; 95% CI - 95 % confidence interval; GM - geometric mean; NA - Not available.

Data only displayed if n was at least 50; percentiles missing when below LOD/LOQ; CIs of the observed percentiles missing when they fall outside the observed range; GM was imputed (fixed imputation) based on a log-normal distribution when at least 50 % of values were above LOD/LOQ.



**Table S22: DINCH metabolite oxo-MINCH (cyclohexane-1,2- dicarboxylate-mono-(7-oxo- 4-methyl)octyl ester) in microg/L**

| Age   | Matrix | Country | Data collection | Sampling year | Sex | N   | LOD | LOQ  | % below limit | P50  | P50_95% CI  | P75  | P75_95% CI  | P90  | P90_95% CI  | P95  | P95_95% CI  | GM   | GM_95% CI   |
|-------|--------|---------|-----------------|---------------|-----|-----|-----|------|---------------|------|-------------|------|-------------|------|-------------|------|-------------|------|-------------|
| 3-5   | mU     | DE      | GerES V         | 2015 - 2017   | F,M | 378 |     | 0.05 | 1.06          | 1.88 | 1.61 - 2.07 | 3.56 | 3.06 - 4.27 | 7.47 | 6.51 - 8.65 | 10.3 | 8.62 - 14.1 | 1.82 | 1.62 - 2.05 |
| 6-11  | mU     | DE      | GerES V         | 2015 - 2017   | F,M | 930 |     | 0.05 | 1.51          | 0.94 | 0.87 - 1.02 | 2.11 | 1.86 - 2.40 | 4.59 | 4.18 - 5.57 | 7.70 | 6.60 - 9.96 | 1.01 | 0.93 - 1.09 |
| 12-19 | mU     | DE      | GerES V         | 2015 - 2017   | F,M | 918 |     | 0.05 | 4.25          | 0.70 | 0.63 - 0.77 | 1.47 | 1.34 - 1.68 | 3.60 | 3.02 - 4.25 | 6.37 | 5.14 - 7.59 | 0.69 | 0.63 - 0.75 |
| 20-39 | 24hU   | DE      | ESB 2009        | 2009          | F,M | 60  |     | 0.05 | 80.0          |      |             |      |             | 0.22 | 0.11 - 2.83 | 0.72 |             |      |             |
| 20-39 | 24hU   | DE      | ESB 2010        | 2010          | F,M | 60  |     | 0.05 | 45.0          | 0.06 |             | 0.19 | 0.11 - 0.43 | 0.51 | 0.37 - 2.09 | 1.45 |             | 0.06 | 0.04 - 0.10 |
| 20-39 | 24hU   | DE      | ESB 2011        | 2011          | F,M | 60  |     | 0.05 | 20.0          | 0.17 | 0.11 - 0.33 | 0.52 | 0.33 - 1.43 | 2.74 | 0.75 - 20.9 | 4.98 |             | 0.21 | 0.13 - 0.33 |
| 20-39 | 24hU   | DE      | ESB 2012        | 2012          | F,M | 56  |     | 0.05 | 14.3          | 0.27 | 0.20 - 0.34 | 0.49 | 0.34 - 1.13 | 1.22 | 0.76 - 3.01 | 1.55 |             | 0.27 | 0.18 - 0.40 |
| 20-39 | 24hU   | DE      | ESB 2013        | 2013          | F,M | 60  |     | 0.05 | 0.00          | 0.21 | 0.18 - 0.30 | 0.38 | 0.31 - 0.64 | 0.70 | 0.57 - 3.34 | 2.17 |             | 0.25 | 0.19 - 0.33 |
| 20-39 | 24hU   | DE      | ESB 2015        | 2015          | F,M | 60  |     | 0.05 | 3.33          | 0.28 | 0.23 - 0.37 | 0.57 | 0.40 - 0.84 | 1.19 | 0.74 - 6.88 | 1.81 |             | 0.31 | 0.23 - 0.42 |
| 20-39 | 24hU   | DE      | ESB 2017        | 2017          | F,M | 60  |     | 0.05 | 5.00          | 0.30 | 0.25 - 0.41 | 0.65 | 0.41 - 1.16 | 1.31 | 0.93 - 5.10 | 1.88 |             | 0.34 | 0.25 - 0.45 |

Notes. Matrix: mU - first morning urine, sU - spot urine, 24hU - 24-hours urine; country: AT - Austria, BE - Belgium, CZ - Czech Republic, DE - Germany, DK - Denmark, ES - Spain, HU - Hungary, IL - Israel, LU - Luxemburg, NO - Norway, PL - Poland, SE - Sweden, SI - Slovenia, SK - Slovakia; sex: F - female, M - male; n - sample size; LOD - limit of detection; LOQ - limit of quantification; % below limit - percentage of values below limit of detection/quantification, whichever was applied in the data collection; P50, P75, P90, P95 - 50th, 75th, 90th, 95th percentile; 95% CI - 95 % confidence interval; GM - geometric mean; NA - Not available.

Data only displayed if n was at least 50; percentiles missing when below LOD/LOQ; CIs of the observed percentiles missing when they fall outside the observed range; GM was imputed (fixed imputation) based on a log-normal distribution when at least 50 % of values were above LOD/LOQ.



**Table S23: DEHTP metabolite 2cx-MMHTP (1-mono-(2-carboxyl-methyl-hexyl) benzene-1,4-dicarboxylate) in microg/L**

| Age   | Matrix | Country | Data collection | Sampling year | Sex | N   | LOD | LOQ  | % below limit | P50 | P50_95% CI | P75  | P75_95% CI  | P90  | P90_95% CI  | P95  | P95_95% CI  | GM | GM_95% CI |
|-------|--------|---------|-----------------|---------------|-----|-----|-----|------|---------------|-----|------------|------|-------------|------|-------------|------|-------------|----|-----------|
| 3-5   | mU     | DE      | GerES V         | 2015 - 2017   | F,M | 333 |     | 0.40 | 61.3          |     |            | 0.58 | 0.51 - 0.70 | 1.22 | 0.98 - 1.58 | 1.73 | 1.53 - 2.83 |    |           |
| 6-11  | mU     | DE      | GerES V         | 2015 - 2017   | F,M | 890 |     | 0.40 | 77.1          |     |            |      |             | 0.70 | 0.61 - 0.79 | 1.03 | 0.91 - 1.40 |    |           |
| 12-19 | mU     | DE      | GerES V         | 2015 - 2017   | F,M | 895 |     | 0.40 | 90.8          |     |            |      |             |      |             | 0.58 | 0.51 - 0.81 |    |           |

Notes. Matrix: mU - first morning urine, sU - spot urine, 24hU - 24-hours urine; country: AT - Austria, BE - Belgium, CZ - Czech Republic, DE - Germany, DK - Denmark, ES - Spain, HU - Hungary, IL - Israel, LU - Luxembourg, NO - Norway, PL - Poland, SE - Sweden, SI - Slovenia, SK - Slovakia; sex: F - female, M - male; n - sample size; LOD - limit of detection; LOQ - limit of quantification; % below limit - percentage of values below limit of detection/quantification, whichever was applied in the data collection; P50, P75, P90, P95 - 50th, 75th, 90th, 95th percentile; 95% CI - 95 % confidence interval; GM - geometric mean; NA - Not available.

Data only displayed if n was at least 50; percentiles missing when below LOD/LOQ; CIs of the observed percentiles missing when they fall outside the observed range; GM was imputed (fixed imputation) based on a log-normal distribution when at least 50 % of values were above LOD/LOQ.

**Table S24: DEHTP metabolite 5cx-MEPTP (1-mono-(2-ethyl-5-carboxyl-pentyl) benzene-1,4-dicarboxylate) in microg/L**

| Age   | Matrix | Country | Data collection | Sampling year | Sex | N   | LOD | LOQ  | % below limit | P50  | P50_95% CI  | P75  | P75_95% CI  | P90  | P90_95% CI  | P95  | P95_95% CI  | GM   | GM_95% CI   |
|-------|--------|---------|-----------------|---------------|-----|-----|-----|------|---------------|------|-------------|------|-------------|------|-------------|------|-------------|------|-------------|
| 3-5   | mU     | DE      | GerES V         | 2015 - 2017   | F,M | 333 |     | 0.20 | 0.00          | 13.5 | 11.9 - 15.7 | 28.2 | 23.1 - 35.2 | 53.3 | 46.9 - 73.6 | 87.1 | 71.4 - 141  | 14.5 | 12.9 - 16.3 |
| 6-11  | mU     | DE      | GerES V         | 2015 - 2017   | F,M | 890 |     | 0.20 | 0.00          | 8.51 | 8.00 - 9.30 | 17.5 | 16.0 - 18.8 | 33.0 | 28.8 - 39.0 | 53.0 | 46.9 - 65.9 | 8.95 | 8.33 - 9.61 |
| 12-19 | mU     | DE      | GerES V         | 2015 - 2017   | F,M | 895 |     | 0.20 | 0.22          | 4.85 | 4.49 - 5.18 | 9.44 | 8.41 - 10.3 | 18.5 | 15.8 - 21.4 | 30.3 | 25.2 - 44.0 | 5.11 | 4.75 - 5.49 |

Notes. Matrix: mU - first morning urine, sU - spot urine, 24hU - 24-hours urine; country: AT - Austria, BE - Belgium, CZ - Czech Republic, DE - Germany, DK - Denmark, ES - Spain, HU - Hungary, IL - Israel, LU - Luxembourg, NO - Norway, PL - Poland, SE - Sweden, SI - Slovenia, SK - Slovakia; sex: F - female, M - male; n - sample size; LOD - limit of detection; LOQ - limit of quantification; % below limit - percentage of values below limit of detection/quantification, whichever was applied in the data collection; P50, P75, P90, P95 - 50th, 75th, 90th, 95th percentile; 95% CI - 95 % confidence interval; GM - geometric mean; NA - Not available.

Data only displayed if n was at least 50; percentiles missing when below LOD/LOQ; CIs of the observed percentiles missing when they fall outside the observed range; GM was imputed (fixed imputation) based on a log-normal distribution when at least 50 % of values were above LOD/LOQ.

**Table S25: DEHTP metabolite 5OH-MEHTP (1-mono-(2-ethyl-5-hydroxy-hexyl) benzene-1,4-dicarboxylate) in microg/L**

| Age   | Matrix | Country | Data collection | Sampling year | Sex | N   | LOD | LOQ  | % below limit | P50  | P50_95% CI  | P75  | P75_95% CI  | P90  | P90_95% CI  | P95  | P95_95% CI  | GM   | GM_95% CI   |
|-------|--------|---------|-----------------|---------------|-----|-----|-----|------|---------------|------|-------------|------|-------------|------|-------------|------|-------------|------|-------------|
| 3-5   | mU     | DE      | GerES V         | 2015 - 2017   | F,M | 333 |     | 0.30 | 19.5          | 0.97 | 0.78 - 1.18 | 2.25 | 1.94 - 2.69 | 4.57 | 3.65 - 5.90 | 8.36 | 5.82 - 12.3 | 0.94 | 0.82 - 1.08 |
| 6-11  | mU     | DE      | GerES V         | 2015 - 2017   | F,M | 890 |     | 0.30 | 28.0          | 0.61 | 0.54 - 0.67 | 1.42 | 1.29 - 1.58 | 2.91 | 2.65 - 3.46 | 4.40 | 3.94 - 6.30 | 0.62 | 0.57 - 0.67 |
| 12-19 | mU     | DE      | GerES V         | 2015 - 2017   | F,M | 895 |     | 0.30 | 44.4          | 0.34 | 0.31 - 0.37 | 0.76 | 0.70 - 0.89 | 1.83 | 1.68 - 2.07 | 2.79 | 2.40 - 4.07 | 0.35 | 0.32 - 0.38 |

Notes. Matrix: mU - first morning urine, sU - spot urine, 24hU - 24-hours urine; country: AT - Austria, BE - Belgium, CZ - Czech Republic, DE - Germany, DK - Denmark, ES - Spain, HU - Hungary, IL - Israel, LU - Luxembourg, NO - Norway, PL - Poland, SE - Sweden, SI - Slovenia, SK - Slovakia; sex: F - female, M - male; n - sample size; LOD - limit of detection; LOQ - limit of quantification; % below limit - percentage of values below limit of detection/quantification, whichever was applied in the data collection; P50, P75, P90, P95 - 50th, 75th, 90th, 95th percentile; 95% CI - 95 % confidence interval; GM - geometric mean; NA - Not available.

Data only displayed if n was at least 50; percentiles missing when below LOD/LOQ; CIs of the observed percentiles missing when they fall outside the observed range; GM was imputed (fixed imputation) based on a log-normal distribution when at least 50 % of values were above LOD/LOQ.

**Table S26: DEHTP metabolite 5oxo-MEHTP (1-mono-(2-ethyl-5-oxo-hexyl) benzene-1,4-dicarboxylate) in microg/L**

| Age   | Matrix | Country | Data collection | Sampling year | Sex | N   | LOD | LOQ  | % below limit | P50  | P50_95% CI  | P75  | P75_95% CI  | P90  | P90_95% CI  | P95  | P95_95% CI  | GM   | GM_95% CI   |
|-------|--------|---------|-----------------|---------------|-----|-----|-----|------|---------------|------|-------------|------|-------------|------|-------------|------|-------------|------|-------------|
| 3-5   | mU     | DE      | GerES V         | 2015 - 2017   | F,M | 333 |     | 0.20 | 9.31          | 1.01 | 0.80 - 1.21 | 2.13 | 1.91 - 2.42 | 4.21 | 3.24 - 5.81 | 7.26 | 5.42 - 11.5 | 0.97 | 0.86 - 1.11 |
| 6-11  | mU     | DE      | GerES V         | 2015 - 2017   | F,M | 890 |     | 0.20 | 16.6          | 0.66 | 0.61 - 0.72 | 1.39 | 1.25 - 1.53 | 2.74 | 2.36 - 3.14 | 4.08 | 3.53 - 5.26 | 0.64 | 0.59 - 0.69 |
| 12-19 | mU     | DE      | GerES V         | 2015 - 2017   | F,M | 895 |     | 0.20 | 30.3          | 0.34 | 0.32 - 0.37 | 0.80 | 0.71 - 0.89 | 1.58 | 1.38 - 1.79 | 2.44 | 2.09 - 3.75 | 0.36 | 0.34 - 0.39 |

Notes. Matrix: mU - first morning urine, sU - spot urine, 24hU - 24-hours urine; country: AT - Austria, BE - Belgium, CZ - Czech Republic, DE - Germany, DK - Denmark, ES - Spain, HU - Hungary, IL - Israel, LU - Luxembourg, NO - Norway, PL - Poland, SE - Sweden, SI - Slovenia, SK - Slovakia; sex: F - female, M - male; n - sample size; LOD - limit of detection; LOQ - limit of quantification; % below limit - percentage of values below limit of detection/quantification, whichever was applied in the data collection; P50, P75, P90, P95 - 50th, 75th, 90th, 95th percentile; 95% CI - 95 % confidence interval; GM - geometric mean; NA - Not available.

Data only displayed if n was at least 50; percentiles missing when below LOD/LOQ; CIs of the observed percentiles missing when they fall outside the observed range; GM was imputed (fixed imputation) based on a log-normal distribution when at least 50 % of values were above LOD/LOQ.

## BBzP metabolite MBzP (Mono-benzyl phthalate)

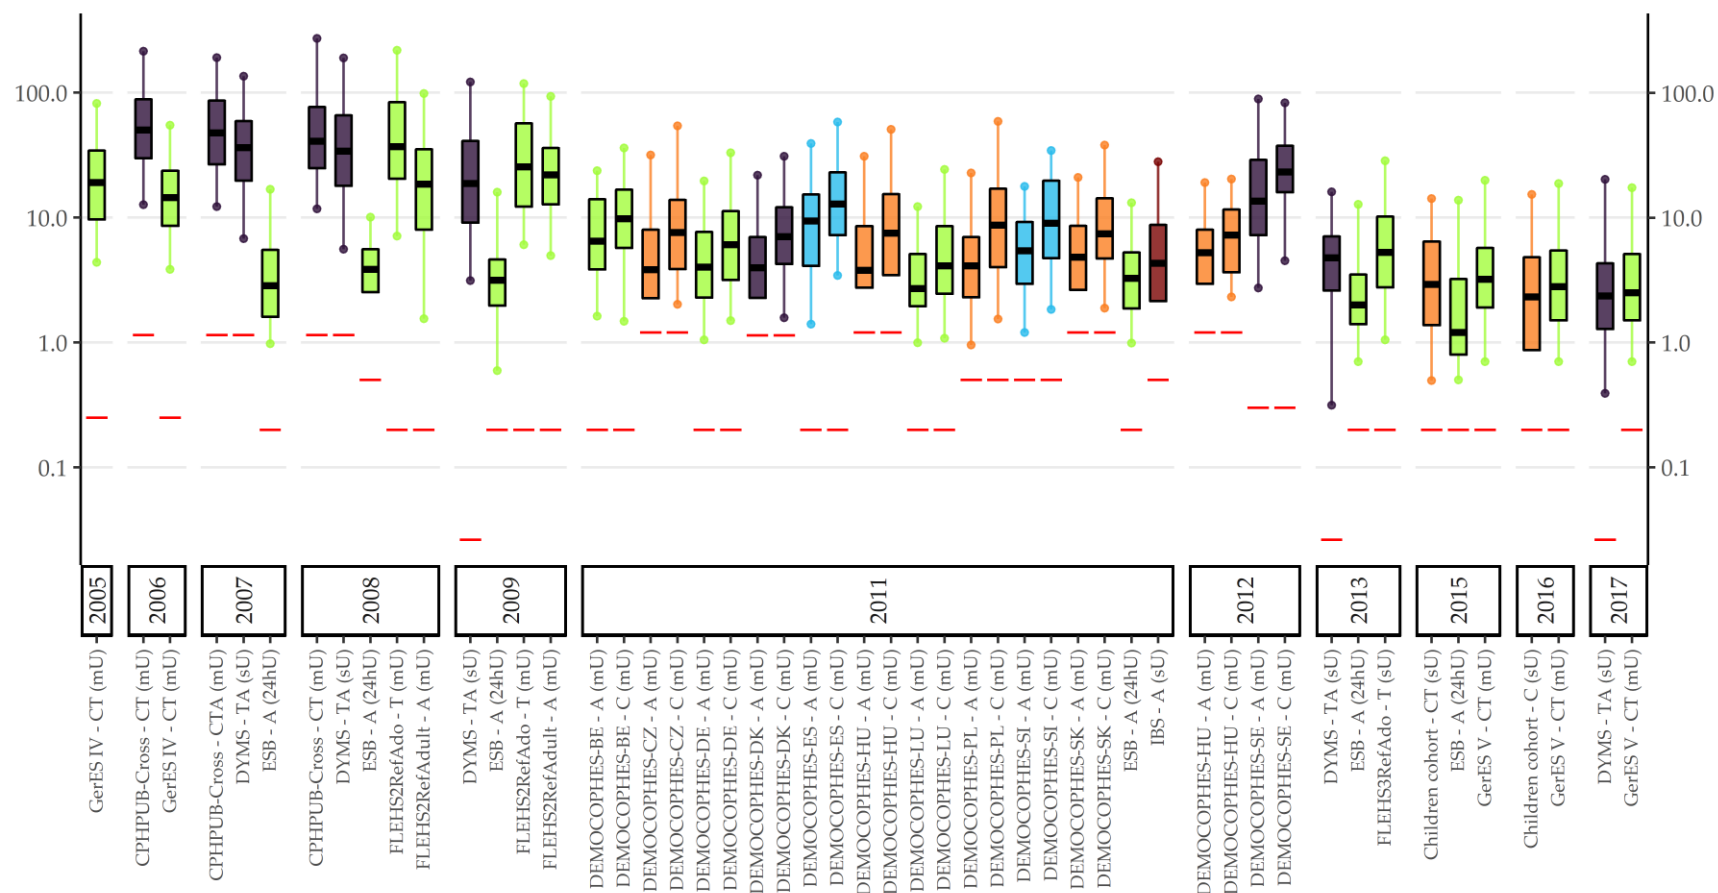

Figure S1. BBzP metabolite MBzP (Mono-benzyl phthalate) concentration in  $\mu\text{g/L}$  stratified by sampling year in boxplots.

The box is based on P25, P50, and P75, and the whiskers are based on P5 and P95. Within sampling years plots are sorted by country. Colors of the boxplots refer to the data collection's region (North = violet, South = blue, West = green, East = orange, Israel = dark red). Red lines denote LOQ/LOD for the respective study. Since percentiles are only available and displayed when they are above LOQ/LOD the lower side of boxplots might be truncated. The age categories are shown in capital letters: children of the age groups 3-5 and 6-11 (C), adolescents between 12 and 19 years (T) and adults from the age groups 20-39, 40-59 and 60 years and older (A). The sampling method is indicated in brackets: first morning urine void (mU), spot urine (sU) and 24-hours urine (24hU).

## BBzP metabolite MBzP (Mono-benzyl phthalate)

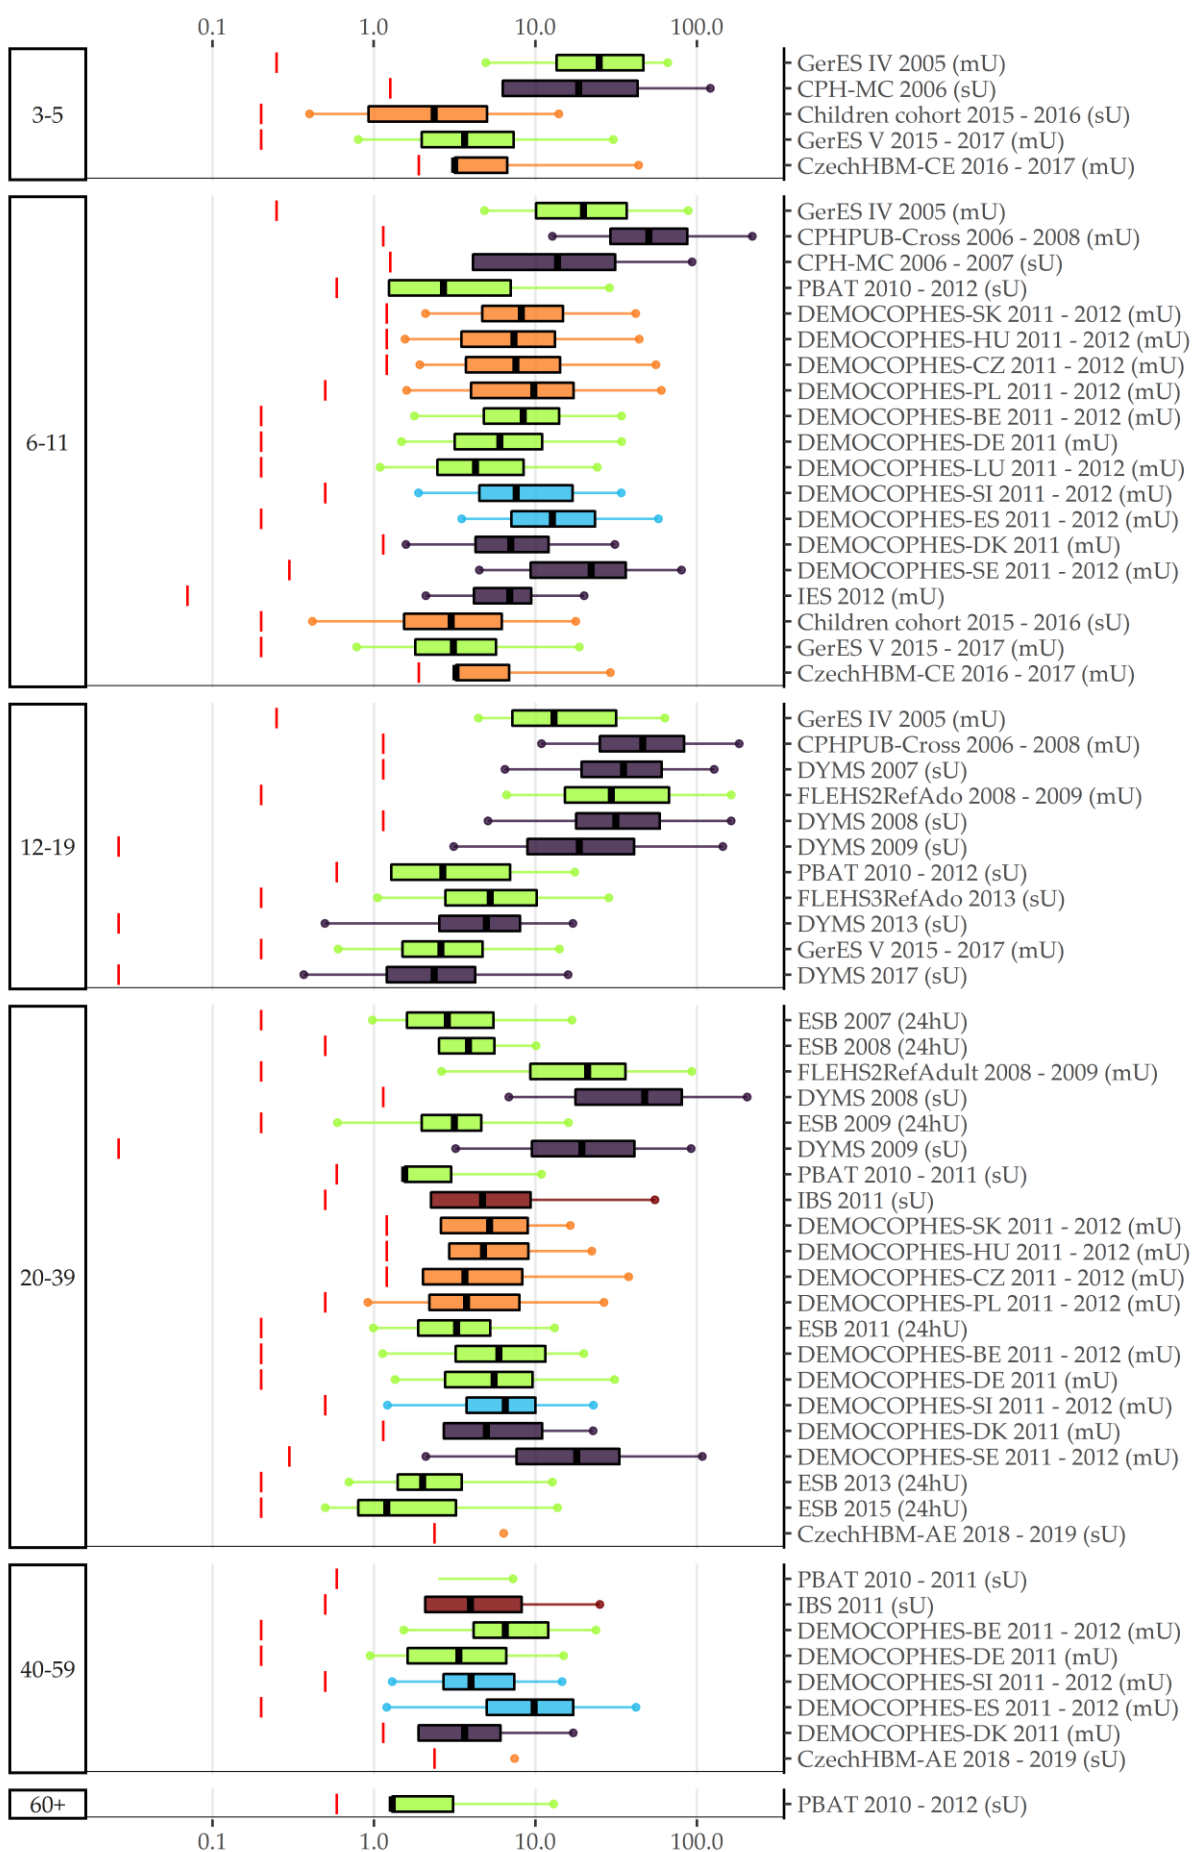

Figure S2. BBzP metabolite MBzP (Mono-benzyl phthalate) concentration in  $\mu\text{g/L}$  stratified by age groups in boxplots.

The box is based on P25, P50, and P75, and the whiskers are based on P5 and P95. Within age groups plots are chronologically sorted by year of sampling. Colors of the boxplots refer to the data collection's region (North = violet, South = blue, West = green, East = orange, Israel = dark red). Red lines denote LOQ/LOD for the respective study. Since percentiles are only available and displayed when they are above LOQ/LOD the lower side of boxplots might be truncated. The sampling method is indicated in brackets: first morning urine void (mU), spot urine (sU) and 24-hours urine (24hU).

# DEHP metabolite 5OH-MEHP (Mono(2-ethyl-5-hydroxy- hexyl) phthalate)

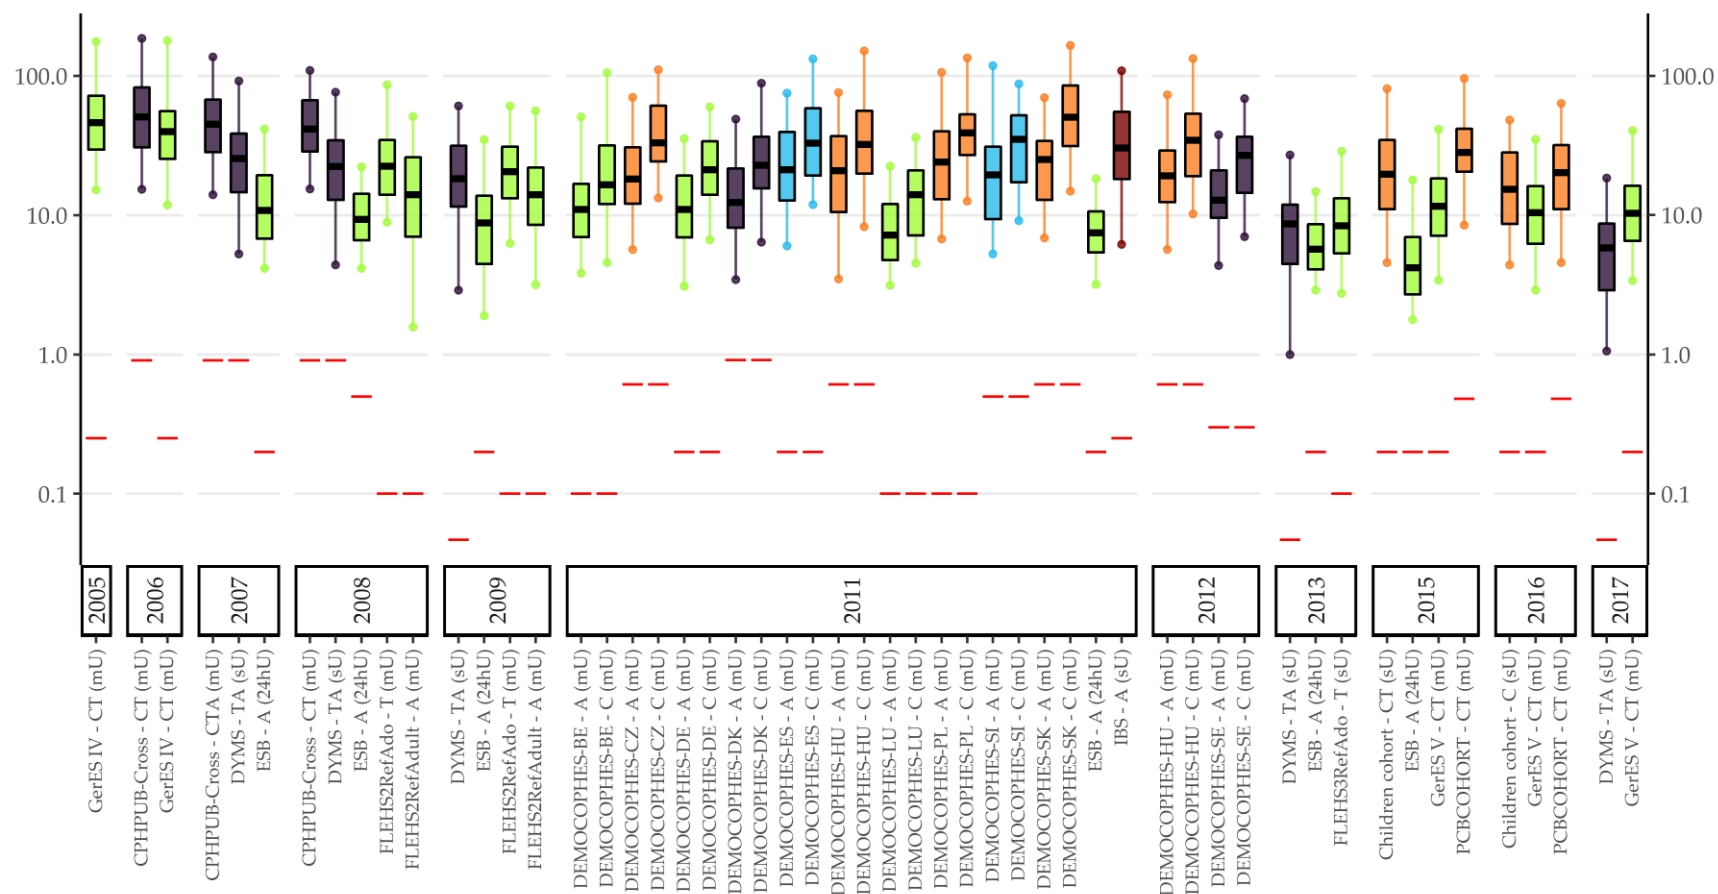

Figure S3. DEHP metabolite 5OH-MEHP (Mono(2-ethyl-5-hydroxy- hexyl) phthalate) concentration in µg/L stratified by sampling year in boxplots.

The box is based on P25, P50, and P75, and the whiskers are based on P5 and P95. Within sampling years plots are sorted by country. Colors of the boxplots refer to the data collection's region (North = violet, South = blue, West = green, East = orange, Israel = dark red). Red lines denote LOQ/LOD for the respective study. Since percentiles are only available and displayed when they are above LOQ/LOD the lower side of boxplots might be truncated. The age categories are shown in capital letters: children of the age groups 3-5 and 6-11 (C), adolescents between 12 and 19 years (T) and adults from the age groups 20-39, 40-59 and 60 years and older (A). The sampling method is indicated in brackets: first morning urine void (mU), spot urine (sU) and 24-hours urine (24hU).

# DEHP metabolite 5OH-MEHP (Mono(2-ethyl-5-hydroxy- hexyl) phthalate)

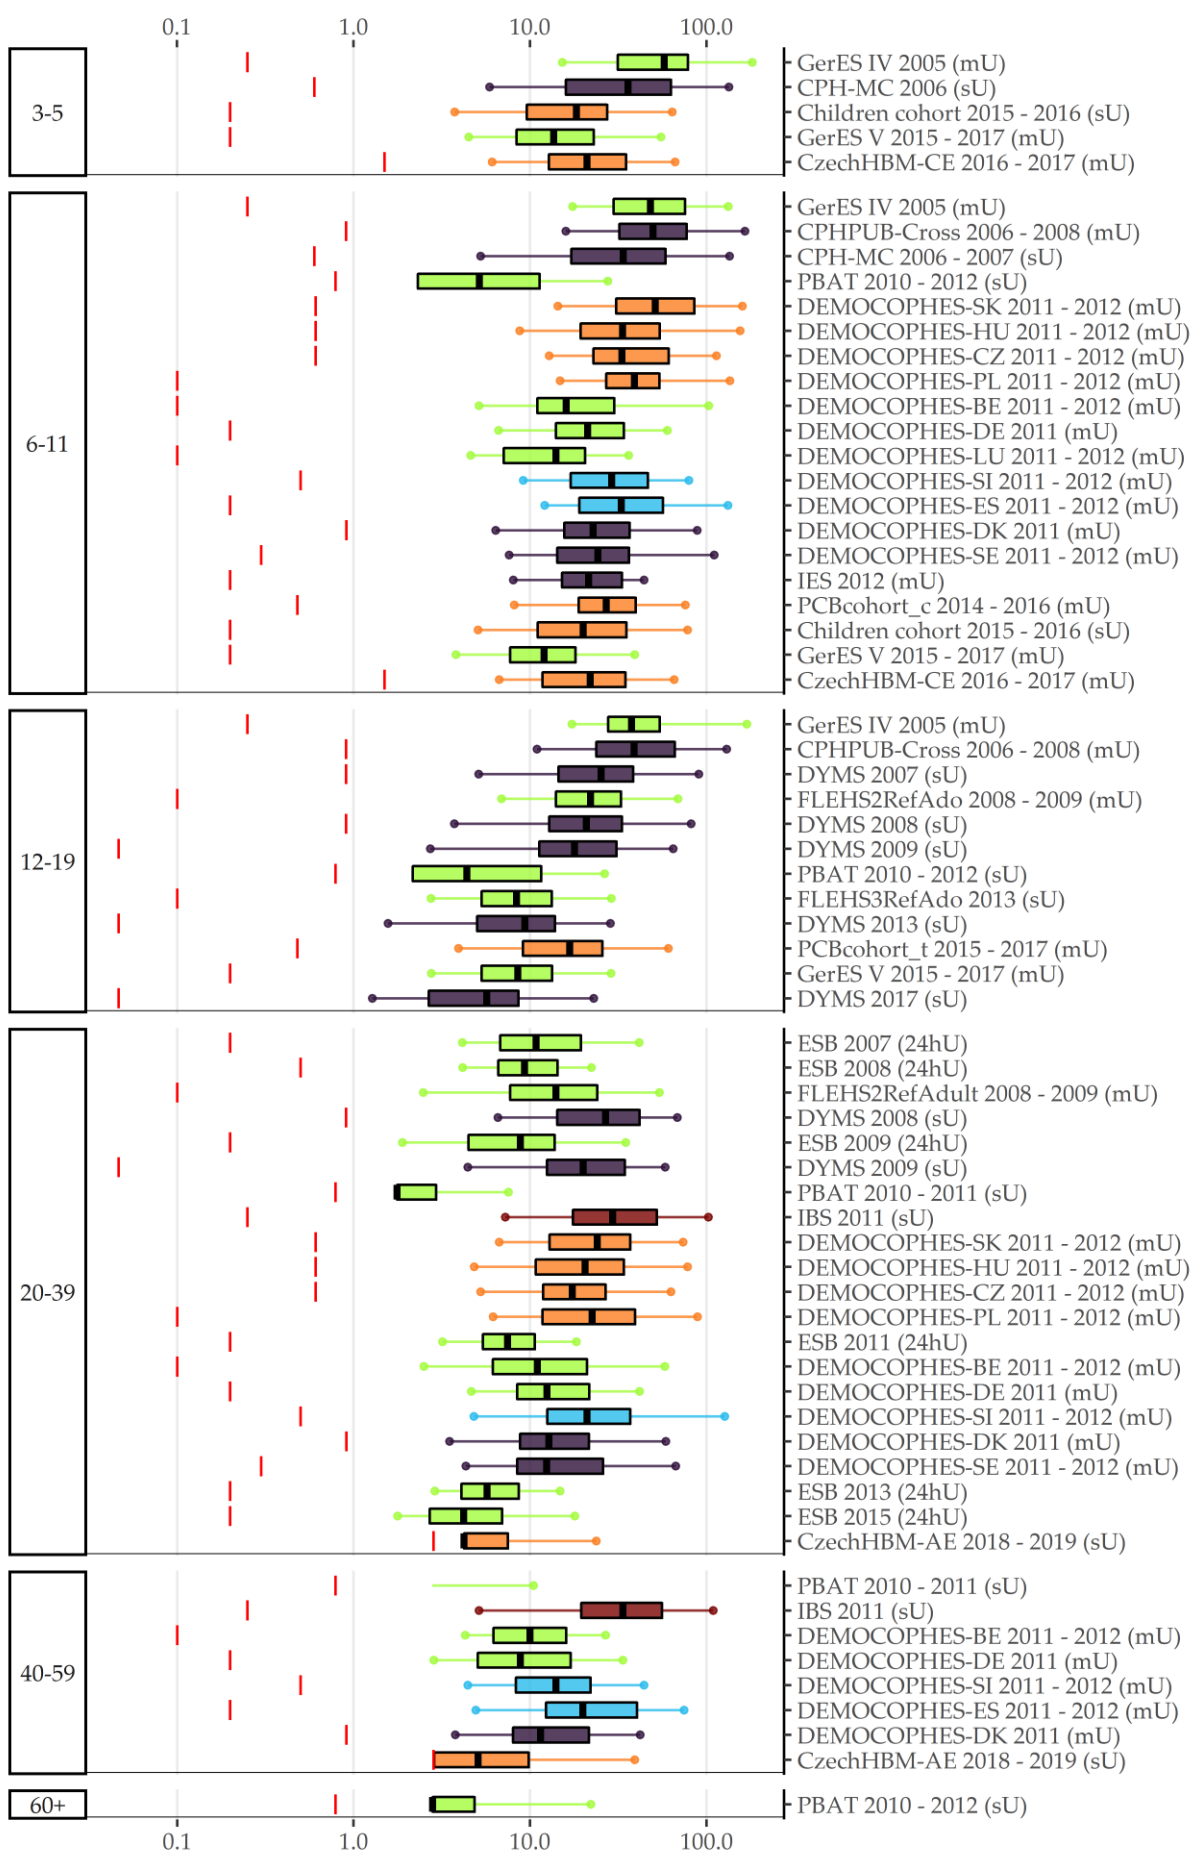

Figure S4. DEHP metabolite 5OH-MEHP (Mono(2-ethyl-5-hydroxy- hexyl) phthalate) concentration in µg/L stratified by age groups in boxplots.

The box is based on P25, P50, and P75, and the whiskers are based on P5 and P95. Within age groups plots are chronologically sorted by year of sampling. Colors of the boxplots refer to the data collection's region (North = violet, South = blue, West = green, East = orange, Israel = dark red). Red lines denote LOQ/LOD for the respective study. Since percentiles are only available and displayed when they are above LOQ/LOD the lower side of boxplots might be truncated. The sampling method is indicated in brackets: first morning urine void (mU), spot urine (sU) and 24-hours urine (24hU).

# DEHP metabolite 5oxo-MEHP (Mono(2-ethyl-5-oxo-hexyl) phthalate)

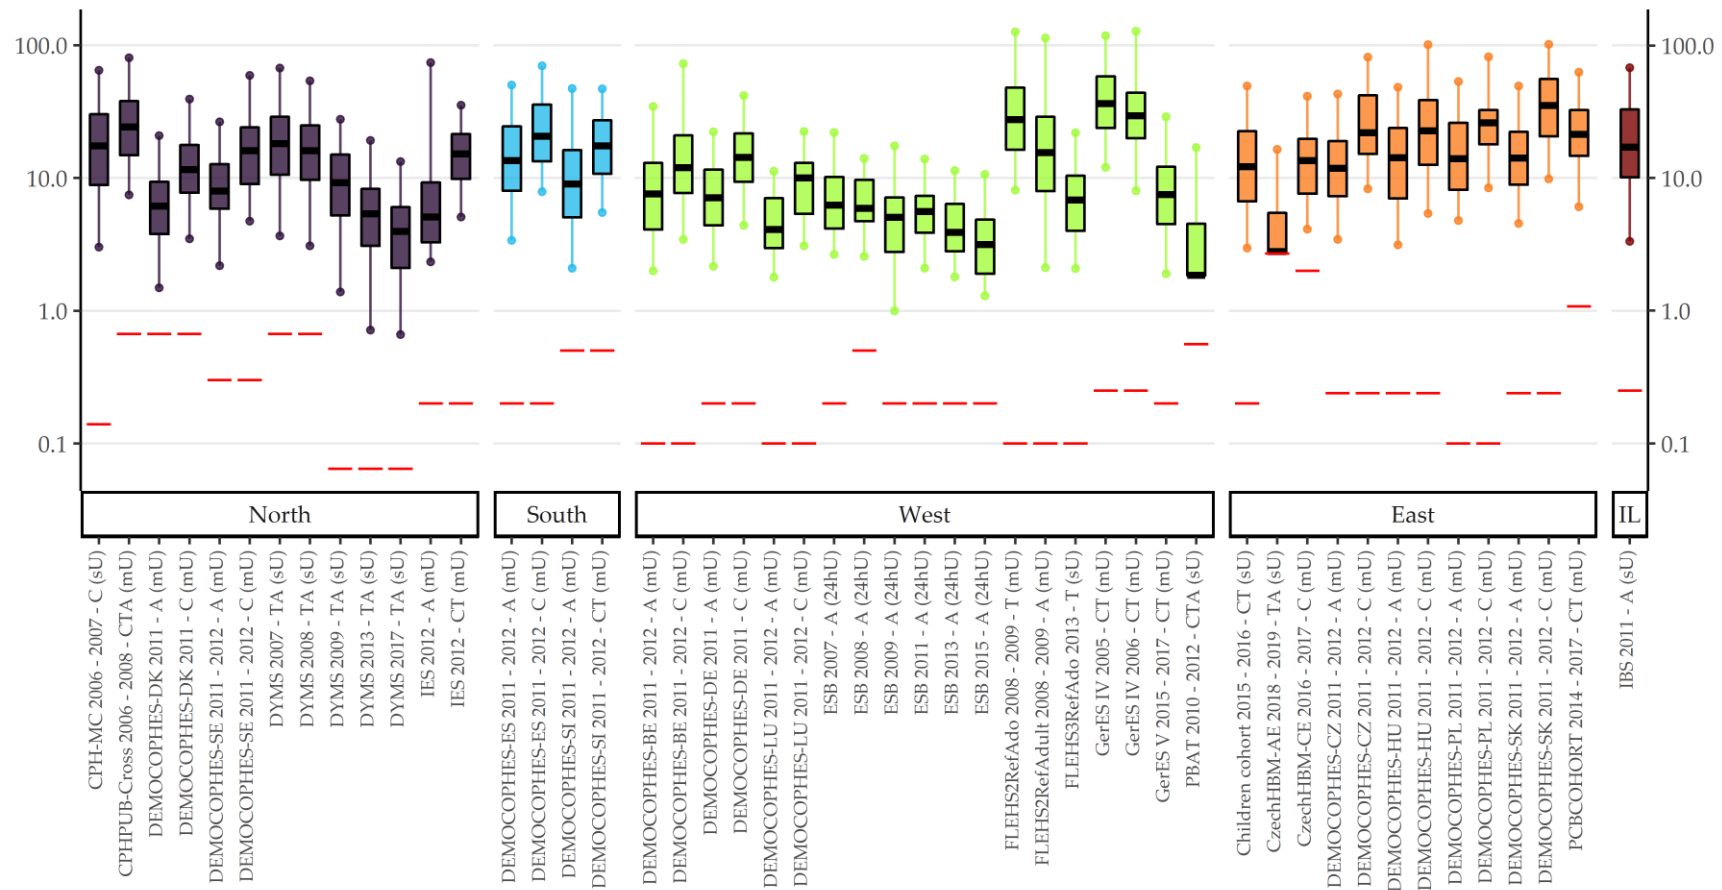

Figure S5. DEHP metabolite 5oxo-MEHP (Mono(2-ethyl-5-oxo-hexyl) phthalate) concentration in µg/L stratified by region in boxplots.

The box is based on P25, P50, and P75, and the whiskers are based on P5 and P95. Within regions plots are sorted by country and year of sampling. Colors of the boxplots refer to the data collection's region (North = violet, South = blue, West = green, East = orange, Israel = dark red). Red lines denote LOQ/LOD for the respective study. Since percentiles are only available and displayed when they are above LOQ/LOD the lower side of boxplots might be truncated. The age categories are shown in capital letters: children of the age groups 3-5 and 6-11 (C), adolescents between 12 and 19 years (T) and adults from the age groups 20-39, 40-59 and 60 years and older (A). The sampling method is indicated in brackets: first morning urine void (mU), spot urine (sU) and 24-hours urine (24hU).

# DEHP metabolite 5oxo-MEHP (Mono(2-ethyl-5-oxo-hexyl) phthalate)

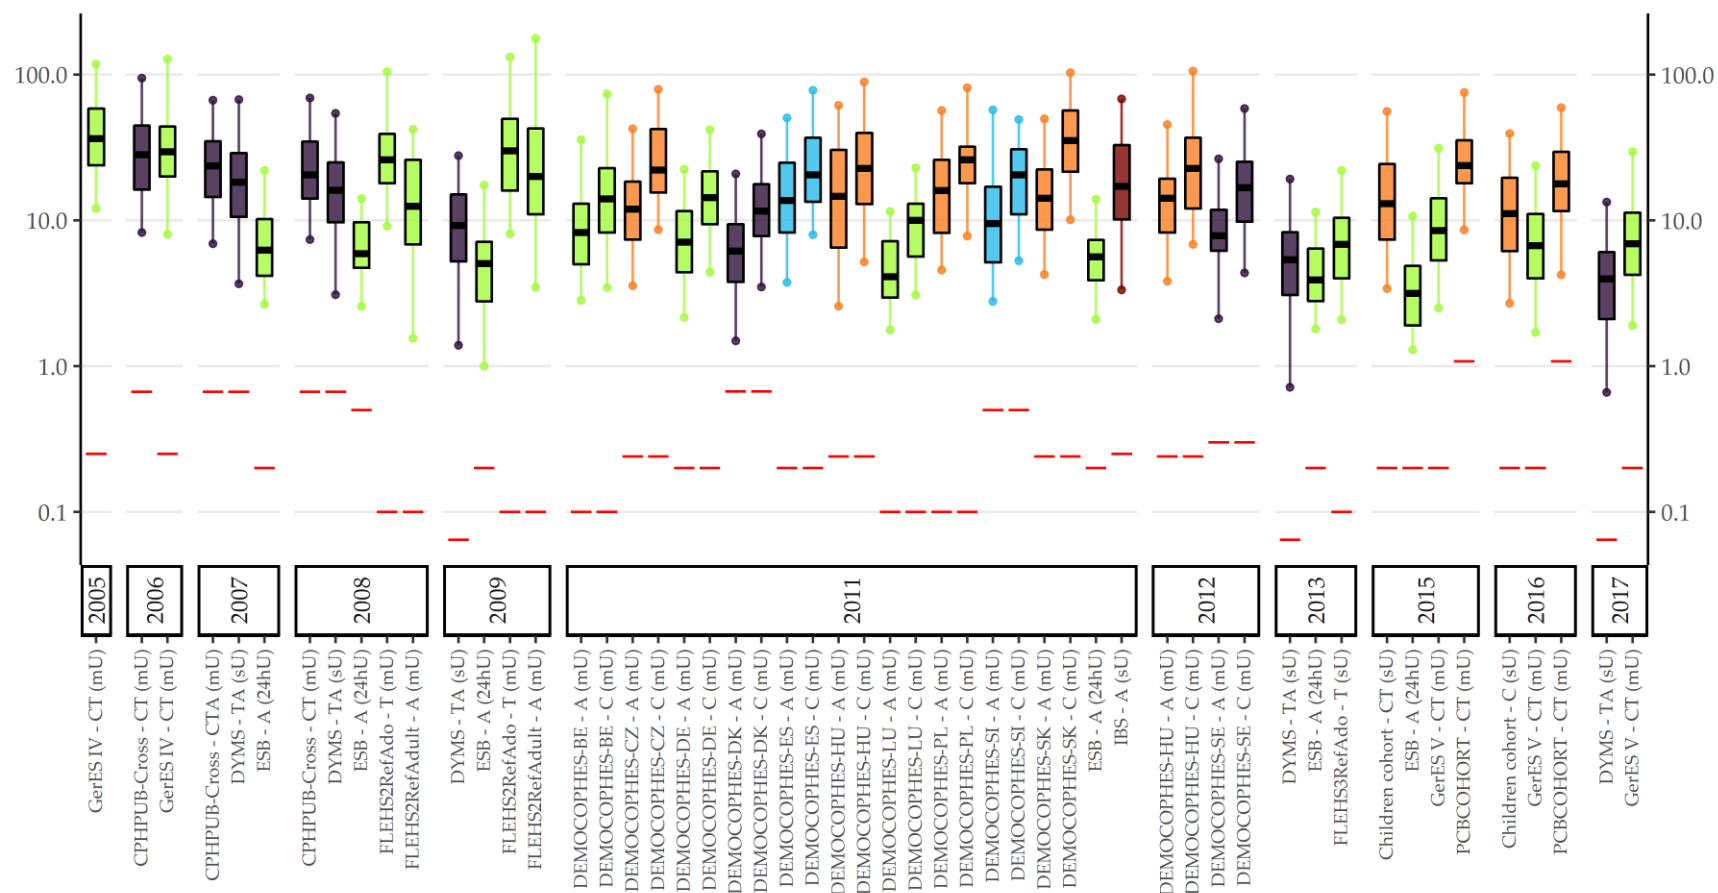

Figure S6. DEHP metabolite 5oxo-MEHP (Mono(2-ethyl-5-oxo-hexyl) phthalate) concentration in µg/L stratified by sampling year in boxplots.

The box is based on P25, P50, and P75, and the whiskers are based on P5 and P95. Within sampling years plots are sorted by country. Colors of the boxplots refer to the data collection's region (North = violet, South = blue, West = green, East = orange, Israel = dark red). Red lines denote LOQ/LOD for the respective study. Since percentiles are only available and displayed when they are above LOQ/LOD the lower side of boxplots might be truncated. The age categories are shown in capital letters: children of the age groups 3-5 and 6-11 (C), adolescents between 12 and 19 years (T) and adults from the age groups 20-39, 40-59 and 60 years and older (A). The sampling method is indicated in brackets: first morning urine void (mU), spot urine (sU) and 24-hours urine (24hU).

# DEHP metabolite 5oxo-MEHP (Mono(2-ethyl-5-oxo-hexyl) phthalate)

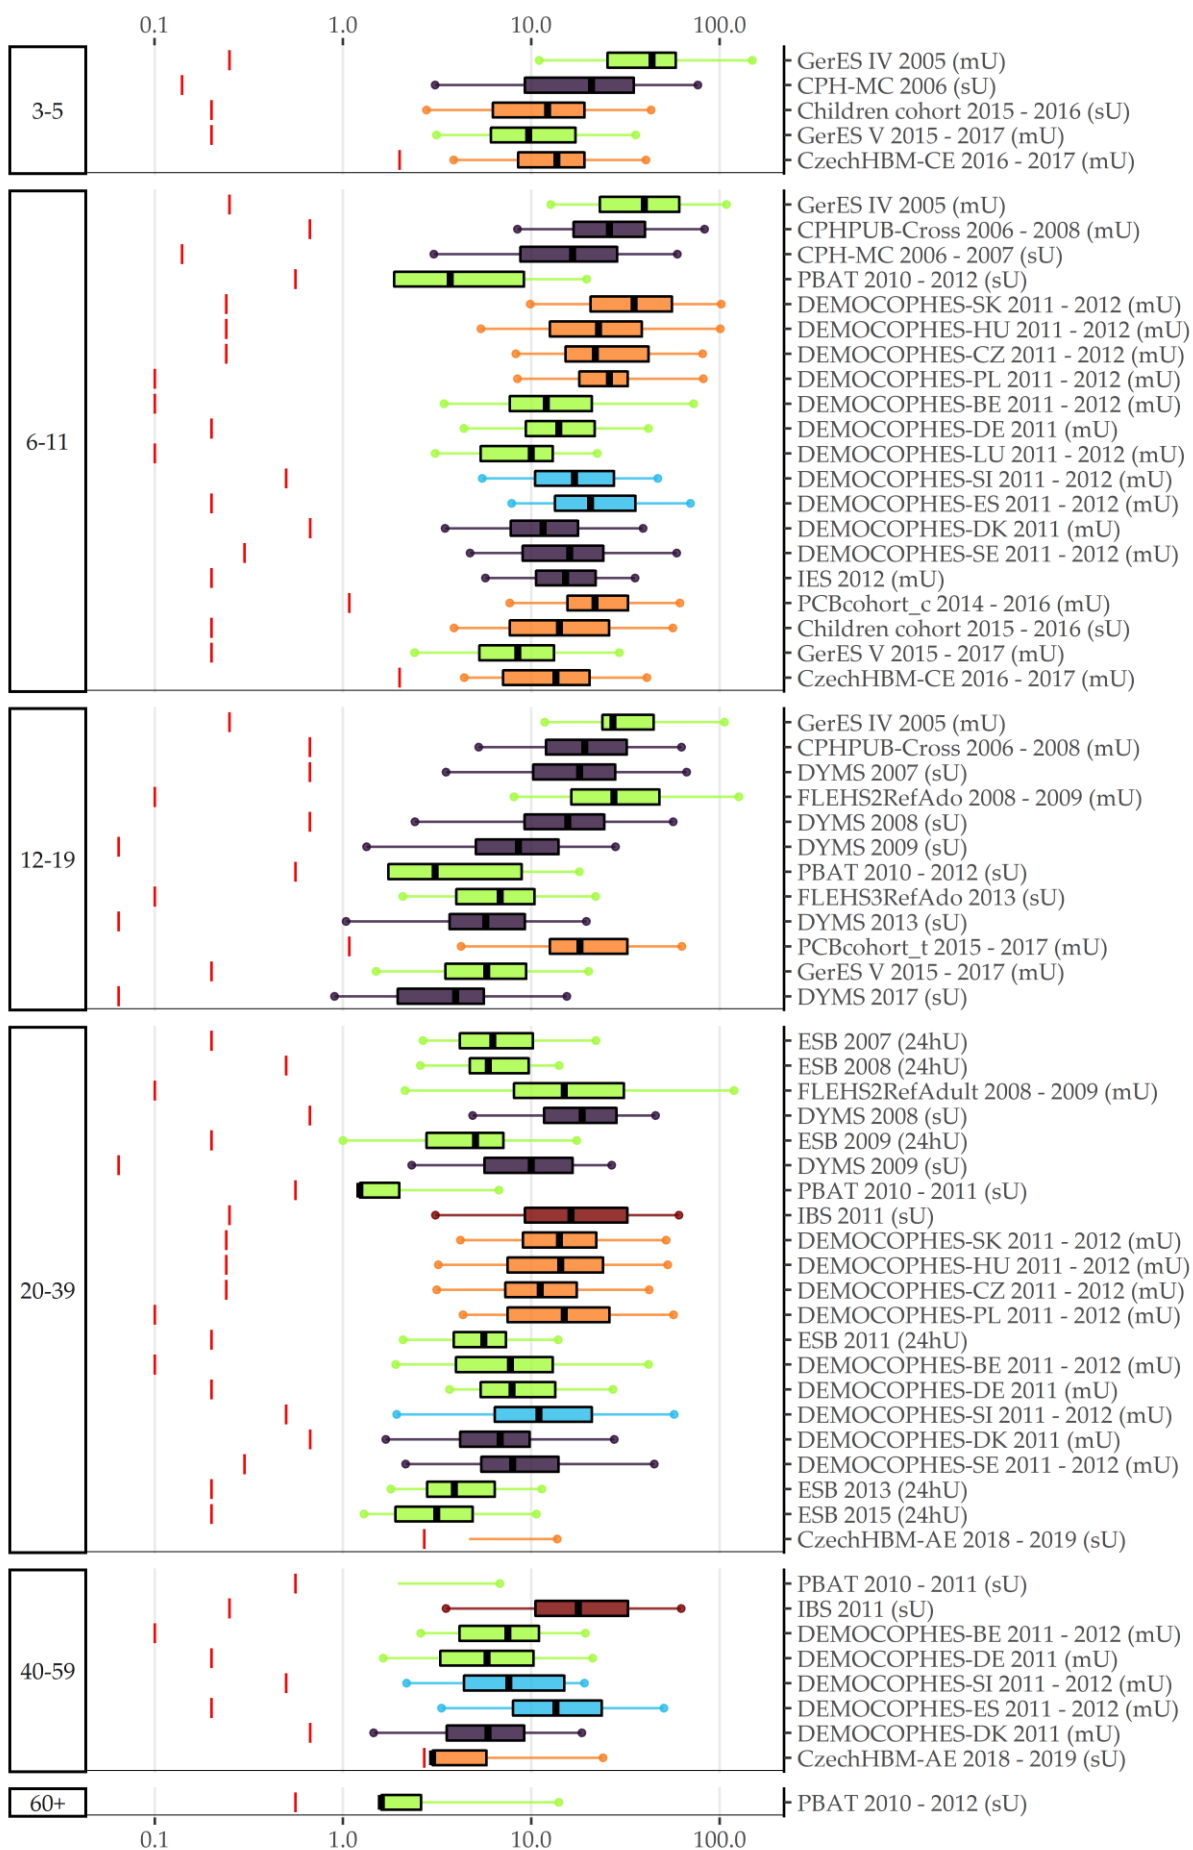

Figure S7. DEHP metabolite 5oxo-MEHP (Mono(2-ethyl-5-oxo-hexyl) phthalate) concentration in µg/L stratified by age groups in boxplots.

The box is based on P25, P50, and P75, and the whiskers are based on P5 and P95. Within age groups plots are chronologically sorted by year of sampling. Colors of the boxplots refer to the data collection's region (North = violet, South = blue, West = green, East = orange, Israel = dark red). Red lines denote LOQ/LOD for the respective study. Since percentiles are only available and displayed when they are above LOQ/LOD the lower side of boxplots might be truncated. The sampling method is indicated in brackets: first morning urine void (mU), spot urine (sU) and 24-hours urine (24hU).

# DEHP metabolite 5cx-MEPP (Mono(2-ethyl-5-carboxy- pentyl) phthalate)

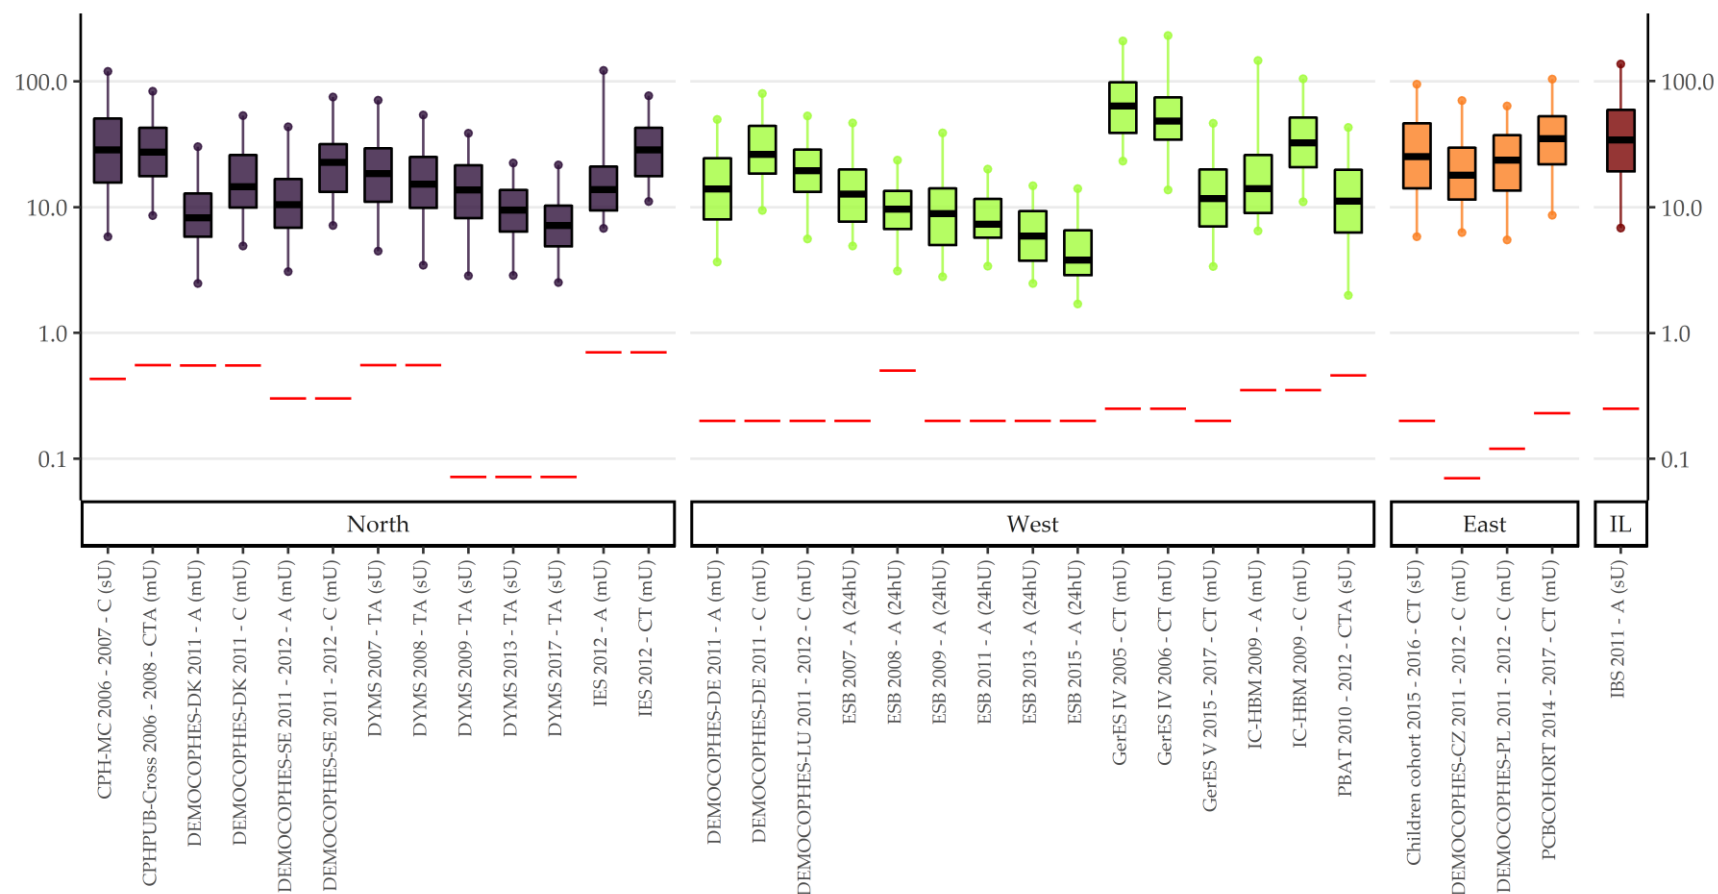

Figure S8. DEHP metabolite 5cx-MEPP (Mono(2-ethyl-5-carboxy- pentyl) phthalate) concentration in µg/L stratified by region in boxplots.

The box is based on P25, P50, and P75, and the whiskers are based on P5 and P95. Within regions plots are sorted by country and year of sampling. Colors of the boxplots refer to the data collection's region (North = violet, South = blue, West = green, East = orange, Israel = dark red). Red lines denote LOQ/LOD for the respective study. Since percentiles are only available and displayed when they are above LOQ/LOD the lower side of boxplots might be truncated. The age categories are shown in capital letters: children of the age groups 3-5 and 6-11 (C), adolescents between 12 and 19 years (T) and adults from the age groups 20-39, 40-59 and 60 years and older (A). The sampling method is indicated in brackets: first morning urine void (mU), spot urine (sU) and 24-hours urine (24hU).

# DEHP metabolite 5cx-MEPP (Mono(2-ethyl-5-carboxy- pentyl) phthalate)

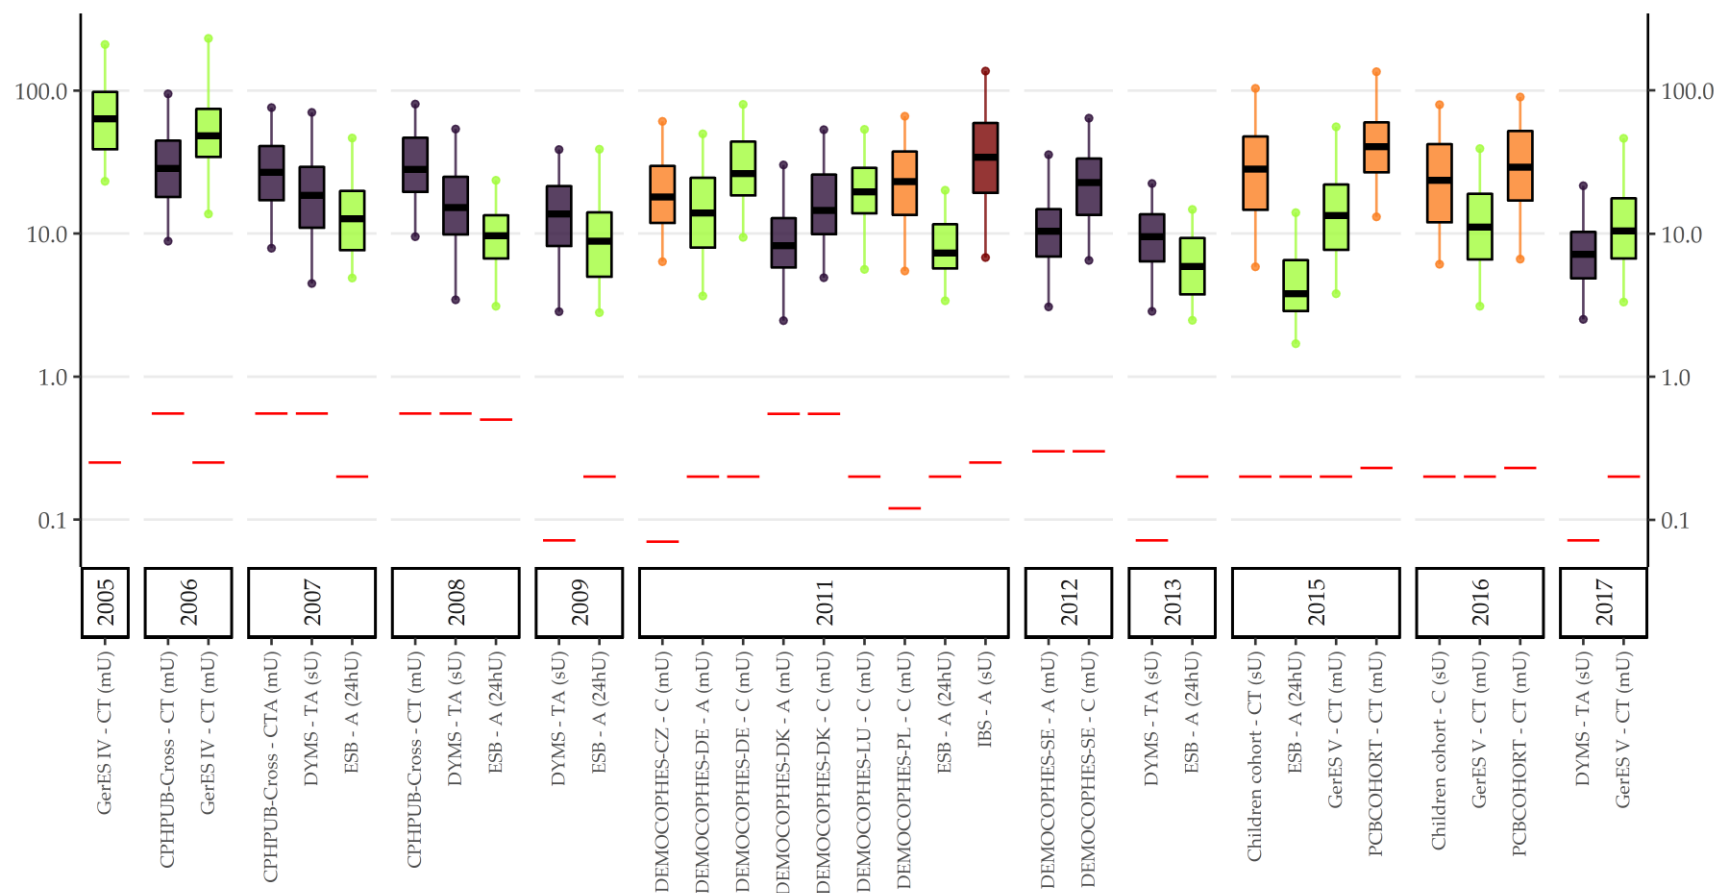

Figure S9. DEHP metabolite 5cx-MEPP (Mono(2-ethyl-5-carboxy- pentyl) phthalate) concentration in µg/L stratified by sampling year in boxplots.

The box is based on P25, P50, and P75, and the whiskers are based on P5 and P95. Within sampling years plots are sorted by country. Colors of the boxplots refer to the data collection's region (North = violet, South = blue, West = green, East = orange, Israel = dark red). Red lines denote LOQ/LOD for the respective study. Since percentiles are only available and displayed when they are above LOQ/LOD the lower side of boxplots might be truncated. The age categories are shown in capital letters: children of the age groups 3-5 and 6-11 (C), adolescents between 12 and 19 years (T) and adults from the age groups 20-39, 40-59 and 60 years and older (A). The sampling method is indicated in brackets: first morning urine void (mU), spot urine (sU) and 24-hours urine (24hU).

# DEHP metabolite 5cx-MEPP (Mono(2-ethyl-5-carboxy- pentyl) phthalate)

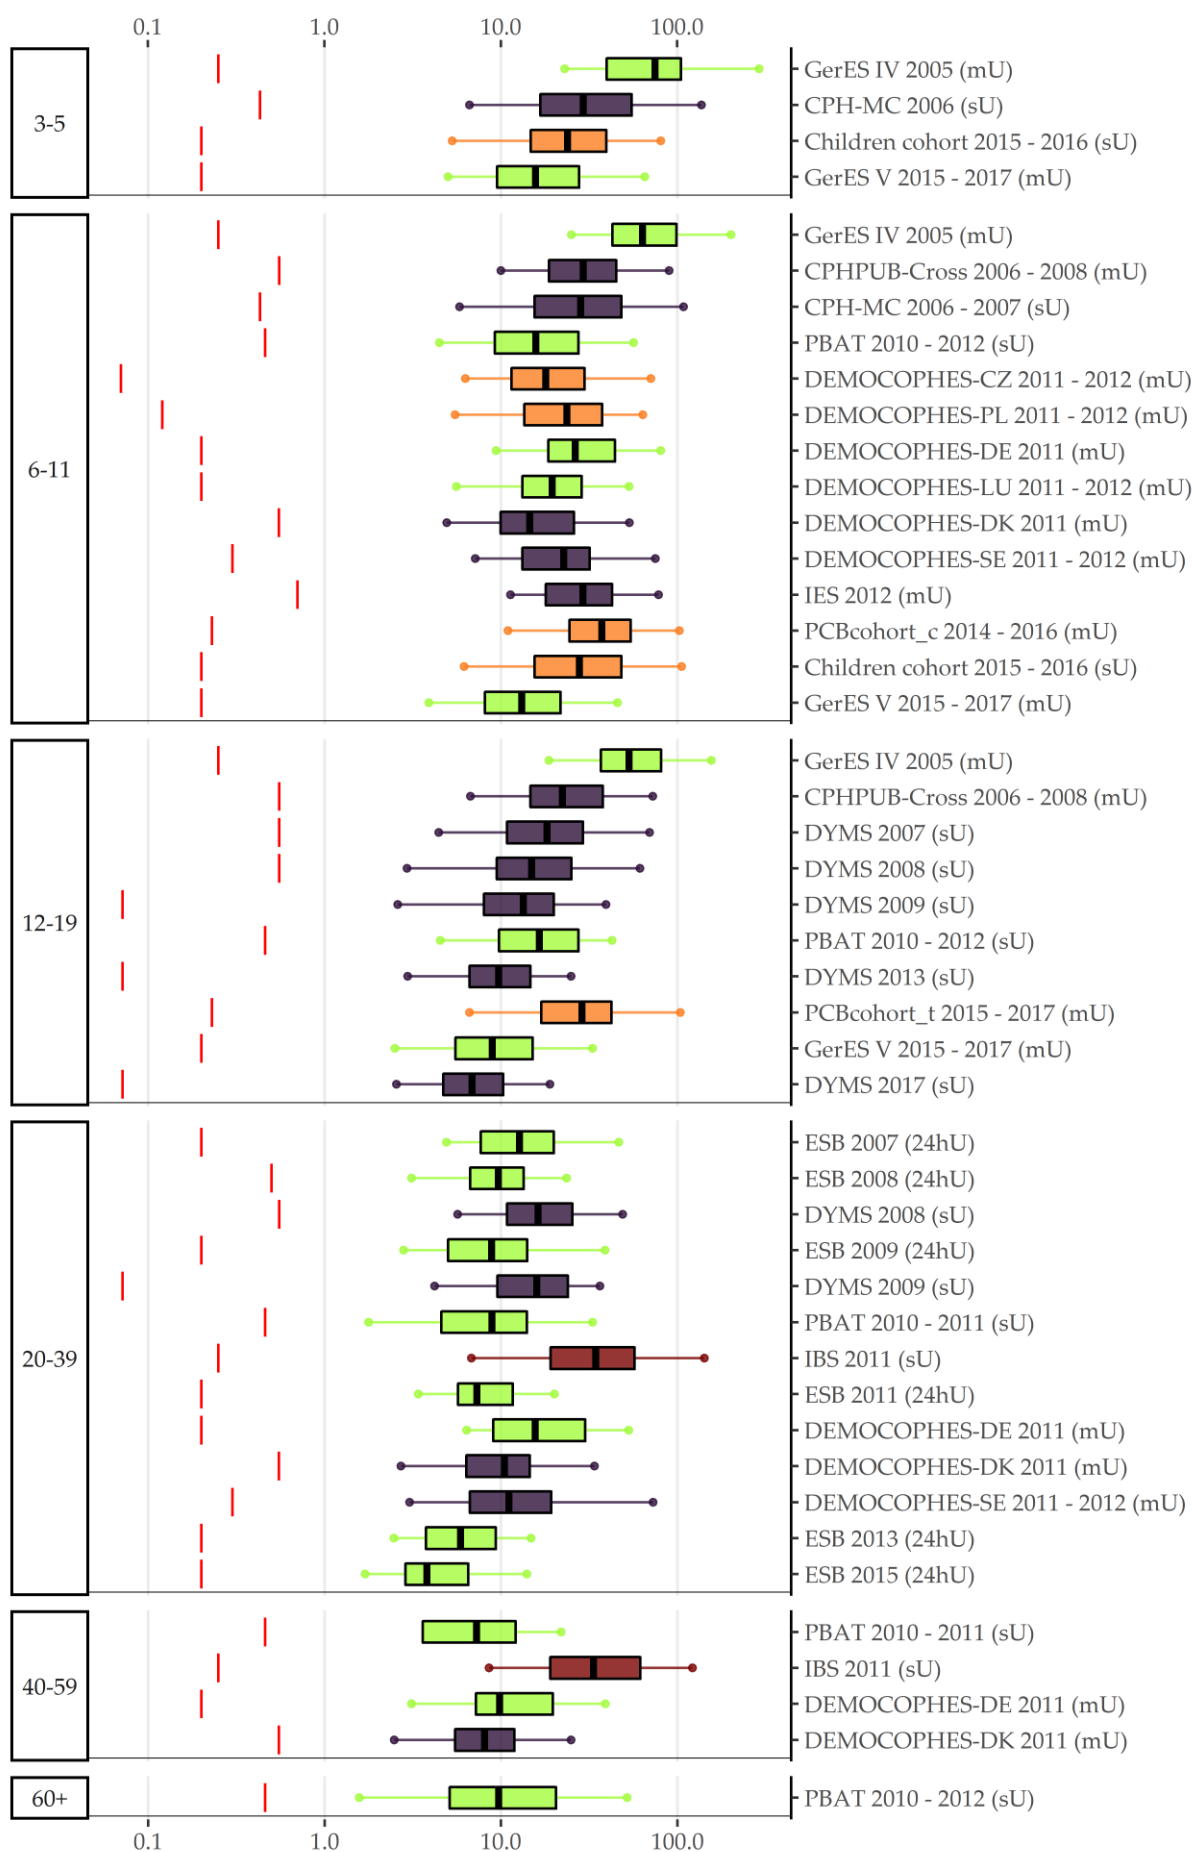

Figure S10. DEHP metabolite 5cx-MEPP (Mono(2-ethyl-5-carboxy- pentyl) phthalate) concentration in µg/L stratified by age groups in boxplots.

The box is based on P25, P50, and P75, and the whiskers are based on P5 and P95. Within age groups plots are chronologically sorted by year of sampling. Colors of the boxplots refer to the data collection's region (North = violet, South = blue, West = green, East = orange, Israel = dark red). Red lines denote LOQ/LOD for the respective study. Since percentiles are only available and displayed when they are above LOQ/LOD the lower side of boxplots might be truncated. The sampling method is indicated in brackets: first morning urine void (mU), spot urine (sU) and 24-hours urine (24hU).

## DEHP metabolite MEHP (Mono(2-ethylhexyl) phthalate)

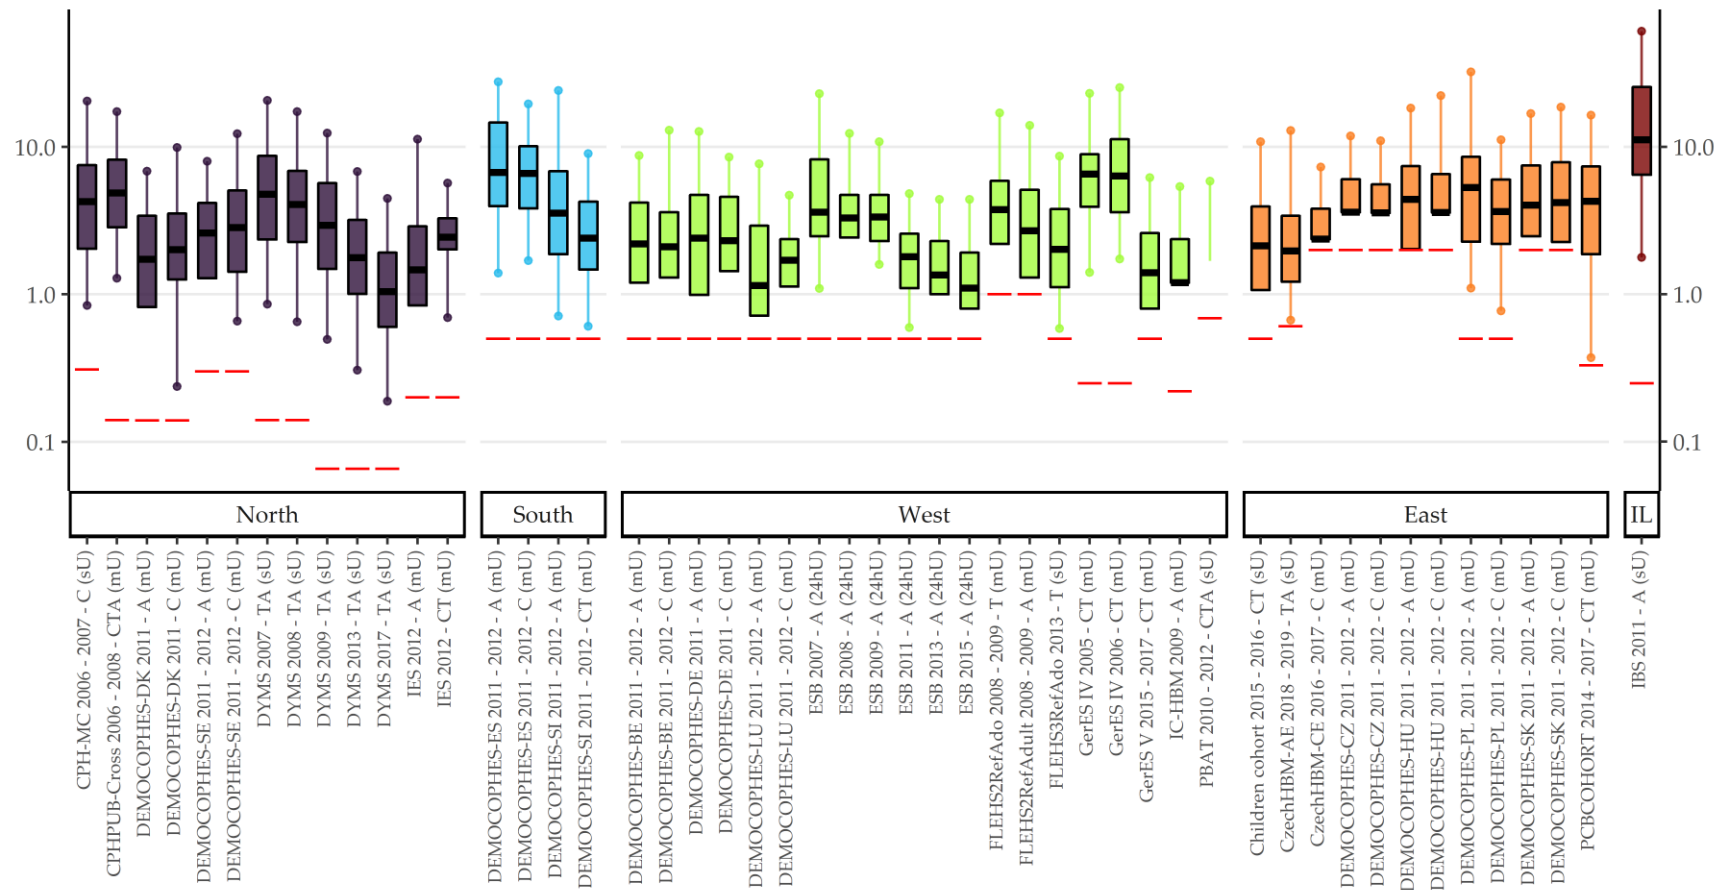

Figure S11. DEHP metabolite MEHP (Mono(2-ethylhexyl) phthalate) concentration in µg/L stratified by region in boxplots.

The box is based on P25, P50, and P75, and the whiskers are based on P5 and P95. Within regions plots are sorted by country and year of sampling. Colors of the boxplots refer to the data collection's region (North = violet, South = blue, West = green, East = orange, Israel = dark red). Red lines denote LOQ/LOD for the respective study. Since percentiles are only available and displayed when they are above LOQ/LOD the lower side of boxplots might be truncated. The age categories are shown in capital letters: children of the age groups 3-5 and 6-11 (C), adolescents between 12 and 19 years (T) and adults from the age groups 20-39, 40-59 and 60 years and older (A). The sampling method is indicated in brackets: first morning urine void (mU), spot urine (sU) and 24-hours urine (24hU).

# DEHP metabolite MEHP (Mono(2-ethylhexyl) phthalate)

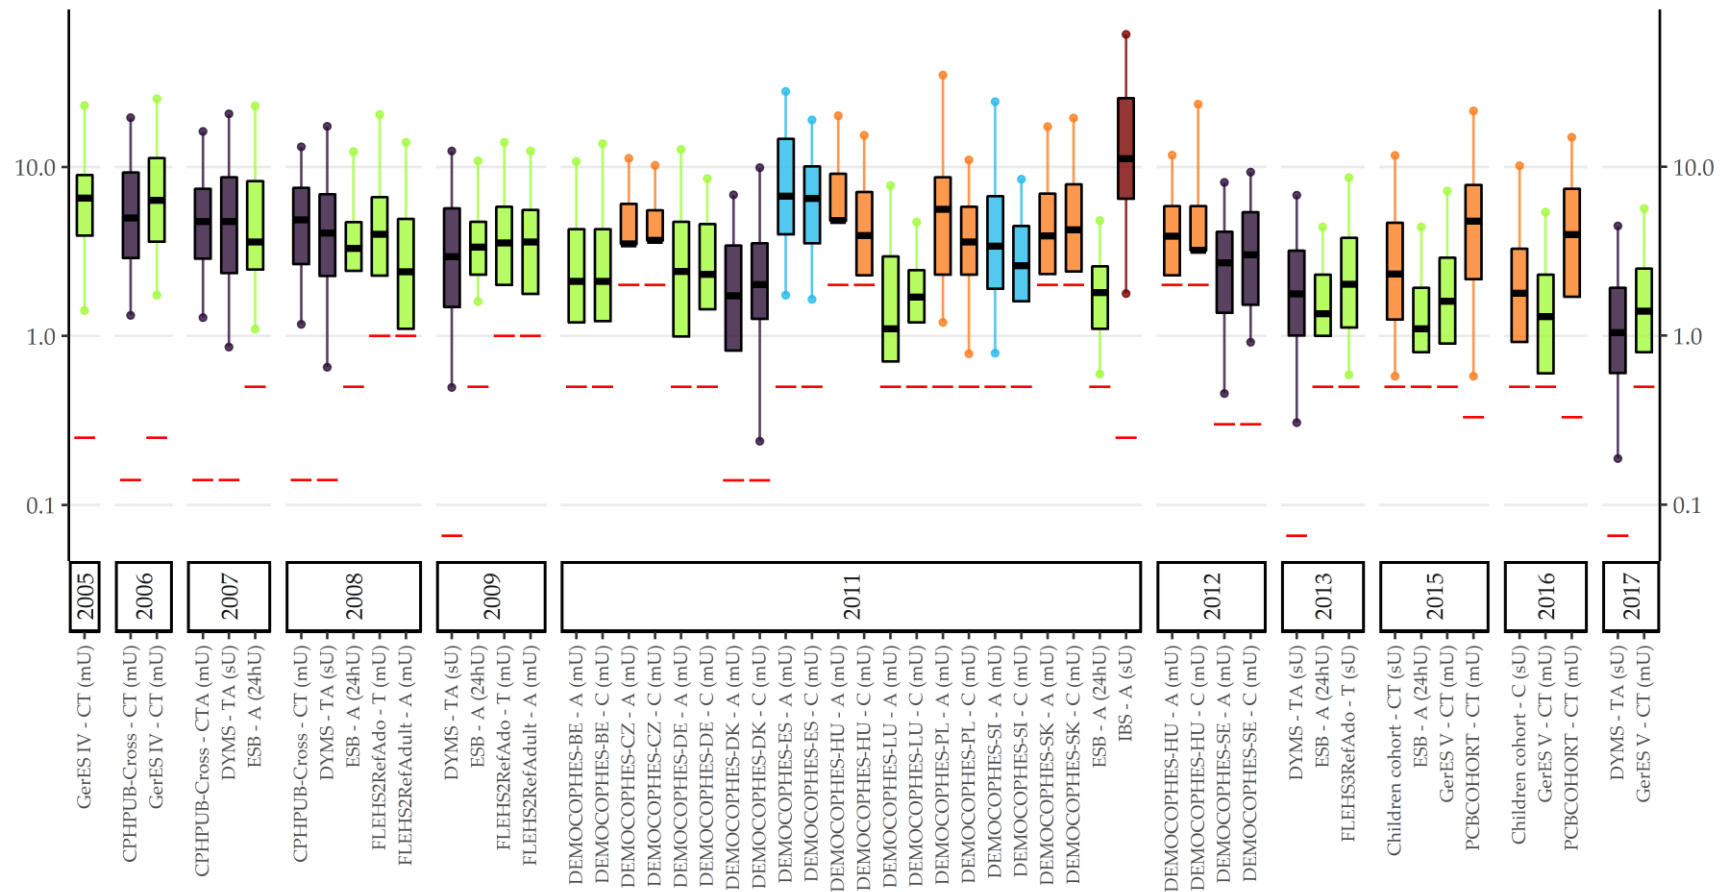

Figure S12. DEHP metabolite MEHP (Mono(2-ethylhexyl) phthalate) concentration in µg/L stratified by sampling year in boxplots.

The box is based on P25, P50, and P75, and the whiskers are based on P5 and P95. Within sampling years plots are sorted by country. Colors of the boxplots refer to the data collection's region (North = violet, South = blue, West = green, East = orange, Israel = dark red). Red lines denote LOQ/LOD for the respective study. Since percentiles are only available and displayed when they are above LOQ/LOD the lower side of boxplots might be truncated. The age categories are shown in capital letters: children of the age groups 3-5 and 6-11 (C), adolescents between 12 and 19 years (T) and adults from the age groups 20-39, 40-59 and 60 years and older (A). The sampling method is indicated in brackets: first morning urine void (mU), spot urine (sU) and 24-hours urine (24hU).

# DEHP metabolite MEHP (Mono(2-ethylhexyl) phthalate)

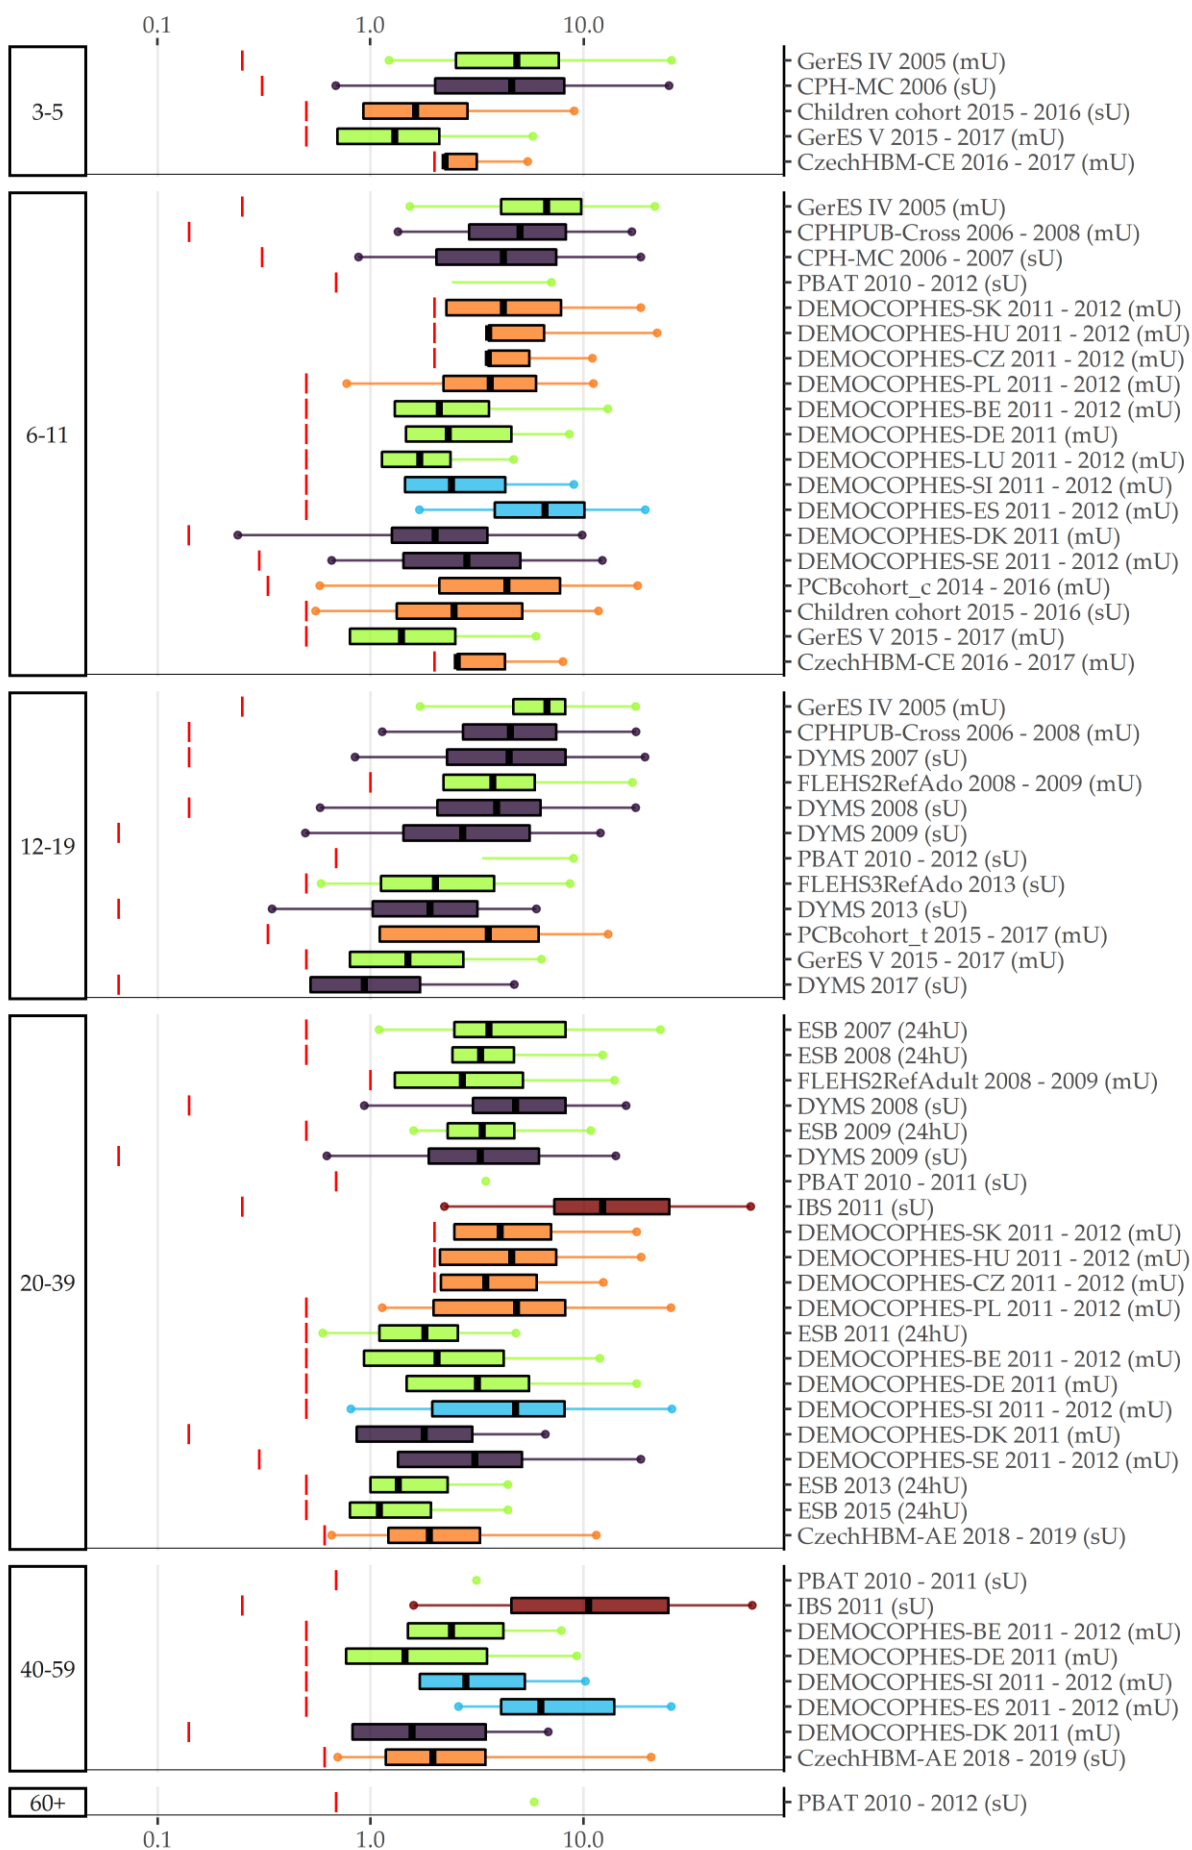

Figure S13. DEHP metabolite MEHP (Mono(2-ethylhexyl) phthalate) concentration in  $\mu\text{g/L}$  stratified by age groups in boxplots.

The box is based on P25, P50, and P75, and the whiskers are based on P5 and P95. Within age groups plots are chronologically sorted by year of sampling. Colors of the boxplots refer to the data collection's region (North = violet, South = blue, West = green, East = orange, Israel = dark red). Red lines denote LOQ/LOD for the respective study. Since percentiles are only available and displayed when they are above LOQ/LOD the lower side of boxplots might be truncated. The sampling method is indicated in brackets: first morning urine void (mU), spot urine (sU) and 24-hours urine (24hU).

## DnBP metabolite MnBP (Mono-n-butyl phthalate)

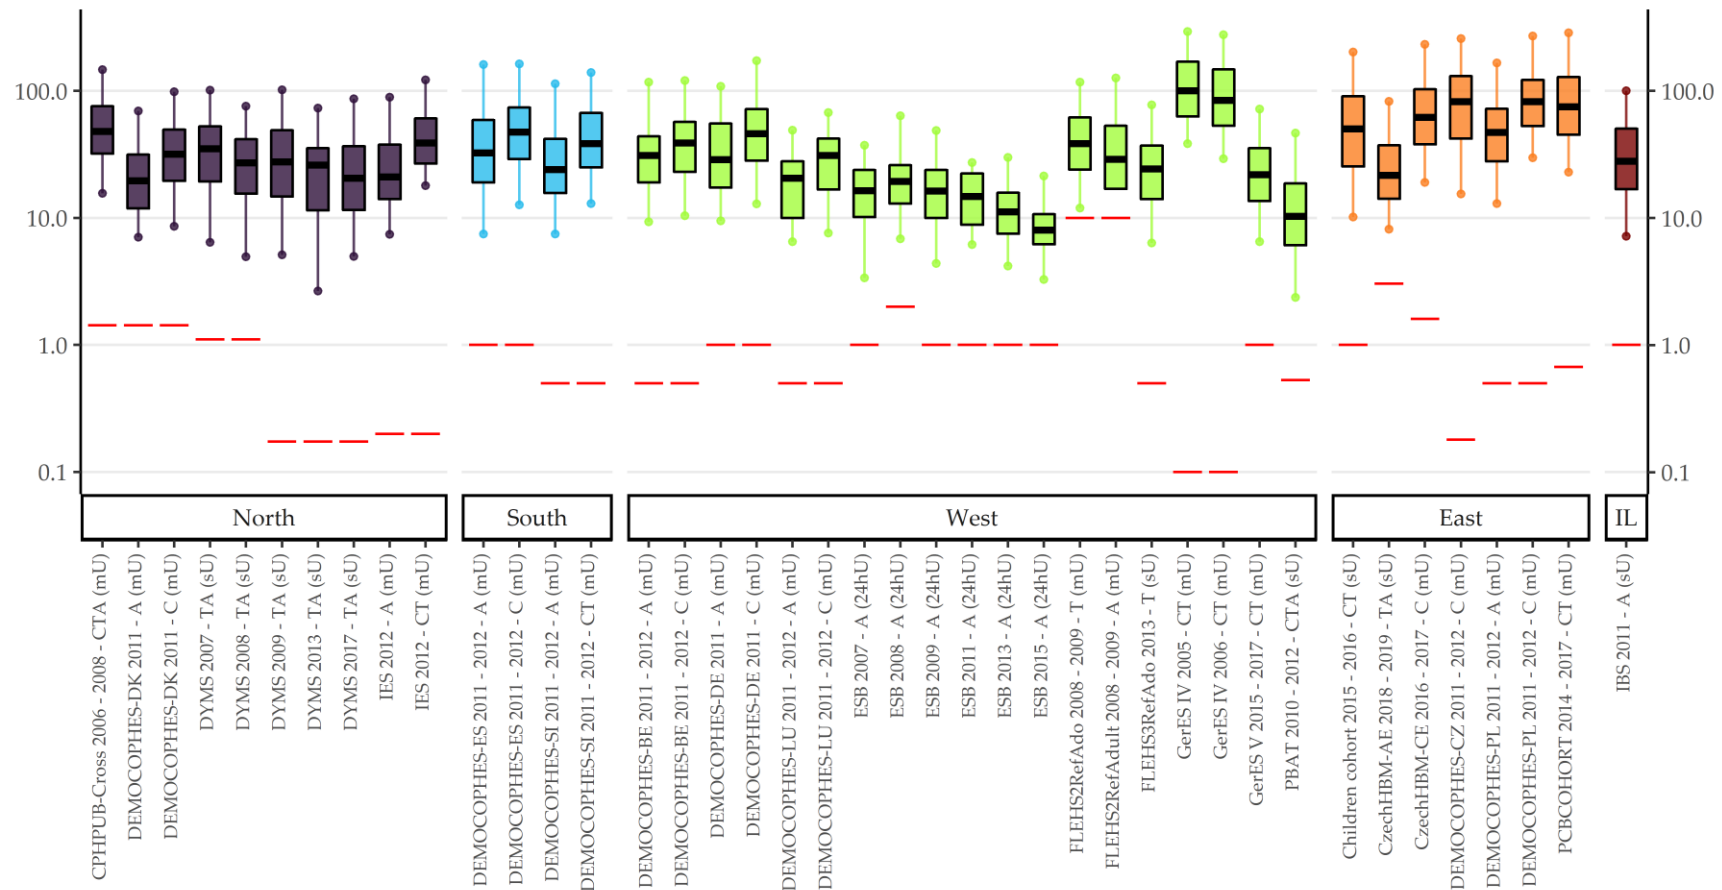

Figure S14. DnBP metabolite MnBP (Mono-n-butyl phthalate) concentration in  $\mu\text{g/L}$  stratified by region in boxplots.

The box is based on P25, P50, and P75, and the whiskers are based on P5 and P95. Within regions plots are sorted by country and year of sampling. Colors of the boxplots refer to the data collection's region (North = violet, South = blue, West = green, East = orange, Israel = dark red). Red lines denote LOQ/LOD for the respective study. Since percentiles are only available and displayed when they are above LOQ/LOD the lower side of boxplots might be truncated. The age categories are shown in capital letters: children of the age groups 3-5 and 6-11 (C), adolescents between 12 and 19 years (T) and adults from the age groups 20-39, 40-59 and 60 years and older (A). The sampling method is indicated in brackets: first morning urine void (mU), spot urine (sU) and 24-hours urine (24hU).

## DnBP metabolite MnBP (Mono-n-butyl phthalate)

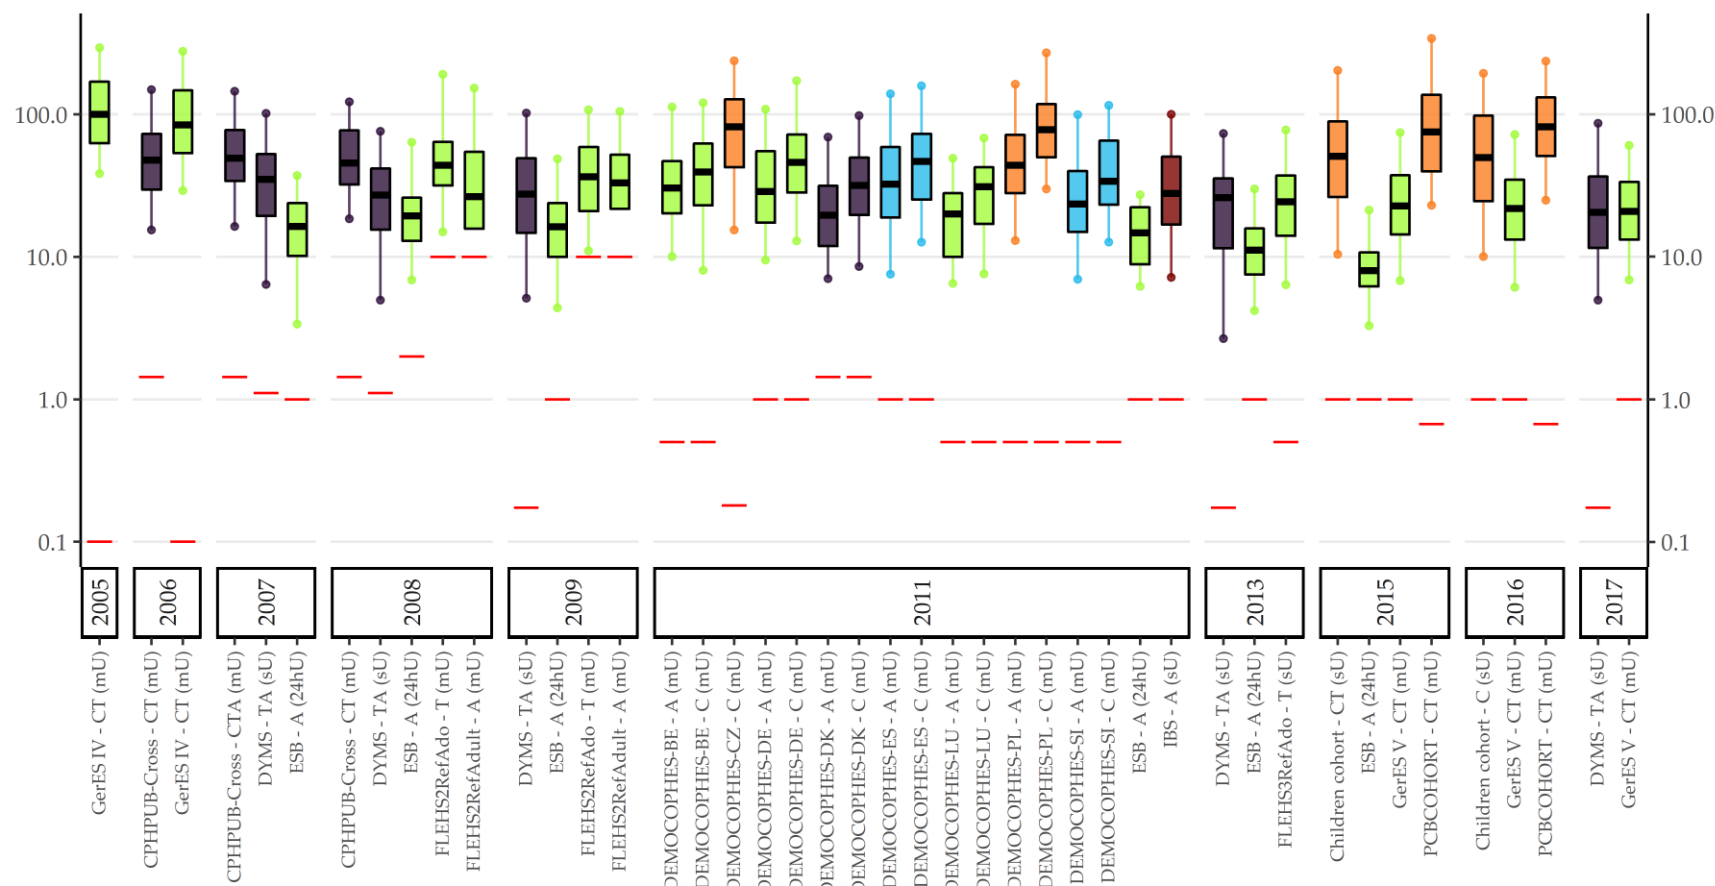

Figure S15. DnBP metabolite MnBP (Mono-n-butyl phthalate) concentration in µg/L stratified by sampling year in boxplots.

The box is based on P25, P50, and P75, and the whiskers are based on P5 and P95. Within sampling years plots are sorted by country. Colors of the boxplots refer to the data collection's region (North = violet, South = blue, West = green, East = orange, Israel = dark red). Red lines denote LOQ/LOD for the respective study. Since percentiles are only available and displayed when they are above LOQ/LOD the lower side of boxplots might be truncated. The age categories are shown in capital letters: children of the age groups 3-5 and 6-11 (C), adolescents between 12 and 19 years (T) and adults from the age groups 20-39, 40-59 and 60 years and older (A). The sampling method is indicated in brackets: first morning urine void (mU), spot urine (sU) and 24-hours urine (24hU).

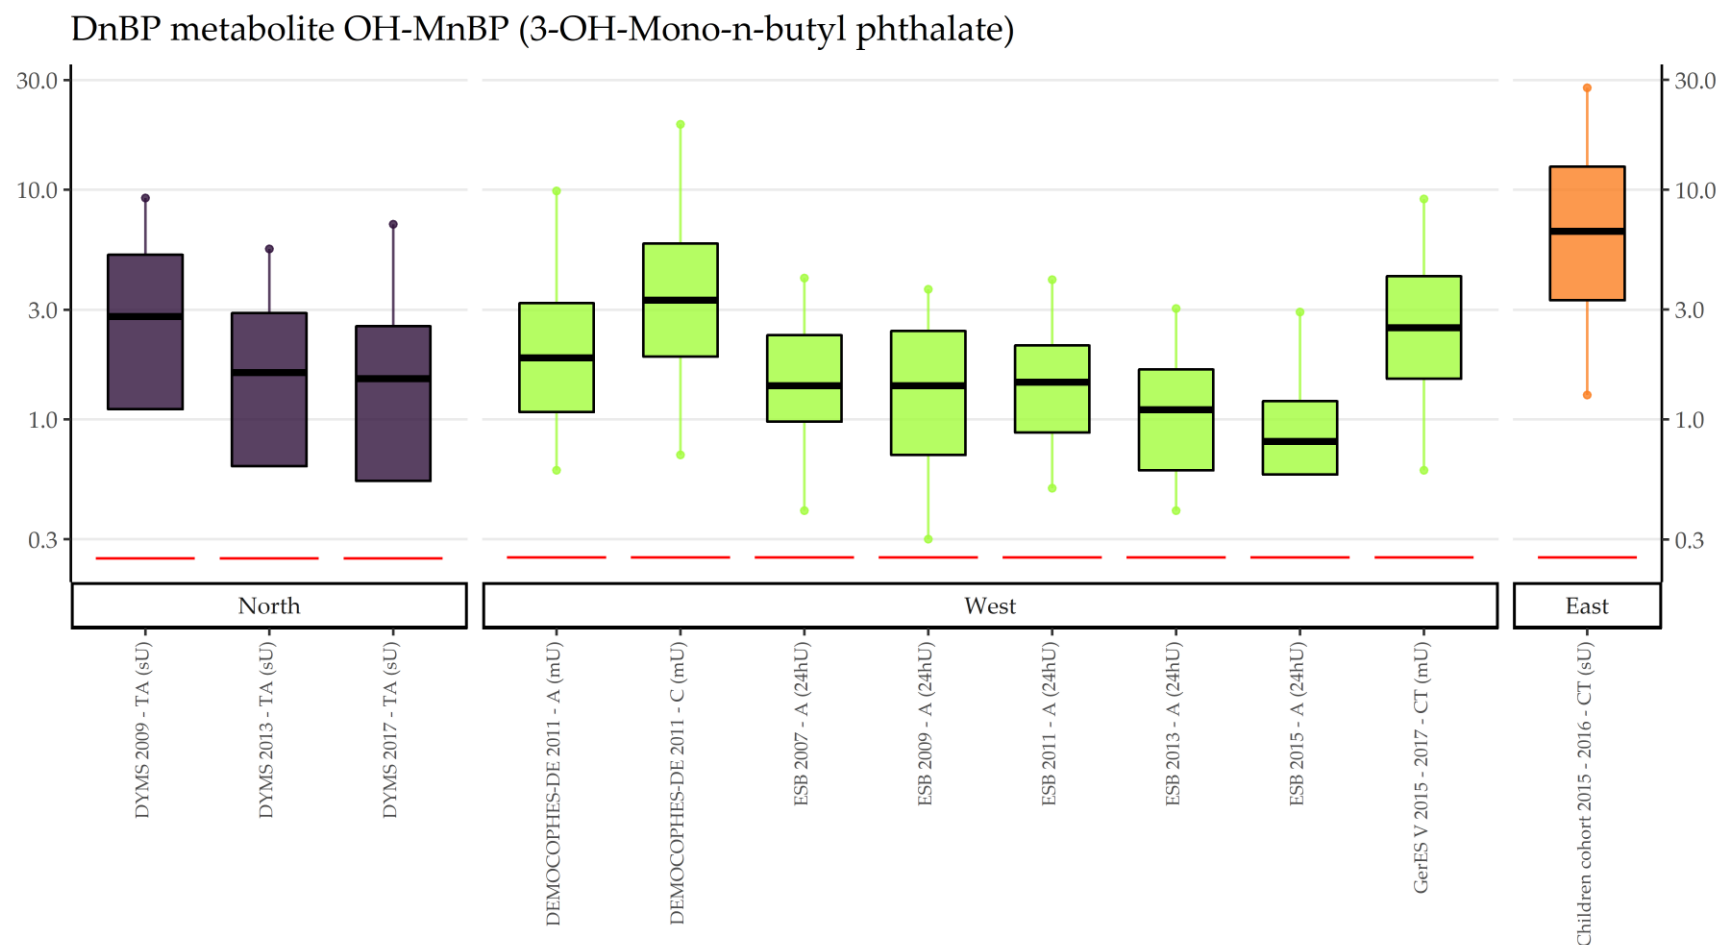

Figure S16. DnBP metabolite OH-MnBP (3-OH-Mono-n-butyl phthalate) concentration in µg/L stratified by region in boxplots.

The box is based on P25, P50, and P75, and the whiskers are based on P5 and P95. Within regions plots are sorted by country and year of sampling. Colors of the boxplots refer to the data collection's region (North = violet, South = blue, West = green, East = orange, Israel = dark red). Red lines denote LOQ/LOD for the respective study. Since percentiles are only available and displayed when they are above LOQ/LOD the lower side of boxplots might be truncated. The age categories are shown in capital letters: children of the age groups 3-5 and 6-11 (C), adolescents between 12 and 19 years (T) and adults from the age groups 20-39, 40-59 and 60 years and older (A). The sampling method is indicated in brackets: first morning urine void (mU), spot urine (sU) and 24-hours urine (24hU).

# DnBP metabolite OH-MnBP (3-OH-Mono-n-butyl phthalate)

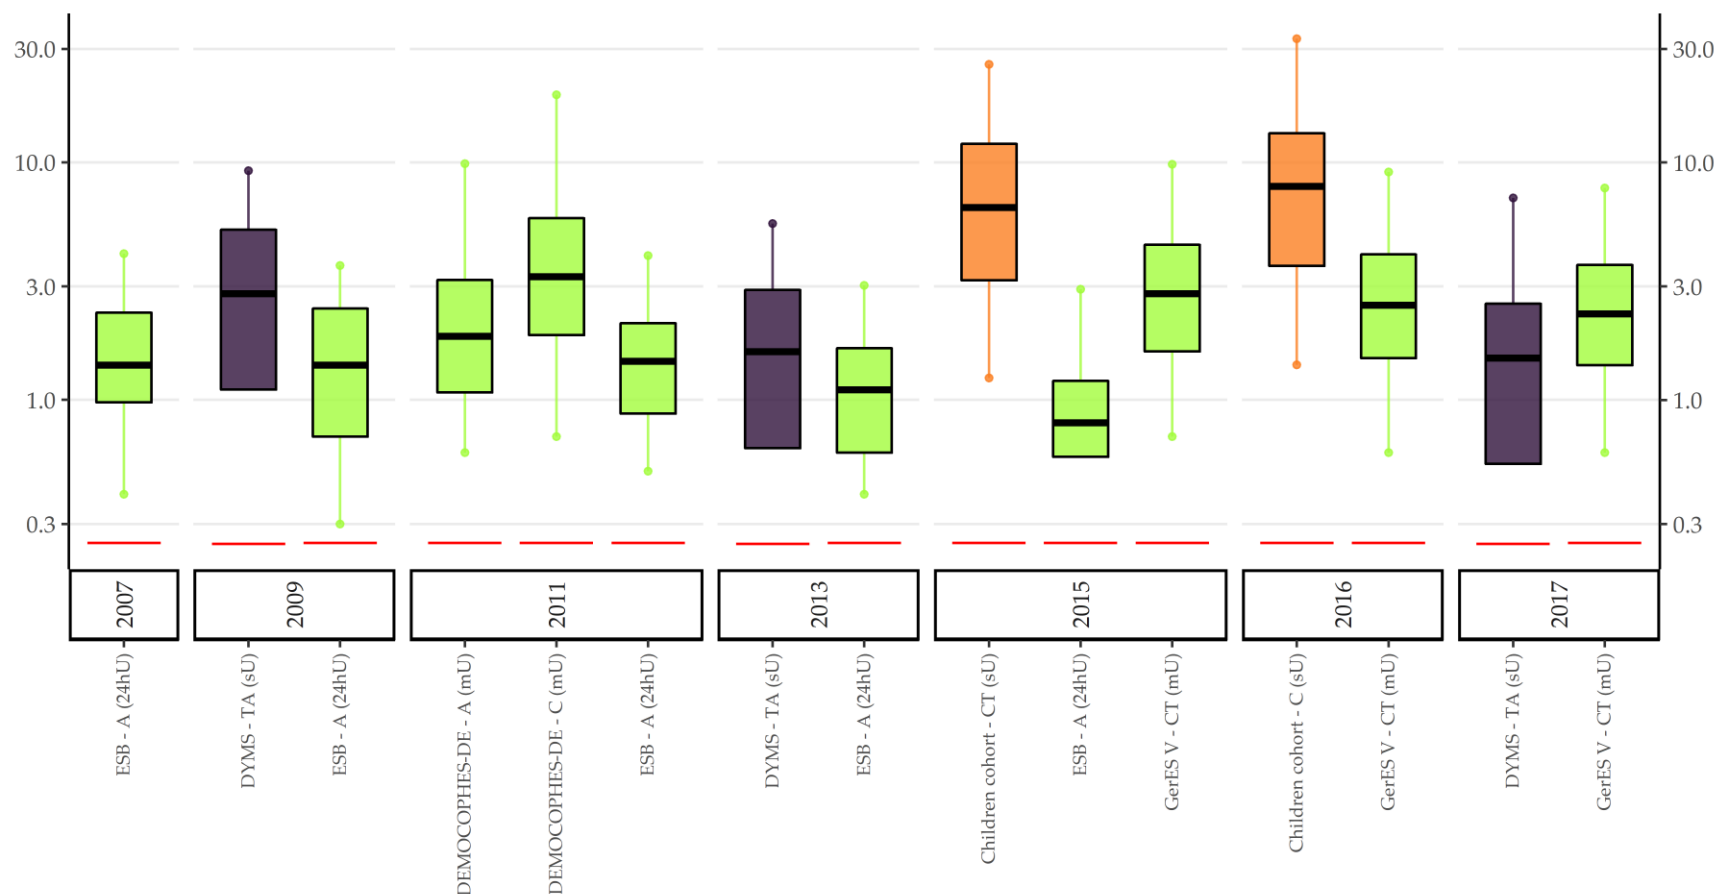

Figure S17. DnBP metabolite OH-MnBP (3-OH-Mono-n-butyl phthalate) concentration in µg/L stratified by sampling year in boxplots.

The box is based on P25, P50, and P75, and the whiskers are based on P5 and P95. Within sampling years plots are sorted by country. Colors of the boxplots refer to the data collection's region (North = violet, South = blue, West = green, East = orange, Israel = dark red). Red lines denote LOQ/LOD for the respective study. Since percentiles are only available and displayed when they are above LOQ/LOD the lower side of boxplots might be truncated. The age categories are shown in capital letters: children of the age groups 3-5 and 6-11 (C), adolescents between 12 and 19 years (T) and adults from the age groups 20-39, 40-59 and 60 years and older (A). The sampling method is indicated in brackets: first morning urine void (mU), spot urine (sU) and 24-hours urine (24hU).

# DnBP metabolite OH-MnBP (3-OH-Mono-n-butyl phthalate)

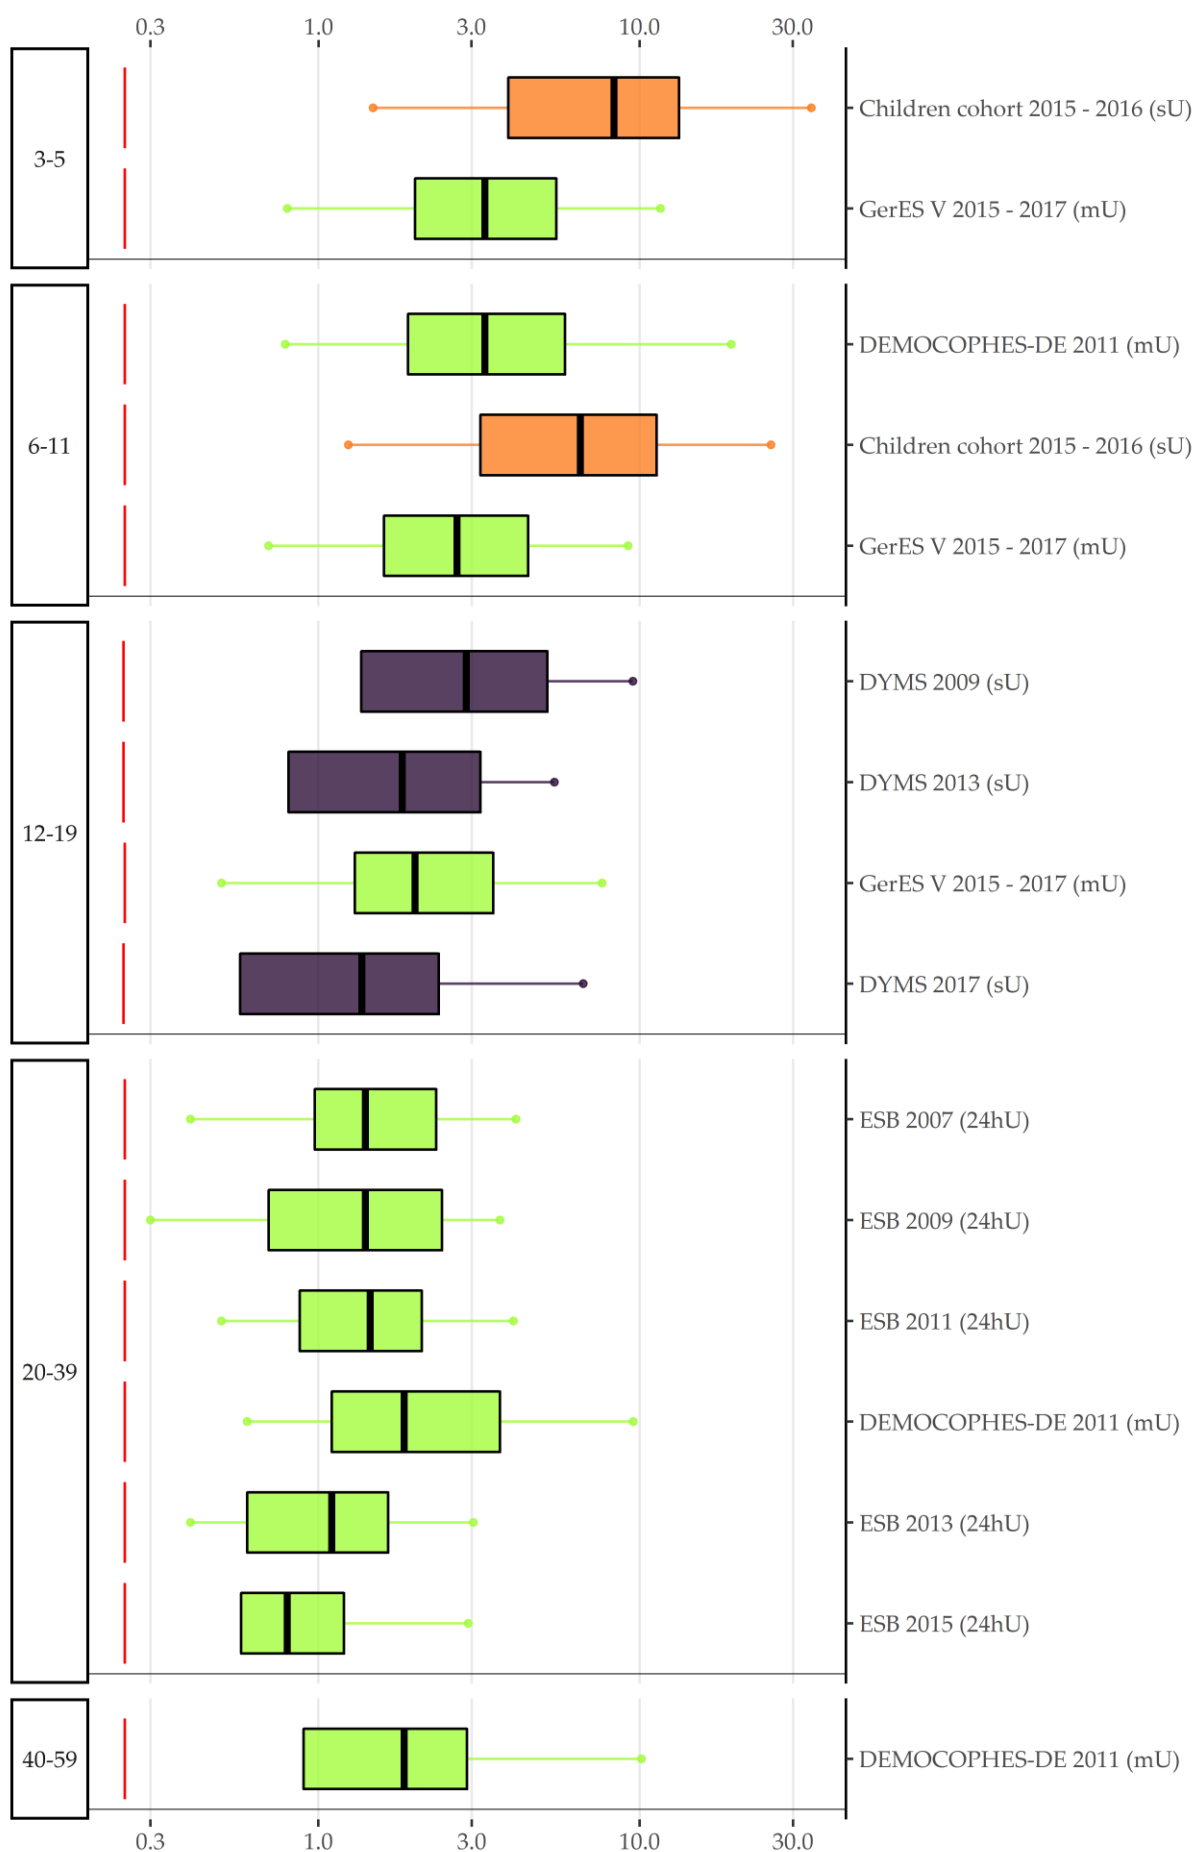

Figure S18. DnBP metabolite OH-MnBP (3-OH-Mono-n-butyl phthalate) concentration in µg/L stratified by age groups in boxplots.

The box is based on P25, P50, and P75, and the whiskers are based on P5 and P95. Within age groups plots are chronologically sorted by year of sampling. Colors of the boxplots refer to the data collection's region (North = violet, South = blue, West = green, East = orange, Israel = dark red). Red lines denote LOQ/LOD for the respective study. Since percentiles are only available and displayed when they are above LOQ/LOD the lower side of boxplots might be truncated. The sampling method is indicated in brackets: first morning urine void (mU), spot urine (sU) and 24-hours urine (24hU).

## DiBP metabolite MiBP (Mono-isobutyl phthalate)

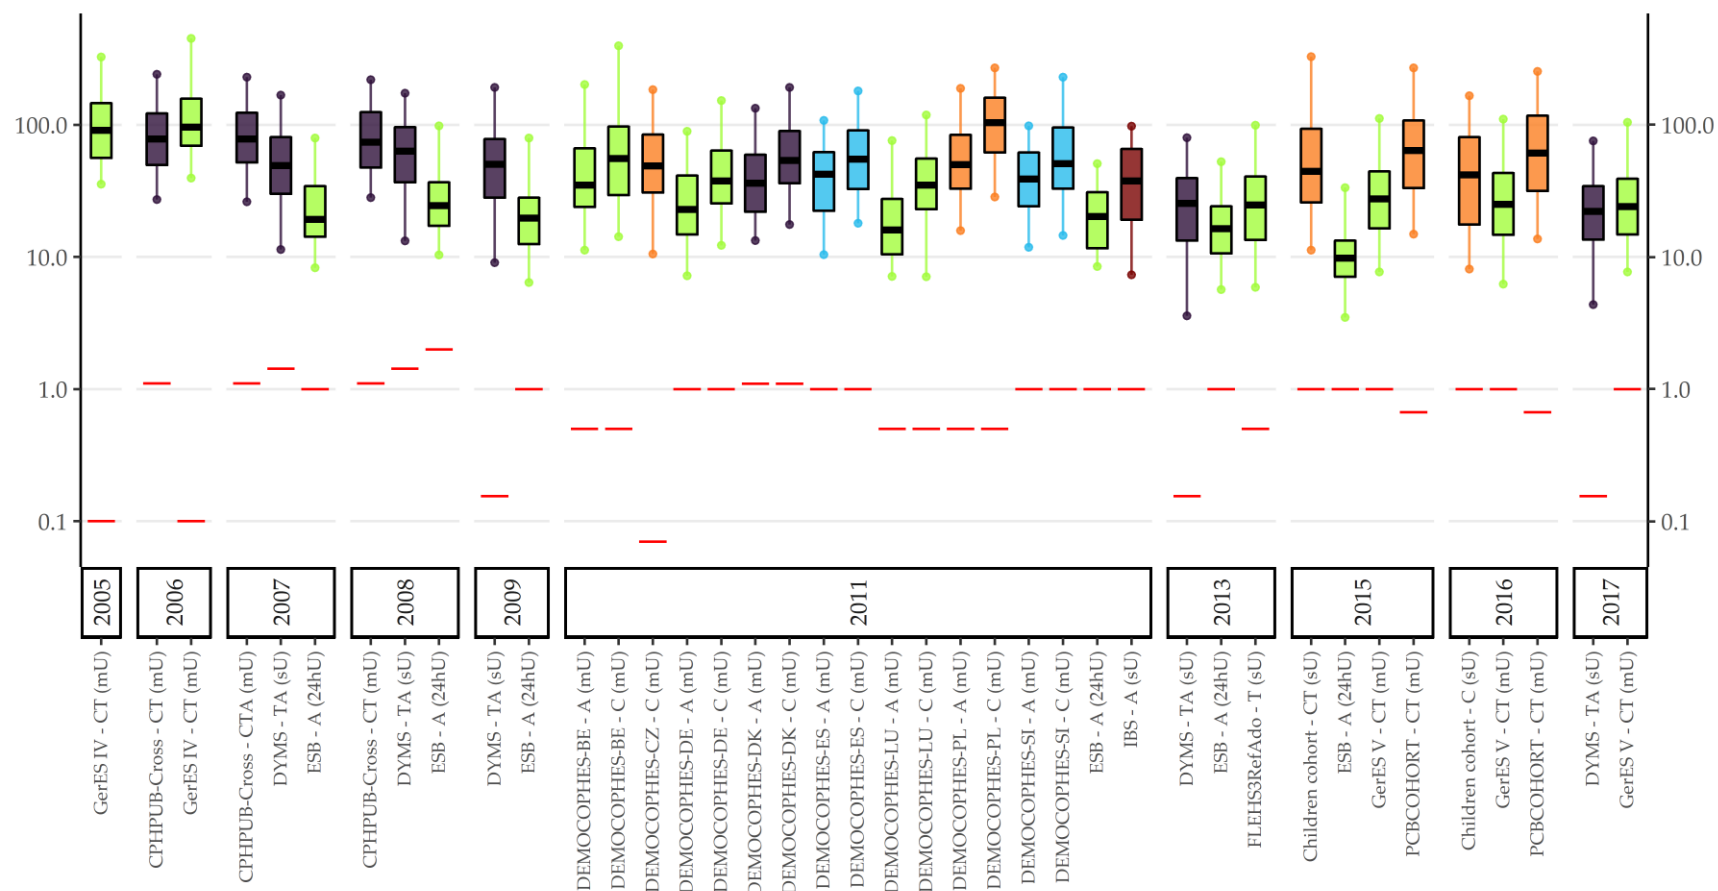

Figure S19. DiBP metabolite MiBP (Mono-isobutyl phthalate) concentration in µg/L stratified by sampling year in boxplots.

The box is based on P25, P50, and P75, and the whiskers are based on P5 and P95. Within sampling years plots are sorted by country. Colors of the boxplots refer to the data collection's region (North = violet, South = blue, West = green, East = orange, Israel = dark red). Red lines denote LOQ/LOD for the respective study. Since percentiles are only available and displayed when they are above LOQ/LOD the lower side of boxplots might be truncated. The age categories are shown in capital letters: children of the age groups 3-5 and 6-11 (C), adolescents between 12 and 19 years (T) and adults from the age groups 20-39, 40-59 and 60 years and older (A). The sampling method is indicated in brackets: first morning urine void (mU), spot urine (sU) and 24-hours urine (24hU).

# DiBP metabolite MiBP (Mono-isobutyl phthalate)

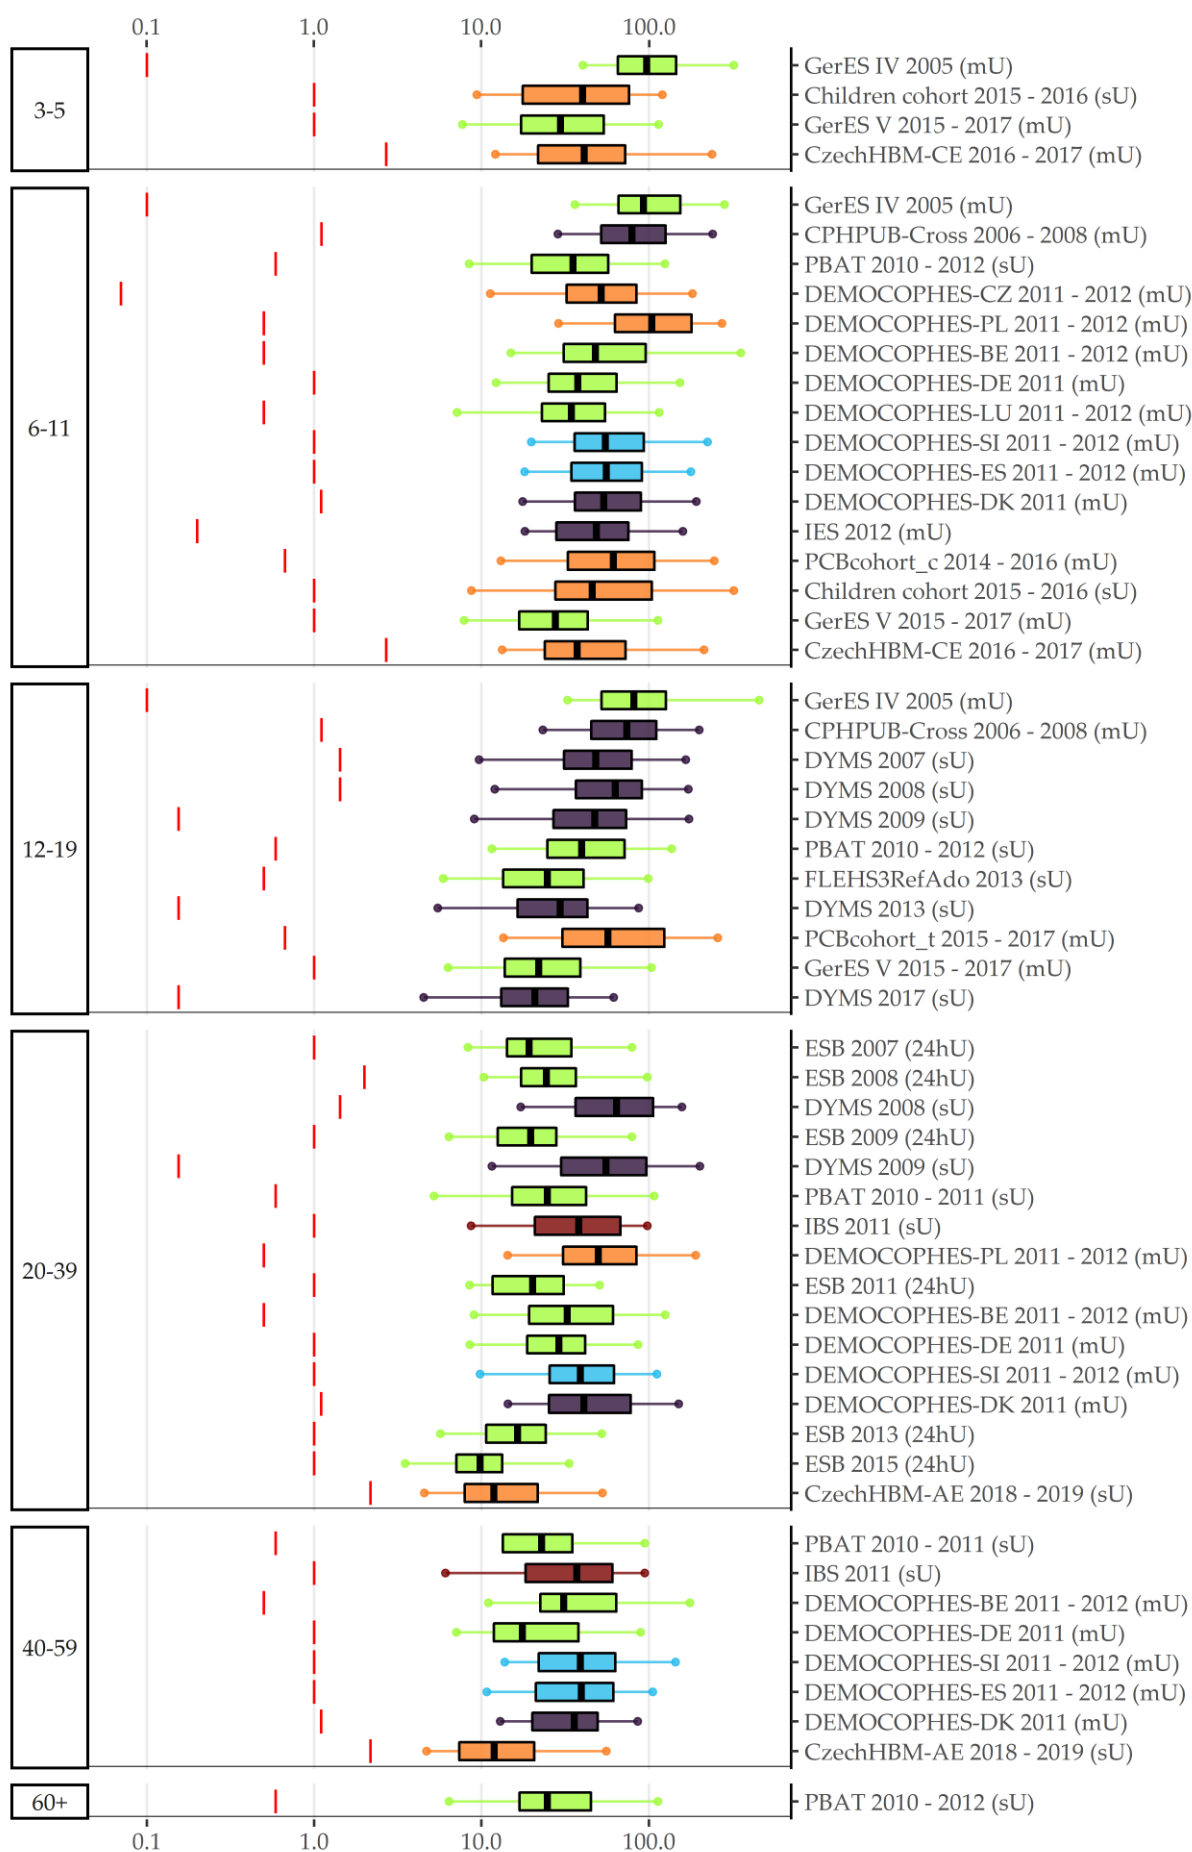

Figure S20. DiBP metabolite MiBP (Mono-isobutyl phthalate) concentration in  $\mu\text{g/L}$  stratified by age groups in boxplots.

The box is based on P25, P50, and P75, and the whiskers are based on P5 and P95. Within age groups plots are chronologically sorted by year of sampling. Colors of the boxplots refer to the data collection's region (North = violet, South = blue, West = green, East = orange, Israel = dark red). Red lines denote LOQ/LOD for the respective study. Since percentiles are only available and displayed when they are above LOQ/LOD the lower side of boxplots might be truncated. The sampling method is indicated in brackets: first morning urine void (mU), spot urine (sU) and 24-hours urine (24hU).

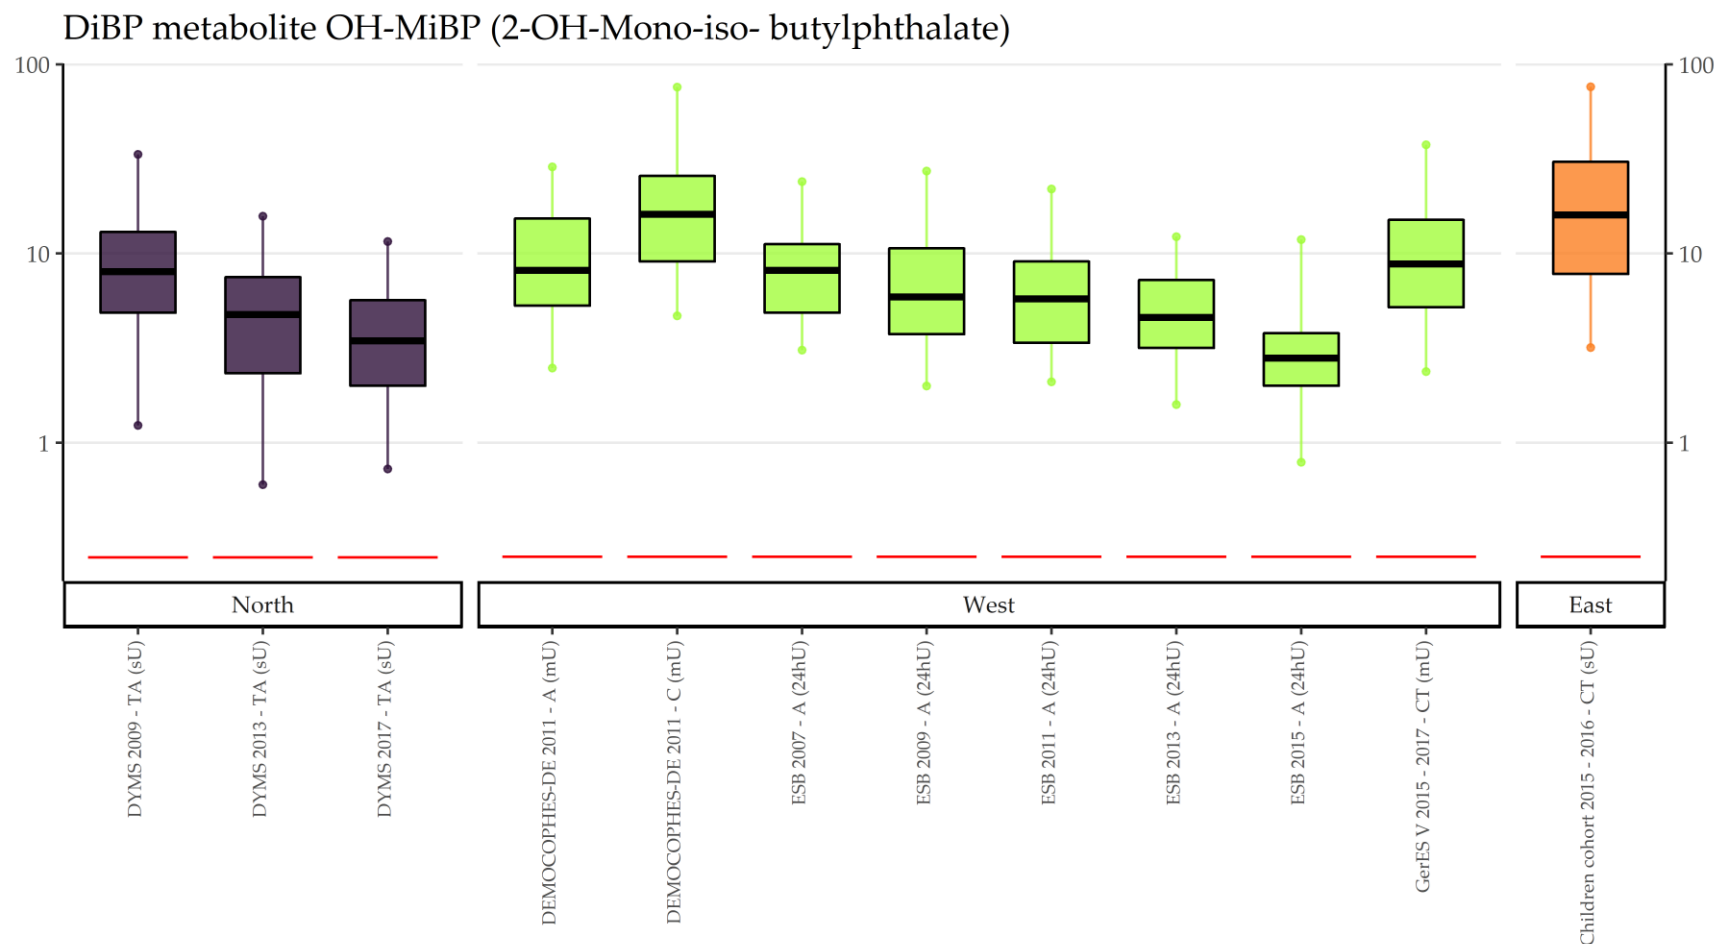

Figure S21. DiBP metabolite OH-MiBP (2-OH-Mono-iso- butylphthalate) concentration in µg/L stratified by region in boxplots.

The box is based on P25, P50, and P75, and the whiskers are based on P5 and P95. Within regions plots are sorted by country and year of sampling. Colors of the boxplots refer to the data collection's region (North = violet, South = blue, West = green, East = orange, Israel = dark red). Red lines denote LOQ/LOD for the respective study. Since percentiles are only available and displayed when they are above LOQ/LOD the lower side of boxplots might be truncated. The age categories are shown in capital letters: children of the age groups 3-5 and 6-11 (C), adolescents between 12 and 19 years (T) and adults from the age groups 20-39, 40-59 and 60 years and older (A). The sampling method is indicated in brackets: first morning urine void (mU), spot urine (sU) and 24-hours urine (24hU).

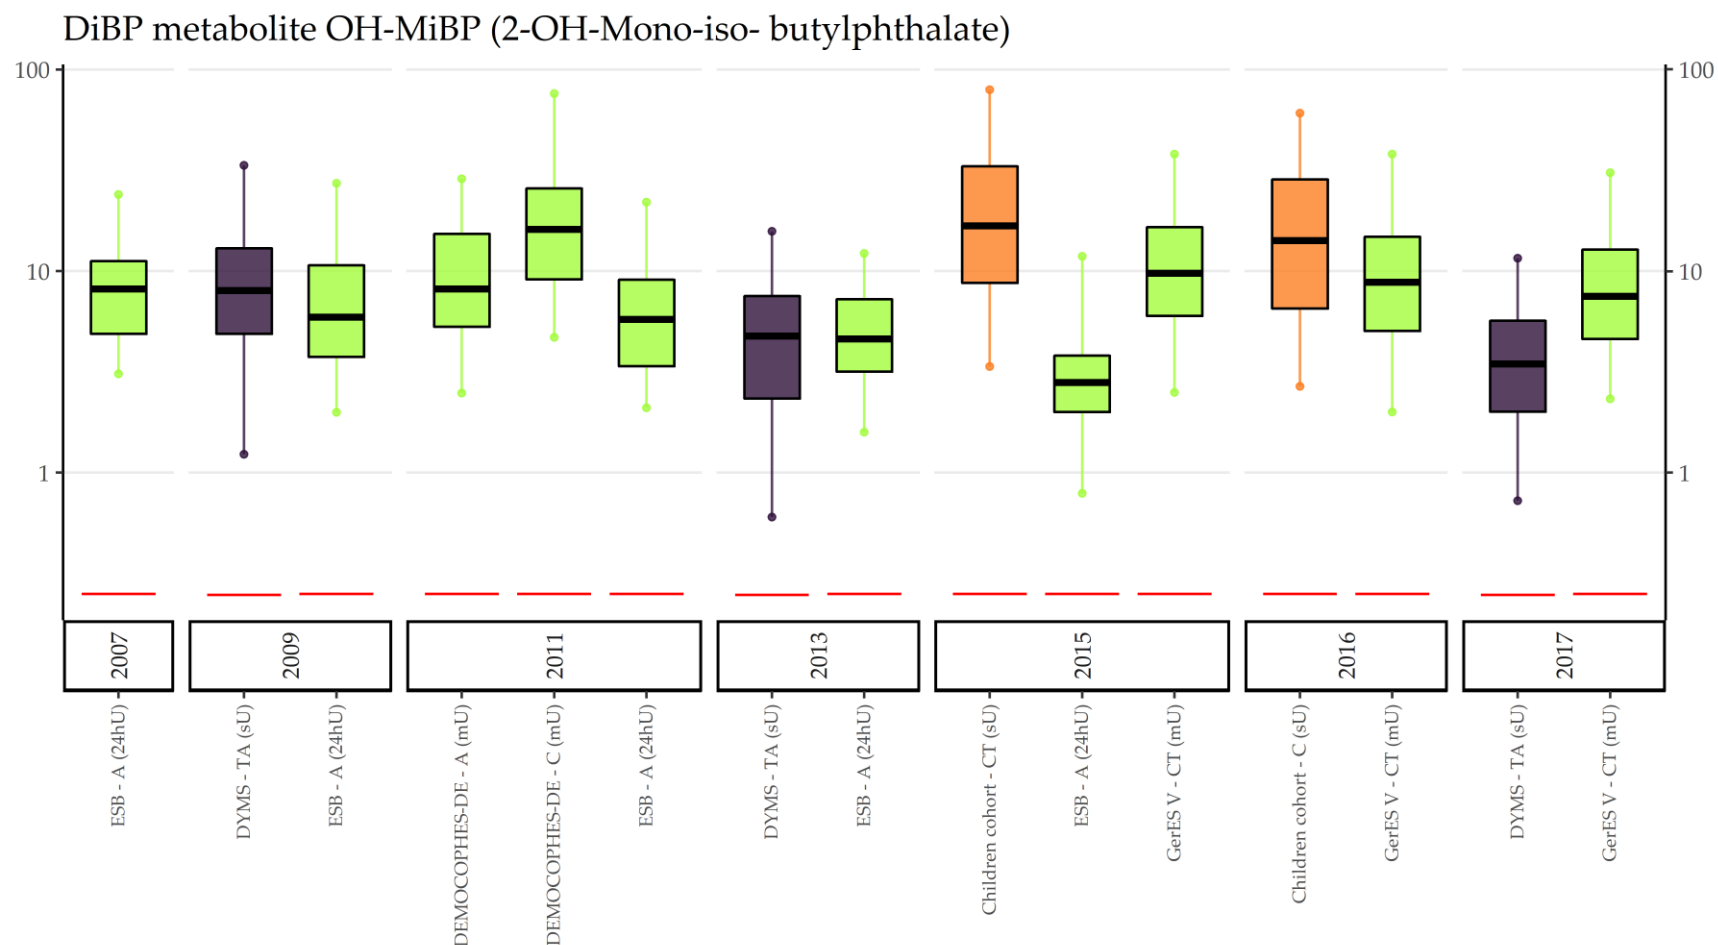

Figure S22. DiBP metabolite OH-MiBP (2-OH-Mono-iso- butylphthalate) concentration in µg/L stratified by sampling year in boxplots.

The box is based on P25, P50, and P75, and the whiskers are based on P5 and P95. Within sampling years plots are sorted by country. Colors of the boxplots refer to the data collection's region (North = violet, South = blue, West = green, East = orange, Israel = dark red). Red lines denote LOQ/LOD for the respective study. Since percentiles are only available and displayed when they are above LOQ/LOD the lower side of boxplots might be truncated. The age categories are shown in capital letters: children of the age groups 3-5 and 6-11 (C), adolescents between 12 and 19 years (T) and adults from the age groups 20-39, 40-59 and 60 years and older (A). The sampling method is indicated in brackets: first morning urine void (mU), spot urine (sU) and 24-hours urine (24hU).

# DiBP metabolite OH-MiBP (2-OH-Mono-iso- butylphthalate)

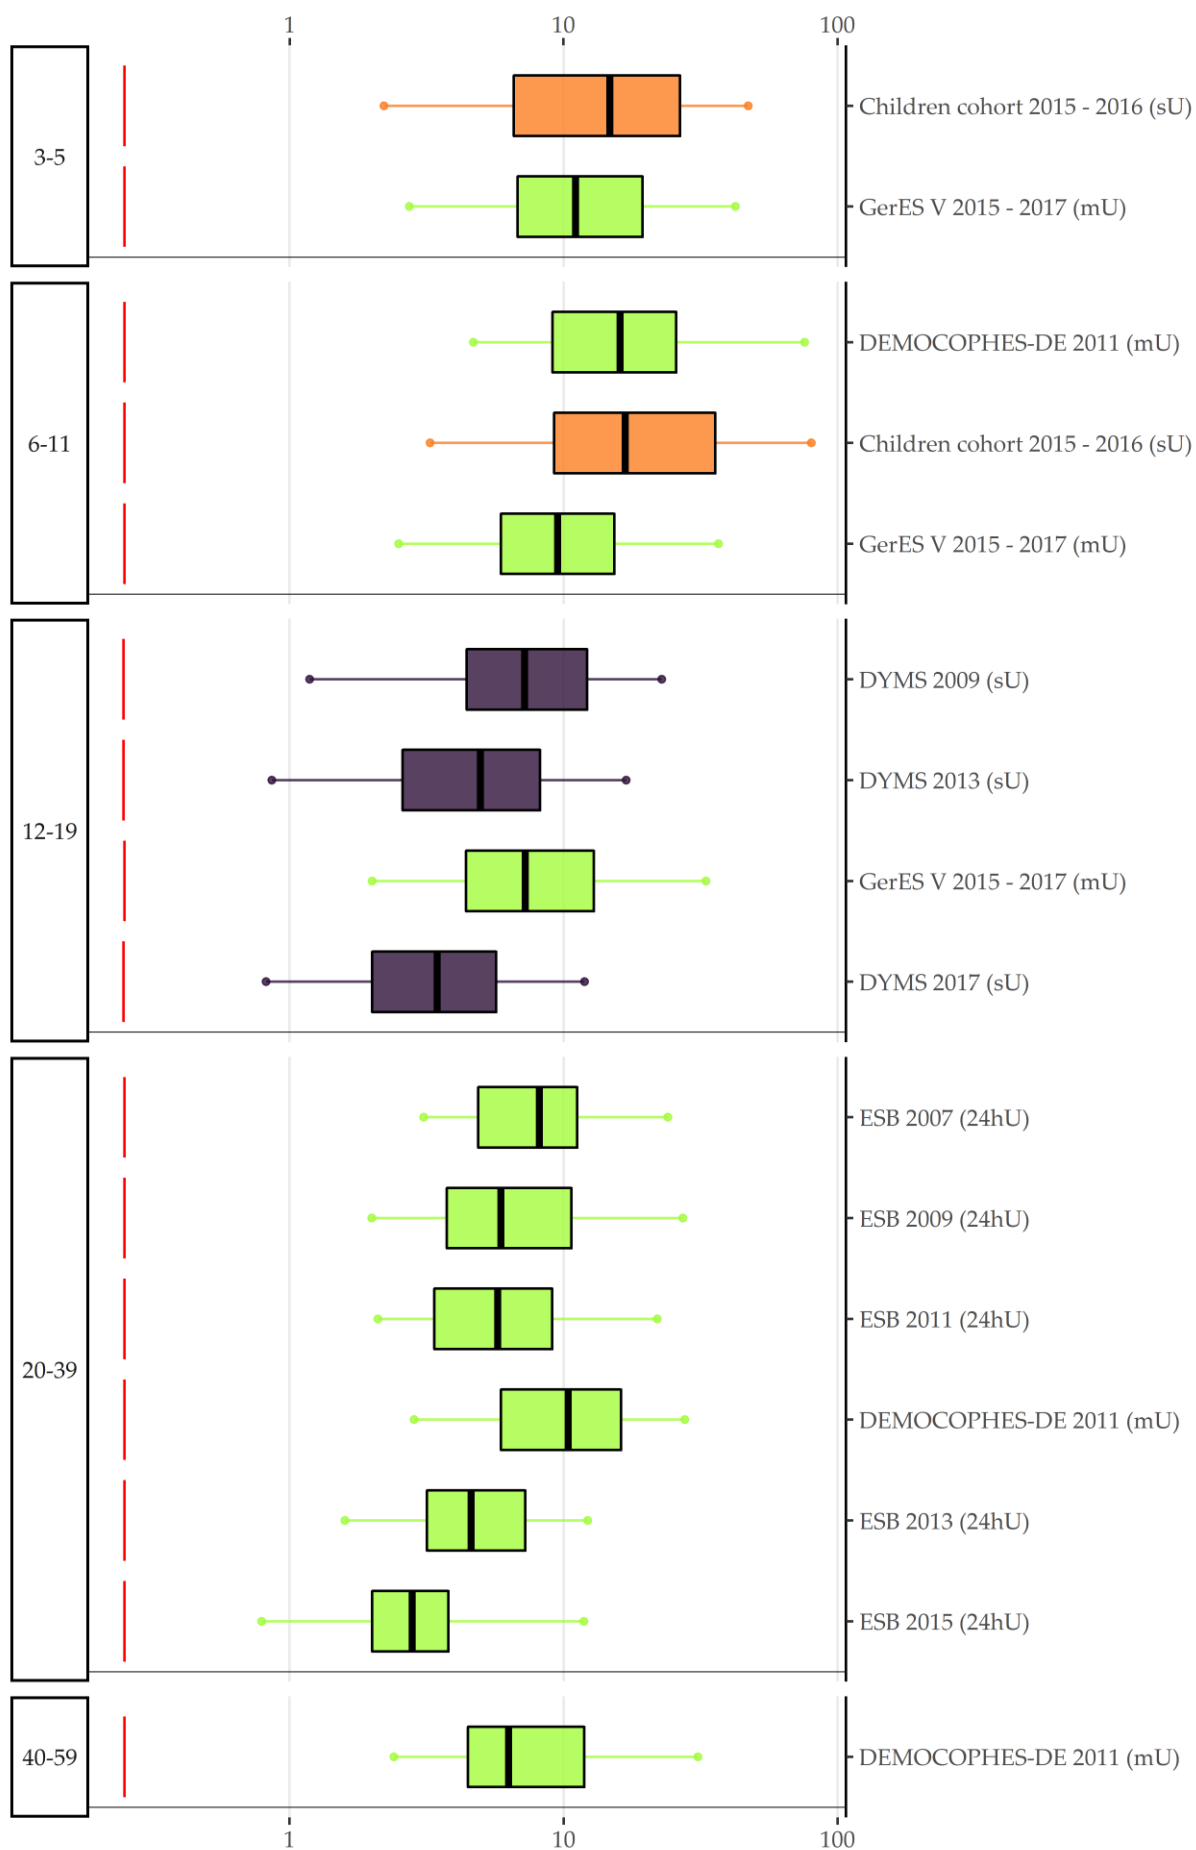

Figure S23. DiBP metabolite OH-MiBP (2-OH-Mono-iso- butylphthalate) concentration in µg/L stratified by age groups in boxplots.

The box is based on P25, P50, and P75, and the whiskers are based on P5 and P95. Within age groups plots are chronologically sorted by year of sampling. Colors of the boxplots refer to the data collection's region (North = violet, South = blue, West = green, East = orange, Israel = dark red). Red lines denote LOQ/LOD for the respective study. Since percentiles are only available and displayed when they are above LOQ/LOD the lower side of boxplots might be truncated. The sampling method is indicated in brackets: first morning urine void (mU), spot urine (sU) and 24-hours urine (24hU).

## DEP metabolite MEP (Mono-ethyl phthalate)

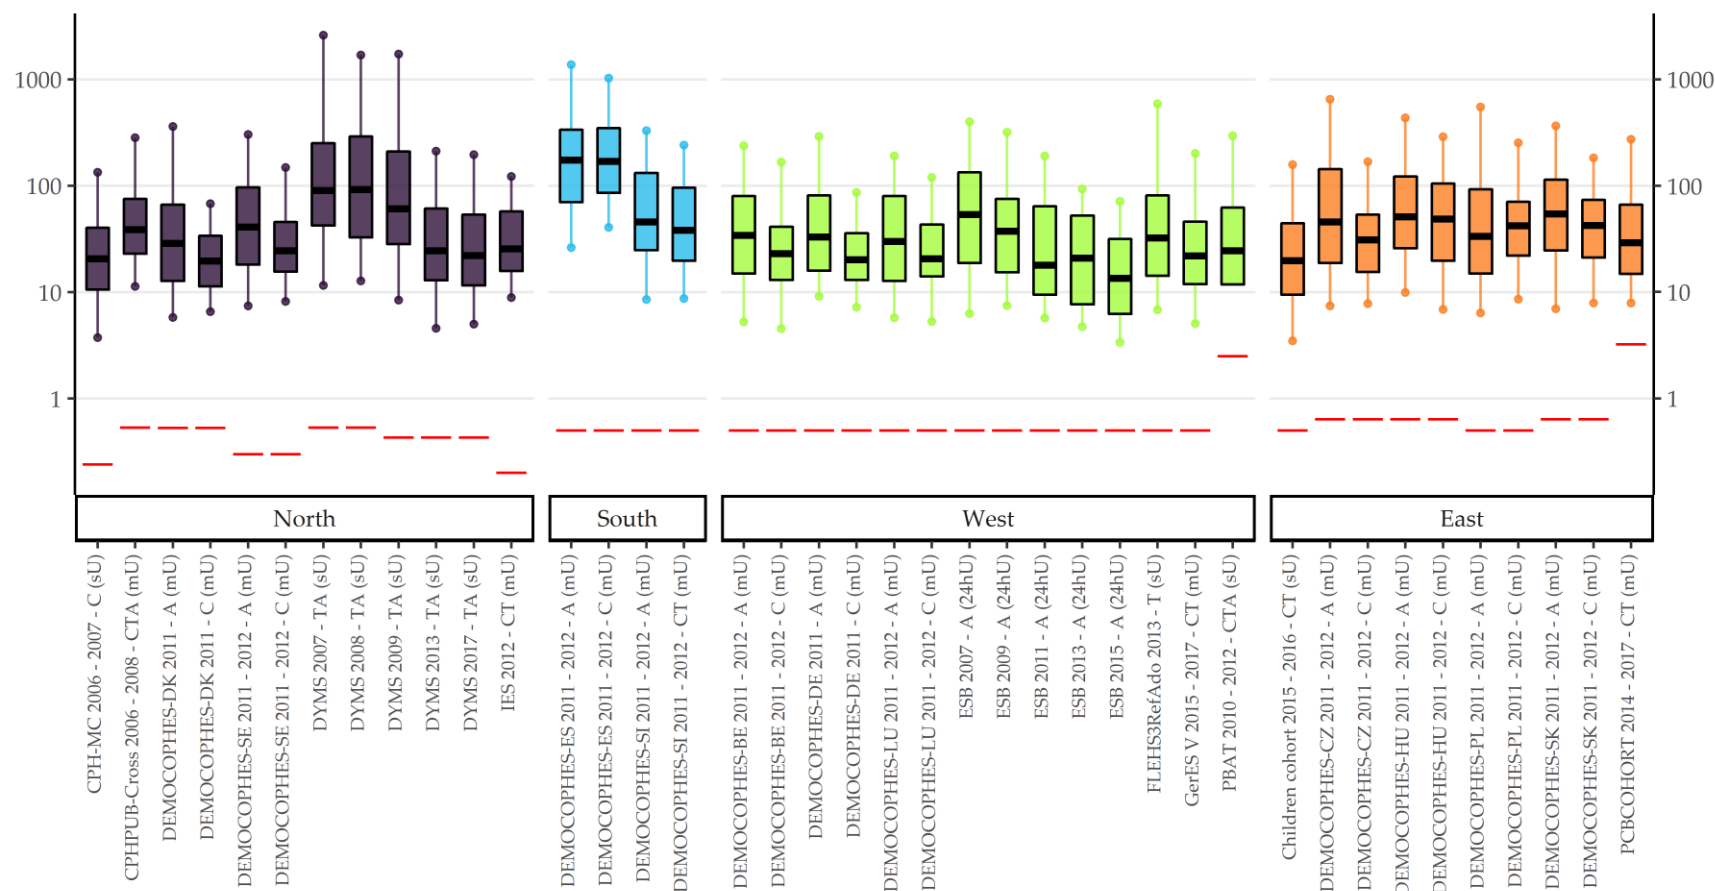

Figure S24. DEP metabolite MEP (Mono-ethyl phthalate) concentration in µg/L stratified by region in boxplots.

The box is based on P25, P50, and P75, and the whiskers are based on P5 and P95. Within regions plots are sorted by country and year of sampling. Colors of the boxplots refer to the data collection's region (North = violet, South = blue, West = green, East = orange, Israel = dark red). Red lines denote LOQ/LOD for the respective study. Since percentiles are only available and displayed when they are above LOQ/LOD the lower side of boxplots might be truncated. The age categories are shown in capital letters: children of the age groups 3-5 and 6-11 (C), adolescents between 12 and 19 years (T) and adults from the age groups 20-39, 40-59 and 60 years and older (A). The sampling method is indicated in brackets: first morning urine void (mU), spot urine (sU) and 24-hours urine (24hU).

## DEP metabolite MEP (Mono-ethyl phthalate)

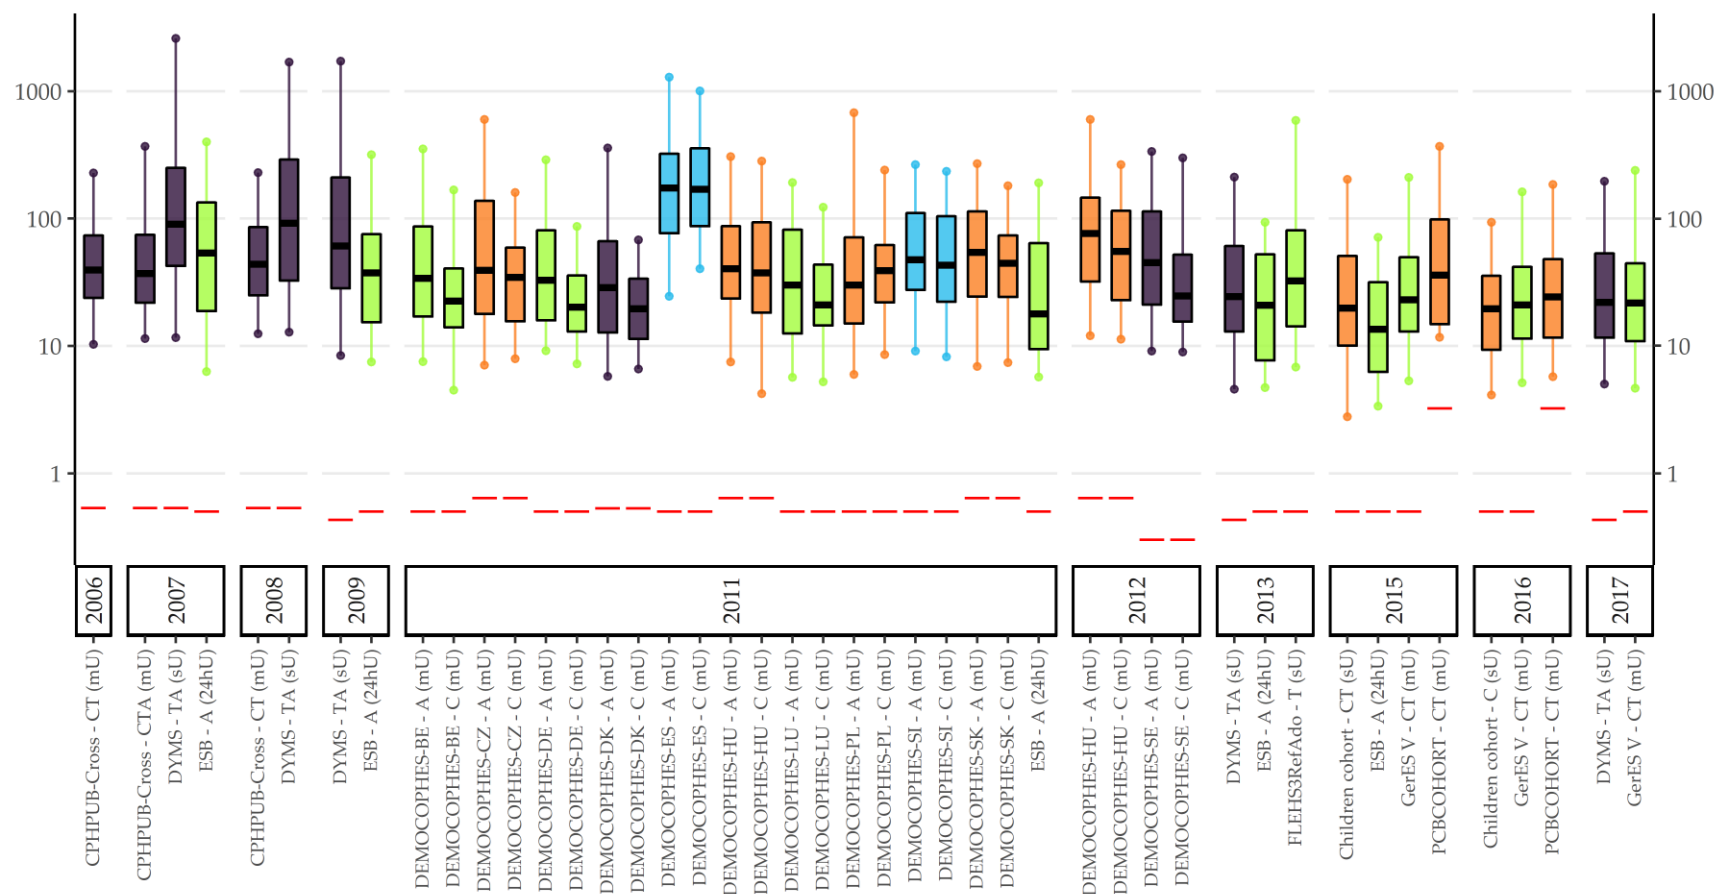

Figure S25. DEP metabolite MEP (Mono-ethyl phthalate) concentration in µg/L stratified by sampling year in boxplots.

The box is based on P25, P50, and P75, and the whiskers are based on P5 and P95. Within sampling years plots are sorted by country. Colors of the boxplots refer to the data collection's region (North = violet, South = blue, West = green, East = orange, Israel = dark red). Red lines denote LOQ/LOD for the respective study. Since percentiles are only available and displayed when they are above LOQ/LOD the lower side of boxplots might be truncated. The age categories are shown in capital letters: children of the age groups 3-5 and 6-11 (C), adolescents between 12 and 19 years (T) and adults from the age groups 20-39, 40-59 and 60 years and older (A). The sampling method is indicated in brackets: first morning urine void (mU), spot urine (sU) and 24-hours urine (24hU).

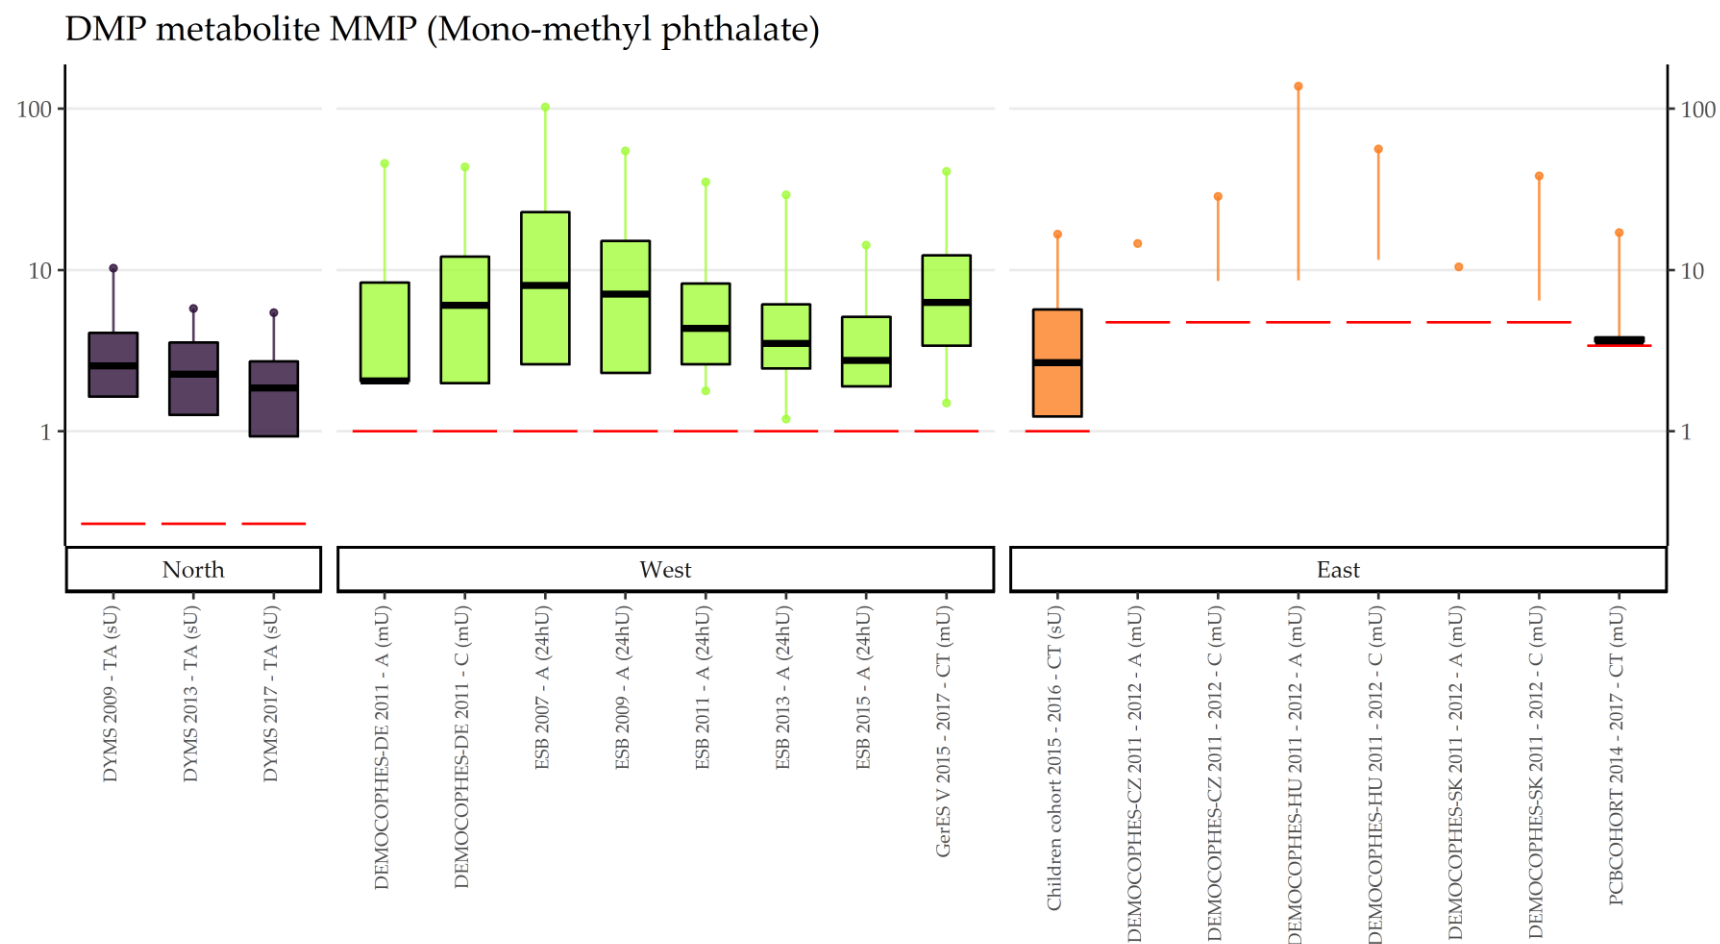

Figure S26. DMP metabolite MMP (Mono-methyl phthalate) concentration in µg/L stratified by region in boxplots.

The box is based on P25, P50, and P75, and the whiskers are based on P5 and P95. Within regions plots are sorted by country and year of sampling. Colors of the boxplots refer to the data collection's region (North = violet, South = blue, West = green, East = orange, Israel = dark red). Red lines denote LOQ/LOD for the respective study. Since percentiles are only available and displayed when they are above LOQ/LOD the lower side of boxplots might be truncated. The age categories are shown in capital letters: children of the age groups 3-5 and 6-11 (C), adolescents between 12 and 19 years (T) and adults from the age groups 20-39, 40-59 and 60 years and older (A). The sampling method is indicated in brackets: first morning urine void (mU), spot urine (sU) and 24-hours urine (24hU).

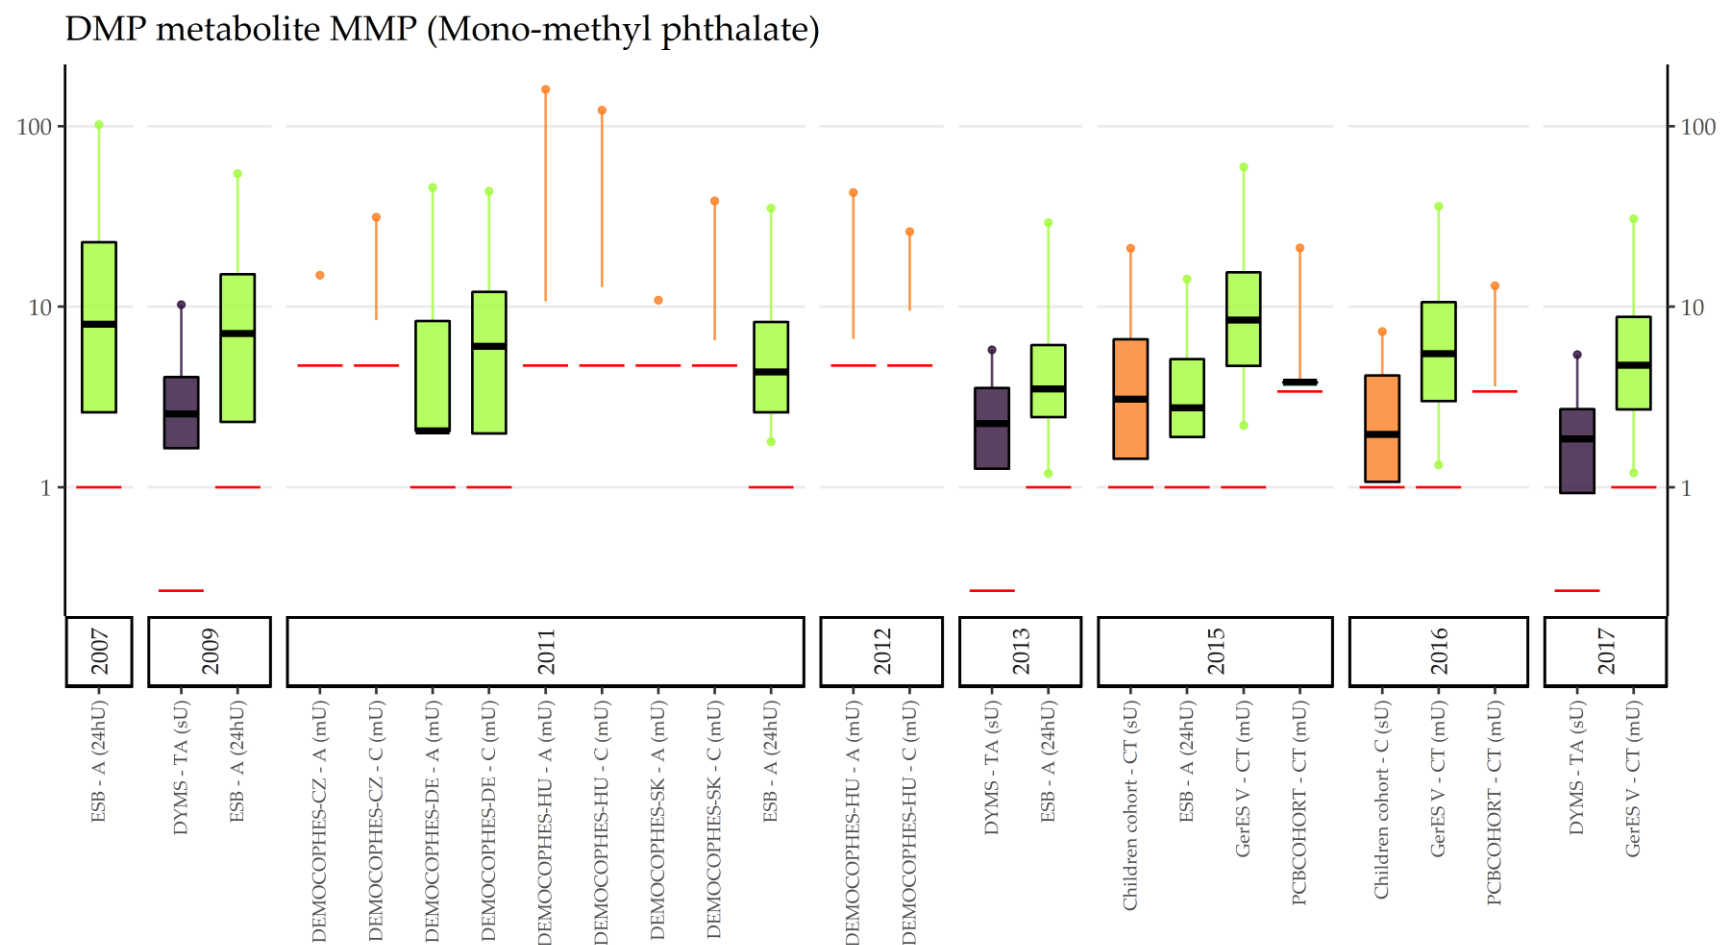

Figure S27. DMP metabolite MMP (Mono-methyl phthalate) concentration in µg/L stratified by sampling year in boxplots.

The box is based on P25, P50, and P75, and the whiskers are based on P5 and P95. Within sampling years plots are sorted by country. Colors of the boxplots refer to the data collection's region (North = violet, South = blue, West = green, East = orange, Israel = dark red). Red lines denote LOQ/LOD for the respective study. Since percentiles are only available and displayed when they are above LOQ/LOD the lower side of boxplots might be truncated. The age categories are shown in capital letters: children of the age groups 3-5 and 6-11 (C), adolescents between 12 and 19 years (T) and adults from the age groups 20-39, 40-59 and 60 years and older (A). The sampling method is indicated in brackets: first morning urine void (mU), spot urine (sU) and 24-hours urine (24hU).

# DMP metabolite MMP (Mono-methyl phthalate)

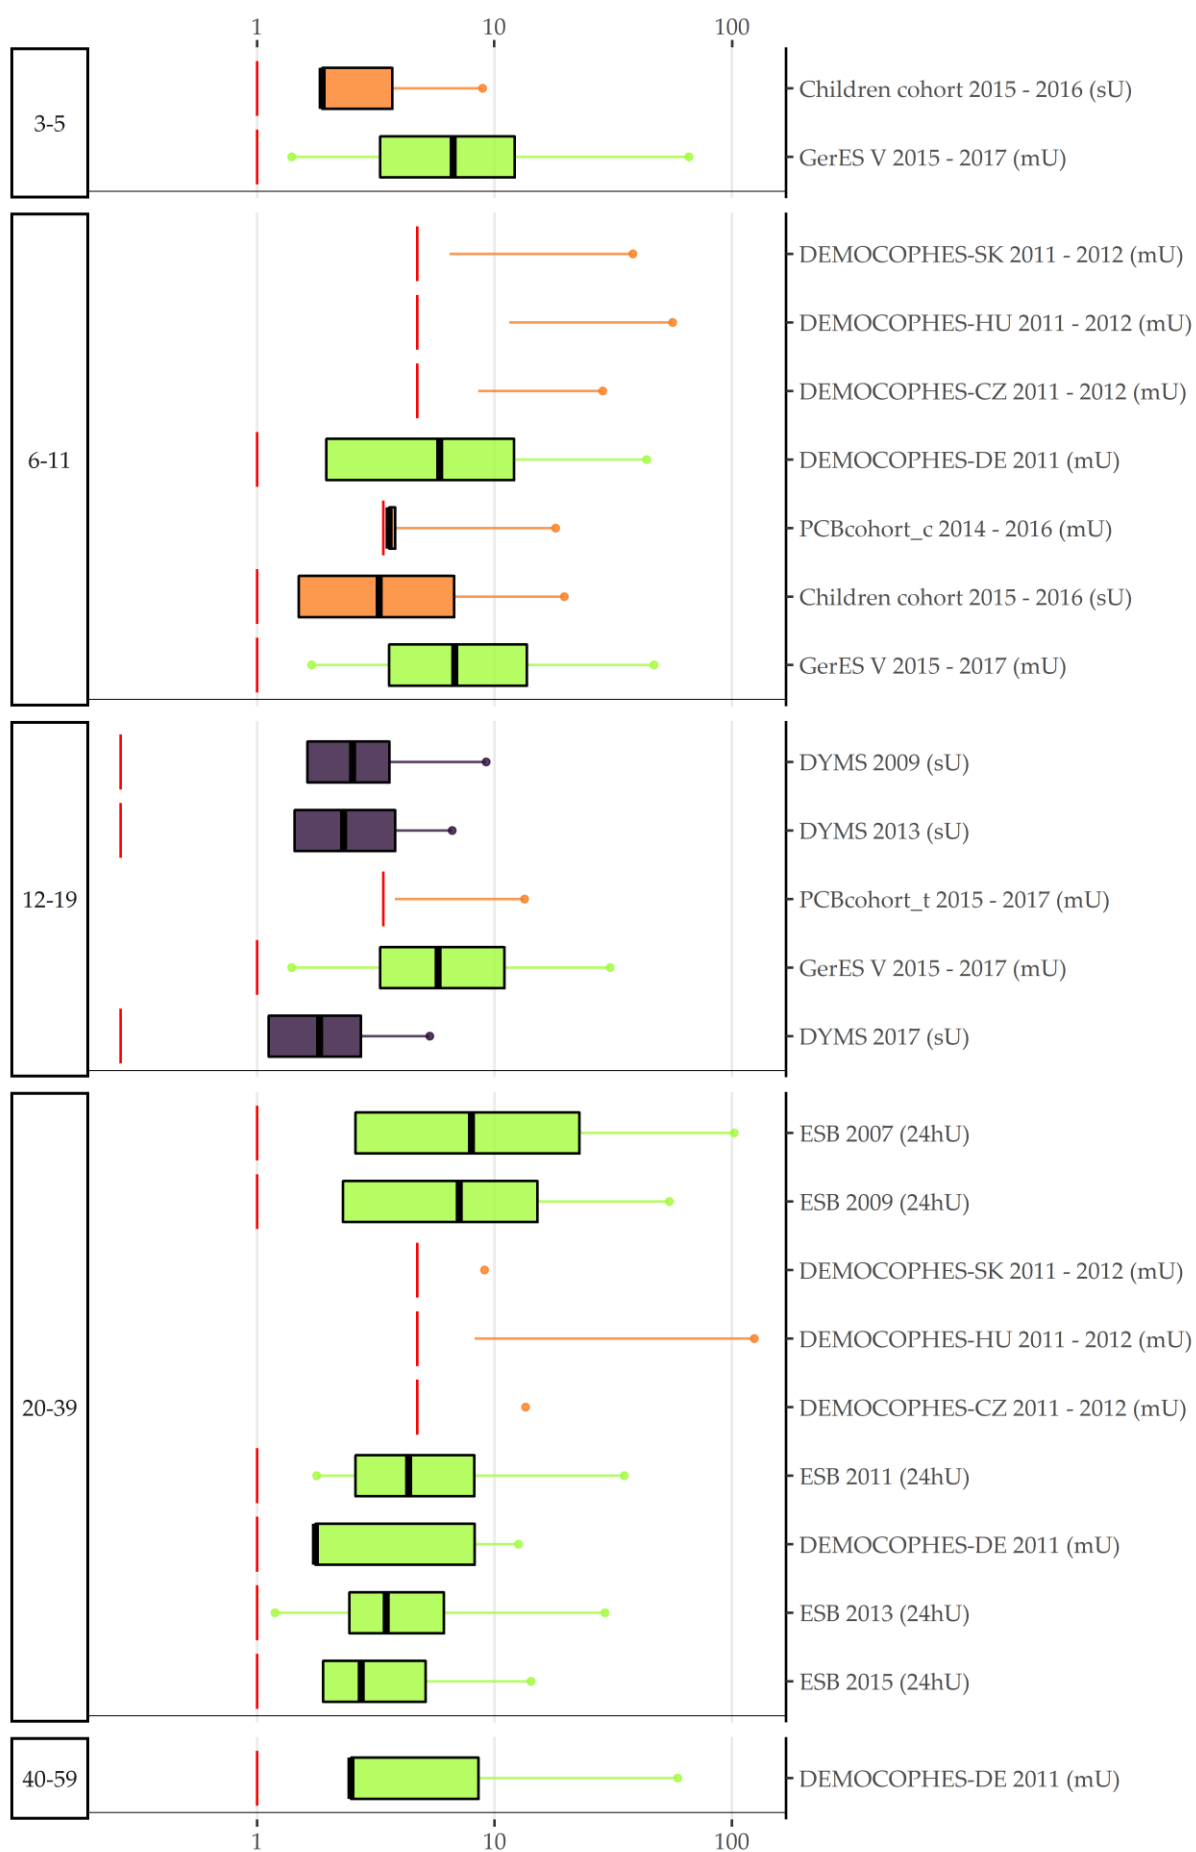

Figure S28. DMP metabolite MMP (Mono-methyl phthalate) concentration in µg/L stratified by age groups in boxplots.

The box is based on P25, P50, and P75, and the whiskers are based on P5 and P95. Within age groups plots are chronologically sorted by year of sampling. Colors of the boxplots refer to the data collection's region (North = violet, South = blue, West = green, East = orange, Israel = dark red). Red lines denote LOQ/LOD for the respective study. Since percentiles are only available and displayed when they are above LOQ/LOD the lower side of boxplots might be truncated. The sampling method is indicated in brackets: first morning urine void (mU), spot urine (sU) and 24-hours urine (24hU).

# Metabolite 3cx-MPP (3-carboxyl-mono-propyl phthalate)

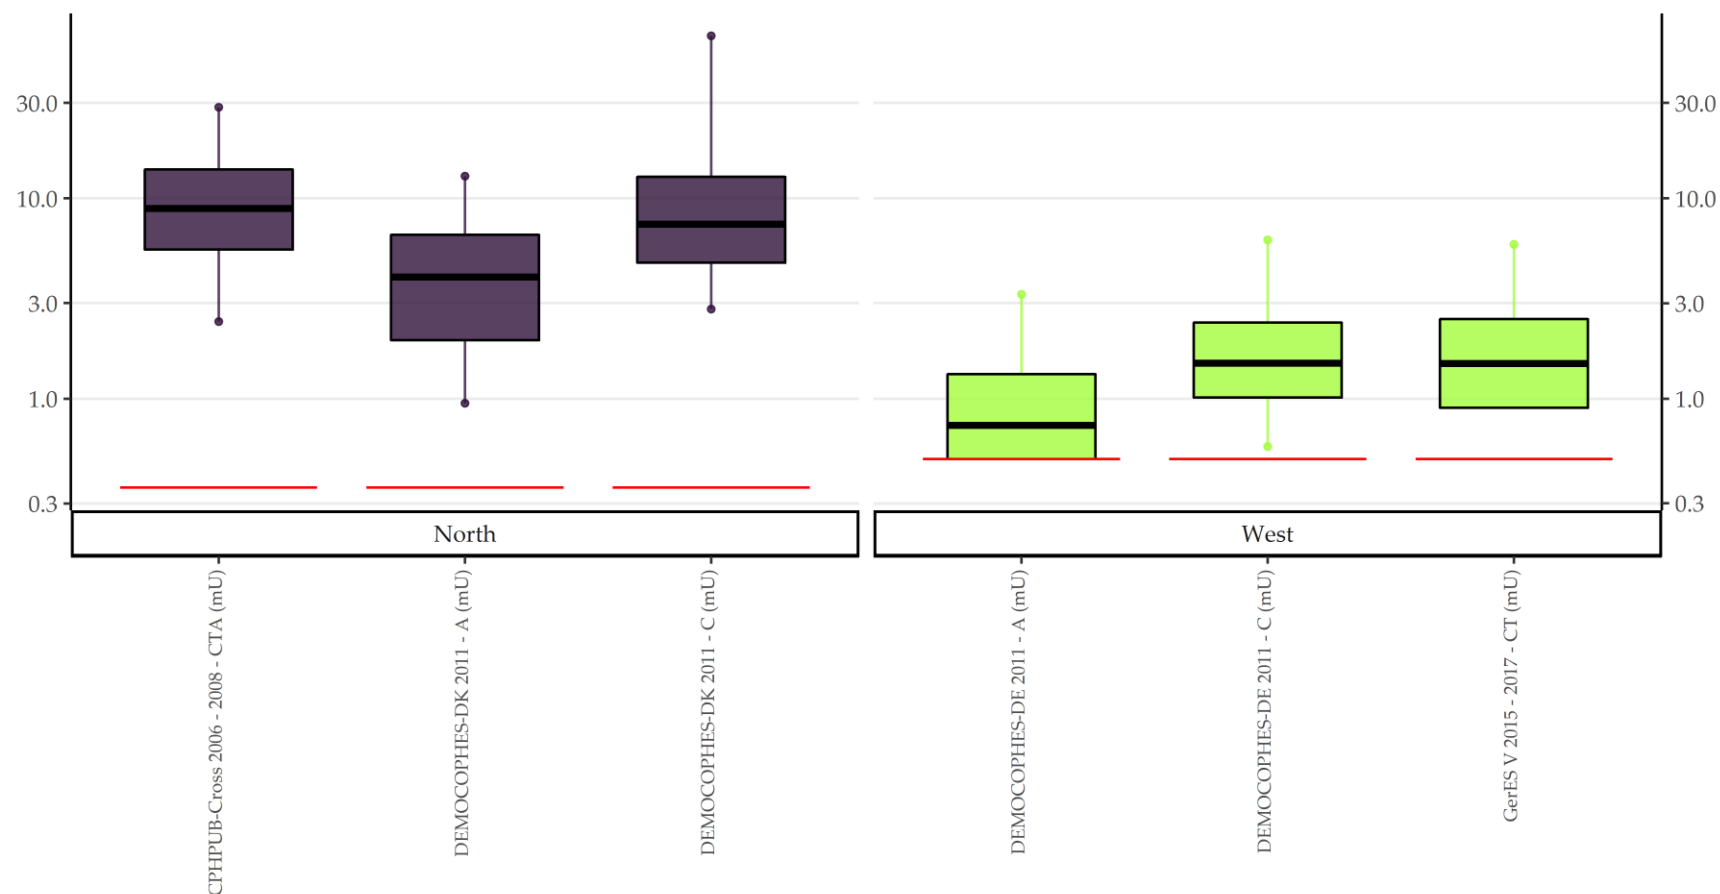

Figure S29. Metabolite 3cx-MPP (3-carboxyl-mono-propyl phthalate) concentration in µg/L stratified by region in boxplots.

The box is based on P25, P50, and P75, and the whiskers are based on P5 and P95. Within regions plots are sorted by country and year of sampling. Colors of the boxplots refer to the data collection's region (North = violet, South = blue, West = green, East = orange, Israel = dark red). Red lines denote LOQ/LOD for the respective study. Since percentiles are only available and displayed when they are above LOQ/LOD the lower side of boxplots might be truncated. The age categories are shown in capital letters: children of the age groups 3-5 and 6-11 (C), adolescents between 12 and 19 years (T) and adults from the age groups 20-39, 40-59 and 60 years and older (A). The sampling method is indicated in brackets: first morning urine void (mU), spot urine (sU) and 24-hours urine (24hU).

# Metabolite 3cx-MPP (3-carboxyl-mono-propyl phthalate)

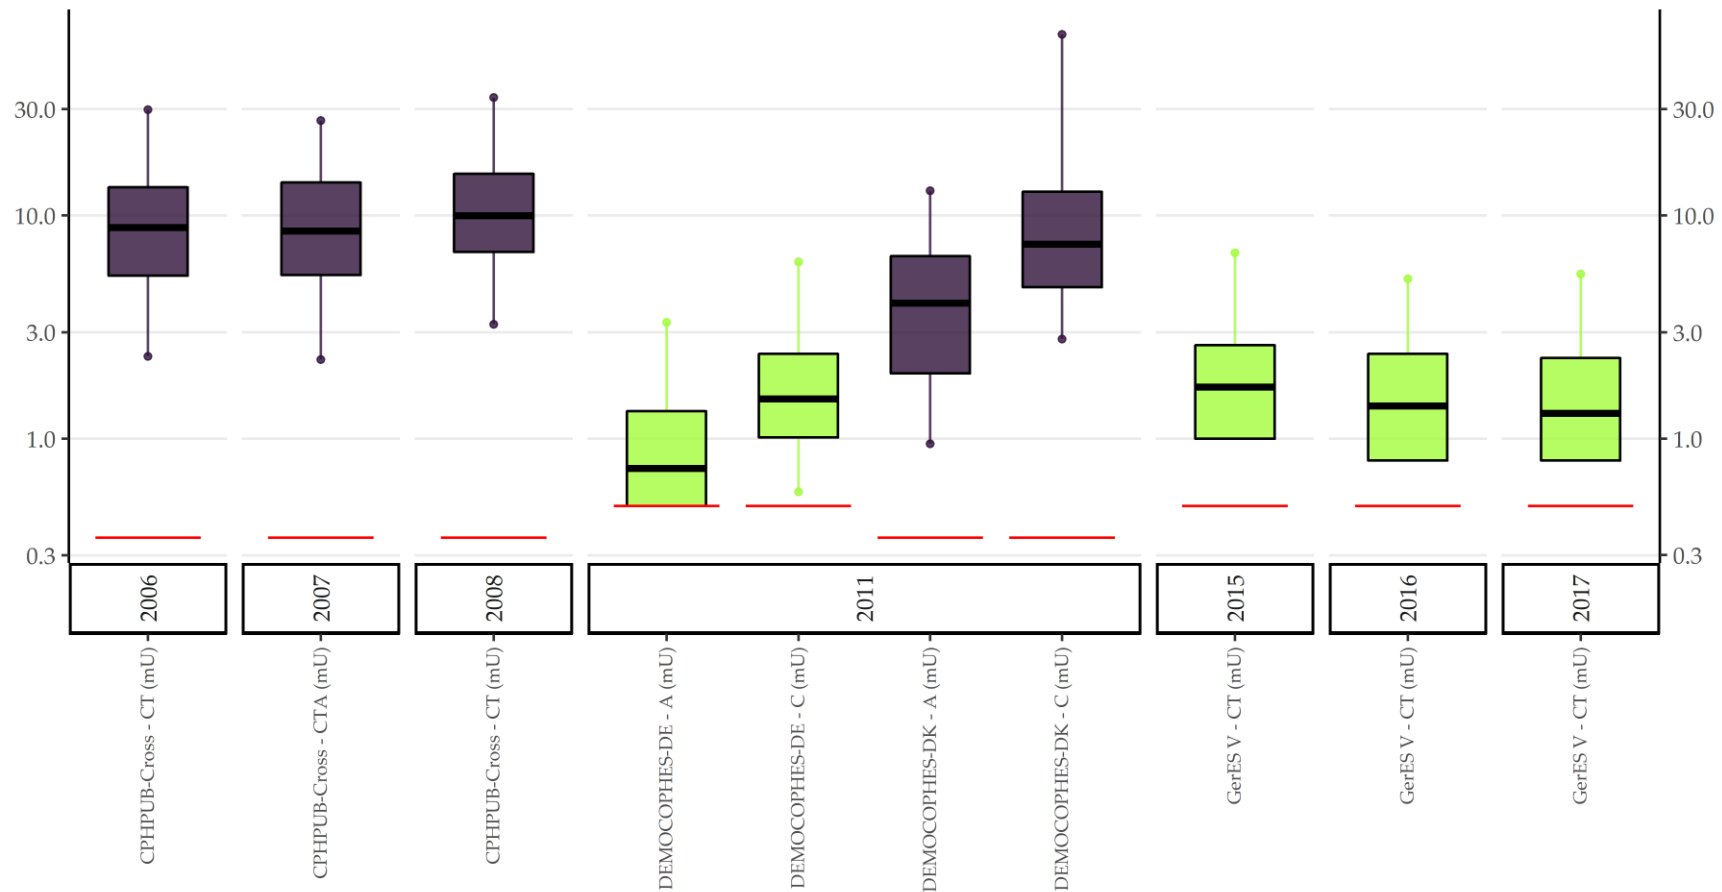

Figure S30. Metabolite 3cx-MPP (3-carboxyl-mono-propyl phthalate) concentration in µg/L stratified by sampling year in boxplots.

The box is based on P25, P50, and P75, and the whiskers are based on P5 and P95. Within sampling years plots are sorted by country. Colors of the boxplots refer to the data collection's region (North = violet, South = blue, West = green, East = orange, Israel = dark red). Red lines denote LOQ/LOD for the respective study. Since percentiles are only available and displayed when they are above LOQ/LOD the lower side of boxplots might be truncated. The age categories are shown in capital letters: children of the age groups 3-5 and 6-11 (C), adolescents between 12 and 19 years (T) and adults from the age groups 20-39, 40-59 and 60 years and older (A). The sampling method is indicated in brackets: first morning urine void (mU), spot urine (sU) and 24-hours urine (24hU).

# Metabolite 3cx-MPP (3-carboxyl-mono-propyl phthalate)

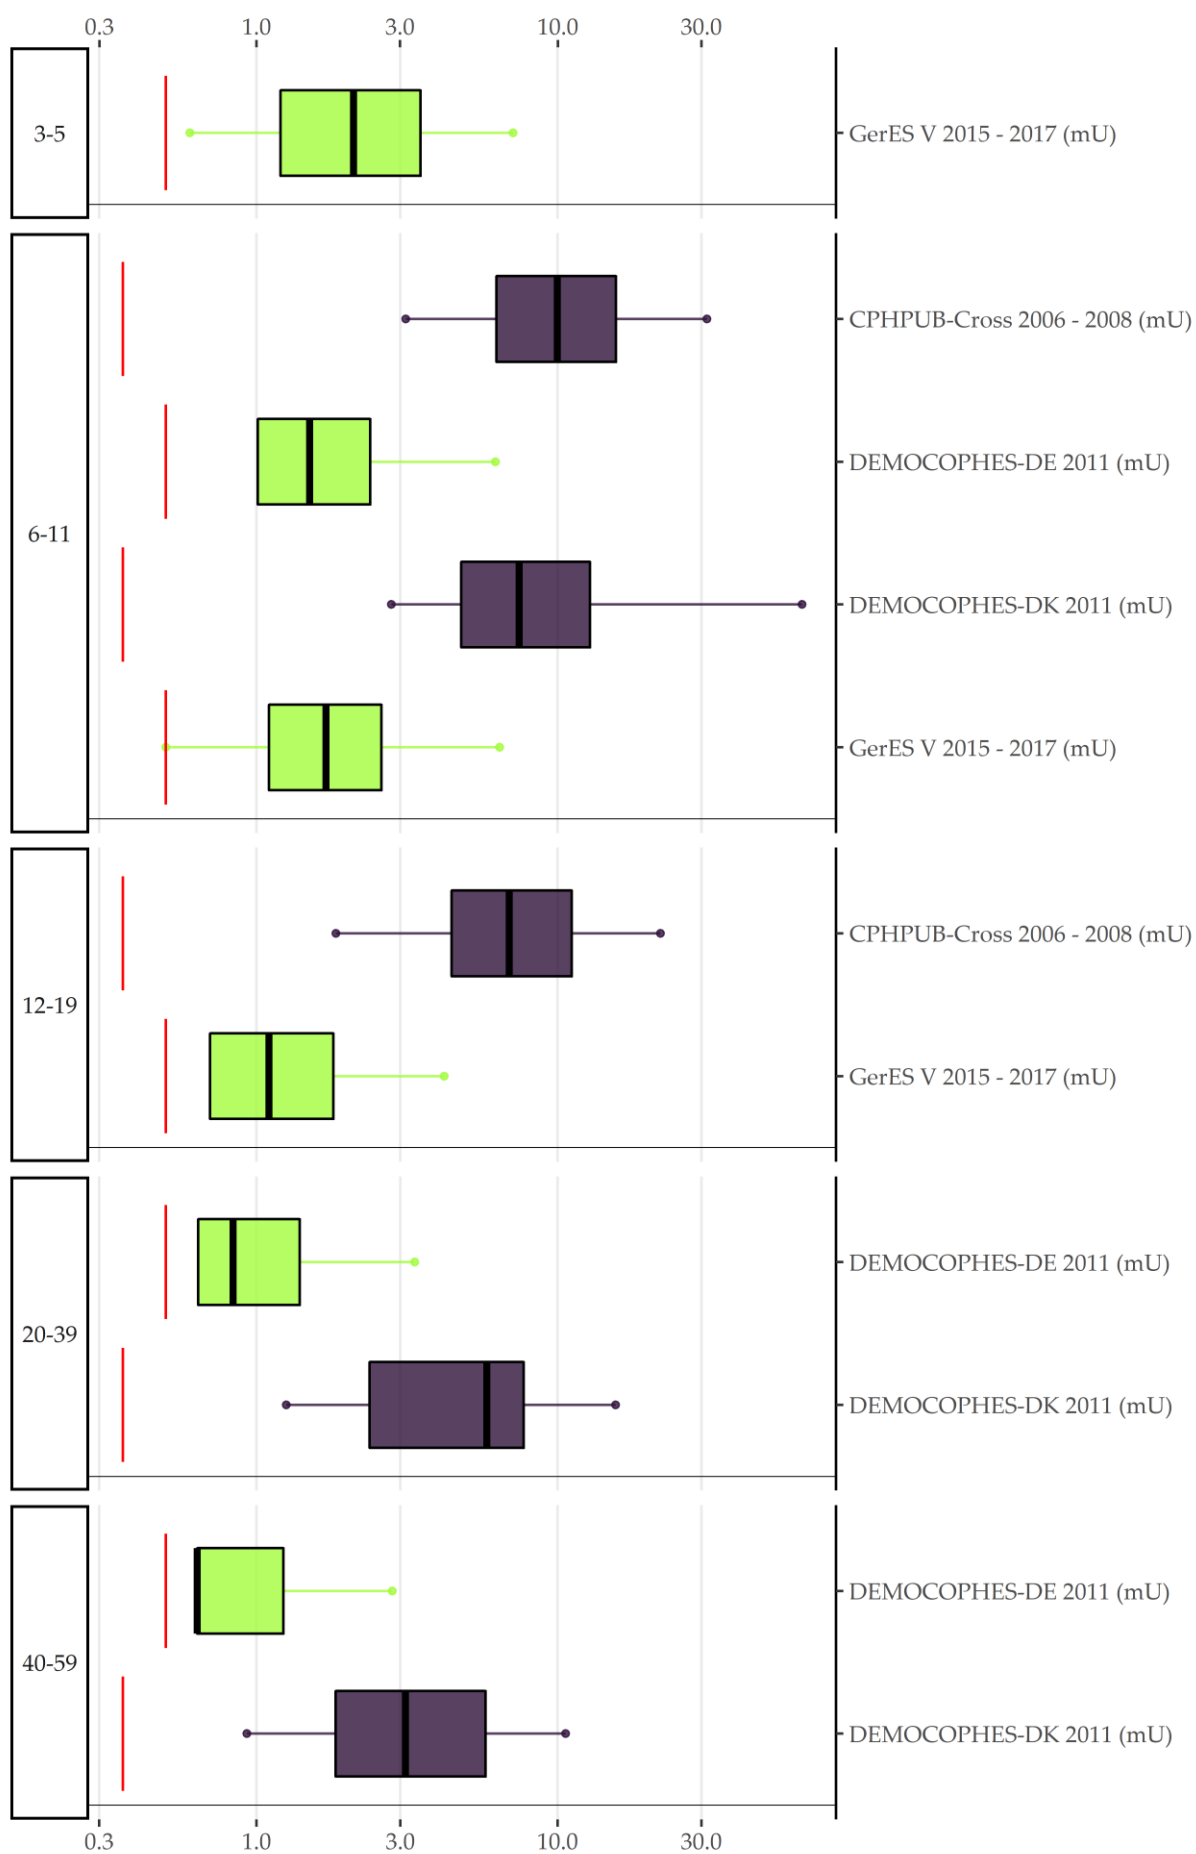

Figure S31. Metabolite 3cx-MPP (3-carboxyl-mono-propyl phthalate) concentration in µg/L stratified by age groups in boxplots.

The box is based on P25, P50, and P75, and the whiskers are based on P5 and P95. Within age groups plots are chronologically sorted by year of sampling. Colors of the boxplots refer to the data collection's region (North = violet, South = blue, West = green, East = orange, Israel = dark red). Red lines denote LOQ/LOD for the respective study. Since percentiles are only available and displayed when they are above LOQ/LOD the lower side of boxplots might be truncated. The sampling method is indicated in brackets: first morning urine void (mU), spot urine (sU) and 24-hours urine (24hU).

# DiNP metabolite cx-MiNP (7-Carboxy-(mono-methyl- heptyl) phthalate)

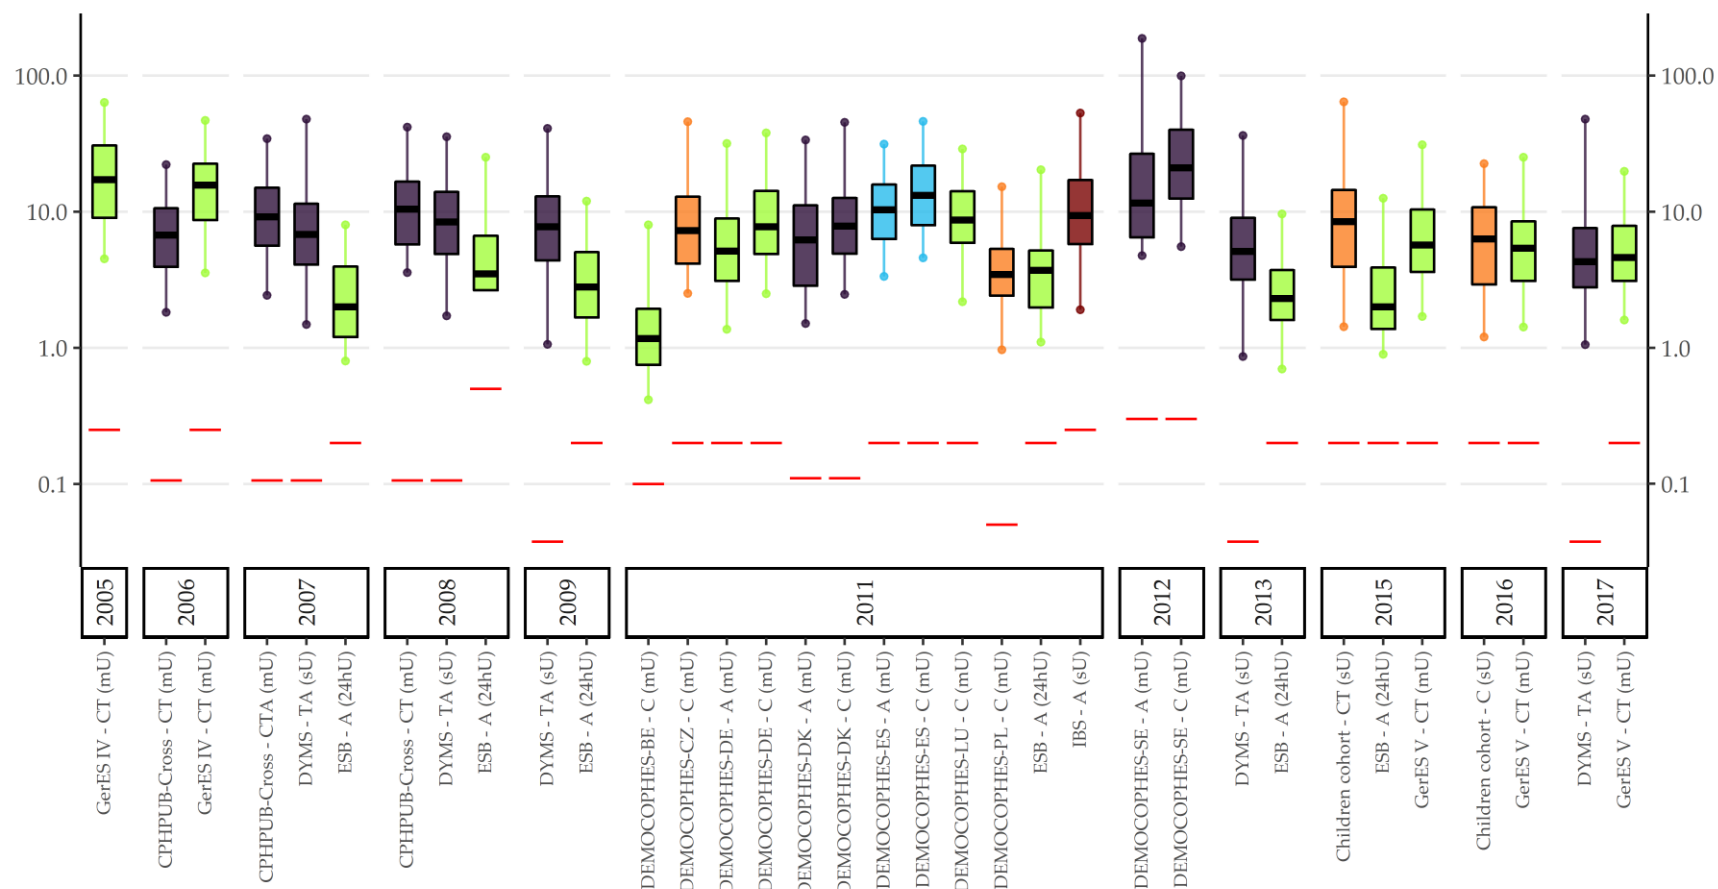

Figure S32. DiNP metabolite cx-MiNP (7-Carboxy-(mono-methyl- heptyl) phthalate) concentration in µg/L stratified by sampling year in boxplots.

The box is based on P25, P50, and P75, and the whiskers are based on P5 and P95. Within sampling years plots are sorted by country. Colors of the boxplots refer to the data collection's region (North = violet, South = blue, West = green, East = orange, Israel = dark red). Red lines denote LOQ/LOD for the respective study. Since percentiles are only available and displayed when they are above LOQ/LOD the lower side of boxplots might be truncated. The age categories are shown in capital letters: children of the age groups 3-5 and 6-11 (C), adolescents between 12 and 19 years (T) and adults from the age groups 20-39, 40-59 and 60 years and older (A). The sampling method is indicated in brackets: first morning urine void (mU), spot urine (sU) and 24-hours urine (24hU).

# DiNP metabolite cx-MiNP (7-Carboxy-(mono-methyl- heptyl) phthalate)

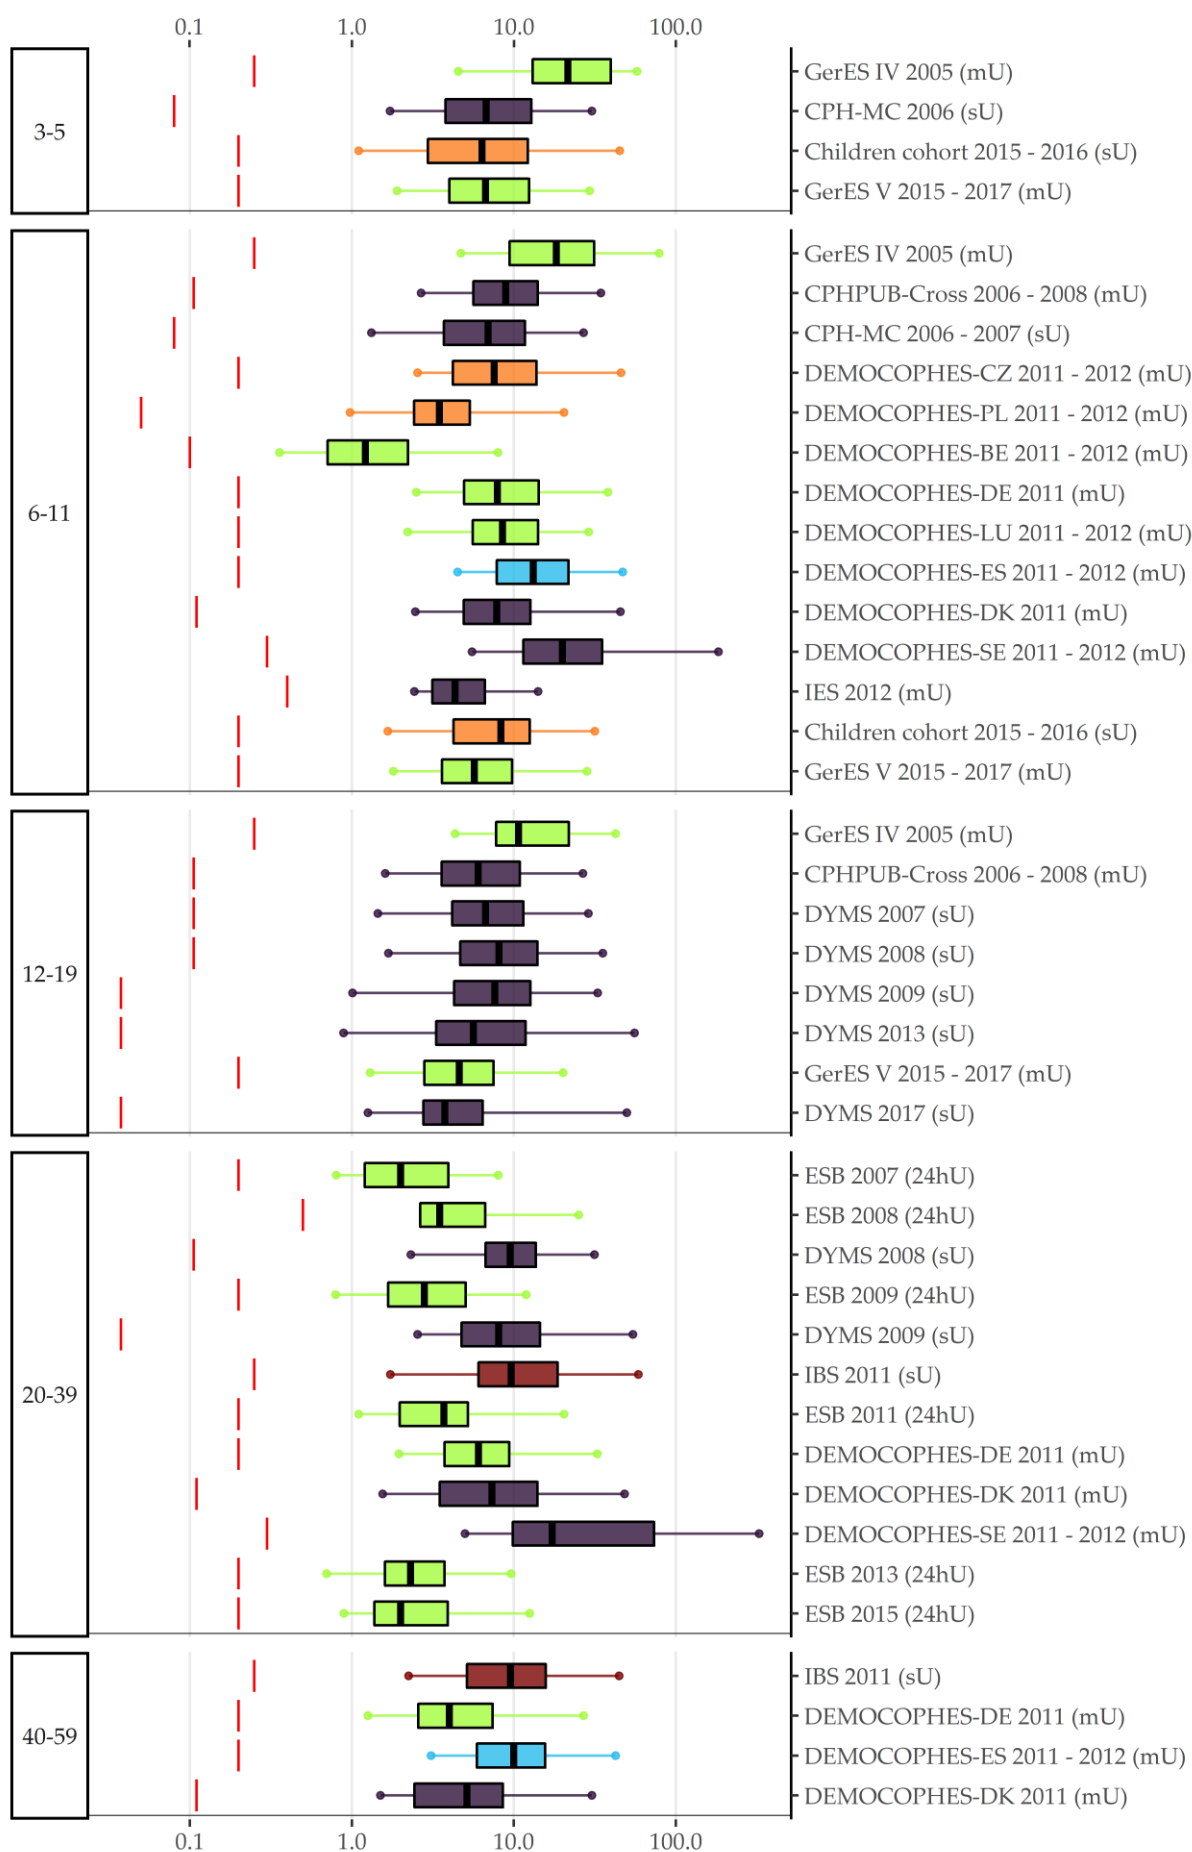

Figure S33. DiNP metabolite cx-MiNP (7-Carboxy-(mono-methyl- heptyl) phthalate) concentration in µg/L stratified by age groups in boxplots.

The box is based on P25, P50, and P75, and the whiskers are based on P5 and P95. Within age groups plots are chronologically sorted by year of sampling. Colors of the boxplots refer to the data collection's region (North = violet, South = blue, West = green, East = orange, Israel = dark red). Red lines denote LOQ/LOD for the respective study. Since percentiles are only available and displayed when they are above LOQ/LOD the lower side of boxplots might be truncated. The sampling method is indicated in brackets: first morning urine void (mU), spot urine (sU) and 24-hours urine (24hU).

# DiNP metabolite OH-MiNP (7-OH-(Mono-methyl-octyl) phthalate)

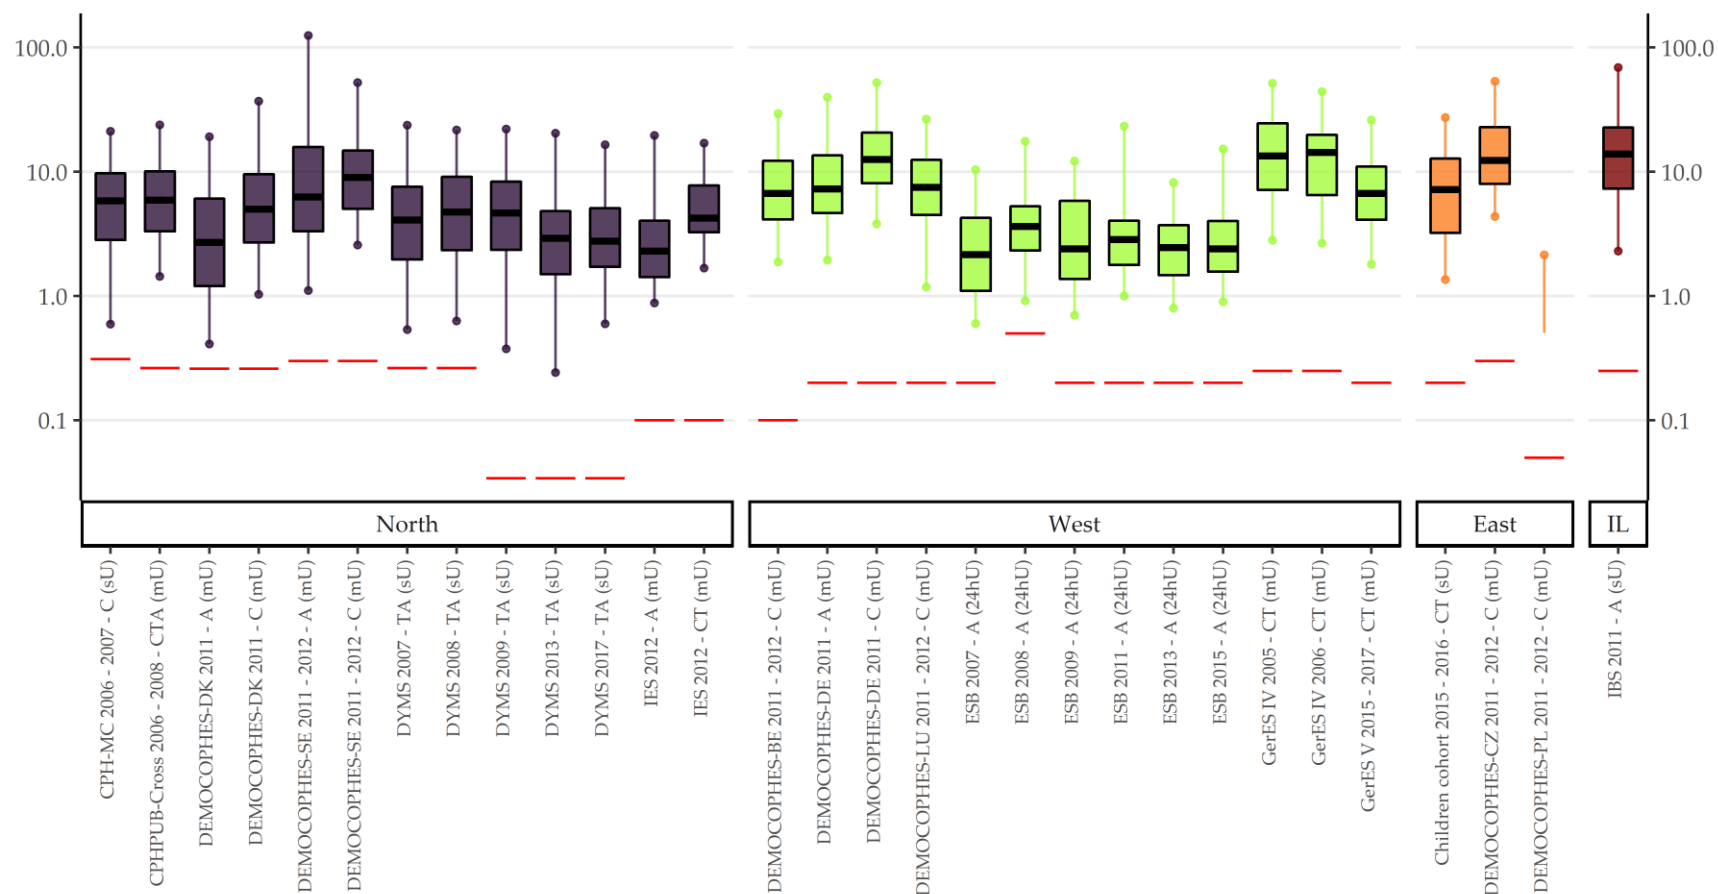

Figure S34. DiNP metabolite OH-MiNP (7-OH-(Mono-methyl-octyl) phthalate) concentration in µg/L stratified by region in boxplots.

The box is based on P25, P50, and P75, and the whiskers are based on P5 and P95. Within regions plots are sorted by country and year of sampling. Colors of the boxplots refer to the data collection's region (North = violet, South = blue, West = green, East = orange, Israel = dark red). Red lines denote LOQ/LOD for the respective study. Since percentiles are only available and displayed when they are above LOQ/LOD the lower side of boxplots might be truncated. The age categories are shown in capital letters: children of the age groups 3-5 and 6-11 (C), adolescents between 12 and 19 years (T) and adults from the age groups 20-39, 40-59 and 60 years and older (A). The sampling method is indicated in brackets: first morning urine void (mU), spot urine (sU) and 24-hours urine (24hU).

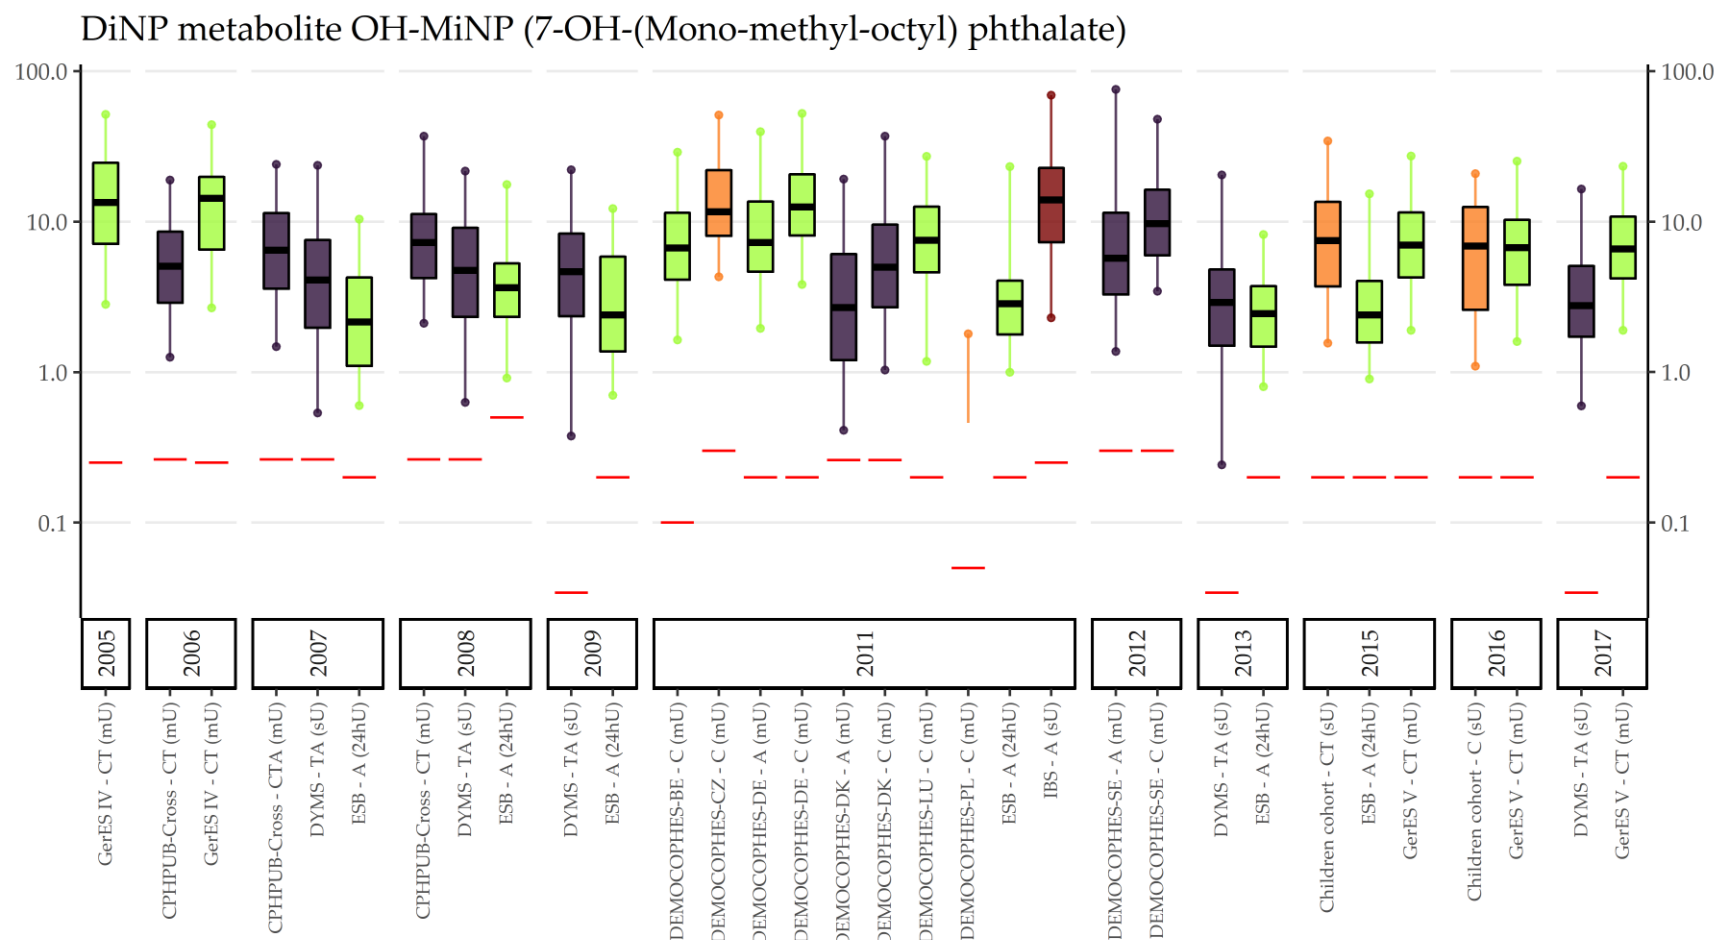

Figure S35. DiNP metabolite OH-MiNP (7-OH-(Mono-methyl-octyl) phthalate) concentration in µg/L stratified by sampling year in boxplots.

The box is based on P25, P50, and P75, and the whiskers are based on P5 and P95. Within sampling years plots are sorted by country. Colors of the boxplots refer to the data collection's region (North = violet, South = blue, West = green, East = orange, Israel = dark red). Red lines denote LOQ/LOD for the respective study. Since percentiles are only available and displayed when they are above LOQ/LOD the lower side of boxplots might be truncated. The age categories are shown in capital letters: children of the age groups 3-5 and 6-11 (C), adolescents between 12 and 19 years (T) and adults from the age groups 20-39, 40-59 and 60 years and older (A). The sampling method is indicated in brackets: first morning urine void (mU), spot urine (sU) and 24-hours urine (24hU).

# DiNP metabolite OH-MiNP (7-OH-(Mono-methyl-octyl) phthalate)

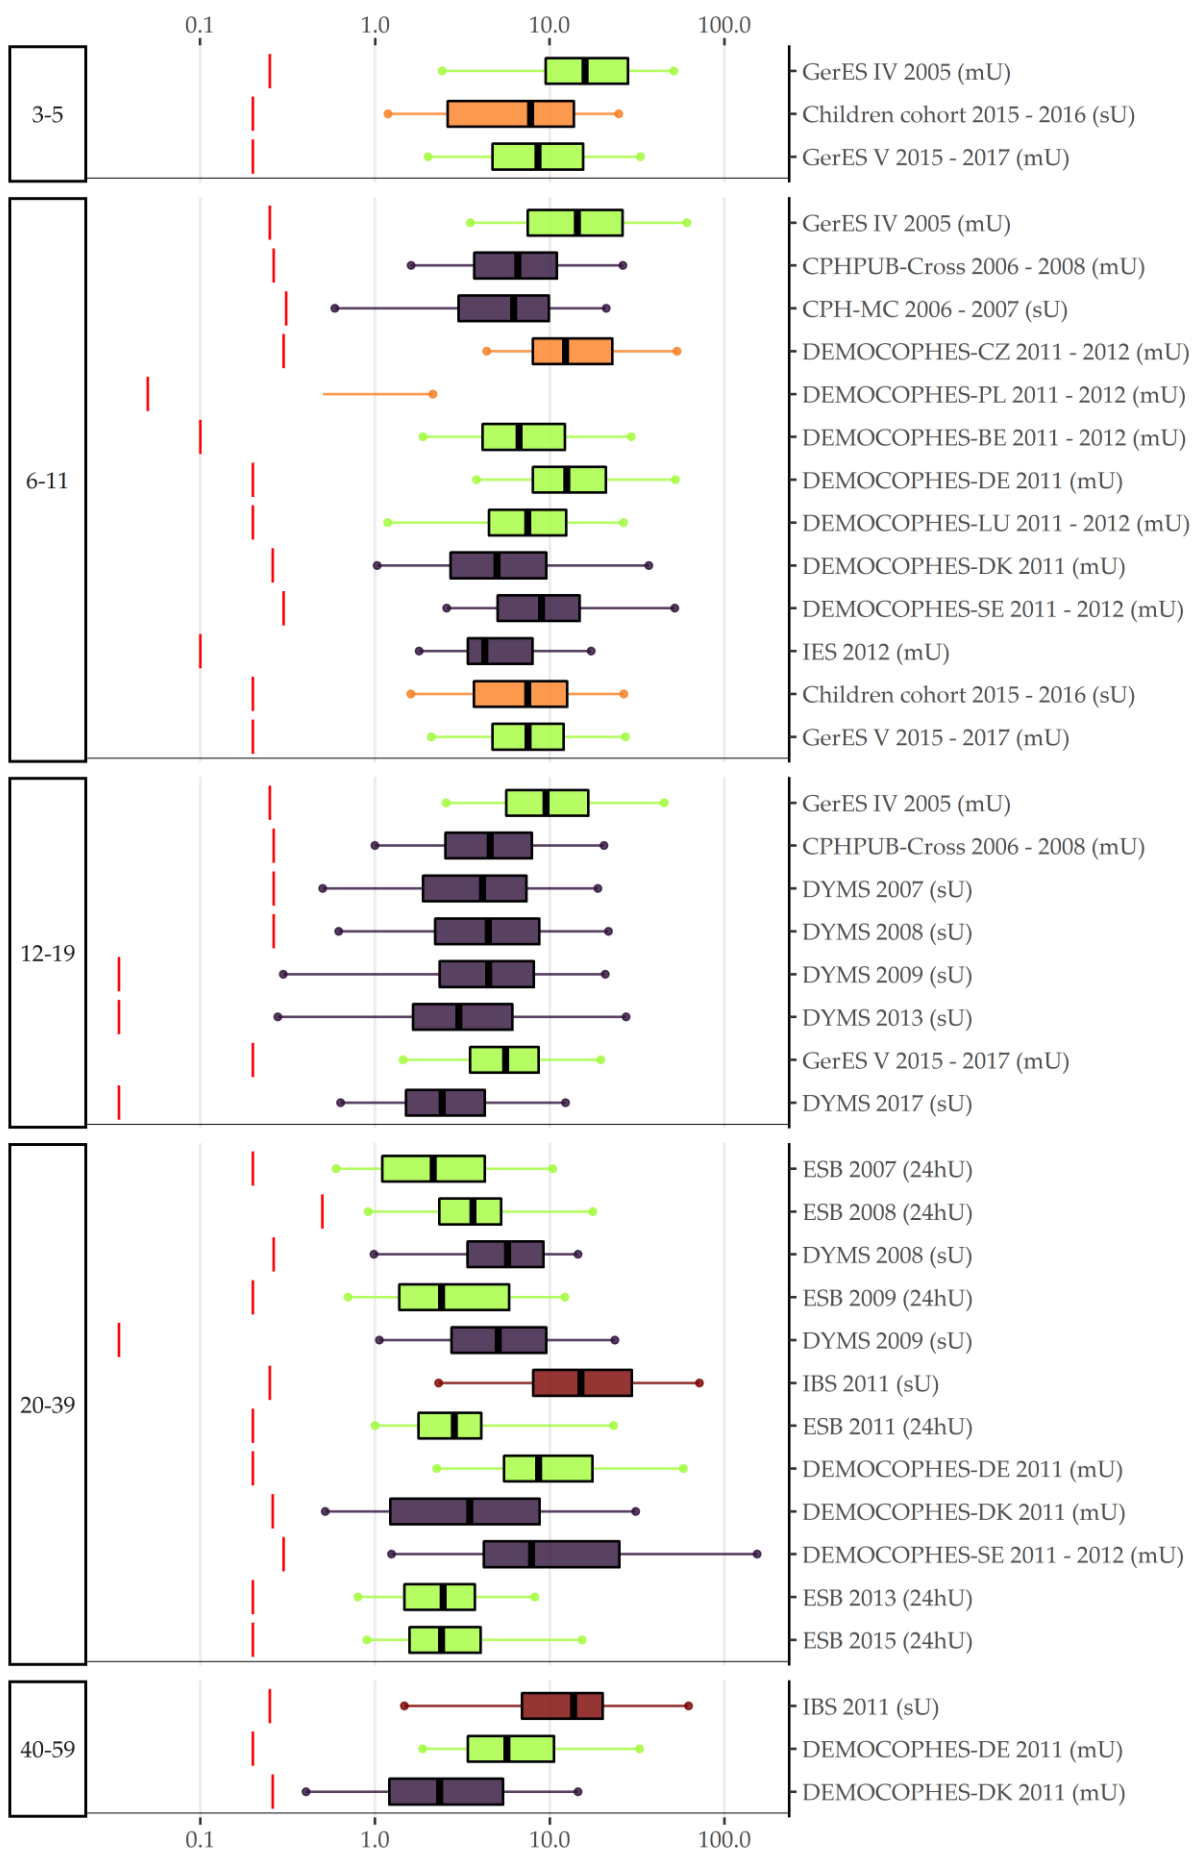

Figure S36. DiNP metabolite OH-MiNP (7-OH-(Mono-methyl-octyl) phthalate) concentration in µg/L stratified by age groups in boxplots.

The box is based on P25, P50, and P75, and the whiskers are based on P5 and P95. Within age groups plots are chronologically sorted by year of sampling. Colors of the boxplots refer to the data collection's region (North = violet, South = blue, West = green, East = orange, Israel = dark red). Red lines denote LOQ/LOD for the respective study. Since percentiles are only available and displayed when they are above LOQ/LOD the lower side of boxplots might be truncated. The sampling method is indicated in brackets: first morning urine void (mU), spot urine (sU) and 24-hours urine (24hU).

# DiNP metabolite oxo-MiNP (7-Oxo-(Mono-methyl-octyl) phthalate)

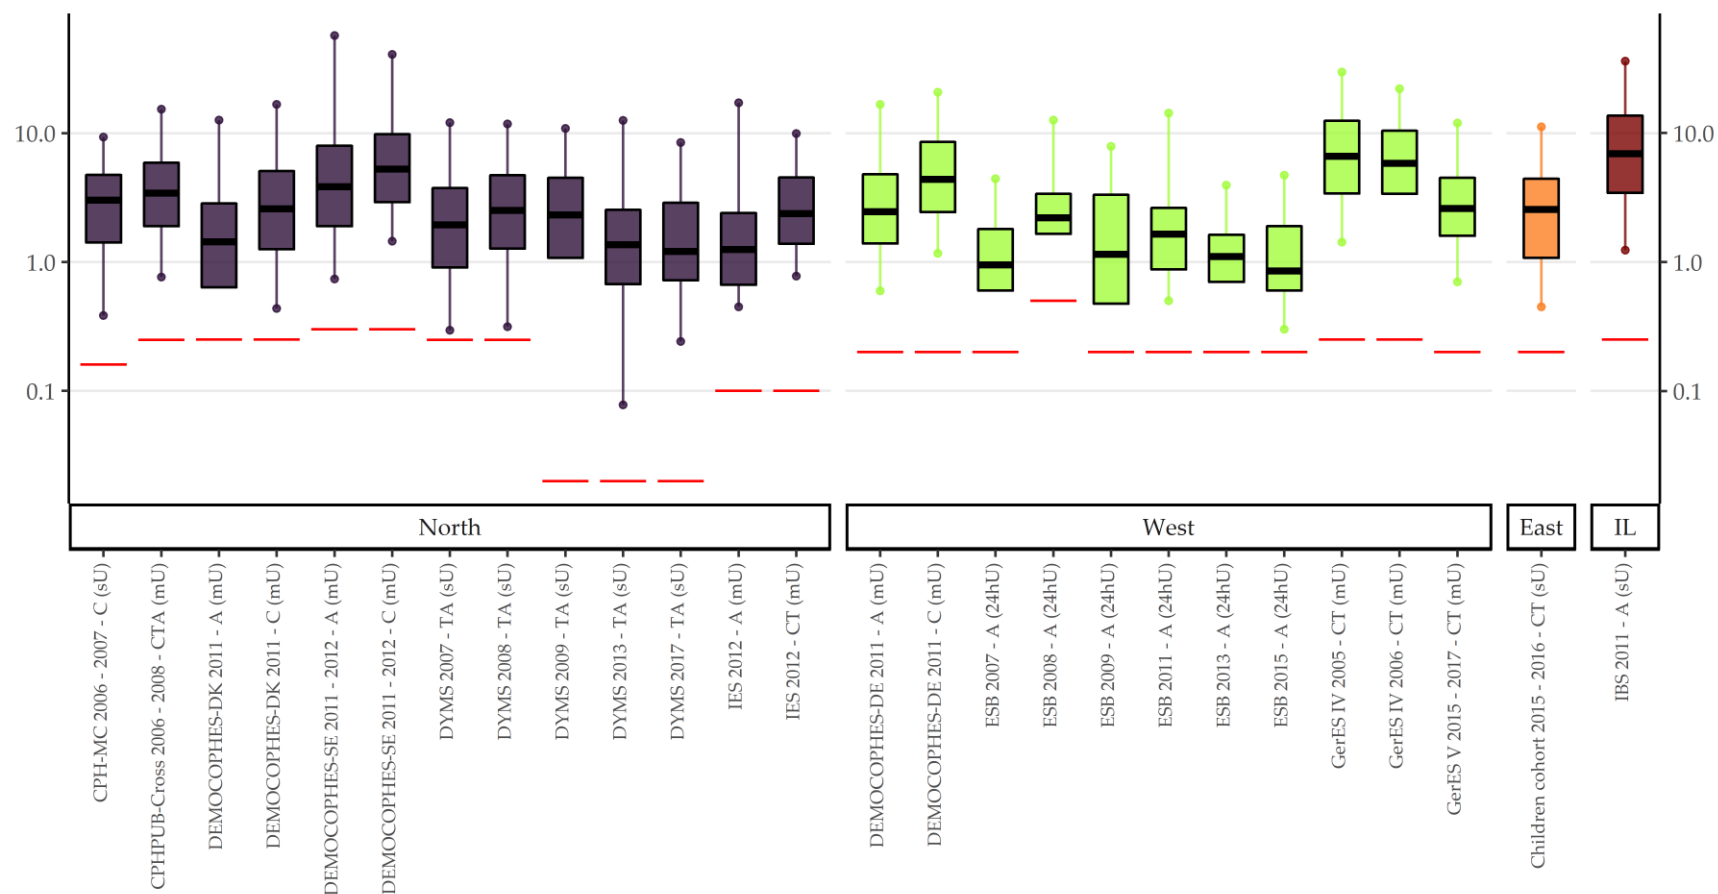

Figure S37. DiNP metabolite oxo-MiNP (7-Oxo-(Mono-methyl-octyl) phthalate) concentration in µg/L stratified by region in boxplots.

The box is based on P25, P50, and P75, and the whiskers are based on P5 and P95. Within regions plots are sorted by country and year of sampling. Colors of the boxplots refer to the data collection's region (North = violet, South = blue, West = green, East = orange, Israel = dark red). Red lines denote LOQ/LOD for the respective study. Since percentiles are only available and displayed when they are above LOQ/LOD the lower side of boxplots might be truncated. The age categories are shown in capital letters: children of the age groups 3-5 and 6-11 (C), adolescents between 12 and 19 years (T) and adults from the age groups 20-39, 40-59 and 60 years and older (A). The sampling method is indicated in brackets: first morning urine void (mU), spot urine (sU) and 24-hours urine (24hU).

# DiNP metabolite oxo-MiNP (7-Oxo-(Mono-methyl-octyl) phthalate)

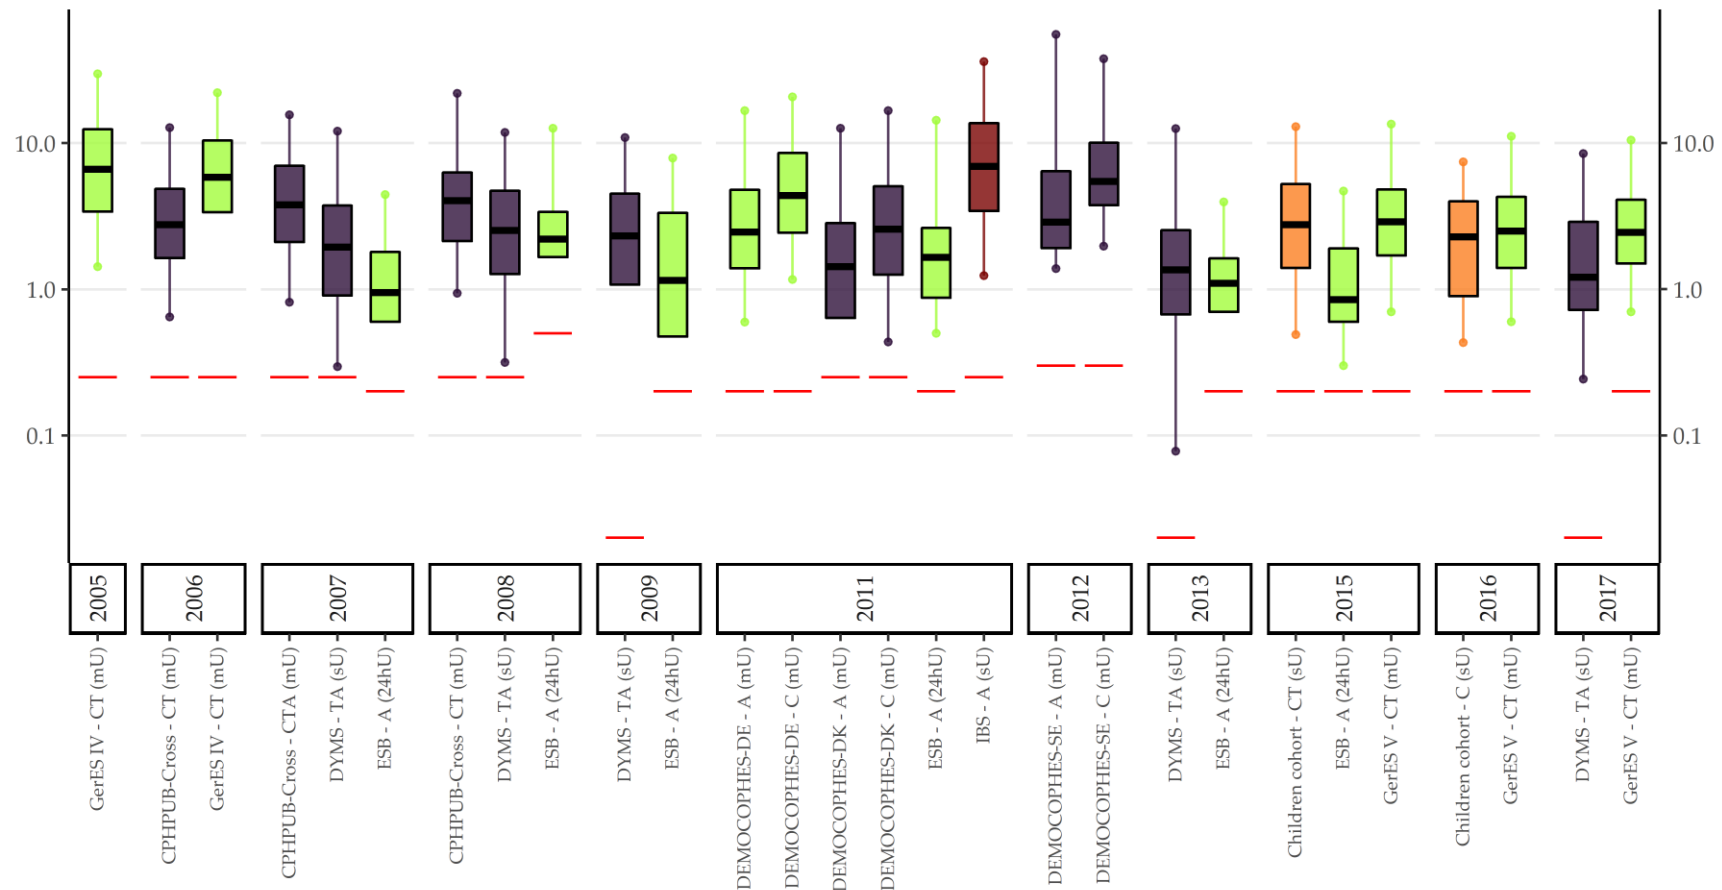

Figure S38. DiNP metabolite oxo-MiNP (7-Oxo-(Mono-methyl-octyl) phthalate) concentration in µg/L stratified by sampling year in boxplots.

The box is based on P25, P50, and P75, and the whiskers are based on P5 and P95. Within sampling years plots are sorted by country. Colors of the boxplots refer to the data collection's region (North = violet, South = blue, West = green, East = orange, Israel = dark red). Red lines denote LOQ/LOD for the respective study. Since percentiles are only available and displayed when they are above LOQ/LOD the lower side of boxplots might be truncated. The age categories are shown in capital letters: children of the age groups 3-5 and 6-11 (C), adolescents between 12 and 19 years (T) and adults from the age groups 20-39, 40-59 and 60 years and older (A). The sampling method is indicated in brackets: first morning urine void (mU), spot urine (sU) and 24-hours urine (24hU).

# DiNP metabolite oxo-MiNP (7-Oxo-(Mono-methyl-octyl) phthalate)

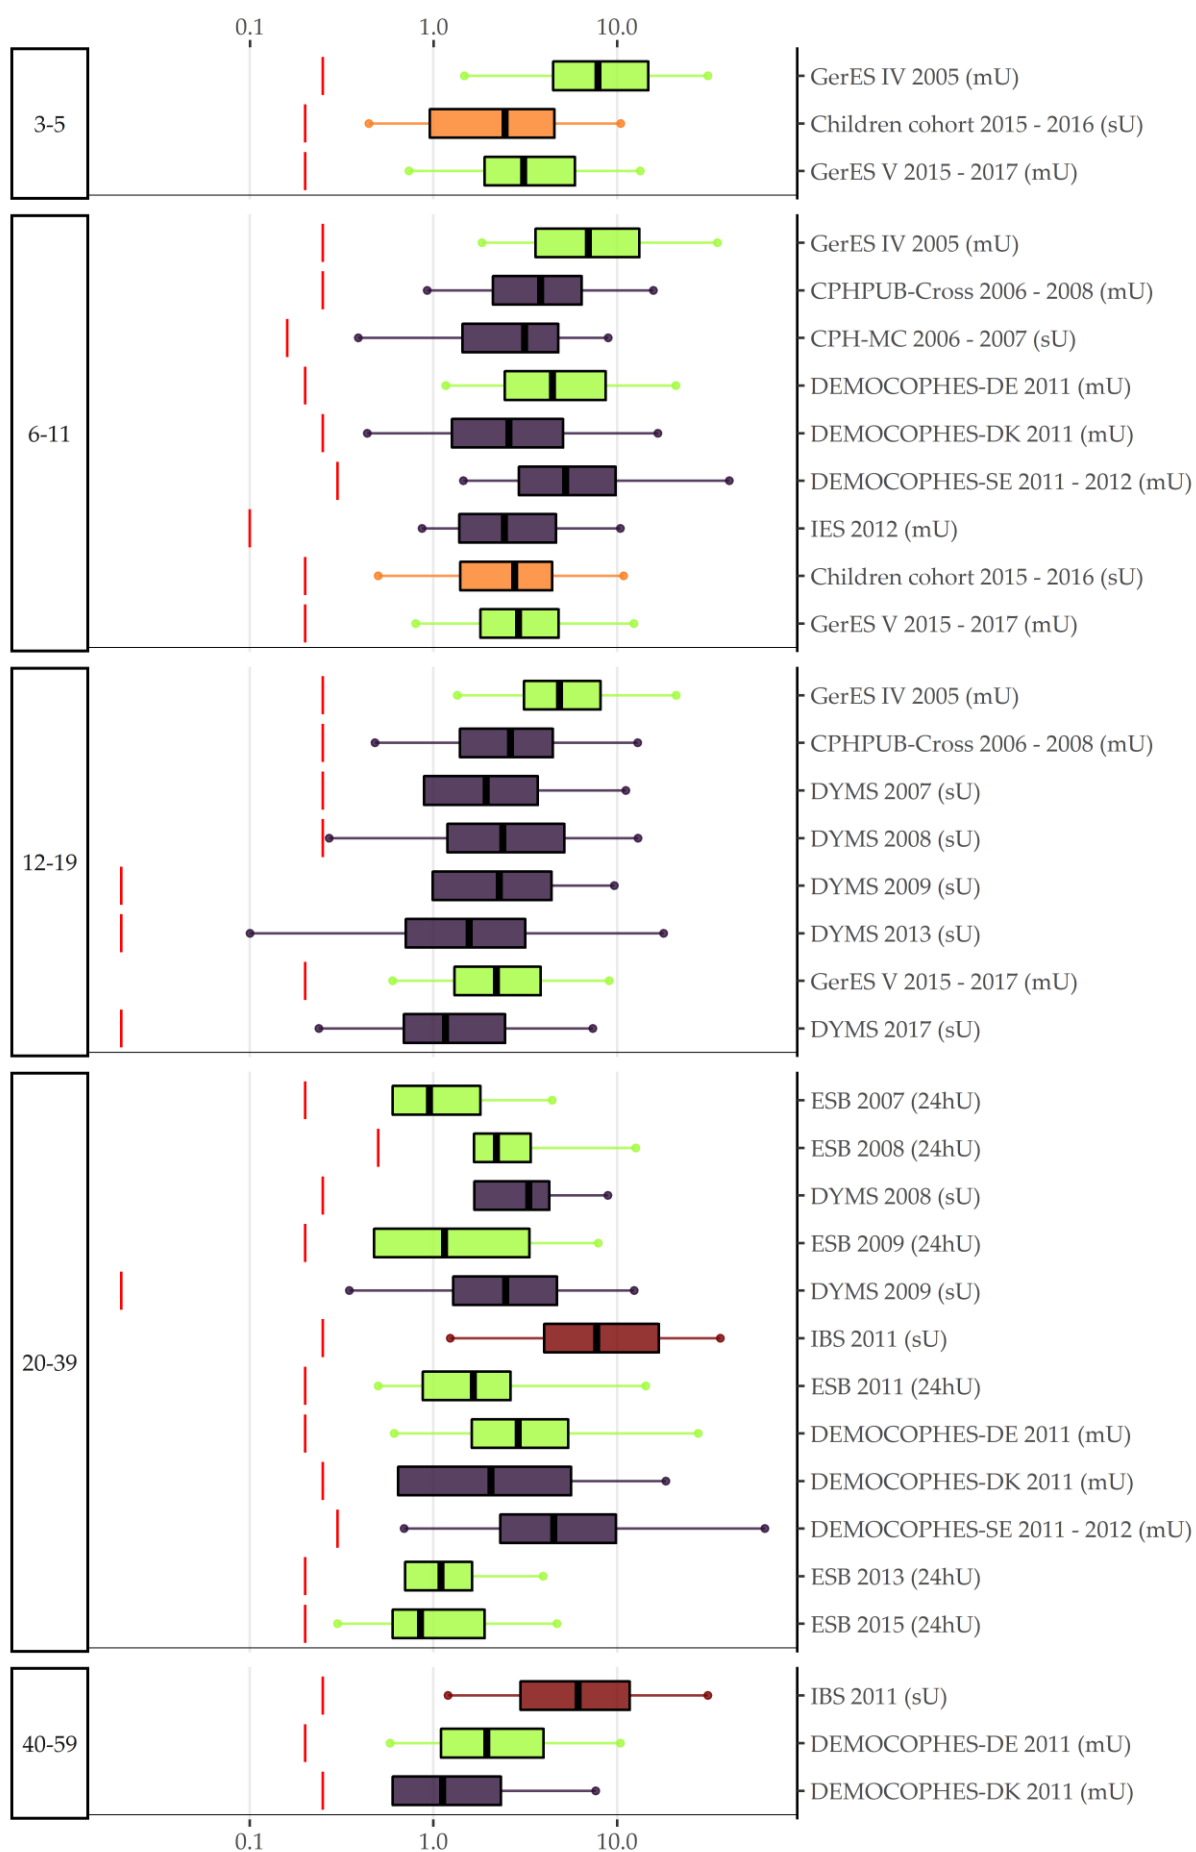

Figure S39. DiNP metabolite oxo-MiNP (7-Oxo-(Mono-methyl-octyl) phthalate) concentration in µg/L stratified by age groups in boxplots.

The box is based on P25, P50, and P75, and the whiskers are based on P5 and P95. Within age groups plots are chronologically sorted by year of sampling. Colors of the boxplots refer to the data collection's region (North = violet, South = blue, West = green, East = orange, Israel = dark red). Red lines denote LOQ/LOD for the respective study. Since percentiles are only available and displayed when they are above LOQ/LOD the lower side of boxplots might be truncated. The sampling method is indicated in brackets: first morning urine void (mU), spot urine (sU) and 24-hours urine (24hU).

# DiDP metabolite cx-MiDP (Mono(2,7-methyl-7- carboxy-heptyl) phthalate)

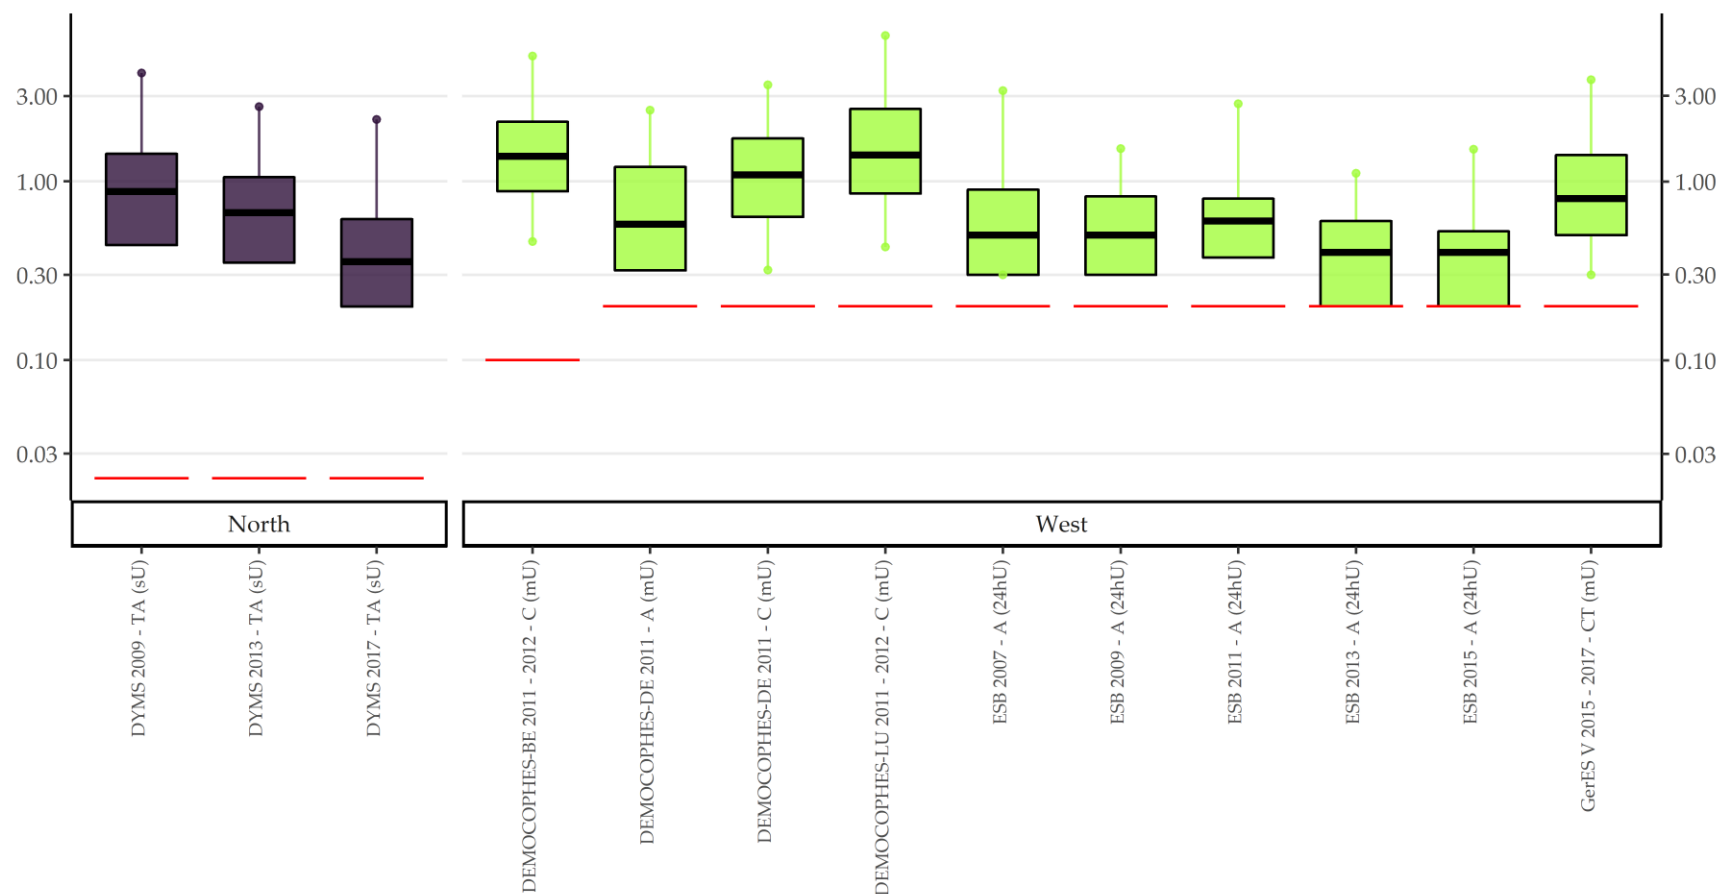

Figure S40. DiDP metabolite cx-MiDP (Mono(2,7-methyl-7- carboxy-heptyl) phthalate) concentration in µg/L stratified by region in boxplots.

The box is based on P25, P50, and P75, and the whiskers are based on P5 and P95. Within regions plots are sorted by country and year of sampling. Colors of the boxplots refer to the data collection's region (North = violet, South = blue, West = green, East = orange, Israel = dark red). Red lines denote LOQ/LOD for the respective study. Since percentiles are only available and displayed when they are above LOQ/LOD the lower side of boxplots might be truncated. The age categories are shown in capital letters: children of the age groups 3-5 and 6-11 (C), adolescents between 12 and 19 years (T) and adults from the age groups 20-39, 40-59 and 60 years and older (A). The sampling method is indicated in brackets: first morning urine void (mU), spot urine (sU) and 24-hours urine (24hU).

# DiDP metabolite cx-MiDP (Mono(2,7-methyl-7- carboxy-heptyl) phthalate)

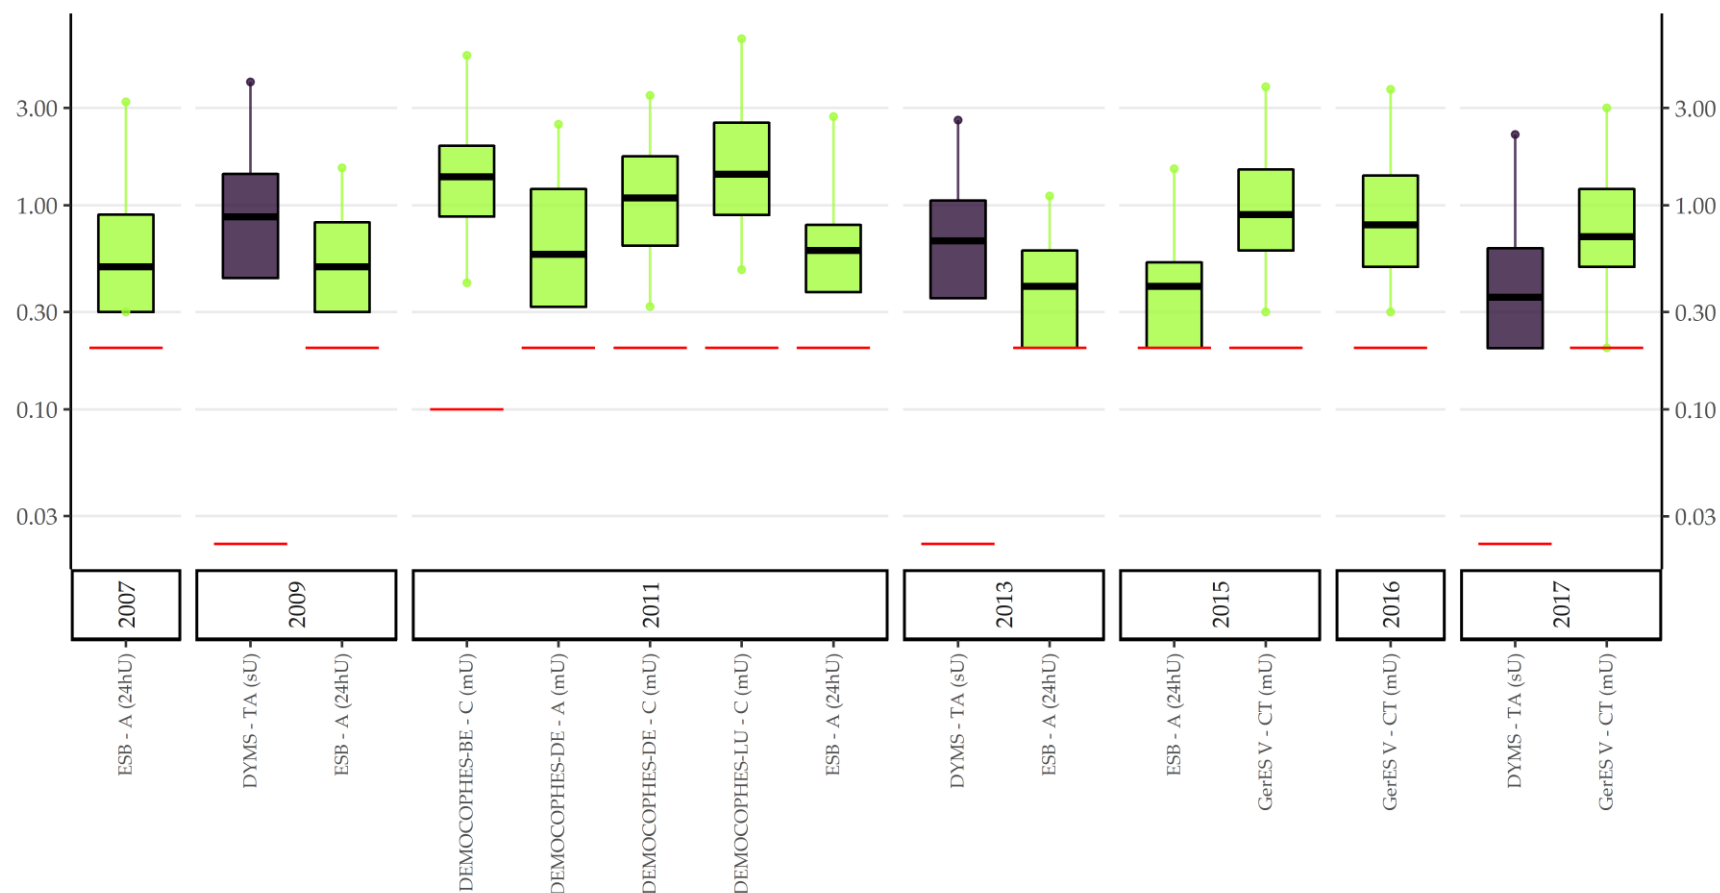

Figure S41. DiDP metabolite cx-MiDP (Mono(2,7-methyl-7- carboxy-heptyl) phthalate) concentration in µg/L stratified by sampling year in boxplots.

The box is based on P25, P50, and P75, and the whiskers are based on P5 and P95. Within sampling years plots are sorted by country. Colors of the boxplots refer to the data collection's region (North = violet, South = blue, West = green, East = orange, Israel = dark red). Red lines denote LOQ/LOD for the respective study. Since percentiles are only available and displayed when they are above LOQ/LOD the lower side of boxplots might be truncated. The age categories are shown in capital letters: children of the age groups 3-5 and 6-11 (C), adolescents between 12 and 19 years (T) and adults from the age groups 20-39, 40-59 and 60 years and older (A). The sampling method is indicated in brackets: first morning urine void (mU), spot urine (sU) and 24-hours urine (24hU).

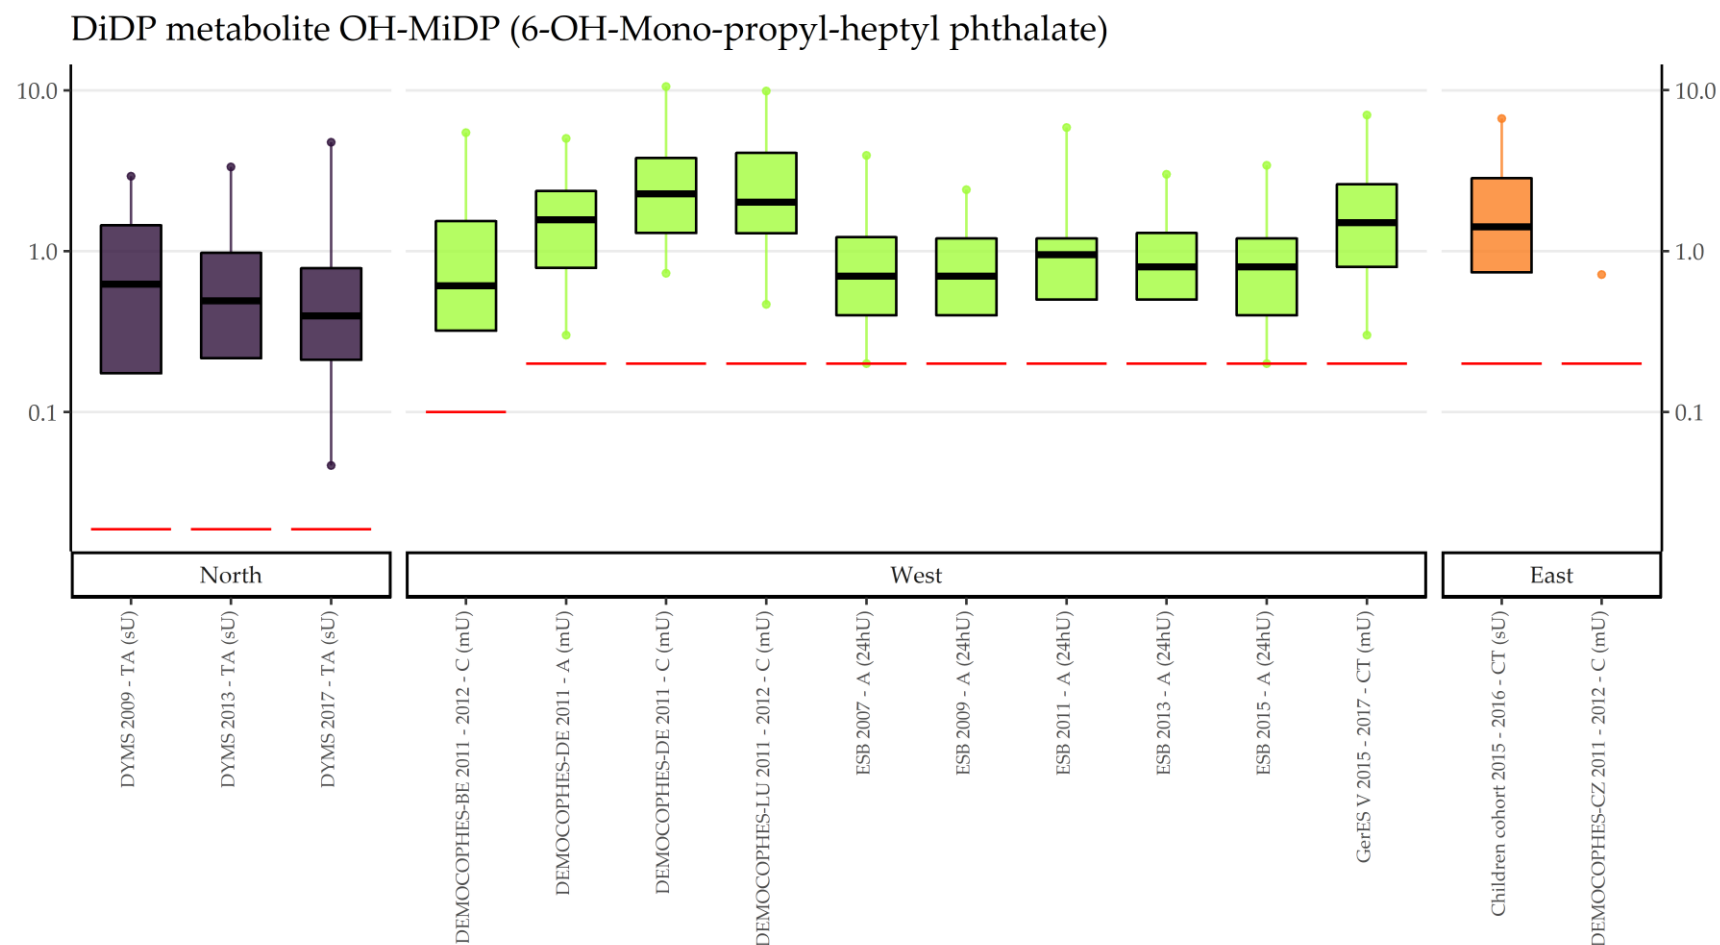

Figure S42. DiDP metabolite OH-MiDP (6-OH-Mono-propyl-heptyl phthalate) concentration in µg/L stratified by region in boxplots.

The box is based on P25, P50, and P75, and the whiskers are based on P5 and P95. Within regions plots are sorted by country and year of sampling. Colors of the boxplots refer to the data collection's region (North = violet, South = blue, West = green, East = orange, Israel = dark red). Red lines denote LOQ/LOD for the respective study. Since percentiles are only available and displayed when they are above LOQ/LOD the lower side of boxplots might be truncated. The age categories are shown in capital letters: children of the age groups 3-5 and 6-11 (C), adolescents between 12 and 19 years (T) and adults from the age groups 20-39, 40-59 and 60 years and older (A). The sampling method is indicated in brackets: first morning urine void (mU), spot urine (sU) and 24-hours urine (24hU).

# DiDP metabolite OH-MiDP (6-OH-Mono-propyl-heptyl phthalate)

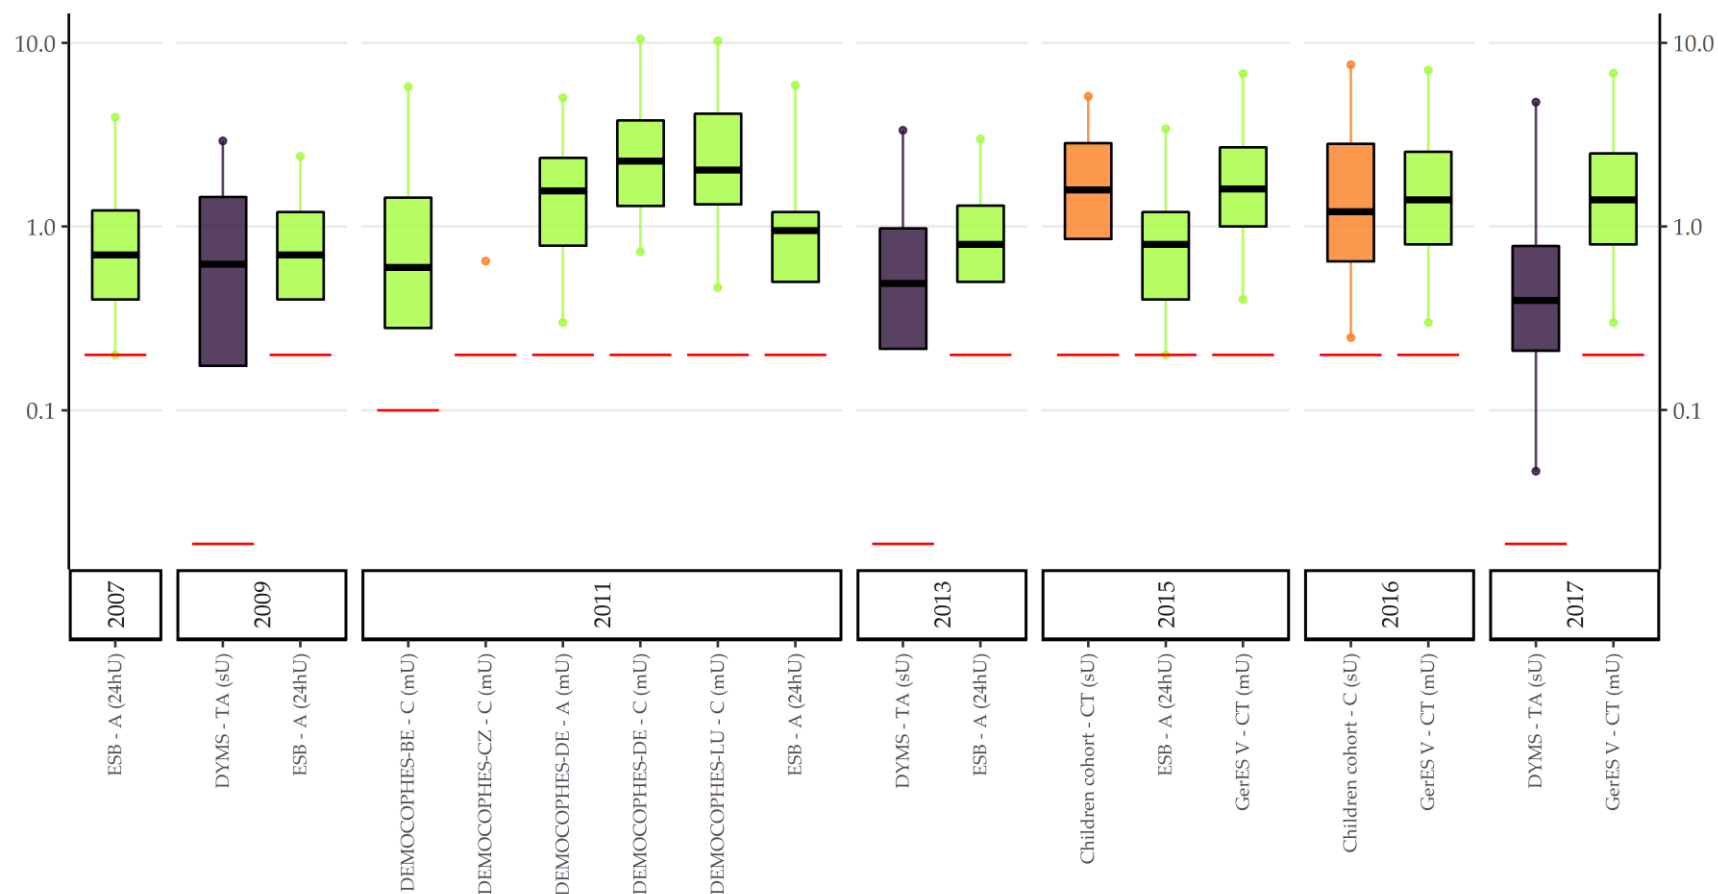

Figure S43. DiDP metabolite OH-MiDP (6-OH-Mono-propyl-heptyl phthalate) concentration in µg/L stratified by sampling year in boxplots.

The box is based on P25, P50, and P75, and the whiskers are based on P5 and P95. Within sampling years plots are sorted by country. Colors of the boxplots refer to the data collection's region (North = violet, South = blue, West = green, East = orange, Israel = dark red). Red lines denote LOQ/LOD for the respective study. Since percentiles are only available and displayed when they are above LOQ/LOD the lower side of boxplots might be truncated. The age categories are shown in capital letters: children of the age groups 3-5 and 6-11 (C), adolescents between 12 and 19 years (T) and adults from the age groups 20-39, 40-59 and 60 years and older (A). The sampling method is indicated in brackets: first morning urine void (mU), spot urine (sU) and 24-hours urine (24hU).

# DiDP metabolite OH-MiDP (6-OH-Mono-propyl-heptyl phthalate)

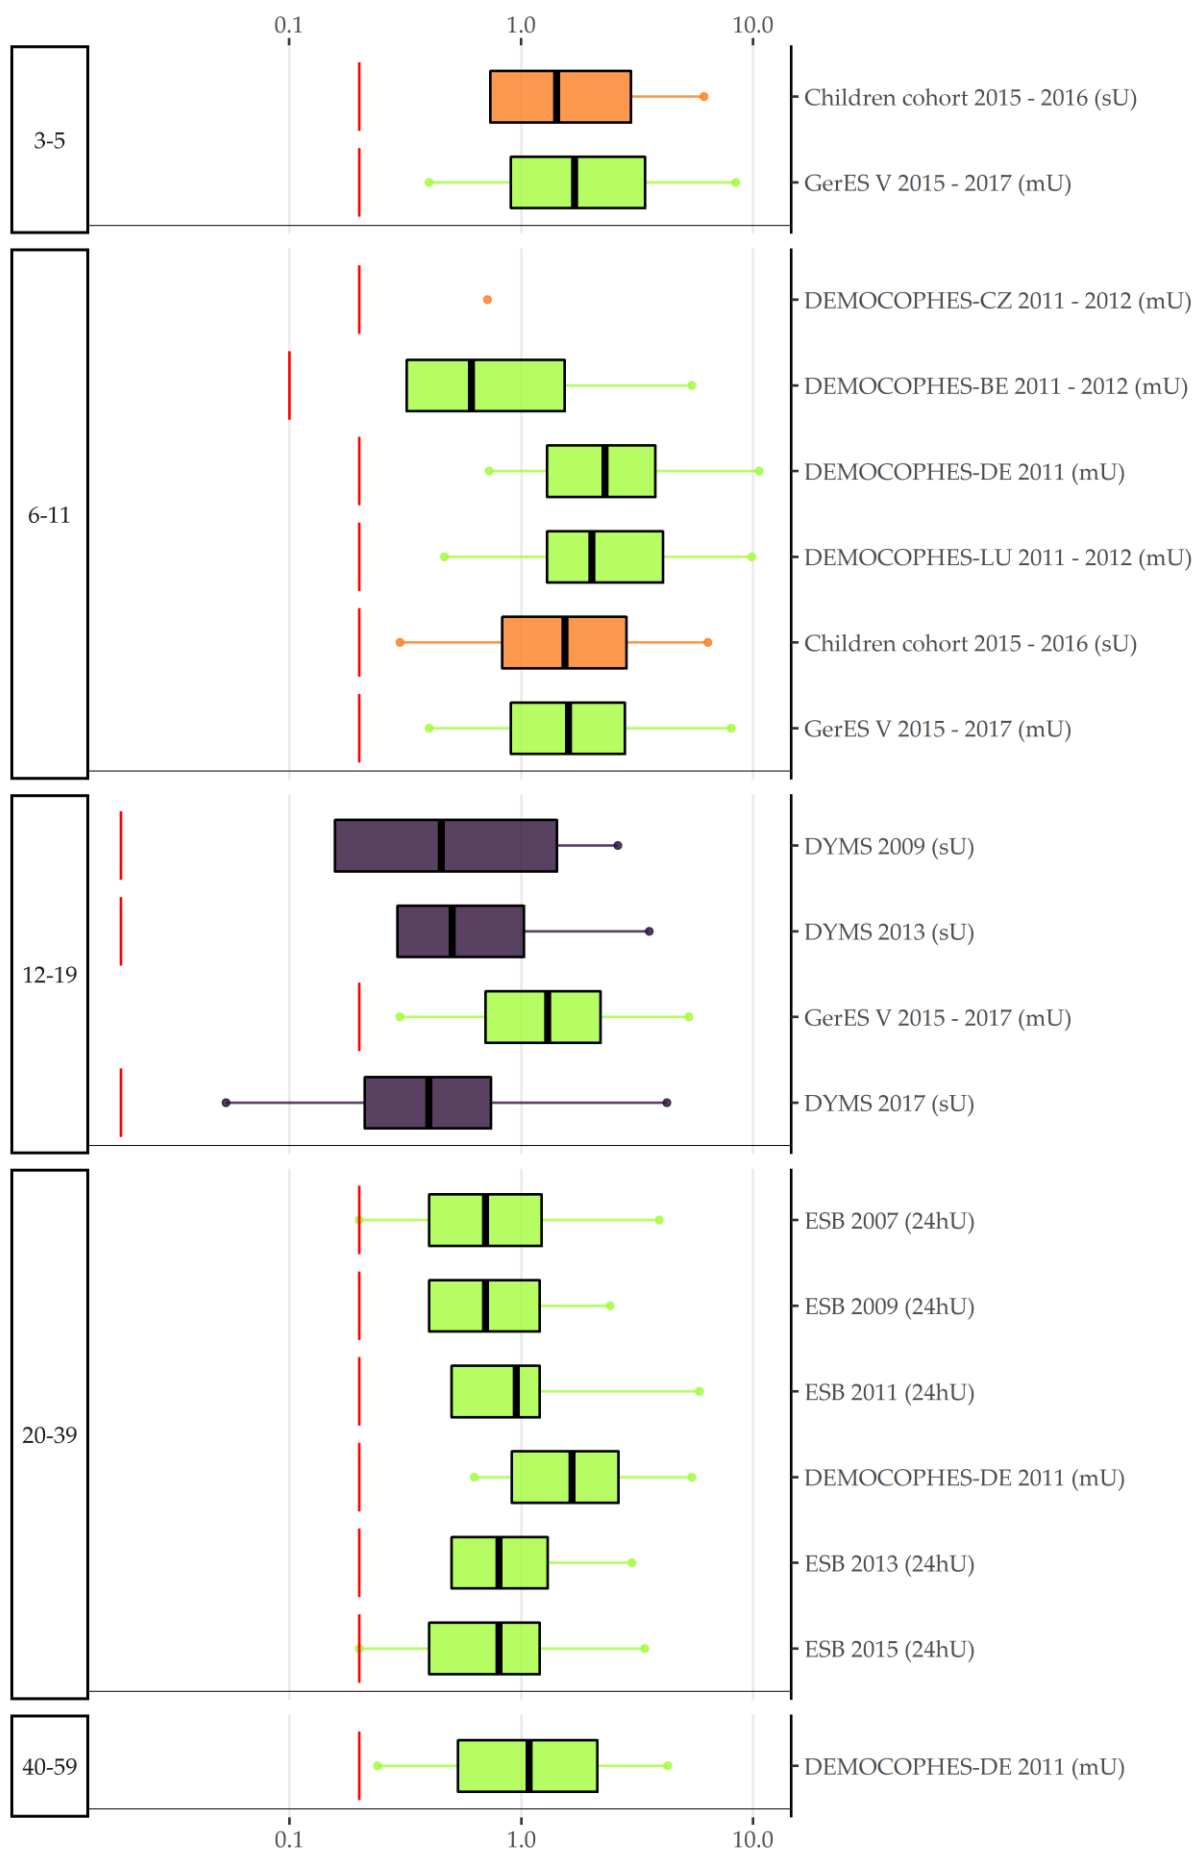

Figure S44. DiDP metabolite OH-MiDP (6-OH-Mono-propyl-heptyl phthalate) concentration in µg/L stratified by age groups in boxplots.

The box is based on P25, P50, and P75, and the whiskers are based on P5 and P95. Within age groups plots are chronologically sorted by year of sampling. Colors of the boxplots refer to the data collection's region (North = violet, South = blue, West = green, East = orange, Israel = dark red). Red lines denote LOQ/LOD for the respective study. Since percentiles are only available and displayed when they are above LOQ/LOD the lower side of boxplots might be truncated. The sampling method is indicated in brackets: first morning urine void (mU), spot urine (sU) and 24-hours urine (24hU).

# DiDP metabolite oxo-MiDP (6-Oxo-Mono-propyl-heptyl phthalate)

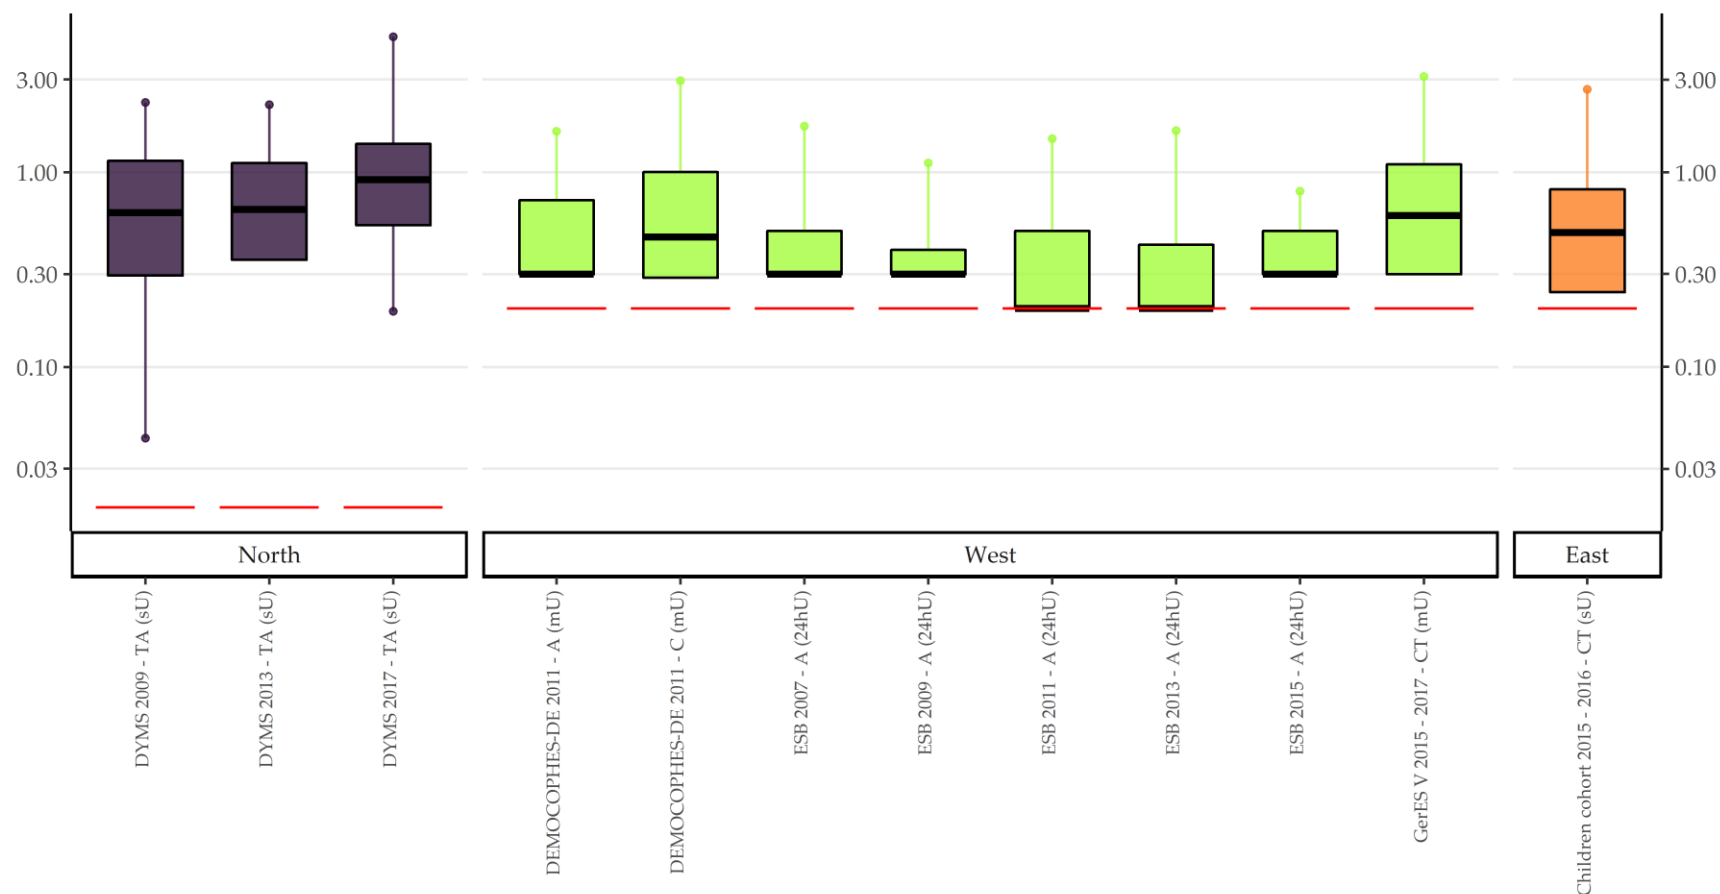

Figure S45. DiDP metabolite oxo-MiDP (6-Oxo-Mono-propyl-heptyl phthalate) concentration in µg/L stratified by region in boxplots.

The box is based on P25, P50, and P75, and the whiskers are based on P5 and P95. Within regions plots are sorted by country and year of sampling. Colors of the boxplots refer to the data collection's region (North = violet, South = blue, West = green, East = orange, Israel = dark red). Red lines denote LOQ/LOD for the respective study. Since percentiles are only available and displayed when they are above LOQ/LOD the lower side of boxplots might be truncated. The age categories are shown in capital letters: children of the age groups 3-5 and 6-11 (C), adolescents between 12 and 19 years (T) and adults from the age groups 20-39, 40-59 and 60 years and older (A). The sampling method is indicated in brackets: first morning urine void (mU), spot urine (sU) and 24-hours urine (24hU).

# DiDP metabolite oxo-MiDP (6-Oxo-Mono-propyl-heptyl phthalate)

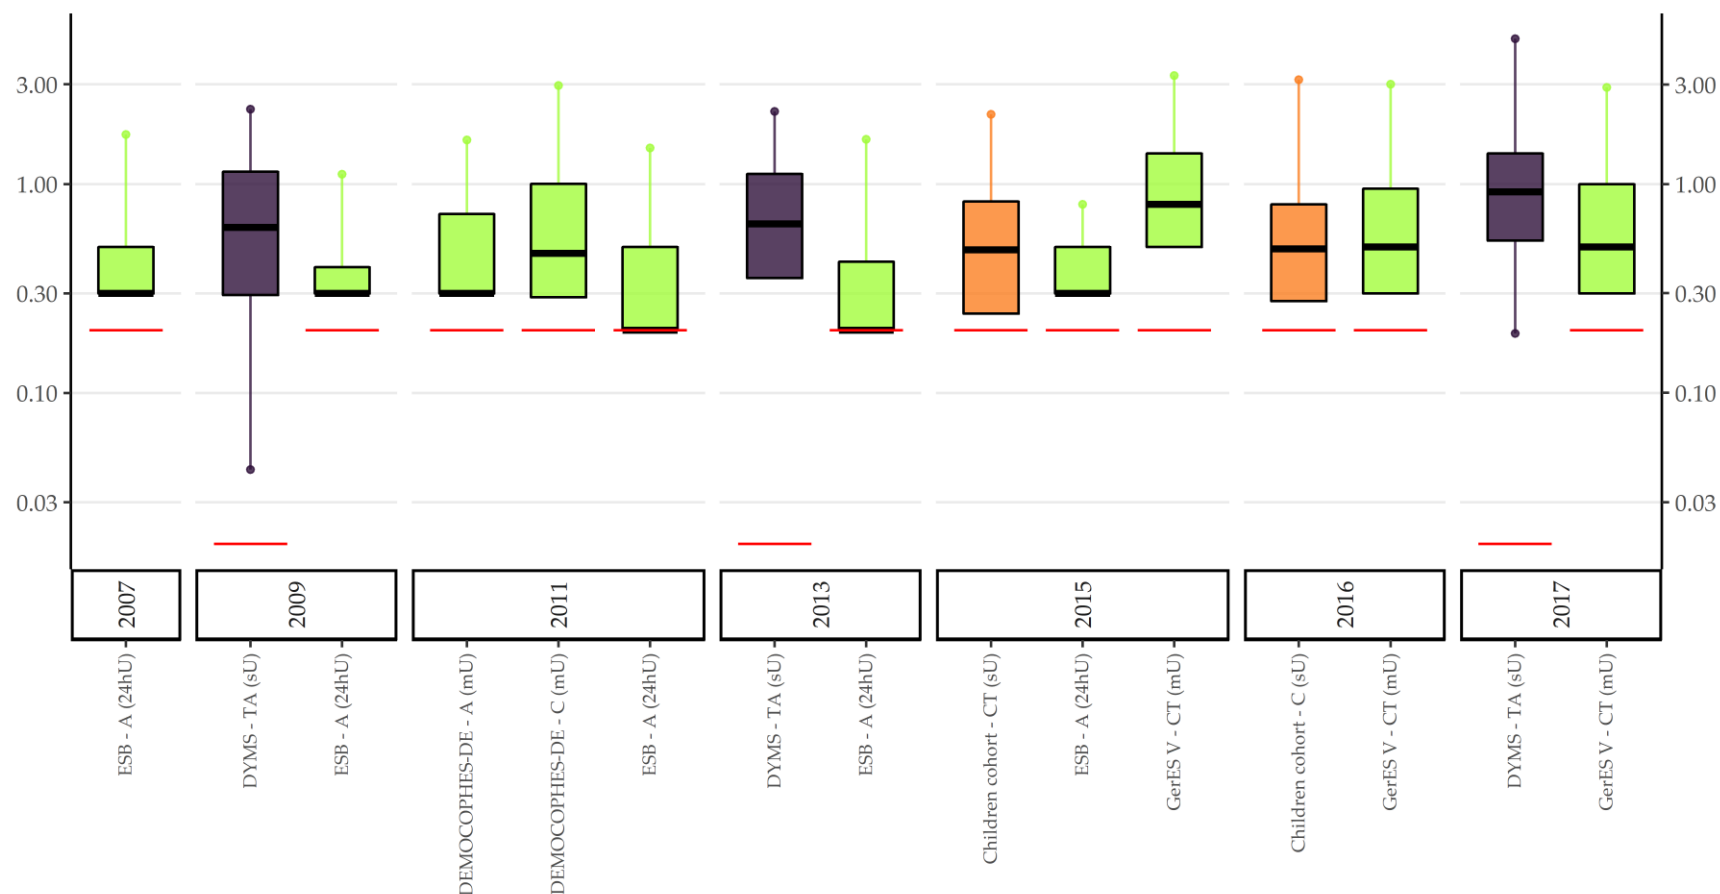

Figure S46. DiDP metabolite oxo-MiDP (6-Oxo-Mono-propyl-heptyl phthalate) concentration in µg/L stratified by sampling year in boxplots.

The box is based on P25, P50, and P75, and the whiskers are based on P5 and P95. Within sampling years plots are sorted by country. Colors of the boxplots refer to the data collection's region (North = violet, South = blue, West = green, East = orange, Israel = dark red). Red lines denote LOQ/LOD for the respective study. Since percentiles are only available and displayed when they are above LOQ/LOD the lower side of boxplots might be truncated. The age categories are shown in capital letters: children of the age groups 3-5 and 6-11 (C), adolescents between 12 and 19 years (T) and adults from the age groups 20-39, 40-59 and 60 years and older (A). The sampling method is indicated in brackets: first morning urine void (mU), spot urine (sU) and 24-hours urine (24hU).

# DiDP metabolite oxo-MiDP (6-Oxo-Mono-propyl-heptyl phthalate)

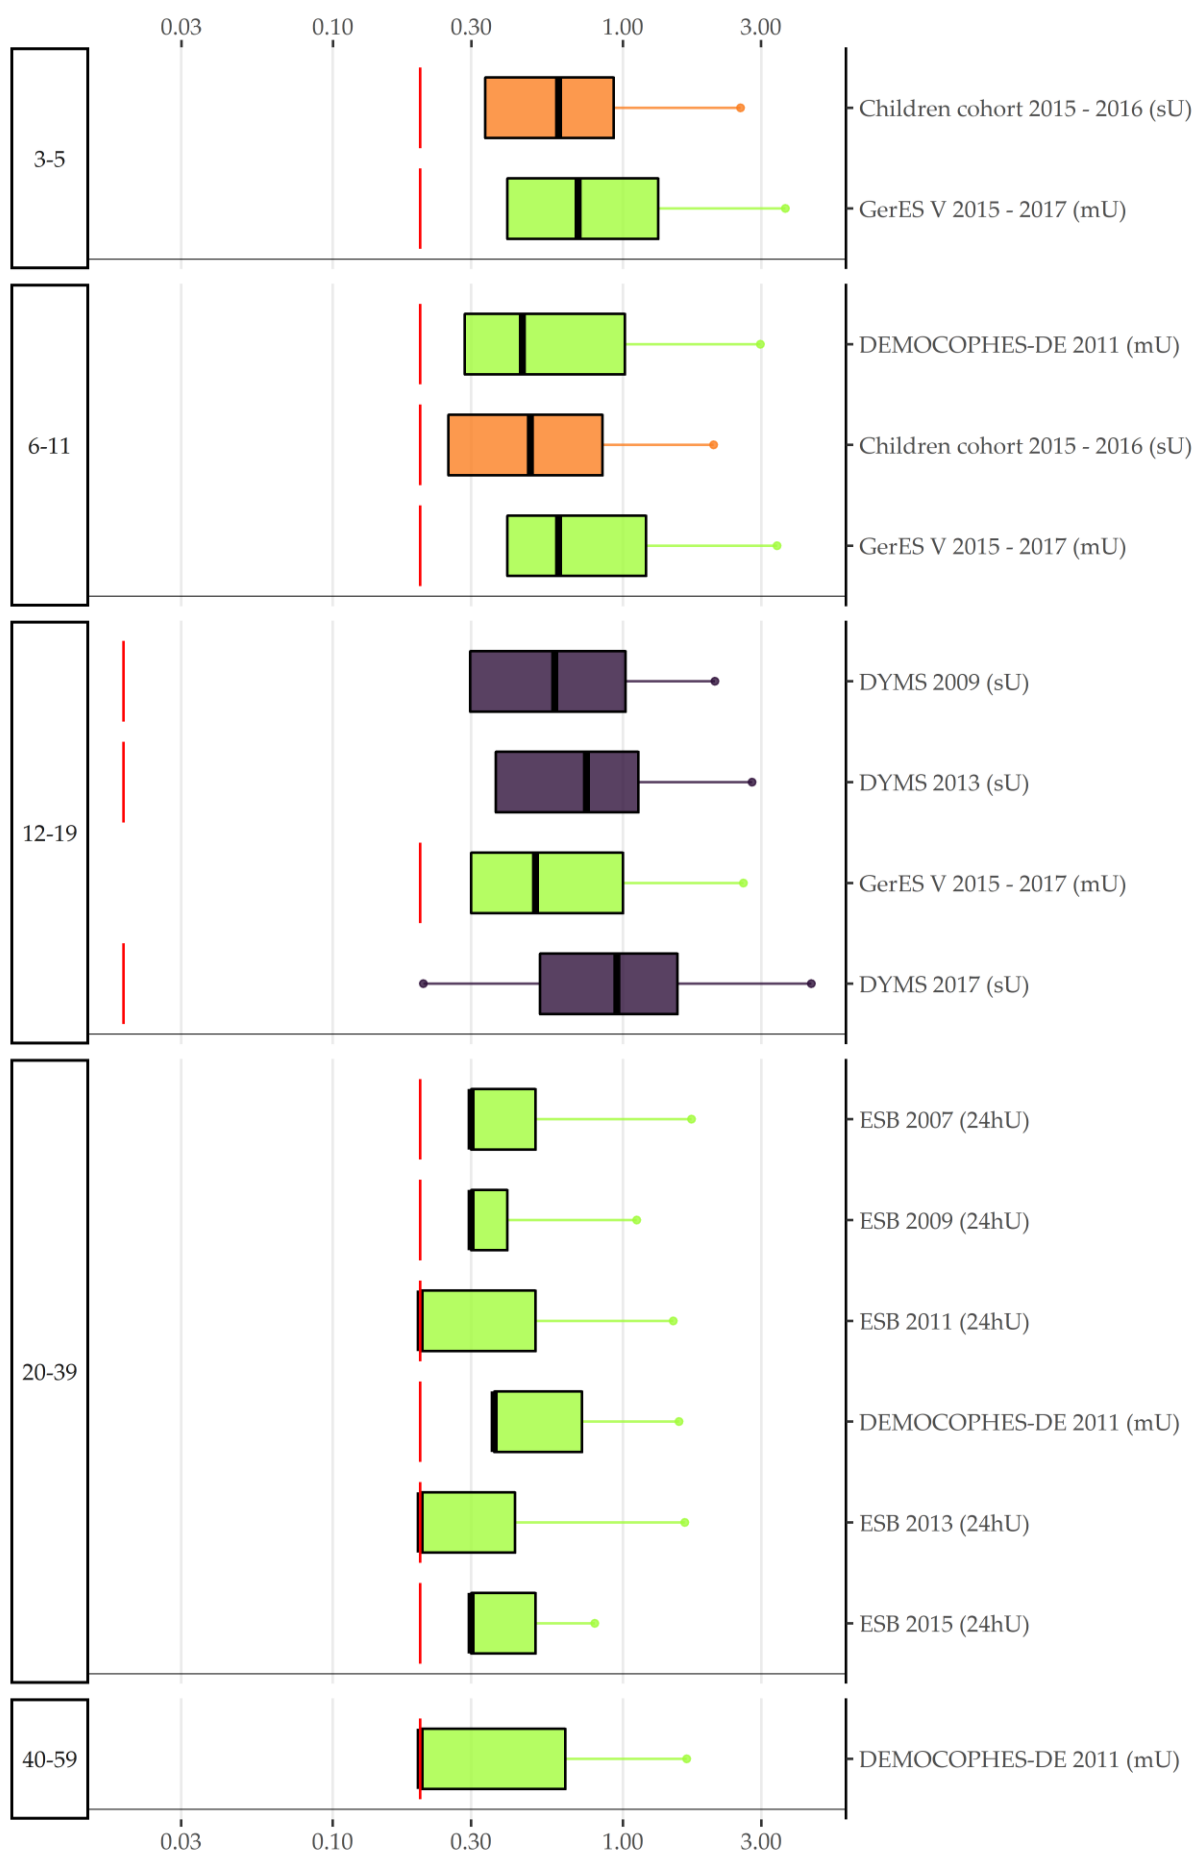

Figure S47. DiDP metabolite oxo-MiDP (6-Oxo-Mono-propyl-heptyl phthalate) concentration in µg/L stratified by age groups in boxplots.

The box is based on P25, P50, and P75, and the whiskers are based on P5 and P95. Within age groups plots are chronologically sorted by year of sampling. Colors of the boxplots refer to the data collection's region (North = violet, South = blue, West = green, East = orange, Israel = dark red). Red lines denote LOQ/LOD for the respective study. Since percentiles are only available and displayed when they are above LOQ/LOD the lower side of boxplots might be truncated. The sampling method is indicated in brackets: first morning urine void (mU), spot urine (sU) and 24-hours urine (24hU).

# DINCH metabolite cx-MINCH (cyclohexane-1,2- dicarboxylate-mono-(7- carboxylate-4- methyl)heptyl ester)

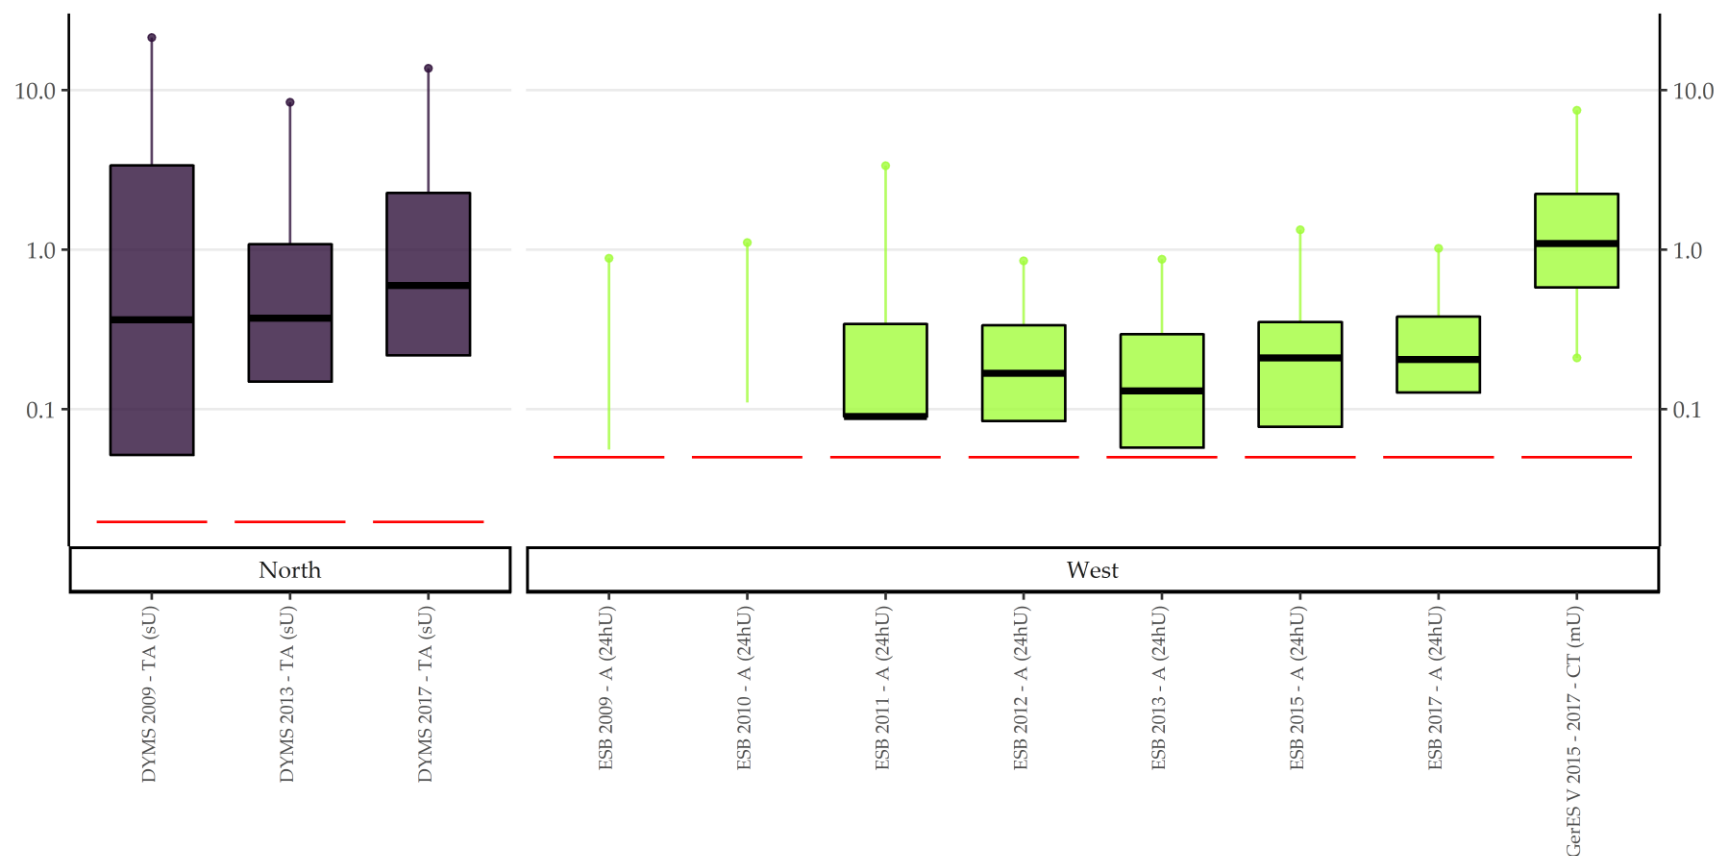

Figure S48. DINCH metabolite cx-MINCH (cyclohexane-1,2- dicarboxylate-mono-(7- carboxylate-4- methyl)heptyl ester) concentration in µg/L stratified by region in boxplots.

The box is based on P25, P50, and P75, and the whiskers are based on P5 and P95. Within regions plots are sorted by country and year of sampling. Colors of the boxplots refer to the data collection's region (North = violet, South = blue, West = green, East = orange, Israel = dark red). Red lines denote LOQ/LOD for the respective study. Since percentiles are only available and displayed when they are above LOQ/LOD the lower side of boxplots might be truncated. The age categories are shown in capital letters: children of the age groups 3-5 and 6-11 (C), adolescents between 12 and 19 years (T) and adults from the age groups 20-39, 40-59 and 60 years and older (A). The sampling method is indicated in brackets: first morning urine void (mU), spot urine (sU) and 24-hours urine (24hU).

# DINCH metabolite cx-MINCH (cyclohexane-1,2- dicarboxylate-mono-(7- carboxylate-4- methyl)heptyl ester)

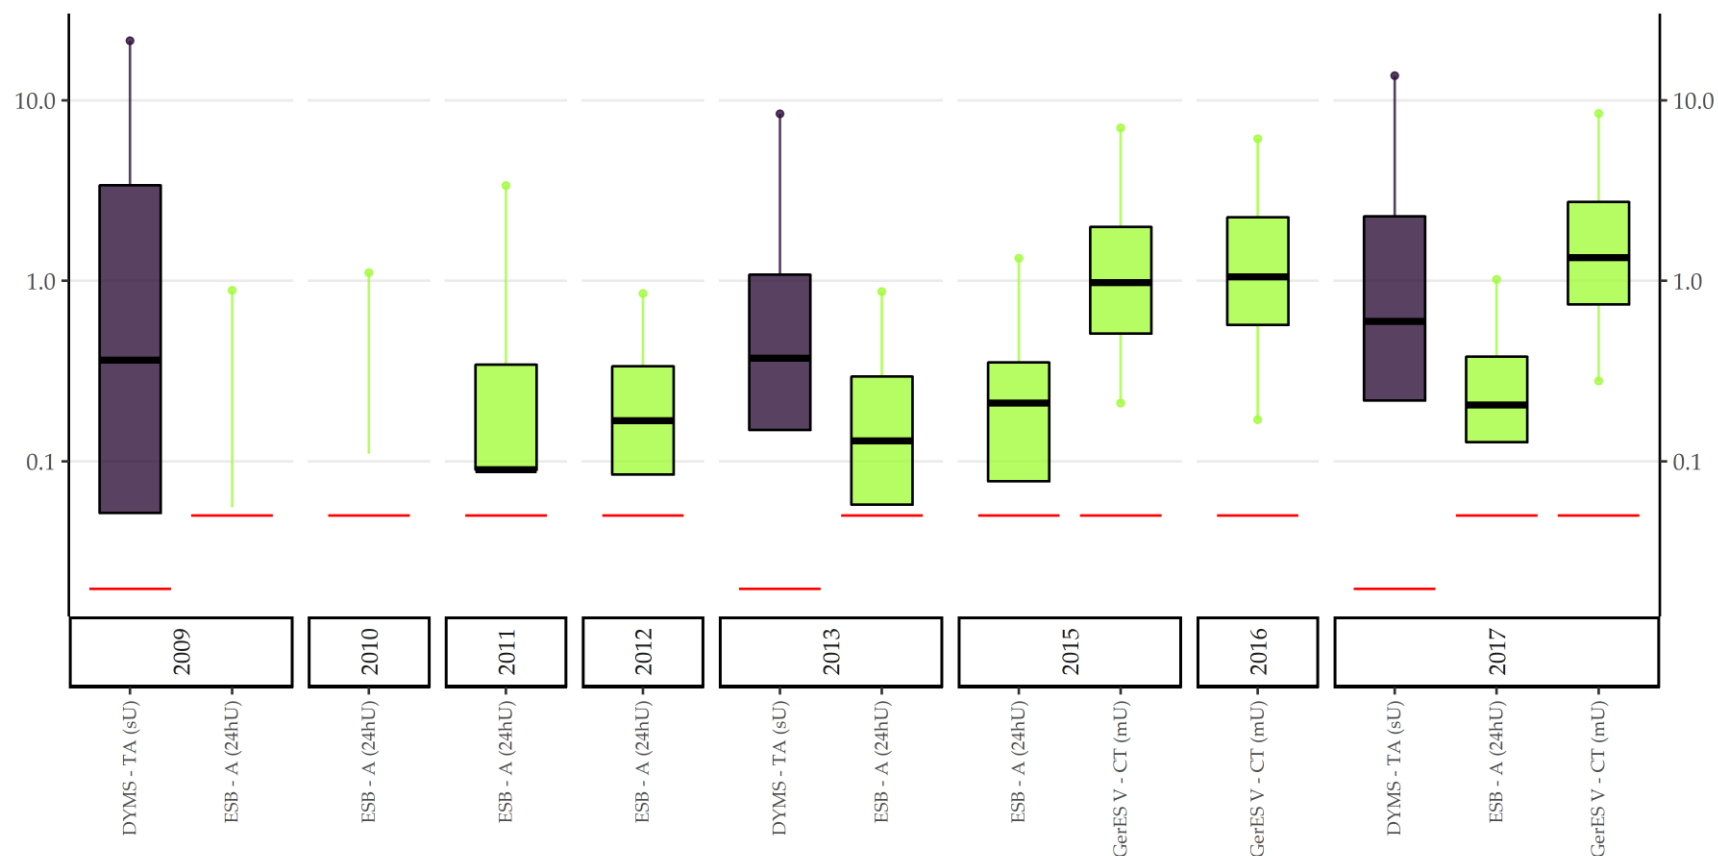

Figure S49. DINCH metabolite cx-MINCH (cyclohexane-1,2- dicarboxylate-mono-(7- carboxylate-4- methyl)heptyl ester) concentration in µg/L stratified by sampling year in boxplots.

The box is based on P25, P50, and P75, and the whiskers are based on P5 and P95. Within sampling years plots are sorted by country. Colors of the boxplots refer to the data collection's region (North = violet, South = blue, West = green, East = orange, Israel = dark red). Red lines denote LOQ/LOD for the respective study. Since percentiles are only available and displayed when they are above LOQ/LOD the lower side of boxplots might be truncated. The age categories are shown in capital letters: children of the age groups 3-5 and 6-11 (C), adolescents between 12 and 19 years (T) and adults from the age groups 20-39, 40-59 and 60 years and older (A). The sampling method is indicated in brackets: first morning urine void (mU), spot urine (sU) and 24-hours urine (24hU).

DINCH metabolite cx-MINCH (cyclohexane-1,2- dicarboxylate-mono-(7-carboxylate-4- methyl)heptyl ester)

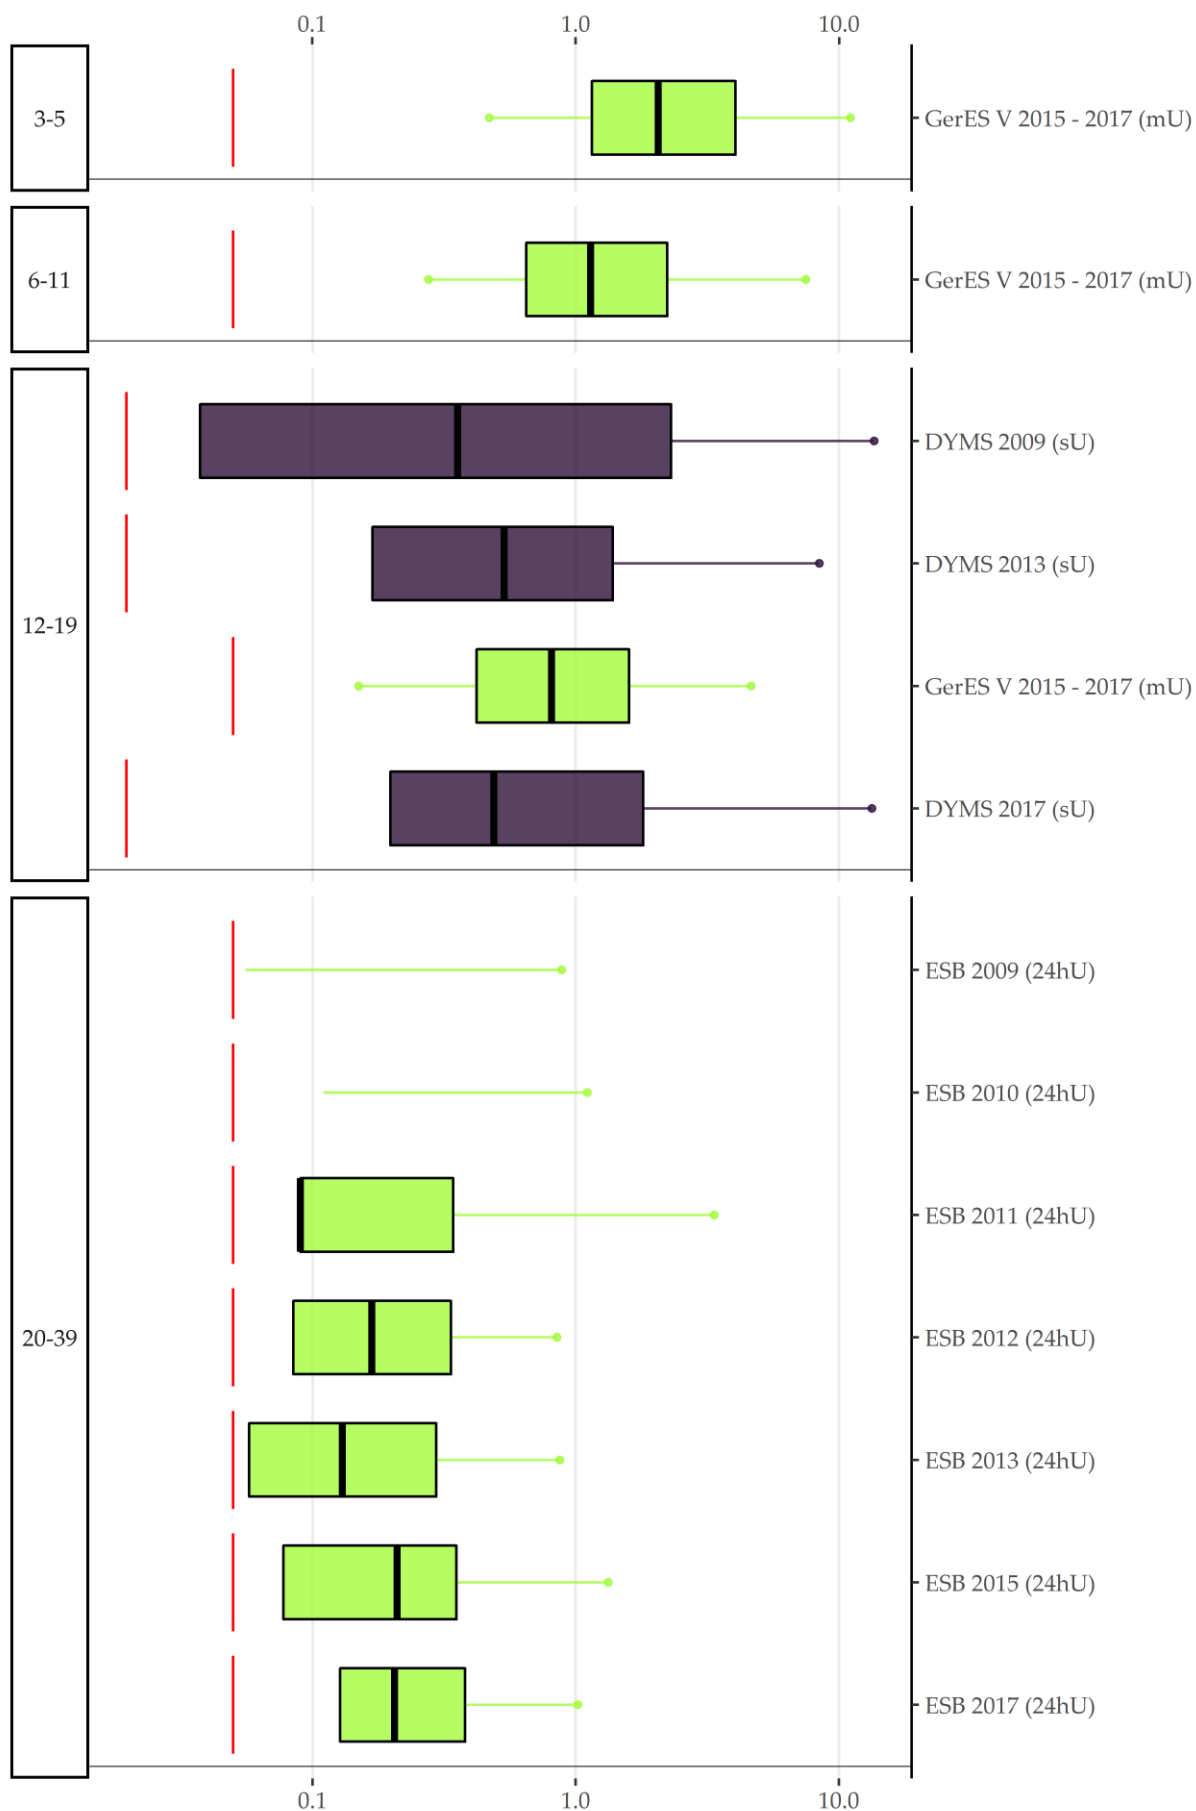

Figure S50. DINCH metabolite cx-MINCH (cyclohexane-1,2- dicarboxylate-mono-(7-carboxylate-4- methyl)heptyl ester) concentration in µg/L stratified by age groups in boxplots.

The box is based on P25, P50, and P75, and the whiskers are based on P5 and P95. Within age groups plots are chronologically sorted by year of sampling. Colors of the boxplots refer to the data collection's region (North = violet, South = blue, West = green, East = orange, Israel = dark red). Red lines denote LOQ/LOD for the respective study. Since percentiles are only available and displayed when they are above LOQ/LOD the lower side of boxplots might be truncated. The sampling method is indicated in brackets: first morning urine void (mU), spot urine (sU) and 24-hours urine (24hU).

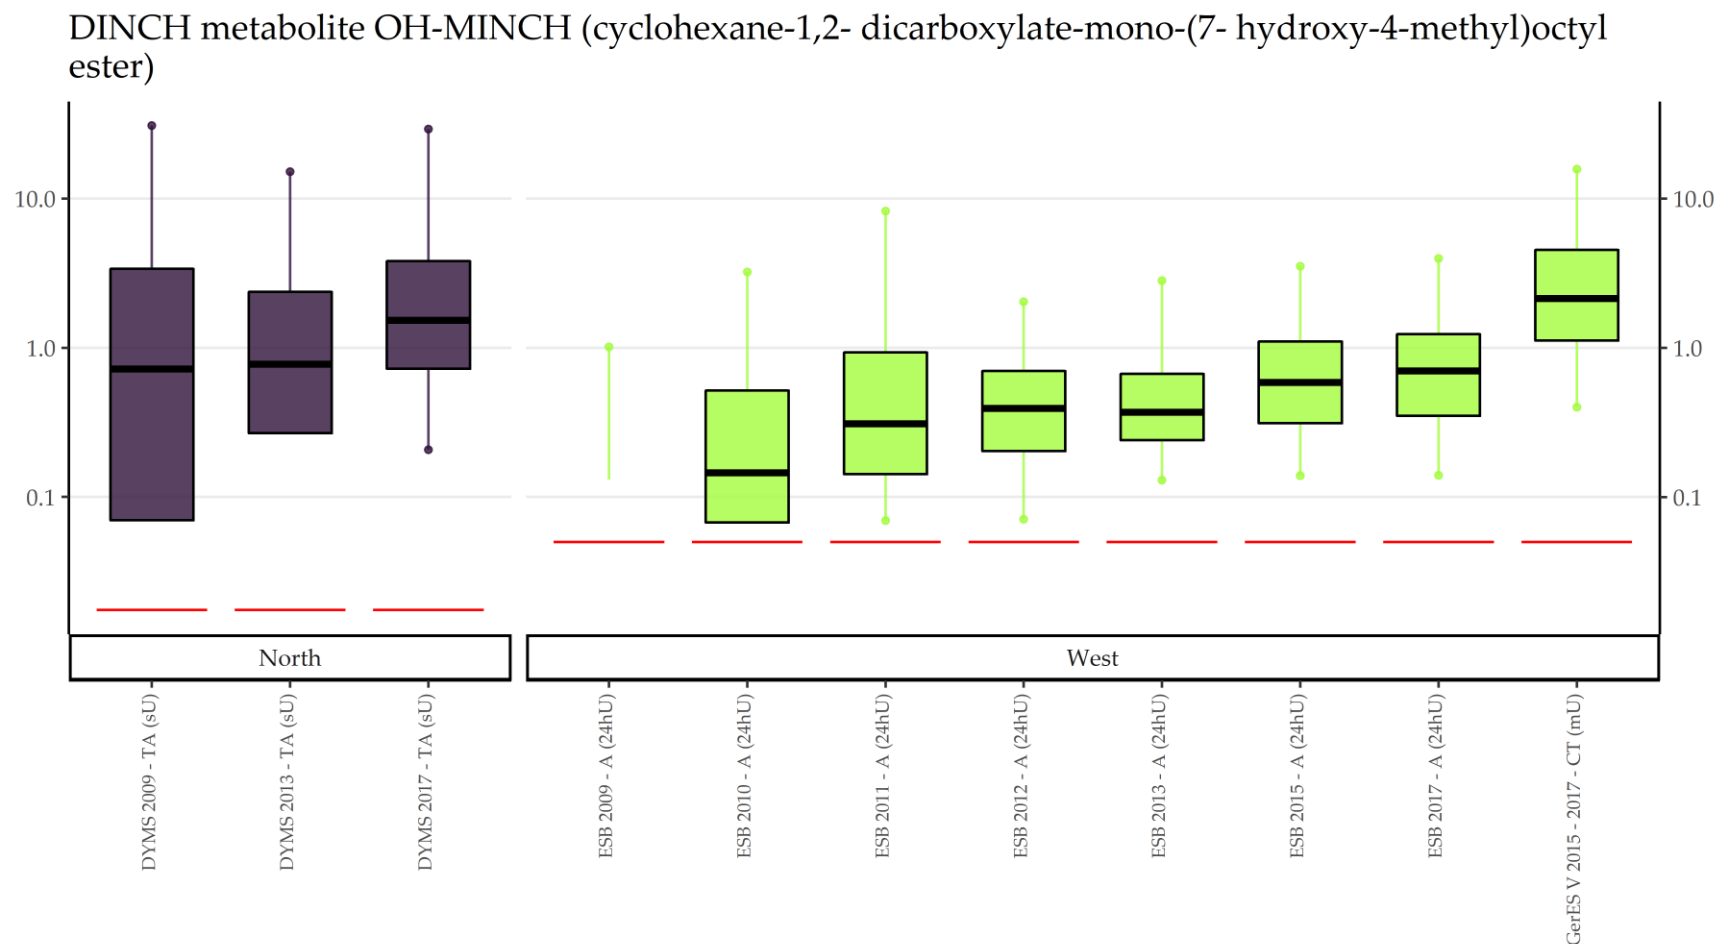

Figure S51. DINCH metabolite OH-MINCH (cyclohexane-1,2- dicarboxylate-mono-(7- hydroxy-4-methyl)octyl ester) concentration in µg/L stratified by region in boxplots.

The box is based on P25, P50, and P75, and the whiskers are based on P5 and P95. Within regions plots are sorted by country and year of sampling. Colors of the boxplots refer to the data collection's region (North = violet, South = blue, West = green, East = orange, Israel = dark red). Red lines denote LOQ/LOD for the respective study. Since percentiles are only available and displayed when they are above LOQ/LOD the lower side of boxplots might be truncated. The age categories are shown in capital letters: children of the age groups 3-5 and 6-11 (C), adolescents between 12 and 19 years (T) and adults from the age groups 20-39, 40-59 and 60 years and older (A). The sampling method is indicated in brackets: first morning urine void (mU), spot urine (sU) and 24-hours urine (24hU).

# DINCH metabolite OH-MINCH (cyclohexane-1,2- dicarboxylate-mono-(7- hydroxy-4-methyl)octyl ester)

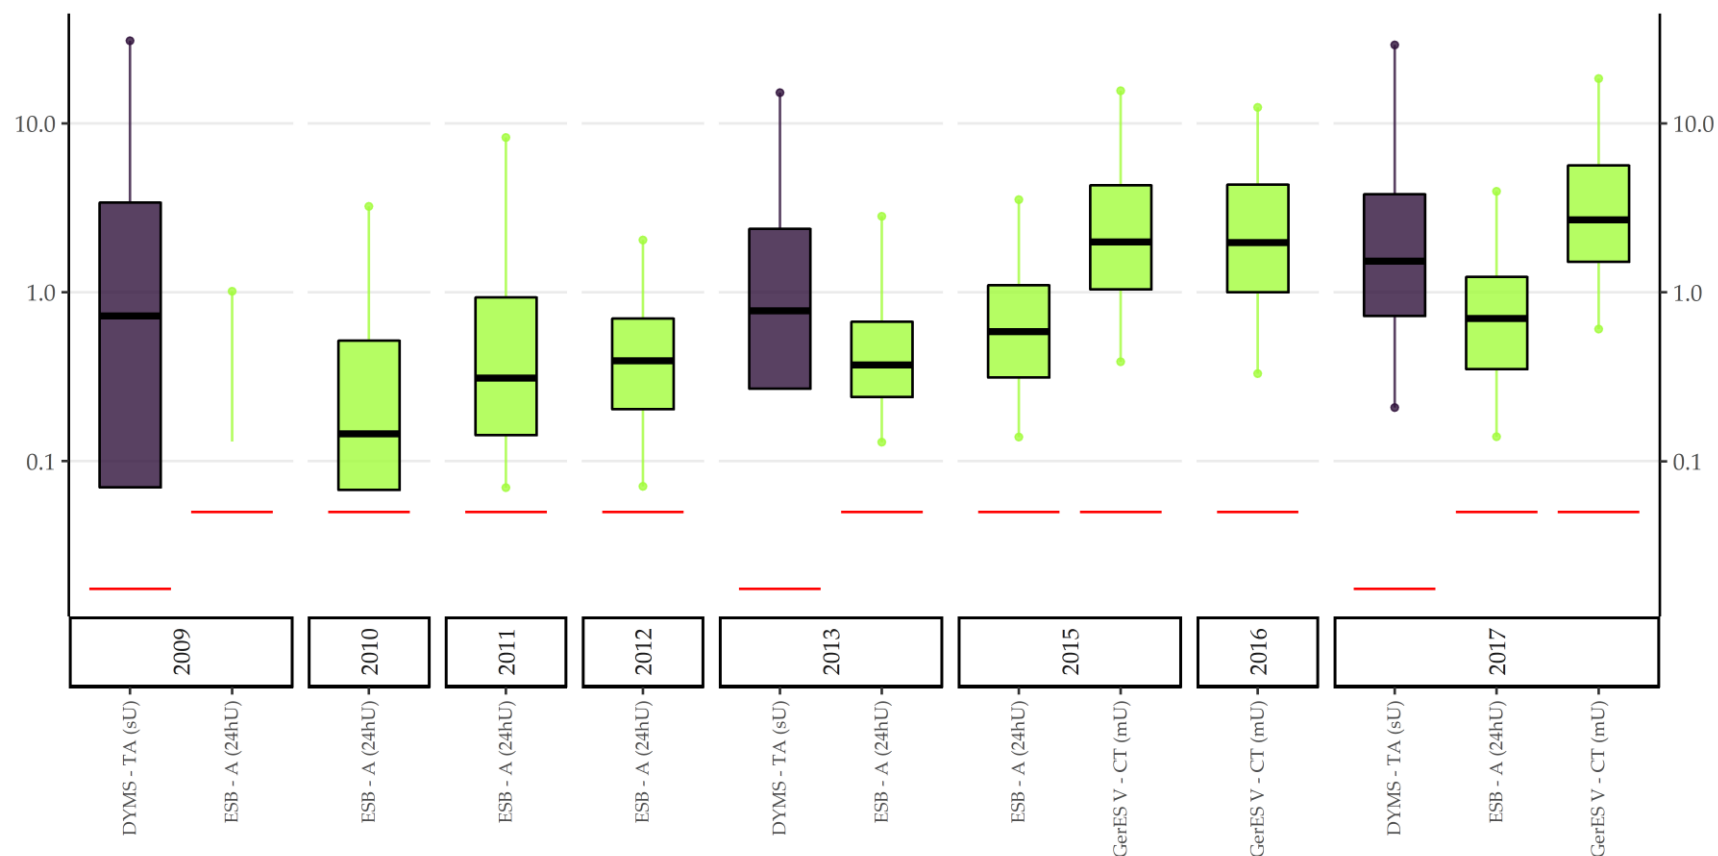

Figure S52. DINCH metabolite OH-MINCH (cyclohexane-1,2- dicarboxylate-mono-(7- hydroxy-4-methyl)octyl ester) concentration in µg/L stratified by sampling year in boxplots.

The box is based on P25, P50, and P75, and the whiskers are based on P5 and P95. Within sampling years plots are sorted by country. Colors of the boxplots refer to the data collection's region (North = violet, South = blue, West = green, East = orange, Israel = dark red). Red lines denote LOQ/LOD for the respective study. Since percentiles are only available and displayed when they are above LOQ/LOD the lower side of boxplots might be truncated. The age categories are shown in capital letters: children of the age groups 3-5 and 6-11 (C), adolescents between 12 and 19 years (T) and adults from the age groups 20-39, 40-59 and 60 years and older (A). The sampling method is indicated in brackets: first morning urine void (mU), spot urine (sU) and 24-hours urine (24hU).

DINCH metabolite OH-MINCH (cyclohexane-1,2- dicarboxylate-mono-(7-hydroxy-4-methyl)octyl ester)

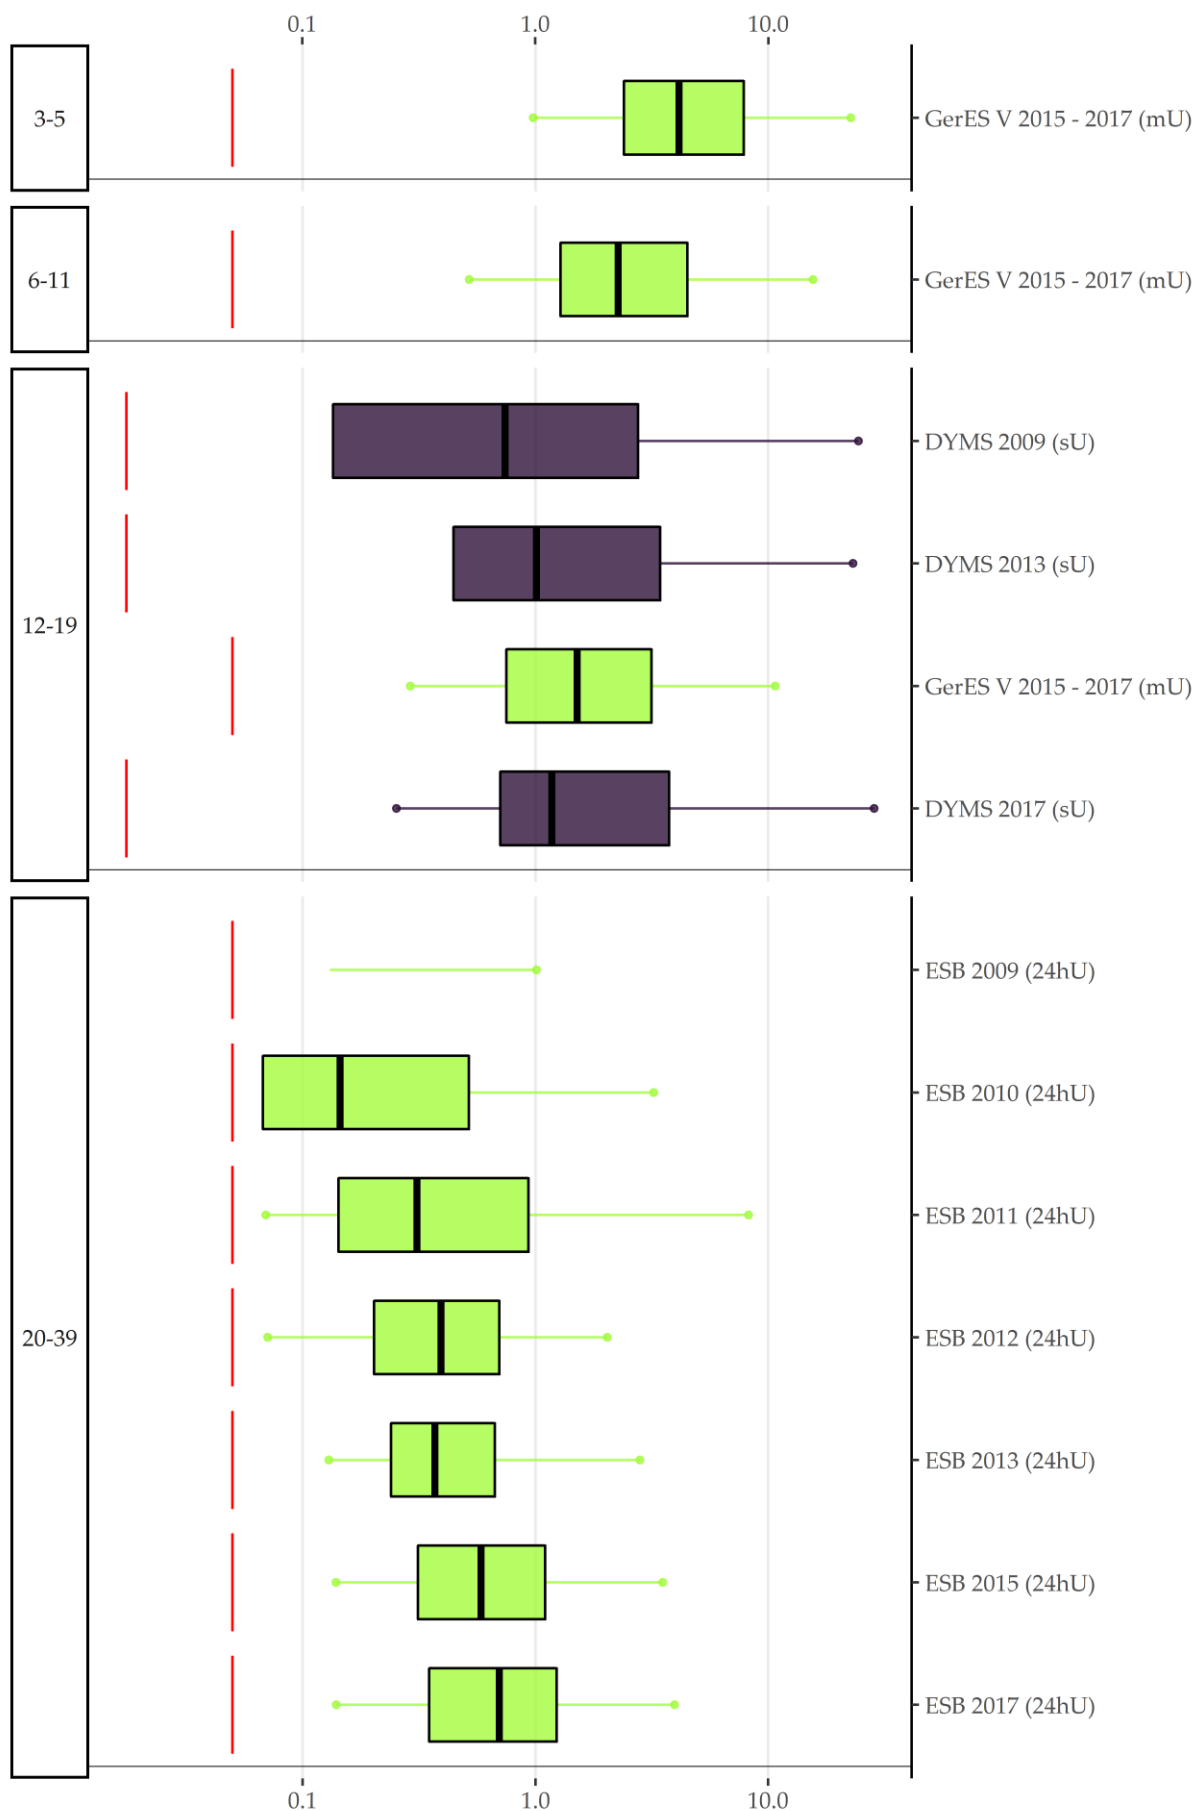

Figure S53. DINCH metabolite OH-MINCH (cyclohexane-1,2- dicarboxylate-mono-(7- hydroxy-4-methyl)octyl ester) concentration in µg/L stratified by age groups in boxplots.

The box is based on P25, P50, and P75, and the whiskers are based on P5 and P95. Within age groups plots are chronologically sorted by year of sampling. Colors of the boxplots refer to the data collection's region (North = violet, South = blue, West = green, East = orange, Israel = dark red). Red lines denote LOQ/LOD for the respective study. Since percentiles are only available and displayed when they are above LOQ/LOD the lower side of boxplots might be truncated. The sampling method is indicated in brackets: first morning urine void (mU), spot urine (sU) and 24-hours urine (24hU).

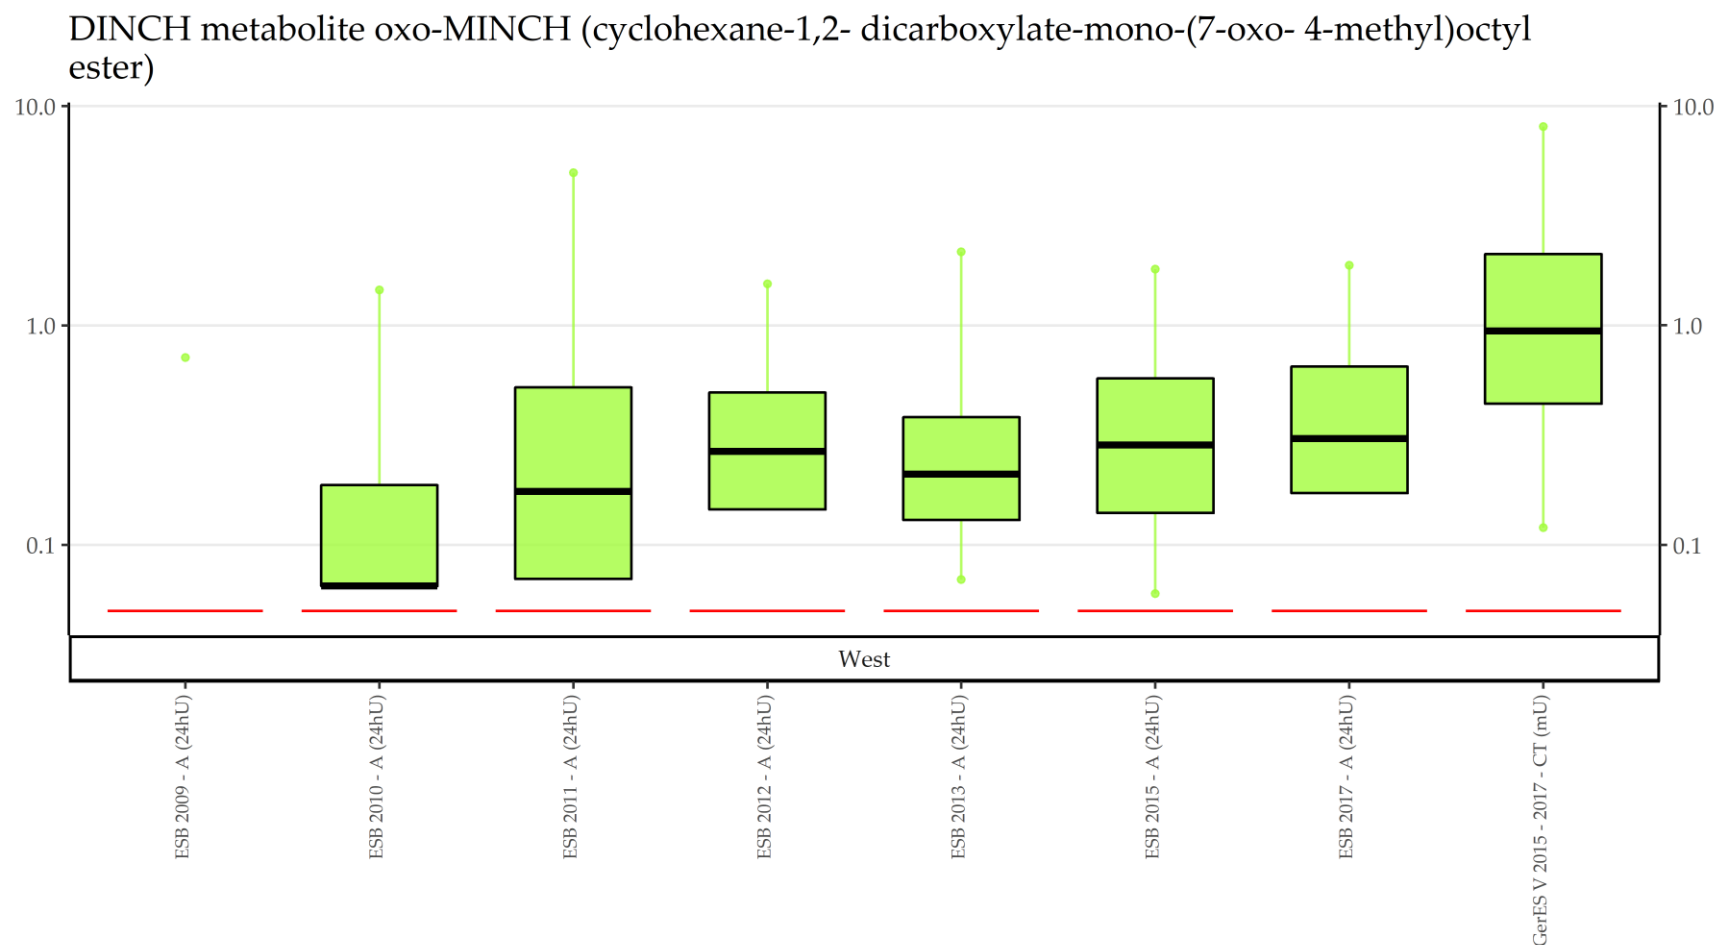

Figure S54. DINCH metabolite oxo-MINCH (cyclohexane-1,2- dicarboxylate-mono-(7-oxo- 4-methyl)octyl ester) concentration in  $\mu\text{g/L}$  stratified by region in boxplots.

The box is based on P25, P50, and P75, and the whiskers are based on P5 and P95. Within regions plots are sorted by country and year of sampling. Colors of the boxplots refer to the data collection's region (North = violet, South = blue, West = green, East = orange, Israel = dark red). Red lines denote LOQ/LOD for the respective study. Since percentiles are only available and displayed when they are above LOQ/LOD the lower side of boxplots might be truncated. The age categories are shown in capital letters: children of the age groups 3-5 and 6-11 (C), adolescents between 12 and 19 years (T) and adults from the age groups 20-39, 40-59 and 60 years and older (A). The sampling method is indicated in brackets: first morning urine void (mU), spot urine (sU) and 24-hours urine (24hU).

# DINCH metabolite oxo-MINCH (cyclohexane-1,2- dicarboxylate-mono-(7-oxo- 4-methyl)octyl ester)

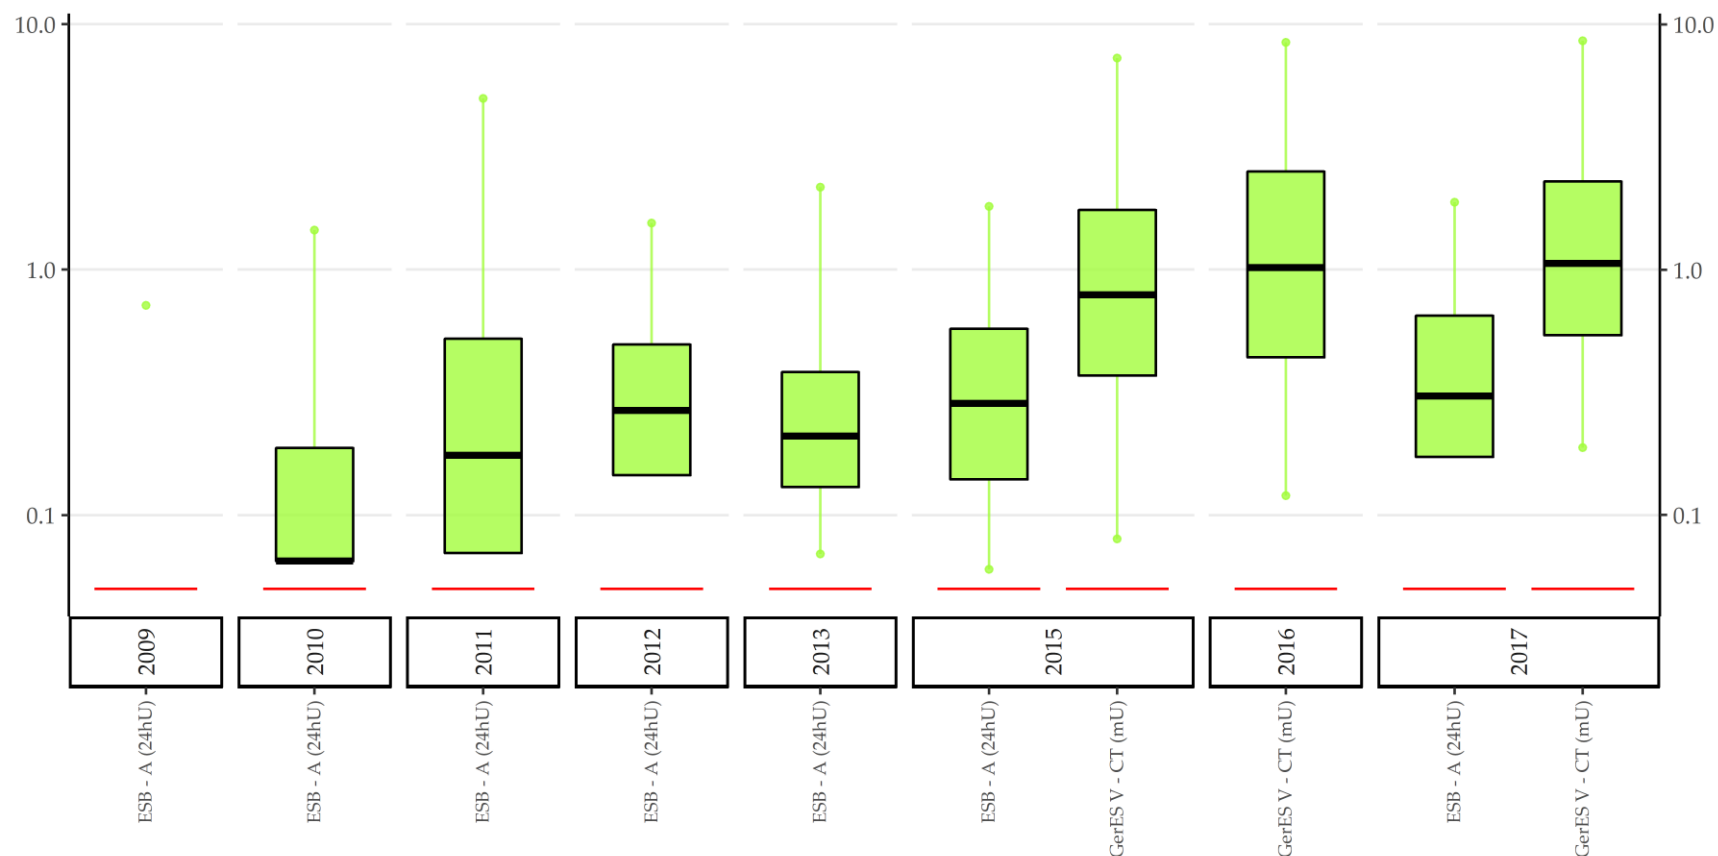

Figure S55. DINCH metabolite oxo-MINCH (cyclohexane-1,2- dicarboxylate-mono-(7-oxo- 4-methyl)octyl ester) concentration in µg/L stratified by sampling year in boxplots.

The box is based on P25, P50, and P75, and the whiskers are based on P5 and P95. Within sampling years plots are sorted by country. Colors of the boxplots refer to the data collection's region (North = violet, South = blue, West = green, East = orange, Israel = dark red). Red lines denote LOQ/LOD for the respective study. Since percentiles are only available and displayed when they are above LOQ/LOD the lower side of boxplots might be truncated. The age categories are shown in capital letters: children of the age groups 3-5 and 6-11 (C), adolescents between 12 and 19 years (T) and adults from the age groups 20-39, 40-59 and 60 years and older (A). The sampling method is indicated in brackets: first morning urine void (mU), spot urine (sU) and 24-hours urine (24hU).

DINCH metabolite oxo-MINCH (cyclohexane-1,2-dicarboxylate-mono-(7-oxo- 4-methyl)octyl ester)

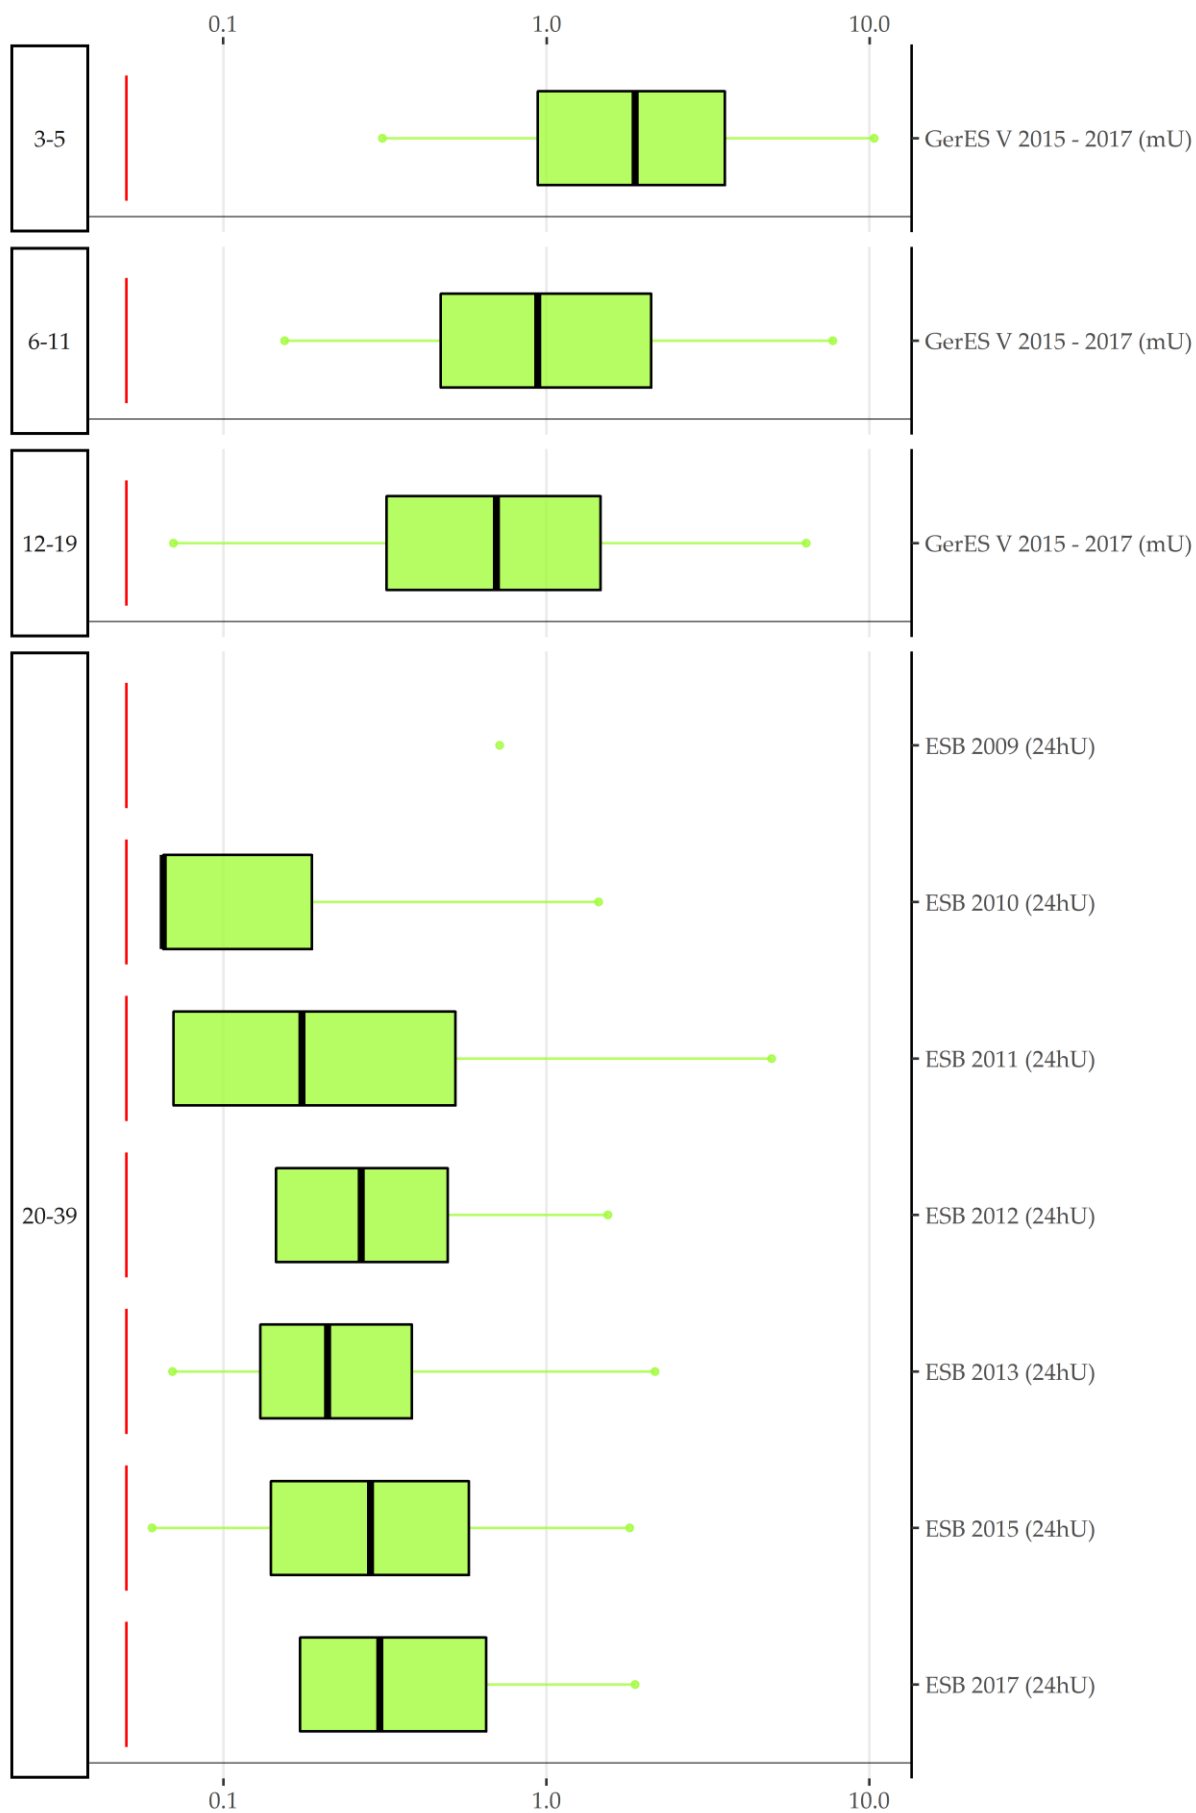

Figure S56. DINCH metabolite oxo-MINCH (cyclohexane-1,2- dicarboxylate-mono-(7-oxo- 4-methyl)octyl ester) concentration in µg/L stratified by age groups in boxplots.

The box is based on P25, P50, and P75, and the whiskers are based on P5 and P95. Within age groups plots are chronologically sorted by year of sampling. Colors of the boxplots refer to the data collection's region (North = violet, South = blue, West = green, East = orange, Israel = dark red). Red lines denote LOQ/LOD for the respective study. Since percentiles are only available and displayed when they are above LOQ/LOD the lower side of boxplots might be truncated. The sampling method is indicated in brackets: first morning urine void (mU), spot urine (sU) and 24-hours urine (24hU).
